# Supplementary material for: Edwardsiella Comparative Phylogenomics Reveal the New Intra/Inter-Species Taxonomic Relationships, Virulence Evolution and Niche Adaptation Mechanisms
Source: PLoS One. 2012 May 10;7(5):e36987. doi: 10.1371/journal.pone.0036987 (PMC3349661; doi:10.1371/journal.pone.0036987)
Supplement: Table S5 — Multilocus sequence analysis of 48 strains. (XLS) [file pone.0036987.s009.xls]

## Sheet: Sheet2
Biological source	Origin and Year	Strain
Marbled eel	Fujian, China, 2008	E. tarda 070829
Marbled eel	Fujian, China, 2008	E. tarda ET080729
Japanese eel	Fujian, China, 2008	E. tarda 080813-2
Turbot	Shandong, China, 2006	E. tarda EIB103
Turbot	Shandong, China, 2006	E. tarda EIB15
Turbot	Shandong, China, 2006	E. tarda EIB107
Turbot	Shandong, China, 2006	E. tarda EIB203
Turbot	Yantai, China, 2008	E. tarda EIB202
Turbot	Shandong, China, 2006	E. tarda EIB306
Turbot	Shandong, China, 2006	E. tarda EIB307
Turbot	Shandong, China, 2006	E. tarda LTB4
Turbot	Shandong, China, 2006	E. tarda ET-Wang
Turbot	Shandong, China, 2006	E. tarda ET-Mo
Flounder	Shandong, China, 2005	E. tarda EIB05-1
Flounder	Anhui, China, 2005	E. tarda BYK00679
Unkown	Jiangxi, China, 2005	E. tarda BYK00685
Unkown	Anhui, China, 2005	E. tarda BYK00680
Unkown	Jiangxi, China, 2005	E. tarda BYK00691
Japanese eel	Guangdong, China, 2008	E. tarda GhAn70310
Flounder	Hebei, China, 2003	E. tarda LN031012-8
Turbot	Shandong, China, 2006	E. tarda WY28
Oscar fish	Guangdong, China, 2007	E. tarda DT
Marbled eel	Fujian, China, 2008	E. tarda 080805
American eel	Fujian, China, 2008	E. tarda ET081126R
Japanese eel	Fujian, China, 2008	E. tarda 080814
Marbled eel	Fujian, China, 2008	E. tarda ET080729-1
Flounder	Shandong, China, 2006	E. tarda TX42
Turbot	Tianjin, China, 2003	E. tarda TJ090818
Human feces	Fujian, China, 2006	E. tarda ETV
Turbot	Liaoning, China, 2006	E. tarda L-49231
Turbot	Shandong, China, 2006	E. tarda CW7
Flounder	Shandong, China, 2006	E. tarda TX-1
Turbot	Shandong, China, 2006	E. tarda WY37
Flounder	Shandong, China, 2006	E. tarda EIB02
Flounder	Shandong, China, 2006	E. tarda EIB11
Flounder	Shandong, China, 2006	E. tarda EIB12
Flounder	Shandong, China, 2006	E. tarda EIB17
Flounder	Shandong, China, 2006	E. tarda EIB18
Human feces	Kentucky, U.S.A, 1959	E. tarda ATCC15947
Human feces	U.S.A, 1959	E. tarda ATCC23692
Serpae tetra	Singapore, 2000	E. tarda PPD130/91
Catfish	Liaoning, China, 2006	E. ictaluri LH51
Catfish	Georgia, U.S.A 1976	E. ictaluri ATCC33202
Flounder	Shandong, China, 2010	E. tarda EIB100714
Striped bass	Maryland U.S.A, 1994	E. tarda FL6-60
Human feces	U.S.A, 1959	E. tarda ATCC23685
Catfish	Louisiana, U.S.A, 1993	E. ictaluri 93-146
Japanese eel	Fujian, China, 2008	E. tarda 080813
