# Supplementary material for: Edwardsiella Comparative Phylogenomics Reveal the New Intra/Inter-Species Taxonomic Relationships, Virulence Evolution and Niche Adaptation Mechanisms
Source: PLoS One. 2012 May 10;7(5):e36987. doi: 10.1371/journal.pone.0036987 (PMC3349661; doi:10.1371/journal.pone.0036987)
Supplement: Table S7 — Ortholog distribution in the genomes of the Edwardsiella strains. (XLS) [file pone.0036987.s011.xls]

## Sheet: Edwardsiella core genome
CDS	Gene	Location	Annotation	FL-60	80813	ATCC33202	93-146	ATCC15947	ATCC23685	DT
ETAE_0001	dnaA	Cytoplasmic	ATPase involved in DNA replication initiation	fig|718251.4.peg.1	fig|667120.3.peg.4006	fig|67780.5.peg.180	fig|634503.5.peg.1	fig|667121.3.peg.3325	fig|500638.4.peg.3148	fig|636.4.peg.724
ETAE_0002	dnaN	Cytoplasmic	DNA polymerase III, beta subunit	fig|718251.4.peg.2	fig|667120.3.peg.4007	fig|67780.5.peg.181	fig|634503.5.peg.2	fig|667121.3.peg.3324	fig|500638.4.peg.3147	fig|636.4.peg.725
ETAE_0003	recF	Cytoplasmic	recombinational DNA repair ATPase	fig|718251.4.peg.3	fig|667120.3.peg.4008	fig|67780.5.peg.182	fig|634503.5.peg.3	fig|667121.3.peg.3323	fig|500638.4.peg.3146	fig|636.4.peg.726
ETAE_0004	gyrB	Unknown	DNA gyrase subunit B	fig|718251.4.peg.4	fig|667120.3.peg.4009	fig|67780.5.peg.183	fig|634503.5.peg.4	fig|667121.3.peg.3322	fig|500638.4.peg.3145	fig|636.4.peg.727
ETAE_0005		Unknown	putative hydrolases of the HAD superfamily	fig|718251.4.peg.5	fig|667120.3.peg.4010	fig|67780.5.peg.184	fig|634503.5.peg.5	fig|667121.3.peg.3321	fig|500638.4.peg.3144	fig|636.4.peg.728
ETAE_0006	tolB	Unknown	periplasmic component of the Tol biopolymer transport system	fig|718251.4.peg.6	fig|667120.3.peg.4011	fig|67780.5.peg.185	fig|634503.5.peg.6	fig|667121.3.peg.3320	fig|500638.4.peg.3143	fig|636.4.peg.729
ETAE_0008	ibpA	Cytoplasmic	molecular chaperone (small heat shock protein)	fig|718251.4.peg.8	fig|667120.3.peg.4013	fig|67780.5.peg.187	fig|634503.5.peg.8	fig|667121.3.peg.3318	fig|500638.4.peg.3141	fig|636.4.peg.731
ETAE_0009	ibpB	Cytoplasmic	molecular chaperone (small heat shock protein)	fig|718251.4.peg.9	fig|667120.3.peg.4014	fig|67780.5.peg.188	fig|634503.5.peg.9	fig|667121.3.peg.3317	fig|500638.4.peg.3140	fig|636.4.peg.732
ETAE_0010	avtA	Cytoplasmic	valine-pyruvate aminotransferase	fig|718251.4.peg.10	fig|667120.3.peg.4015	fig|67780.5.peg.189	fig|634503.5.peg.10	fig|667121.3.peg.3316	fig|500638.4.peg.3139	fig|636.4.peg.733
ETAE_0011		Unknown	conserved hypothetical protein	fig|718251.4.peg.11	fig|667120.3.peg.4021	fig|67780.5.peg.190	fig|634503.5.peg.11	fig|667121.3.peg.3315	fig|500638.4.peg.3138	fig|636.4.peg.734
ETAE_0012	glyS	Cytoplasmic	glycyl-tRNA synthetase, beta subunit	fig|718251.4.peg.12	fig|667120.3.peg.4022	fig|67780.5.peg.191	fig|634503.5.peg.12	fig|667121.3.peg.3314	fig|500638.4.peg.3137	fig|636.4.peg.735
ETAE_0013	glyQ	Cytoplasmic	glycyl-tRNA synthetase, alpha subunit	fig|718251.4.peg.13	fig|667120.3.peg.4023	fig|67780.5.peg.192	fig|634503.5.peg.13	fig|667121.3.peg.3313	fig|500638.4.peg.3136	fig|636.4.peg.736
ETAE_0014	tag	Unknown	3-methyladenine DNA glycosylase	fig|718251.4.peg.14	fig|667120.3.peg.4025	fig|67780.5.peg.194	fig|634503.5.peg.15	fig|667121.3.peg.3312	fig|500638.4.peg.3135	fig|636.4.peg.738
ETAE_0015		Unknown	putative acetyltransferase	fig|718251.4.peg.15	fig|667120.3.peg.4026	fig|67780.5.peg.195	fig|634503.5.peg.16	fig|667121.3.peg.3311	fig|500638.4.peg.3134	fig|636.4.peg.739
ETAE_0016		CytoplasmicMembrane	putative membrane protein	fig|718251.4.peg.16	fig|667120.3.peg.4027	fig|67780.5.peg.196	fig|634503.5.peg.17	fig|667121.3.peg.3310	fig|500638.4.peg.3133	fig|636.4.peg.740
ETAE_0017	yiaD	OuterMembrane	putative outer membrane lipoprotein	fig|718251.4.peg.17	fig|667120.3.peg.4028	fig|67780.5.peg.197	fig|634503.5.peg.18	fig|667121.3.peg.3309	fig|500638.4.peg.3132	fig|636.4.peg.741
ETAE_0018	SirA	Unknown	cell developmental protein	fig|718251.4.peg.18	fig|667120.3.peg.4029	fig|67780.5.peg.198	fig|634503.5.peg.19	fig|667121.3.peg.3308	fig|500638.4.peg.3131	fig|636.4.peg.742
ETAE_0019		CytoplasmicMembrane	conserved hypothetical protein	fig|718251.4.peg.19	fig|667120.3.peg.4030	fig|67780.5.peg.200	fig|634503.5.peg.20	fig|667121.3.peg.3307	fig|500638.4.peg.3130	fig|636.4.peg.743
ETAE_0023		Unknown	conserved hypothetical protein	fig|718251.4.peg.23	fig|667120.3.peg.4033	fig|67780.5.peg.203	fig|634503.5.peg.23	fig|667121.3.peg.3305	fig|500638.4.peg.3128	fig|636.4.peg.745
ETAE_0024		Unknown	conserved hypothetical protein	fig|718251.4.peg.24	fig|667120.3.peg.4034	fig|67780.5.peg.204	fig|634503.5.peg.24	fig|667121.3.peg.3304	fig|500638.4.peg.3127	fig|636.4.peg.746
ETAE_0025	uraA	CytoplasmicMembrane	putative xanthine/uracil permeases	fig|718251.4.peg.25	fig|667120.3.peg.4035	fig|67780.5.peg.205	fig|634503.5.peg.25	fig|667121.3.peg.3303	fig|500638.4.peg.3126	fig|636.4.peg.747
ETAE_0026	gltS	CytoplasmicMembrane	Na+/glutamate symporter	fig|718251.4.peg.26	fig|667120.3.peg.4036	fig|67780.5.peg.206	fig|634503.5.peg.26	fig|667121.3.peg.3302	fig|500638.4.peg.3125	fig|636.4.peg.748
ETAE_0027	recG	Unknown	ATP-dependent DNA helicase	fig|718251.4.peg.27	fig|667120.3.peg.4037	fig|67780.5.peg.207	fig|634503.5.peg.27	fig|667121.3.peg.3301	fig|500638.4.peg.3124	fig|636.4.peg.749
ETAE_0028	trmH	Unknown	tRNA (guanosine-2'-O-)-methyltransferase	fig|718251.4.peg.28	fig|667120.3.peg.4038	fig|67780.5.peg.208	fig|634503.5.peg.28	fig|667121.3.peg.3300	fig|500638.4.peg.3123	fig|636.4.peg.750
ETAE_0029	spoT	Cytoplasmic	guanosine polyphosphate pyrophosphohydrolases/synthetases	fig|718251.4.peg.29	fig|667120.3.peg.4039	fig|67780.5.peg.209	fig|634503.5.peg.29	fig|667121.3.peg.3299	fig|500638.4.peg.3122	fig|636.4.peg.751
ETAE_0030	rpoZ	Cytoplasmic	DNA-directed RNA polymerase, subunit omega	fig|718251.4.peg.30	fig|667120.3.peg.4040	fig|67780.5.peg.210	fig|634503.5.peg.30	fig|667121.3.peg.3298	fig|500638.4.peg.3121	fig|636.4.peg.752
ETAE_0031	gmk	Cytoplasmic	guanylate kinase	fig|718251.4.peg.31	fig|667120.3.peg.4041	fig|67780.5.peg.211	fig|634503.5.peg.31	fig|667121.3.peg.3297	fig|500638.4.peg.3120	fig|636.4.peg.753
ETAE_0032		CytoplasmicMembrane	putative membrane protein	fig|718251.4.peg.32	fig|667120.3.peg.4042	fig|67780.5.peg.212	fig|634503.5.peg.32	fig|667121.3.peg.3296	fig|500638.4.peg.3119	fig|636.4.peg.754
ETAE_0060	yicC	Unknown	conserved YicC domain protein	fig|718251.4.peg.33	fig|667120.3.peg.4043	fig|67780.5.peg.364	fig|634503.5.peg.42	fig|667121.3.peg.2347	fig|500638.4.peg.2955	fig|636.4.peg.3456
ETAE_0061	rph	Cytoplasmic	RNase PH	fig|718251.4.peg.34	fig|667120.3.peg.4044	fig|67780.5.peg.365	fig|634503.5.peg.43	fig|667121.3.peg.2346	fig|500638.4.peg.2956	fig|636.4.peg.3455
ETAE_0062	pyrE	Unknown	orotate phosphoribosyltransferase	fig|718251.4.peg.35	fig|667120.3.peg.4045	fig|67780.5.peg.366	fig|634503.5.peg.44	fig|667121.3.peg.2345	fig|500638.4.peg.2957	fig|636.4.peg.3454
ETAE_0063	slmA	Unknown	TetR-family transcriptional regulator	fig|718251.4.peg.36	fig|667120.3.peg.4046	fig|67780.5.peg.367	fig|634503.5.peg.45	fig|667121.3.peg.2344	fig|500638.4.peg.2958	fig|636.4.peg.3453
ETAE_0064	dut	Unknown	deoxyuridine 5'-triphosphate nucleotidohydrolase, dUTP pyrophosphatase (dUTPase)	fig|718251.4.peg.37	fig|667120.3.peg.4047	fig|67780.5.peg.368	fig|634503.5.peg.46	fig|667121.3.peg.2343	fig|500638.4.peg.2959	fig|636.4.peg.3452
ETAE_0065	dfp	Unknown	bifunctional phosphopantothenoylcysteine decarboxylase/phosphopantothenate synthase	fig|718251.4.peg.38	fig|667120.3.peg.4048	fig|67780.5.peg.369	fig|634503.5.peg.47	fig|667121.3.peg.2342	fig|500638.4.peg.2960	fig|636.4.peg.3451
ETAE_0066	radC	Cytoplasmic	DNA repair protein	fig|718251.4.peg.39	fig|667120.3.peg.4049	fig|67780.5.peg.371	fig|634503.5.peg.49	fig|667121.3.peg.2341	fig|500638.4.peg.2961	fig|636.4.peg.3450
ETAE_0067	rpmB	Cytoplasmic	ribosomal protein L28	fig|718251.4.peg.40	fig|667120.3.peg.4050	fig|67780.5.peg.372	fig|634503.5.peg.50	fig|667121.3.peg.2340	fig|500638.4.peg.2962	fig|636.4.peg.3449
ETAE_0068	rpmG	Unknown	ribosomal protein L33	fig|718251.4.peg.41	fig|667120.3.peg.4051	fig|67780.5.peg.373	fig|634503.5.peg.51	fig|667121.3.peg.2339	fig|500638.4.peg.2963	fig|636.4.peg.3448
ETAE_0069	mutM	Unknown	formamidopyrimidine-DNA glycosylase	fig|718251.4.peg.42	fig|667120.3.peg.4052	fig|67780.5.peg.374	fig|634503.5.peg.52	fig|667121.3.peg.2338	fig|500638.4.peg.2964	fig|636.4.peg.3447
ETAE_0070	coaD	Cytoplasmic	phosphopantetheine adenylyltransferase	fig|718251.4.peg.43	fig|667120.3.peg.4053	fig|67780.5.peg.375	fig|634503.5.peg.53	fig|667121.3.peg.2337	fig|500638.4.peg.2965	fig|636.4.peg.3446
ETAE_0071	waaE	Unknown	glycosyltransferases involved in cell wall biogenesis	fig|718251.4.peg.44	fig|667120.3.peg.4054	fig|67780.5.peg.376	fig|634503.5.peg.54	fig|667121.3.peg.2336	fig|500638.4.peg.2966	fig|636.4.peg.3445
ETAE_0072	kdtA	CytoplasmicMembrane	3-deoxy-D-manno-octulosonic-acid transferase	fig|718251.4.peg.45	fig|667120.3.peg.4055	fig|67780.5.peg.377	fig|634503.5.peg.55	fig|667121.3.peg.2335	fig|500638.4.peg.2967	fig|636.4.peg.3444
ETAE_0081	waaC	Cytoplasmic	ADP-heptose:LPS heptosyltransferase I	fig|718251.4.peg.54	fig|667120.3.peg.4064	fig|67780.5.peg.385	fig|634503.5.peg.64	fig|667121.3.peg.2326	fig|500638.4.peg.2976	fig|636.4.peg.3438
ETAE_0082	waaF	Cytoplasmic	ADP-heptose:LPS heptosyltransferase II	fig|718251.4.peg.55	fig|667120.3.peg.4065	fig|67780.5.peg.386	fig|634503.5.peg.65	fig|667121.3.peg.2325	fig|500638.4.peg.2977	fig|636.4.peg.3437
ETAE_0083	rfaD	Unknown	ADP-L-glycero-D-manno-heptose-6-epimerase	fig|718251.4.peg.56	fig|667120.3.peg.4066	fig|67780.5.peg.387	fig|634503.5.peg.66	fig|667121.3.peg.2324	fig|500638.4.peg.2978	fig|636.4.peg.3436
ETAE_0084	kbl	Cytoplasmic	2-amino-3-ketobutyrate coenzyme A ligase	fig|718251.4.peg.57	fig|667120.3.peg.4067	fig|67780.5.peg.388	fig|634503.5.peg.67	fig|667121.3.peg.2323	fig|500638.4.peg.2979	fig|636.4.peg.3435
ETAE_0085	tdh	Cytoplasmic	L-threonine 3-dehydrogenase	fig|718251.4.peg.58	fig|667120.3.peg.4068	fig|67780.5.peg.389	fig|634503.5.peg.68	fig|667121.3.peg.2322	fig|500638.4.peg.2980	fig|636.4.peg.3434
ETAE_0086		Unknown	putative ATPase with chaperone activity	fig|718251.4.peg.59	fig|667120.3.peg.4069	fig|67780.5.peg.390	fig|634503.5.peg.69	fig|667121.3.peg.2321	fig|500638.4.peg.2981	fig|636.4.peg.3433
ETAE_0087		CytoplasmicMembrane	putative major facilitator superfamily MFS_1	fig|718251.4.peg.60	fig|667120.3.peg.4070	fig|67780.5.peg.391	fig|634503.5.peg.70	fig|667121.3.peg.2320	fig|500638.4.peg.2982	fig|636.4.peg.3432
ETAE_0088	ilvG	Unknown	acetolactate synthase 2 catalytic subunit	fig|718251.4.peg.61	fig|667120.3.peg.4071	fig|67780.5.peg.392	fig|634503.5.peg.71	fig|667121.3.peg.2319	fig|500638.4.peg.2983	fig|636.4.peg.3431
ETAE_0089	ilvM	Cytoplasmic	acetolactate synthase (isozyme II), small (regulatory) subunit	fig|718251.4.peg.62	fig|667120.3.peg.4072	fig|67780.5.peg.393	fig|634503.5.peg.72	fig|667121.3.peg.2318	fig|500638.4.peg.2984	fig|636.4.peg.3430
ETAE_0090	ilvE	Unknown	branched-chain amino acid aminotransferase	fig|718251.4.peg.63	fig|667120.3.peg.4073	fig|67780.5.peg.394	fig|634503.5.peg.73	fig|667121.3.peg.2317	fig|500638.4.peg.2985	fig|636.4.peg.3429
ETAE_0091	ilvD	Cytoplasmic	dihydroxyacid dehydratase/phosphogluconate dehydratase	fig|718251.4.peg.64	fig|667120.3.peg.4074	fig|67780.5.peg.395	fig|634503.5.peg.74	fig|667121.3.peg.2316	fig|500638.4.peg.2986	fig|636.4.peg.3428
ETAE_0092	ilvA	Cytoplasmic	threonine dehydratase	fig|718251.4.peg.65	fig|667120.3.peg.4075	fig|67780.5.peg.396	fig|634503.5.peg.75	fig|667121.3.peg.2315	fig|500638.4.peg.2987	fig|636.4.peg.3427
ETAE_0093	ilvY	Cytoplasmic	transcriptional activator	fig|718251.4.peg.66	fig|667120.3.peg.4076	fig|67780.5.peg.397	fig|634503.5.peg.76	fig|667121.3.peg.2314	fig|500638.4.peg.2988	fig|636.4.peg.3426
ETAE_0094	ilvC	Unknown	ketol-acid reductoisomerase	fig|718251.4.peg.67	fig|667120.3.peg.4077	fig|67780.5.peg.398	fig|634503.5.peg.77	fig|667121.3.peg.2312	fig|500638.4.peg.2990	fig|636.4.peg.3424
ETAE_0096	rep	Cytoplasmic	ATP-dependent DNA helicase	fig|718251.4.peg.69	fig|667120.3.peg.4079	fig|67780.5.peg.401	fig|634503.5.peg.80	fig|667121.3.peg.2310	fig|500638.4.peg.2992	fig|636.4.peg.3422
ETAE_0097	gppA	Cytoplasmic	guanosine pentaphosphate phosphohydrolase	fig|718251.4.peg.70	fig|667120.3.peg.4080	fig|67780.5.peg.402	fig|634503.5.peg.81	fig|667121.3.peg.2309	fig|500638.4.peg.2993	fig|636.4.peg.3421
ETAE_0098	rhlB	Unknown	ATP-dependent RNA helicase	fig|718251.4.peg.71	fig|667120.3.peg.4081	fig|67780.5.peg.403	fig|634503.5.peg.82	fig|667121.3.peg.2308	fig|500638.4.peg.2994	fig|636.4.peg.3420
ETAE_0099	trxA	Cytoplasmic	thioredoxin domain-containing protein	fig|718251.4.peg.72	fig|667120.3.peg.4082	fig|67780.5.peg.404	fig|634503.5.peg.83	fig|667121.3.peg.2307	fig|500638.4.peg.2995	fig|636.4.peg.3419
ETAE_0100	rho	Cytoplasmic	transcription termination factor	fig|718251.4.peg.73	fig|667120.3.peg.4083	fig|67780.5.peg.405	fig|634503.5.peg.84	fig|667121.3.peg.2306	fig|500638.4.peg.2996	fig|636.4.peg.3418
ETAE_0101	rfe	CytoplasmicMembrane	UDP-N-acetylmuramyl pentapeptide phosphotransferase	fig|718251.4.peg.74	fig|667120.3.peg.4084	fig|67780.5.peg.406	fig|634503.5.peg.85	fig|667121.3.peg.2305	fig|500638.4.peg.2997	fig|636.4.peg.3417
ETAE_0102	wzzE	CytoplasmicMembrane	lipopolysaccharide biosynthesis protein	fig|718251.4.peg.75	fig|667120.3.peg.4085	fig|67780.5.peg.407	fig|634503.5.peg.86	fig|667121.3.peg.2304	fig|500638.4.peg.2998	fig|636.4.peg.3416
ETAE_0103	wecB	Cytoplasmic	UDP-N-acetylglucosamine 2-epimerase	fig|718251.4.peg.76	fig|667120.3.peg.4086	fig|67780.5.peg.408	fig|634503.5.peg.87	fig|667121.3.peg.2303	fig|500638.4.peg.2999	fig|636.4.peg.3415
ETAE_0105	rfbB	Unknown	dTDP-D-glucose 4,6-dehydratase	fig|718251.4.peg.78	fig|667120.3.peg.4088	fig|67780.5.peg.410	fig|634503.5.peg.89	fig|667121.3.peg.2301	fig|500638.4.peg.2265	fig|636.4.peg.3413
ETAE_0106	rfbA	Unknown	glucose-1-phosphate thymidylyltransferase	fig|718251.4.peg.79	fig|667120.3.peg.4089	fig|67780.5.peg.411	fig|634503.5.peg.90	fig|667121.3.peg.1281	fig|500638.4.peg.2267	fig|636.4.peg.3412
ETAE_0107	wecD	Unknown	TDP-D-fucosamine acetyltransferase	fig|718251.4.peg.80	fig|667120.3.peg.4090	fig|67780.5.peg.412	fig|634503.5.peg.91	fig|667121.3.peg.1280	fig|500638.4.peg.3003	fig|636.4.peg.3411
ETAE_0108	wecE	Unknown	TDP-4-oxo-6-deoxy-D-glucose transaminase	fig|718251.4.peg.81	fig|667120.3.peg.4091	fig|67780.5.peg.413	fig|634503.5.peg.92	fig|667121.3.peg.1279	fig|500638.4.peg.3004	fig|636.4.peg.3410
ETAE_0109	wzxE	CytoplasmicMembrane	membrane protein involved in the export of O-antigen and teichoic acid	fig|718251.4.peg.82	fig|667120.3.peg.4092	fig|67780.5.peg.414	fig|634503.5.peg.93	fig|667121.3.peg.1278	fig|500638.4.peg.3005	fig|636.4.peg.3409
ETAE_0110	wecF	Unknown	4-alpha-L-fucosyltransferase	fig|718251.4.peg.83	fig|667120.3.peg.4093	fig|67780.5.peg.415	fig|634503.5.peg.94	fig|667121.3.peg.1277	fig|500638.4.peg.3006	fig|636.4.peg.3408
ETAE_0111	wzyE	CytoplasmicMembrane	putative enterobacterial common antigen polymerase	fig|718251.4.peg.84	fig|667120.3.peg.4094	fig|67780.5.peg.416	fig|634503.5.peg.95	fig|667121.3.peg.1276	fig|500638.4.peg.3007	fig|636.4.peg.3407
ETAE_0112	wecG	Unknown	UDP-N-acetyl-D-mannosaminuronic acid transferase	fig|718251.4.peg.85	fig|667120.3.peg.4095	fig|67780.5.peg.417	fig|634503.5.peg.96	fig|667121.3.peg.1275	fig|500638.4.peg.3008	fig|636.4.peg.3406
ETAE_0115	hemY	Cytoplasmic	uncharacterized enzyme of heme biosynthesis	fig|718251.4.peg.87	fig|667120.3.peg.4097	fig|67780.5.peg.418	fig|634503.5.peg.97	fig|667121.3.peg.2839	fig|500638.4.peg.3010	fig|636.4.peg.3404
ETAE_0116	hemX	Unknown	putative uroporphyrinogen III C-methyltransferase	fig|718251.4.peg.88	fig|667120.3.peg.4098	fig|67780.5.peg.419	fig|634503.5.peg.98	fig|667121.3.peg.2838	fig|500638.4.peg.3011	fig|636.4.peg.3403
ETAE_0117	hemD	Unknown	uroporphyrinogen-III synthase	fig|718251.4.peg.89	fig|667120.3.peg.4099	fig|67780.5.peg.420	fig|634503.5.peg.99	fig|667121.3.peg.2837	fig|500638.4.peg.3012	fig|636.4.peg.3402
ETAE_0118	hemC	Cytoplasmic	porphobilinogen deaminase	fig|718251.4.peg.90	fig|667120.3.peg.4100	fig|67780.5.peg.421	fig|634503.5.peg.100	fig|667121.3.peg.2836	fig|500638.4.peg.3014	fig|636.4.peg.3401
ETAE_0119	cyaA	Cytoplasmic	adenylate cyclase	fig|718251.4.peg.91	fig|667120.3.peg.4101	fig|67780.5.peg.422	fig|634503.5.peg.101	fig|667121.3.peg.2835	fig|500638.4.peg.3015	fig|636.4.peg.3400
ETAE_0120	cyaY	Cytoplasmic	frataxin-like protein	fig|718251.4.peg.92	fig|667120.3.peg.4102	fig|67780.5.peg.423	fig|634503.5.peg.102	fig|667121.3.peg.2834	fig|500638.4.peg.3016	fig|636.4.peg.3399
ETAE_0122	dapF	Cytoplasmic	diaminopimelate epimerase	fig|718251.4.peg.94	fig|667120.3.peg.4104	fig|67780.5.peg.425	fig|634503.5.peg.104	fig|667121.3.peg.2832	fig|500638.4.peg.3018	fig|636.4.peg.3397
ETAE_0123		Unknown	conserved hypothetical protein	fig|718251.4.peg.95	fig|667120.3.peg.4105	fig|67780.5.peg.426	fig|634503.5.peg.105	fig|667121.3.peg.2831	fig|500638.4.peg.3019	fig|636.4.peg.3396
ETAE_0124	xerC	Unknown	site-specific recombinase	fig|718251.4.peg.96	fig|667120.3.peg.4106	fig|67780.5.peg.427	fig|634503.5.peg.106	fig|667121.3.peg.2830	fig|500638.4.peg.3020	fig|636.4.peg.3395
ETAE_0125		Unknown	hypothetical protein	fig|718251.4.peg.97	fig|667120.3.peg.4107	fig|67780.5.peg.428	fig|634503.5.peg.107	fig|667121.3.peg.2829	fig|500638.4.peg.3021	fig|636.4.peg.3394
ETAE_0126	uvrD	Cytoplasmic	DNA-dependent helicase II	fig|718251.4.peg.98	fig|667120.3.peg.4108	fig|67780.5.peg.429	fig|634503.5.peg.108	fig|667121.3.peg.2828	fig|500638.4.peg.3022	fig|636.4.peg.3393
ETAE_0127	corA	Cytoplasmic	metal ion transporter, MIT family	fig|718251.4.peg.99	fig|667120.3.peg.4109	fig|67780.5.peg.430	fig|634503.5.peg.109	fig|667121.3.peg.2827	fig|500638.4.peg.3023	fig|636.4.peg.3392
ETAE_0128		CytoplasmicMembrane	hypothetical protein	fig|718251.4.peg.100	fig|667120.3.peg.4110	fig|67780.5.peg.431	fig|634503.5.peg.110	fig|667121.3.peg.2826	fig|500638.4.peg.3024	fig|636.4.peg.3391
ETAE_0129	rarD	CytoplasmicMembrane	putative chloramphenical resistance permease	fig|718251.4.peg.101	fig|667120.3.peg.4111	fig|67780.5.peg.432	fig|634503.5.peg.111	fig|667121.3.peg.2825	fig|500638.4.peg.3025	fig|636.4.peg.3390
ETAE_0130	pldA	OuterMembrane	outer membrane phospholipase A	fig|718251.4.peg.102	fig|667120.3.peg.4112	fig|67780.5.peg.433	fig|634503.5.peg.112	fig|667121.3.peg.2824	fig|500638.4.peg.3026	fig|636.4.peg.3389
ETAE_0131	recQ	Cytoplasmic	ATP-dependent DNA helicase	fig|718251.4.peg.103	fig|667120.3.peg.4113	fig|67780.5.peg.434	fig|634503.5.peg.113	fig|667121.3.peg.2823	fig|500638.4.peg.3027	fig|636.4.peg.3388
ETAE_0134	gntU	CytoplasmicMembrane	gluconate transporter, low affinity GNT 1 system	fig|718251.4.peg.106	fig|667120.3.peg.4117	fig|67780.5.peg.436	fig|634503.5.peg.115	fig|667121.3.peg.2820	fig|500638.4.peg.3029	fig|636.4.peg.3386
ETAE_0135	gntK	Unknown	gluconate kinase 1	fig|718251.4.peg.107	fig|667120.3.peg.4118	fig|67780.5.peg.437	fig|634503.5.peg.116	fig|667121.3.peg.2819	fig|500638.4.peg.3030	fig|636.4.peg.3385
ETAE_0136	gntR	Cytoplasmic	transcriptional regulator	fig|718251.4.peg.108	fig|667120.3.peg.4119	fig|67780.5.peg.438	fig|634503.5.peg.117	fig|667121.3.peg.2558	fig|500638.4.peg.3031	fig|636.4.peg.3384
ETAE_0137	zntA	CytoplasmicMembrane	zinc/cadmium/mercury/lead-transporting ATPase	fig|718251.4.peg.109	fig|667120.3.peg.4120	fig|67780.5.peg.439	fig|634503.5.peg.118	fig|667121.3.peg.2557	fig|500638.4.peg.3032	fig|636.4.peg.3383
ETAE_0138		Unknown	conserved hypothetical protein	fig|718251.4.peg.110	fig|667120.3.peg.4121	fig|67780.5.peg.440	fig|634503.5.peg.119	fig|667121.3.peg.2556	fig|500638.4.peg.3033	fig|636.4.peg.3382
ETAE_0139		OuterMembrane	putative outer membrane protein	fig|718251.4.peg.111	fig|667120.3.peg.4122	fig|67780.5.peg.441	fig|634503.5.peg.120	fig|667121.3.peg.2555	fig|500638.4.peg.3034	fig|636.4.peg.3381
ETAE_0140		OuterMembrane	hypothetical protein	fig|718251.4.peg.112	fig|667120.3.peg.4123	fig|67780.5.peg.442	fig|634503.5.peg.121	fig|667121.3.peg.2554	fig|500638.4.peg.3035	fig|636.4.peg.3380
ETAE_0141		CytoplasmicMembrane	permeases of the drug/metabolite transporter (DMT) superfamily	fig|718251.4.peg.113	fig|667120.3.peg.4124	fig|67780.5.peg.443	fig|634503.5.peg.122	fig|667121.3.peg.2553	fig|500638.4.peg.3036	fig|636.4.peg.3379
ETAE_0142	metE	Cytoplasmic	5-methyltetrahydropteroyltriglutamate--homocysteine methyltransferase	fig|718251.4.peg.115	fig|667120.3.peg.4126	fig|67780.5.peg.445	fig|634503.5.peg.124	fig|667121.3.peg.2551	fig|500638.4.peg.3038	fig|636.4.peg.3376
ETAE_0143	udp	Cytoplasmic	uridine phosphorylase	fig|718251.4.peg.116	fig|667120.3.peg.4127	fig|67780.5.peg.446	fig|634503.5.peg.125	fig|667121.3.peg.2550	fig|500638.4.peg.3039	fig|636.4.peg.3375
ETAE_0145		CytoplasmicMembrane	uncharacterized membrane-associated protein	fig|718251.4.peg.118	fig|667120.3.peg.4129	fig|67780.5.peg.451	fig|634503.5.peg.130	fig|667121.3.peg.629	fig|500638.4.peg.3041	fig|636.4.peg.3373
ETAE_0146	rumC	Unknown	putative DNA recombination protein	fig|718251.4.peg.119	fig|667120.3.peg.4130	fig|67780.5.peg.452	fig|634503.5.peg.131	fig|667121.3.peg.628	fig|500638.4.peg.3042	fig|636.4.peg.3372
ETAE_0147	ubiE	Unknown	ubiquinone/menaquinone biosynthesis methyltransferase	fig|718251.4.peg.120	fig|667120.3.peg.4131	fig|67780.5.peg.453	fig|634503.5.peg.132	fig|667121.3.peg.627	fig|500638.4.peg.3043	fig|636.4.peg.3371
ETAE_0148		Cytoplasmic	hypothetical protein	fig|718251.4.peg.121	fig|667120.3.peg.4132	fig|67780.5.peg.454	fig|634503.5.peg.133	fig|667121.3.peg.626	fig|500638.4.peg.3044	fig|636.4.peg.3370
ETAE_0149	ubiB	CytoplasmicMembrane	putative ubiquinone biosynthesis protein	fig|718251.4.peg.122	fig|667120.3.peg.4133	fig|67780.5.peg.455	fig|634503.5.peg.134	fig|667121.3.peg.625	fig|500638.4.peg.3045	fig|636.4.peg.3369
ETAE_0150	tatA	Unknown	Sec-independent protein translocase	fig|718251.4.peg.123	fig|667120.3.peg.4134	fig|67780.5.peg.456	fig|634503.5.peg.135	fig|667121.3.peg.624	fig|500638.4.peg.3046	fig|636.4.peg.3368
ETAE_0152	tatC	CytoplasmicMembrane	twin arginine-targeting protein translocase	fig|718251.4.peg.125	fig|667120.3.peg.4136	fig|67780.5.peg.458	fig|634503.5.peg.137	fig|667121.3.peg.622	fig|500638.4.peg.3048	fig|636.4.peg.3366
ETAE_0153	tatD	Unknown	deoxyribonuclease	fig|718251.4.peg.126	fig|667120.3.peg.4137	fig|67780.5.peg.459	fig|634503.5.peg.138	fig|667121.3.peg.621	fig|500638.4.peg.3049	fig|636.4.peg.3365
ETAE_0154	hemB	Cytoplasmic	delta-aminolevulinic acid dehydratase	fig|718251.4.peg.127	fig|667120.3.peg.4138	fig|67780.5.peg.460	fig|634503.5.peg.139	fig|667121.3.peg.620	fig|500638.4.peg.3050	fig|636.4.peg.3364
ETAE_0155	rfaH	Cytoplasmic	transcriptional activator	fig|718251.4.peg.128	fig|667120.3.peg.4139	fig|67780.5.peg.461	fig|634503.5.peg.140	fig|667121.3.peg.619	fig|500638.4.peg.3051	fig|636.4.peg.3363
ETAE_0156	pepE	Cytoplasmic	peptidase E	fig|718251.4.peg.129	fig|667120.3.peg.4140	fig|67780.5.peg.462	fig|634503.5.peg.141	fig|667121.3.peg.617	fig|500638.4.peg.3053	fig|636.4.peg.3362
ETAE_0158	fre	Unknown	FMN reductase	fig|718251.4.peg.131	fig|667120.3.peg.4142	fig|67780.5.peg.464	fig|634503.5.peg.143	fig|667121.3.peg.615	fig|500638.4.peg.3055	fig|636.4.peg.3360
ETAE_0159	pepQ	Cytoplasmic	proline dipeptidase	fig|718251.4.peg.132	fig|667120.3.peg.4143	fig|67780.5.peg.465	fig|634503.5.peg.144	fig|667121.3.peg.614	fig|500638.4.peg.3056	fig|636.4.peg.3359
ETAE_0160		Unknown	hypothetical protein	fig|718251.4.peg.133	fig|667120.3.peg.4144	fig|67780.5.peg.466	fig|634503.5.peg.145	fig|667121.3.peg.613	fig|500638.4.peg.3057	fig|636.4.peg.3358
ETAE_0161	trkH	CytoplasmicMembrane	Trk-type K+ transport systems, membrane components	fig|718251.4.peg.134	fig|667120.3.peg.4145	fig|67780.5.peg.467	fig|634503.5.peg.146	fig|667121.3.peg.612	fig|500638.4.peg.3058	fig|636.4.peg.3357
ETAE_0162	hemG	Unknown	protoporphyrinogen oxidase	fig|718251.4.peg.135	fig|667120.3.peg.4146	fig|67780.5.peg.468	fig|634503.5.peg.147	fig|667121.3.peg.611	fig|500638.4.peg.3059	fig|636.4.peg.3356
ETAE_0165	murB	Unknown	UDP-N-acetylenolpyruvoylglucosamine reductase	fig|718251.4.peg.139	fig|667120.3.peg.65	fig|67780.5.peg.513	fig|634503.5.peg.148	fig|667121.3.peg.307	fig|500638.4.peg.22	fig|636.4.peg.1832
ETAE_0166	birA	Cytoplasmic	biotin--protein ligase	fig|718251.4.peg.140	fig|667120.3.peg.64	fig|67780.5.peg.514	fig|634503.5.peg.149	fig|667121.3.peg.306	fig|500638.4.peg.21	fig|636.4.peg.1831
ETAE_0167	coaA	Cytoplasmic	panthothenate kinase	fig|718251.4.peg.141	fig|667120.3.peg.63	fig|67780.5.peg.515	fig|634503.5.peg.150	fig|667121.3.peg.305	fig|500638.4.peg.20	fig|636.4.peg.1830
ETAE_0170	secE	CytoplasmicMembrane	preprotein translocase subunit SecE	fig|718251.4.peg.144	fig|667120.3.peg.46	fig|67780.5.peg.794	fig|634503.5.peg.152	fig|667121.3.peg.539	fig|500638.4.peg.17	fig|636.4.peg.1860
ETAE_0171	nusG	Cytoplasmic	transcription antiterminator	fig|718251.4.peg.145	fig|667120.3.peg.47	fig|67780.5.peg.793	fig|634503.5.peg.153	fig|667121.3.peg.538	fig|500638.4.peg.16	fig|636.4.peg.1861
ETAE_0172	rplK	Unknown	50S ribosomal protein L11	fig|718251.4.peg.146	fig|667120.3.peg.48	fig|67780.5.peg.792	fig|634503.5.peg.154	fig|667121.3.peg.537	fig|500638.4.peg.15	fig|636.4.peg.1862
ETAE_0173	rplA	Unknown	50S ribosomal protein L1	fig|718251.4.peg.147	fig|667120.3.peg.49	fig|67780.5.peg.791	fig|634503.5.peg.155	fig|667121.3.peg.536	fig|500638.4.peg.14	fig|636.4.peg.1863
ETAE_0174	rplJ	Unknown	50S ribosomal protein L10	fig|718251.4.peg.148	fig|667120.3.peg.50	fig|67780.5.peg.790	fig|634503.5.peg.156	fig|667121.3.peg.535	fig|500638.4.peg.13	fig|636.4.peg.1864
ETAE_0175	rpoB	Cytoplasmic	DNA-directed RNA polymerase, beta subunit/140 kD subunit	fig|718251.4.peg.150	fig|667120.3.peg.52	fig|67780.5.peg.788	fig|634503.5.peg.158	fig|667121.3.peg.533	fig|500638.4.peg.11	fig|636.4.peg.1866
ETAE_0176	rpoC	Cytoplasmic	DNA-directed RNA polymerase, beta' subunit/160 kD subunit	fig|718251.4.peg.151	fig|667120.3.peg.53	fig|67780.5.peg.787	fig|634503.5.peg.159	fig|667121.3.peg.532	fig|500638.4.peg.10	fig|636.4.peg.1867
ETAE_0178	thiC	Cytoplasmic	thiamine biosynthesis protein	fig|718251.4.peg.153	fig|667120.3.peg.54	fig|67780.5.peg.785	fig|634503.5.peg.161	fig|667121.3.peg.531	fig|500638.4.peg.9	fig|636.4.peg.1868
ETAE_0179	nudC	Cytoplasmic	NADH pyrophosphatase	fig|718251.4.peg.154	fig|667120.3.peg.55	fig|67780.5.peg.784	fig|634503.5.peg.162	fig|667121.3.peg.530	fig|500638.4.peg.8	fig|636.4.peg.1869
ETAE_0180	hemE	Unknown	uroporphyrinogen decarboxylase	fig|718251.4.peg.155	fig|667120.3.peg.56	fig|67780.5.peg.783	fig|634503.5.peg.163	fig|667121.3.peg.529	fig|500638.4.peg.7	fig|636.4.peg.1870
ETAE_0181		Unknown	hypothetical protein	fig|718251.4.peg.156	fig|667120.3.peg.57	fig|67780.5.peg.782	fig|634503.5.peg.164	fig|667121.3.peg.528	fig|500638.4.peg.6	fig|636.4.peg.1871
ETAE_0182		Cytoplasmic	hypothetical protein	fig|718251.4.peg.157	fig|667120.3.peg.58	fig|67780.5.peg.781	fig|634503.5.peg.165	fig|667121.3.peg.527	fig|500638.4.peg.5	fig|636.4.peg.1872
ETAE_0183	hupA	Unknown	transcriptional regulator HU subunit alpha	fig|718251.4.peg.158	fig|667120.3.peg.59	fig|67780.5.peg.780	fig|634503.5.peg.166	fig|667121.3.peg.526	fig|500638.4.peg.4	fig|636.4.peg.1873
ETAE_0184		Unknown	hypothetical protein	fig|718251.4.peg.159	fig|667120.3.peg.60	fig|67780.5.peg.779	fig|634503.5.peg.167	fig|667121.3.peg.525	fig|500638.4.peg.3	fig|636.4.peg.1874
ETAE_0185	purD	Unknown	phosphoribosylamine-glycine ligase	fig|718251.4.peg.160	fig|667120.3.peg.61	fig|67780.5.peg.778	fig|634503.5.peg.168	fig|667121.3.peg.524	fig|500638.4.peg.2	fig|636.4.peg.1875
ETAE_0186	purH	Cytoplasmic	bifunctional phosphoribosylaminoimidazolecarboxamide formyltransferase/IMP cyclohydrolase	fig|718251.4.peg.161	fig|667120.3.peg.62	fig|67780.5.peg.777	fig|634503.5.peg.169	fig|667121.3.peg.523	fig|500638.4.peg.1	fig|636.4.peg.1876
ETAE_0188	acs	Cytoplasmic	acyl-coenzyme A synthetases/AMP-(fatty) acid ligases	fig|718251.4.peg.163	fig|667120.3.peg.789	fig|67780.5.peg.49	fig|634503.5.peg.172	fig|667121.3.peg.646	fig|500638.4.peg.92	fig|636.4.peg.1529
ETAE_0191	tolC	OuterMembrane	outer membrane protein	fig|718251.4.peg.165	fig|667120.3.peg.792	fig|67780.5.peg.54	fig|634503.5.peg.176	fig|667121.3.peg.643	fig|500638.4.peg.95	fig|636.4.peg.1532
ETAE_0192	nudF	Cytoplasmic	ADP-ribose pyrophosphatase NudF	fig|718251.4.peg.166	fig|667120.3.peg.793	fig|67780.5.peg.55	fig|634503.5.peg.177	fig|667121.3.peg.642	fig|500638.4.peg.96	fig|636.4.peg.1533
ETAE_0193	icc	Cytoplasmic	cyclic 3',5'-adenosine monophosphate phosphodiesterase	fig|718251.4.peg.167	fig|667120.3.peg.795	fig|67780.5.peg.57	fig|634503.5.peg.179	fig|667121.3.peg.641	fig|500638.4.peg.97	fig|636.4.peg.1534
ETAE_0194	yqiA	Unknown	esterase	fig|718251.4.peg.168	fig|667120.3.peg.796	fig|67780.5.peg.58	fig|634503.5.peg.180	fig|667121.3.peg.640	fig|500638.4.peg.98	fig|636.4.peg.1535
ETAE_0196	parE	Cytoplasmic	DNA topoisomerase IV subunit B	fig|718251.4.peg.170	fig|667120.3.peg.797	fig|67780.5.peg.59	fig|634503.5.peg.181	fig|667121.3.peg.639	fig|500638.4.peg.99	fig|636.4.peg.1536
ETAE_0197	parC	Cytoplasmic	DNA topoisomerase IV subunit A	fig|718251.4.peg.171	fig|667120.3.peg.798	fig|67780.5.peg.60	fig|634503.5.peg.182	fig|667121.3.peg.638	fig|500638.4.peg.100	fig|636.4.peg.1537
ETAE_0198	plsC	Unknown	1-acyl-sn-glycerol-3-phosphate acyltransferase	fig|718251.4.peg.172	fig|667120.3.peg.799	fig|67780.5.peg.61	fig|634503.5.peg.183	fig|667121.3.peg.637	fig|500638.4.peg.101	fig|636.4.peg.1538
ETAE_0199	sufI	Periplasmic	repressor protein for FtsI	fig|718251.4.peg.173	fig|667120.3.peg.800	fig|67780.5.peg.62	fig|634503.5.peg.184	fig|667121.3.peg.636	fig|500638.4.peg.102	fig|636.4.peg.1539
ETAE_0200	metH	Cytoplasmic	12-dependent methionine synthase	fig|718251.4.peg.174	fig|667120.3.peg.802	fig|67780.5.peg.63	fig|634503.5.peg.185	fig|667121.3.peg.2505	fig|500638.4.peg.131	fig|636.4.peg.1540
ETAE_0204	pgi	Cytoplasmic	glucose-6-phosphate isomerase	fig|718251.4.peg.178	fig|667120.3.peg.805	fig|67780.5.peg.66	fig|634503.5.peg.189	fig|667121.3.peg.2502	fig|500638.4.peg.135	fig|636.4.peg.1543
ETAE_0205		CytoplasmicMembrane	putative Na+/H+-dicarboxylate symporters	fig|718251.4.peg.179	fig|667120.3.peg.806	fig|67780.5.peg.67	fig|634503.5.peg.190	fig|667121.3.peg.2501	fig|500638.4.peg.136	fig|636.4.peg.1544
ETAE_0207	psiE	CytoplasmicMembrane	phosphate-starvation-inducible protein	fig|718251.4.peg.181	fig|667120.3.peg.807	fig|67780.5.peg.69	fig|634503.5.peg.192	fig|667121.3.peg.2500	fig|500638.4.peg.137	fig|636.4.peg.1545
ETAE_0208	malG	CytoplasmicMembrane	ABC-type maltose transport systems, permease component	fig|718251.4.peg.182	fig|667120.3.peg.808	fig|67780.5.peg.70	fig|634503.5.peg.193	fig|667121.3.peg.2499	fig|500638.4.peg.138	fig|636.4.peg.1546
ETAE_0209	malF	CytoplasmicMembrane	ABC-type sugar transport systems, permease component	fig|718251.4.peg.183	fig|667120.3.peg.809	fig|67780.5.peg.71	fig|634503.5.peg.194	fig|667121.3.peg.2498	fig|500638.4.peg.139	fig|636.4.peg.1547
ETAE_0210	malE	Periplasmic	maltose ABC transporter periplasmic protein	fig|718251.4.peg.184	fig|667120.3.peg.810	fig|67780.5.peg.72	fig|634503.5.peg.195	fig|667121.3.peg.2497	fig|500638.4.peg.140	fig|636.4.peg.1548
ETAE_0213	malK	CytoplasmicMembrane	maltose/maltodextrin transporter ATP-binding protein	fig|718251.4.peg.186	fig|667120.3.peg.812	fig|67780.5.peg.75	fig|634503.5.peg.198	fig|667121.3.peg.2496	fig|500638.4.peg.141	fig|636.4.peg.1549
ETAE_0214	lamB	OuterMembrane	maltoporin	fig|718251.4.peg.187	fig|667120.3.peg.813	fig|67780.5.peg.76	fig|634503.5.peg.199	fig|667121.3.peg.2495	fig|500638.4.peg.142	fig|636.4.peg.1550
ETAE_0215	malM	Periplasmic	maltose regulon periplasmic protein	fig|718251.4.peg.188	fig|667120.3.peg.814	fig|67780.5.peg.77	fig|634503.5.peg.200	fig|667121.3.peg.2494	fig|500638.4.peg.143	fig|636.4.peg.1551
ETAE_0216	ubiC	Cytoplasmic	chorismate pyruvate lyase	fig|718251.4.peg.189	fig|667120.3.peg.815	fig|67780.5.peg.78	fig|634503.5.peg.201	fig|667121.3.peg.2493	fig|500638.4.peg.144	fig|636.4.peg.1552
ETAE_0217	ubiA	CytoplasmicMembrane	4-hydroxybenzoate polyprenyltransferase	fig|718251.4.peg.190	fig|667120.3.peg.816	fig|67780.5.peg.79	fig|634503.5.peg.202	fig|667121.3.peg.2492	fig|500638.4.peg.145	fig|636.4.peg.1553
ETAE_0218		CytoplasmicMembrane	putative major facilitator superfamily MFS_1	fig|718251.4.peg.191	fig|667120.3.peg.817	fig|67780.5.peg.80	fig|634503.5.peg.203	fig|667121.3.peg.2491	fig|500638.4.peg.146	fig|636.4.peg.1554
ETAE_0219	plsB	Cytoplasmic	glycerol-3-phosphate O-acyltransferase	fig|718251.4.peg.192	fig|667120.3.peg.818	fig|67780.5.peg.81	fig|634503.5.peg.204	fig|667121.3.peg.2490	fig|500638.4.peg.147	fig|636.4.peg.1555
ETAE_0220	dgkA	CytoplasmicMembrane	diacylglycerol kinase	fig|718251.4.peg.193	fig|667120.3.peg.819	fig|67780.5.peg.82	fig|634503.5.peg.205	fig|667121.3.peg.2489	fig|500638.4.peg.148	fig|636.4.peg.1556
ETAE_0221	citT	CytoplasmicMembrane	citrate carrier/transporter	fig|718251.4.peg.194	fig|667120.3.peg.820	fig|67780.5.peg.83	fig|634503.5.peg.206	fig|667121.3.peg.2488	fig|500638.4.peg.149	fig|636.4.peg.1557
ETAE_0222	citG	Unknown	triphosphoribosyl-dephospho-CoA synthetase	fig|718251.4.peg.195	fig|667120.3.peg.821	fig|67780.5.peg.84	fig|634503.5.peg.207	fig|667121.3.peg.2487	fig|500638.4.peg.150	fig|636.4.peg.1558
ETAE_0223	citX	Cytoplasmic	2'-(5''-triphosphoribosyl)-3'-dephospho-CoA:apo-citrate lyase	fig|718251.4.peg.196	fig|667120.3.peg.822	fig|67780.5.peg.85	fig|634503.5.peg.208	fig|667121.3.peg.2486	fig|500638.4.peg.151	fig|636.4.peg.1559
ETAE_0225	citE	Cytoplasmic	citrate lyase beta subunit	fig|718251.4.peg.198	fig|667120.3.peg.824	fig|67780.5.peg.88	fig|634503.5.peg.211	fig|667121.3.peg.2484	fig|500638.4.peg.153	fig|636.4.peg.1561
ETAE_0226	citD	Cytoplasmic	citrate lyase, gamma subunit	fig|718251.4.peg.199	fig|667120.3.peg.825	fig|67780.5.peg.89	fig|634503.5.peg.212	fig|667121.3.peg.2483	fig|500638.4.peg.154	fig|636.4.peg.1562
ETAE_0227	citC	Unknown	citrate lyase synthetase	fig|718251.4.peg.200	fig|667120.3.peg.826	fig|67780.5.peg.90	fig|634503.5.peg.213	fig|667121.3.peg.2482	fig|500638.4.peg.155	fig|636.4.peg.1563
ETAE_0228	citA	CytoplasmicMembrane	sensor histidine kinase	fig|718251.4.peg.201	fig|667120.3.peg.827	fig|67780.5.peg.91	fig|634503.5.peg.214	fig|667121.3.peg.2481	fig|500638.4.peg.156	fig|636.4.peg.1564
ETAE_0229	citB	Cytoplasmic	two-component response regulator	fig|718251.4.peg.202	fig|667120.3.peg.828	fig|67780.5.peg.92	fig|634503.5.peg.215	fig|667121.3.peg.2480	fig|500638.4.peg.157	fig|636.4.peg.1565
ETAE_0230	lexA	Cytoplasmic	SOS-response transcriptional repressors (RecA-mediated autopeptidases)	fig|718251.4.peg.203	fig|667120.3.peg.829	fig|67780.5.peg.93	fig|634503.5.peg.216	fig|667121.3.peg.2479	fig|500638.4.peg.158	fig|636.4.peg.1566
ETAE_0231		CytoplasmicMembrane	multidrug resistance protein, MATE family	fig|718251.4.peg.204	fig|667120.3.peg.830	fig|67780.5.peg.94	fig|634503.5.peg.217	fig|667121.3.peg.2478	fig|500638.4.peg.159	fig|636.4.peg.1567
ETAE_0234	dusA	Cytoplasmic	tRNA-dihydrouridine synthase	fig|718251.4.peg.207	fig|667120.3.peg.833	fig|67780.5.peg.97	fig|634503.5.peg.220	fig|667121.3.peg.2475	fig|500638.4.peg.162	fig|636.4.peg.1570
ETAE_0237	dnaB	Cytoplasmic	replicative DNA helicase	fig|718251.4.peg.210	fig|667120.3.peg.835	fig|67780.5.peg.100	fig|634503.5.peg.222	fig|667121.3.peg.2472	fig|500638.4.peg.165	fig|636.4.peg.1573
ETAE_0239	alr	Cytoplasmic	alanine racemase	fig|718251.4.peg.212	fig|667120.3.peg.837	fig|67780.5.peg.102	fig|634503.5.peg.224	fig|667121.3.peg.2471	fig|500638.4.peg.166	fig|636.4.peg.1574
ETAE_0240		Cytoplasmic	putative iron-containing alcohol dehydrogenase	fig|718251.4.peg.213	fig|667120.3.peg.838	fig|67780.5.peg.103	fig|634503.5.peg.225	fig|667121.3.peg.2470	fig|500638.4.peg.167	fig|636.4.peg.1575
ETAE_0243		Unknown	AraC family transcription regulator	fig|718251.4.peg.214	fig|667120.3.peg.839	fig|67780.5.peg.104	fig|634503.5.peg.226	fig|667121.3.peg.2469	fig|500638.4.peg.168	fig|636.4.peg.1576
ETAE_0244		Cytoplasmic	putative prolyl aminopeptidase	fig|718251.4.peg.215	fig|667120.3.peg.840	fig|67780.5.peg.105	fig|634503.5.peg.227	fig|667121.3.peg.114	fig|500638.4.peg.169	fig|636.4.peg.1577
ETAE_0245		OuterMembrane	hypothetical protein	fig|718251.4.peg.216	fig|667120.3.peg.841	fig|67780.5.peg.106	fig|634503.5.peg.228	fig|667121.3.peg.113	fig|500638.4.peg.170	fig|636.4.peg.2042
ETAE_0247	sodC	Periplasmic	copper-zinc superoxide dismutase	fig|718251.4.peg.218	fig|667120.3.peg.843	fig|67780.5.peg.109	fig|634503.5.peg.231	fig|667121.3.peg.111	fig|500638.4.peg.172	fig|636.4.peg.2040
ETAE_0248	narI	CytoplasmicMembrane	nitrate reductase gamma subunit	fig|718251.4.peg.219	fig|667120.3.peg.844	fig|67780.5.peg.110	fig|634503.5.peg.232	fig|667121.3.peg.110	fig|500638.4.peg.173	fig|636.4.peg.2039
ETAE_0249	narJ	Cytoplasmic	nitrate reductase delta subunit	fig|718251.4.peg.220	fig|667120.3.peg.845	fig|67780.5.peg.111	fig|634503.5.peg.233	fig|667121.3.peg.109	fig|500638.4.peg.174	fig|636.4.peg.2038
ETAE_0250	narH	Cytoplasmic	nitrate reductase beta subunit	fig|718251.4.peg.221	fig|667120.3.peg.846	fig|67780.5.peg.112	fig|634503.5.peg.234	fig|667121.3.peg.108	fig|500638.4.peg.175	fig|636.4.peg.2037
ETAE_0251	narG	Unknown	nitrate reductase alpha subunit	fig|718251.4.peg.222	fig|667120.3.peg.847	fig|67780.5.peg.113	fig|634503.5.peg.235	fig|667121.3.peg.107	fig|500638.4.peg.176	fig|636.4.peg.2036
ETAE_0252	narK	CytoplasmicMembrane	nitrate/nitrite transporter	fig|718251.4.peg.223	fig|667120.3.peg.848	fig|67780.5.peg.114	fig|634503.5.peg.236	fig|667121.3.peg.106	fig|500638.4.peg.177	fig|636.4.peg.2035
ETAE_0254	ttdT	CytoplasmicMembrane	putative tartrate:succinate antiporter	fig|718251.4.peg.225	fig|667120.3.peg.850	fig|67780.5.peg.117	fig|634503.5.peg.238	fig|667121.3.peg.104	fig|500638.4.peg.178	fig|636.4.peg.2033
ETAE_0262	nikR	Cytoplasmic	nickel responsive regulator	fig|718251.4.peg.230	fig|667120.3.peg.67	fig|67780.5.peg.125	fig|634503.5.peg.248	fig|667121.3.peg.2578	fig|500638.4.peg.186	fig|636.4.peg.3013
ETAE_0263	mltC	Periplasmic	murein transglycosylase C	fig|718251.4.peg.231	fig|667120.3.peg.68	fig|67780.5.peg.126	fig|634503.5.peg.249	fig|667121.3.peg.2577	fig|500638.4.peg.187	fig|636.4.peg.3014
ETAE_0264		Cytoplasmic	putative Fe(2+)-trafficking protein	fig|718251.4.peg.232	fig|667120.3.peg.69	fig|67780.5.peg.127	fig|634503.5.peg.250	fig|667121.3.peg.2576	fig|500638.4.peg.188	fig|636.4.peg.3015
ETAE_0265	mutY	Unknown	A/G-specific adenine glycosylase	fig|718251.4.peg.233	fig|667120.3.peg.70	fig|67780.5.peg.128	fig|634503.5.peg.251	fig|667121.3.peg.2575	fig|500638.4.peg.189	fig|636.4.peg.3016
ETAE_0266	trmB	Unknown	tRNA (guanine-N(7))-methyltransferase	fig|718251.4.peg.234	fig|667120.3.peg.71	fig|67780.5.peg.129	fig|634503.5.peg.252	fig|667121.3.peg.2574	fig|500638.4.peg.190	fig|636.4.peg.3017
ETAE_0267		Cytoplasmic	hypothetical protein	fig|718251.4.peg.235	fig|667120.3.peg.72	fig|67780.5.peg.130	fig|634503.5.peg.253	fig|667121.3.peg.2573	fig|500638.4.peg.191	fig|636.4.peg.3018
ETAE_0268	glsA	Cytoplasmic	glutaminase	fig|718251.4.peg.236	fig|667120.3.peg.73	fig|67780.5.peg.131	fig|634503.5.peg.254	fig|667121.3.peg.2572	fig|500638.4.peg.192	fig|636.4.peg.3019
ETAE_0269		Unknown	conserved hypothetical protein	fig|718251.4.peg.237	fig|667120.3.peg.74	fig|67780.5.peg.132	fig|634503.5.peg.255	fig|667121.3.peg.2571	fig|500638.4.peg.193	fig|636.4.peg.3020
ETAE_0271	hemN	Cytoplasmic	coproporphyrinogen III oxidase and related Fe-S oxidoreductases	fig|718251.4.peg.239	fig|667120.3.peg.76	fig|67780.5.peg.1008	fig|634503.5.peg.258	fig|667121.3.peg.2569	fig|500638.4.peg.195	fig|636.4.peg.3022
ETAE_0272	yggV	Cytoplasmic	putative deoxyribonucleotide triphosphate pyrophosphatase	fig|718251.4.peg.240	fig|667120.3.peg.77	fig|67780.5.peg.1007	fig|634503.5.peg.259	fig|667121.3.peg.2568	fig|500638.4.peg.196	fig|636.4.peg.3023
ETAE_0273		Cytoplasmic	hypothetical protein	fig|718251.4.peg.241	fig|667120.3.peg.78	fig|67780.5.peg.1006	fig|634503.5.peg.260	fig|667121.3.peg.2567	fig|500638.4.peg.197	fig|636.4.peg.3024
ETAE_0274		CytoplasmicMembrane	hypothetical protein	fig|718251.4.peg.242	fig|667120.3.peg.79	fig|67780.5.peg.1005	fig|634503.5.peg.261	fig|667121.3.peg.2566	fig|500638.4.peg.198	fig|636.4.peg.3025
ETAE_0275		Cytoplasmic	hypothetical protein	fig|718251.4.peg.243	fig|667120.3.peg.80	fig|67780.5.peg.1004	fig|634503.5.peg.262	fig|667121.3.peg.2565	fig|500638.4.peg.199	fig|636.4.peg.3026
ETAE_0276	ruvX	Unknown	putative holliday junction resolvase	fig|718251.4.peg.244	fig|667120.3.peg.81	fig|67780.5.peg.1003	fig|634503.5.peg.263	fig|667121.3.peg.2564	fig|500638.4.peg.200	fig|636.4.peg.3027
ETAE_0277		Unknown	conserved hypothetical protein	fig|718251.4.peg.245	fig|667120.3.peg.82	fig|67780.5.peg.1002	fig|634503.5.peg.264	fig|667121.3.peg.2563	fig|500638.4.peg.201	fig|636.4.peg.3028
ETAE_0278	gshB	Unknown	glutathione synthetase	fig|718251.4.peg.246	fig|667120.3.peg.83	fig|67780.5.peg.1001	fig|634503.5.peg.265	fig|667121.3.peg.2562	fig|500638.4.peg.202	fig|636.4.peg.3029
ETAE_0279	rsmE	Cytoplasmic	ribosomal RNA small subunit methyltransferase E	fig|718251.4.peg.247	fig|667120.3.peg.84	fig|67780.5.peg.1000	fig|634503.5.peg.266	fig|667121.3.peg.2561	fig|500638.4.peg.203	fig|636.4.peg.3030
ETAE_0280	endA	Periplasmic	deoxyribonuclease I	fig|718251.4.peg.248	fig|667120.3.peg.85	fig|67780.5.peg.999	fig|634503.5.peg.267	fig|667121.3.peg.2560	fig|500638.4.peg.204	fig|636.4.peg.3031
ETAE_0281		Unknown	conserved hypothetical protein	fig|718251.4.peg.249	fig|667120.3.peg.86	fig|67780.5.peg.998	fig|634503.5.peg.268	fig|667121.3.peg.2559	fig|500638.4.peg.205	fig|636.4.peg.3032
ETAE_0285		Cytoplasmic	hypothetical protein	fig|718251.4.peg.253	fig|667120.3.peg.90	fig|67780.5.peg.995	fig|634503.5.peg.271	fig|667121.3.peg.3231	fig|500638.4.peg.208	fig|636.4.peg.3035
ETAE_0286		Unknown	hypothetical protein	fig|718251.4.peg.254	fig|667120.3.peg.91	fig|67780.5.peg.994	fig|634503.5.peg.272	fig|667121.3.peg.3230	fig|500638.4.peg.209	fig|636.4.peg.3036
ETAE_0295		CytoplasmicMembrane	conserved hypothetical protein	fig|718251.4.peg.263	fig|667120.3.peg.101	fig|67780.5.peg.992	fig|634503.5.peg.274	fig|667121.3.peg.3221	fig|500638.4.peg.218	fig|636.4.peg.3045
ETAE_0296		CytoplasmicMembrane	hypothetical protein	fig|718251.4.peg.264	fig|667120.3.peg.102	fig|67780.5.peg.989	fig|634503.5.peg.276	fig|667121.3.peg.3220	fig|500638.4.peg.219	fig|636.4.peg.3046
ETAE_0298	torA	Periplasmic	trimethylamine-N-oxide reductase	fig|718251.4.peg.266	fig|667120.3.peg.104	fig|67780.5.peg.987	fig|634503.5.peg.278	fig|667121.3.peg.3218	fig|500638.4.peg.221	fig|636.4.peg.3048
ETAE_0299	torC	Periplasmic	nitrate/TMAO reductases, membrane-bound tetraheme cytochrome c subunit	fig|718251.4.peg.267	fig|667120.3.peg.105	fig|67780.5.peg.986	fig|634503.5.peg.279	fig|667121.3.peg.3217	fig|500638.4.peg.222	fig|636.4.peg.3049
ETAE_0300	torR	Cytoplasmic	DNA-binding response regulator in two-component regulatory system	fig|718251.4.peg.268	fig|667120.3.peg.106	fig|67780.5.peg.985	fig|634503.5.peg.280	fig|667121.3.peg.3216	fig|500638.4.peg.223	fig|636.4.peg.3050
ETAE_0301	torT	Periplasmic	periplasmic sensory protein associated with the TorRS two-component regulatory system	fig|718251.4.peg.269	fig|667120.3.peg.107	fig|67780.5.peg.984	fig|634503.5.peg.281	fig|667121.3.peg.3215	fig|500638.4.peg.224	fig|636.4.peg.3051
ETAE_0302	torS	CytoplasmicMembrane	sensor histidine kinase/response regulator	fig|718251.4.peg.270	fig|667120.3.peg.108	fig|67780.5.peg.983	fig|634503.5.peg.282	fig|667121.3.peg.3214	fig|500638.4.peg.225	fig|636.4.peg.3052
ETAE_0306		Unknown	conserved hypothetical protein	fig|718251.4.peg.273	fig|667120.3.peg.120	fig|67780.5.peg.680	fig|634503.5.peg.350	fig|667121.3.peg.871	fig|500638.4.peg.228	fig|636.4.peg.3055
ETAE_0307		Cytoplasmic	putative TetR-family regulatory protein	fig|718251.4.peg.274	fig|667120.3.peg.121	fig|67780.5.peg.681	fig|634503.5.peg.351	fig|667121.3.peg.870	fig|500638.4.peg.229	fig|636.4.peg.3056
ETAE_0308	dsbD	CytoplasmicMembrane	thiol:disulfide interchange protein	fig|718251.4.peg.275	fig|667120.3.peg.122	fig|67780.5.peg.682	fig|634503.5.peg.352	fig|667121.3.peg.869	fig|500638.4.peg.230	fig|636.4.peg.3057
ETAE_0309	cutA	Unknown	divalent-cation tolerance protein	fig|718251.4.peg.276	fig|667120.3.peg.123	fig|67780.5.peg.683	fig|634503.5.peg.353	fig|667121.3.peg.868	fig|500638.4.peg.231	fig|636.4.peg.3058
ETAE_0310	dcuA	CytoplasmicMembrane	anaerobic C4-dicarboxylate transporter	fig|718251.4.peg.277	fig|667120.3.peg.124	fig|67780.5.peg.684	fig|634503.5.peg.354	fig|667121.3.peg.867	fig|500638.4.peg.232	fig|636.4.peg.3059
ETAE_0311	aspA	Cytoplasmic	aspartate ammonia-lyase	fig|718251.4.peg.278	fig|667120.3.peg.125	fig|67780.5.peg.685	fig|634503.5.peg.355	fig|667121.3.peg.866	fig|500638.4.peg.233	fig|636.4.peg.3060
ETAE_0313	groES	Cytoplasmic	co-chaperonin GroES (HSP10)	fig|718251.4.peg.280	fig|667120.3.peg.127	fig|67780.5.peg.687	fig|634503.5.peg.357	fig|667121.3.peg.864	fig|500638.4.peg.235	fig|636.4.peg.3062
ETAE_0314	groEL	Cytoplasmic	chaperonin GroEL (HSP60 family)	fig|718251.4.peg.281	fig|667120.3.peg.128	fig|67780.5.peg.688	fig|634503.5.peg.358	fig|667121.3.peg.863	fig|500638.4.peg.236	fig|636.4.peg.3063
ETAE_0327		Unknown	hypothetical protein	fig|718251.4.peg.290	fig|667120.3.peg.131	fig|67780.5.peg.689	fig|634503.5.peg.359	fig|667121.3.peg.862	fig|500638.4.peg.237	fig|636.4.peg.3064
ETAE_0328		Cytoplasmic	putative transporter	fig|718251.4.peg.291	fig|667120.3.peg.132	fig|67780.5.peg.690	fig|634503.5.peg.360	fig|667121.3.peg.861	fig|500638.4.peg.238	fig|636.4.peg.3065
ETAE_0329	ykgF	Cytoplasmic	putative electron transport protein	fig|718251.4.peg.292	fig|667120.3.peg.133	fig|67780.5.peg.691	fig|634503.5.peg.361	fig|667121.3.peg.860	fig|500638.4.peg.239	fig|636.4.peg.3066
ETAE_0330		Cytoplasmic	conserved hypothetical protein with cysteine-rich domain	fig|718251.4.peg.293	fig|667120.3.peg.134	fig|67780.5.peg.692	fig|634503.5.peg.362	fig|667121.3.peg.859	fig|500638.4.peg.240	fig|636.4.peg.3067
ETAE_0331	lldP	CytoplasmicMembrane	L-lactate permease	fig|718251.4.peg.294	fig|667120.3.peg.135	fig|67780.5.peg.693	fig|634503.5.peg.363	fig|667121.3.peg.858	fig|500638.4.peg.241	fig|636.4.peg.3068
ETAE_0332	efp	Cytoplasmic	translation elongation factor P	fig|718251.4.peg.296	fig|667120.3.peg.137	fig|67780.5.peg.695	fig|634503.5.peg.365	fig|667121.3.peg.856	fig|500638.4.peg.243	fig|636.4.peg.3070
ETAE_0333		Cytoplasmic	hypothetical protein	fig|718251.4.peg.295	fig|667120.3.peg.136	fig|67780.5.peg.694	fig|634503.5.peg.364	fig|667121.3.peg.857	fig|500638.4.peg.242	fig|636.4.peg.3069
ETAE_0335	frdD	CytoplasmicMembrane	fumarate reductase subunit D	fig|718251.4.peg.298	fig|667120.3.peg.139	fig|67780.5.peg.697	fig|634503.5.peg.367	fig|667121.3.peg.363	fig|500638.4.peg.245	fig|636.4.peg.3072
ETAE_0336	frdC	CytoplasmicMembrane	fumarate reductase subunit C	fig|718251.4.peg.299	fig|667120.3.peg.140	fig|67780.5.peg.698	fig|634503.5.peg.368	fig|667121.3.peg.362	fig|500638.4.peg.246	fig|636.4.peg.3073
ETAE_0337	frdB	Cytoplasmic	fumarate reductase iron-sulfur subunit	fig|718251.4.peg.300	fig|667120.3.peg.141	fig|67780.5.peg.699	fig|634503.5.peg.369	fig|667121.3.peg.361	fig|500638.4.peg.247	fig|636.4.peg.3074
ETAE_0338	frdA	Periplasmic	fumarate reductase flavoprotein subunit	fig|718251.4.peg.301	fig|667120.3.peg.142	fig|67780.5.peg.700	fig|634503.5.peg.370	fig|667121.3.peg.360	fig|500638.4.peg.248	fig|636.4.peg.3075
ETAE_0340	poxA	Cytoplasmic	lysyl-tRNA synthetase, class II	fig|718251.4.peg.302	fig|667120.3.peg.143	fig|67780.5.peg.702	fig|634503.5.peg.372	fig|667121.3.peg.359	fig|500638.4.peg.249	fig|636.4.peg.3076
ETAE_0342	psd	Unknown	phosphatidylserine decarboxylase	fig|718251.4.peg.304	fig|667120.3.peg.145	fig|67780.5.peg.705	fig|634503.5.peg.375	fig|667121.3.peg.357	fig|500638.4.peg.251	fig|636.4.peg.3078
ETAE_0343	yjeQ	Cytoplasmic	ribosome-associated GTPase	fig|718251.4.peg.305	fig|667120.3.peg.146	fig|67780.5.peg.706	fig|634503.5.peg.376	fig|667121.3.peg.356	fig|500638.4.peg.252	fig|636.4.peg.3079
ETAE_0344		Cytoplasmic	conserved hypothetical protein	fig|718251.4.peg.306	fig|667120.3.peg.147	fig|67780.5.peg.707	fig|634503.5.peg.377	fig|667121.3.peg.355	fig|500638.4.peg.253	fig|636.4.peg.3080
ETAE_0346		Cytoplasmic	putative 4Fe-4S binding protein	fig|718251.4.peg.307	fig|667120.3.peg.148	fig|67780.5.peg.2994	fig|634503.5.peg.378	fig|667121.3.peg.3072	fig|500638.4.peg.254	fig|636.4.peg.3081
ETAE_0347		Unknown	hypothetical protein	fig|718251.4.peg.308	fig|667120.3.peg.149	fig|67780.5.peg.2995	fig|634503.5.peg.379	fig|667121.3.peg.3071	fig|500638.4.peg.255	fig|636.4.peg.3082
ETAE_0348		Unknown	putative ATPase	fig|718251.4.peg.309	fig|667120.3.peg.150	fig|67780.5.peg.2996	fig|634503.5.peg.380	fig|667121.3.peg.3070	fig|500638.4.peg.256	fig|636.4.peg.3083
ETAE_0349	amiA	Unknown	putative N-acetylmuramoyl-L-alanine amidase	fig|718251.4.peg.310	fig|667120.3.peg.151	fig|67780.5.peg.2997	fig|634503.5.peg.381	fig|667121.3.peg.3069	fig|500638.4.peg.257	fig|636.4.peg.3084
ETAE_0350	mutL	Unknown	DNA mismatch repair enzyme	fig|718251.4.peg.311	fig|667120.3.peg.152	fig|67780.5.peg.2998	fig|634503.5.peg.382	fig|667121.3.peg.3068	fig|500638.4.peg.258	fig|636.4.peg.3085
ETAE_0351	miaA	Cytoplasmic	tRNA delta(2)-isopentenylpyrophosphate transferase	fig|718251.4.peg.312	fig|667120.3.peg.153	fig|67780.5.peg.2999	fig|634503.5.peg.383	fig|667121.3.peg.3067	fig|500638.4.peg.259	fig|636.4.peg.3086
ETAE_0353	hflX	Cytoplasmic	GTP-binding protein	fig|718251.4.peg.314	fig|667120.3.peg.155	fig|67780.5.peg.3001	fig|634503.5.peg.385	fig|667121.3.peg.3065	fig|500638.4.peg.261	fig|636.4.peg.3088
ETAE_0354	hflK	Unknown	FtsH protease regulator	fig|718251.4.peg.315	fig|667120.3.peg.156	fig|67780.5.peg.3002	fig|634503.5.peg.386	fig|667121.3.peg.3064	fig|500638.4.peg.262	fig|636.4.peg.3089
ETAE_0355	hflC	Unknown	FtsH protease regulator	fig|718251.4.peg.316	fig|667120.3.peg.157	fig|67780.5.peg.3003	fig|634503.5.peg.387	fig|667121.3.peg.3063	fig|500638.4.peg.263	fig|636.4.peg.3090
ETAE_0356		CytoplasmicMembrane	hypothetical protein	fig|718251.4.peg.318	fig|667120.3.peg.158	fig|67780.5.peg.3004	fig|634503.5.peg.388	fig|667121.3.peg.3062	fig|500638.4.peg.264	fig|636.4.peg.3091
ETAE_0358	purA	Cytoplasmic	adenylosuccinate synthase	fig|718251.4.peg.320	fig|667120.3.peg.160	fig|67780.5.peg.3006	fig|634503.5.peg.390	fig|667121.3.peg.3059	fig|500638.4.peg.266	fig|636.4.peg.3094
ETAE_0359		Cytoplasmic	putative transcriptional regulator	fig|718251.4.peg.322	fig|667120.3.peg.161	fig|67780.5.peg.3007	fig|634503.5.peg.392	fig|667121.3.peg.3058	fig|500638.4.peg.267	fig|636.4.peg.3095
ETAE_0360	rnr	Cytoplasmic	exoribonuclease R	fig|718251.4.peg.323	fig|667120.3.peg.162	fig|67780.5.peg.3008	fig|634503.5.peg.393	fig|667121.3.peg.3057	fig|500638.4.peg.268	fig|636.4.peg.3096
ETAE_0361	yjfH	Cytoplasmic	23S rRNA (guanosine-2'-O-)-methyltransferase	fig|718251.4.peg.324	fig|667120.3.peg.163	fig|67780.5.peg.3009	fig|634503.5.peg.394	fig|667121.3.peg.3056	fig|500638.4.peg.269	fig|636.4.peg.3097
ETAE_0362		Unknown	hypothetical protein	fig|718251.4.peg.325	fig|667120.3.peg.164	fig|67780.5.peg.3010	fig|634503.5.peg.395	fig|667121.3.peg.3055	fig|500638.4.peg.270	fig|636.4.peg.3098
ETAE_0363		Unknown	conserved hypothetical protein	fig|718251.4.peg.326	fig|667120.3.peg.165	fig|67780.5.peg.3011	fig|634503.5.peg.396	fig|667121.3.peg.3054	fig|500638.4.peg.271	fig|636.4.peg.3099
ETAE_0364		Unknown	hydrolases of the alpha/beta superfamily	fig|718251.4.peg.327	fig|667120.3.peg.166	fig|67780.5.peg.3012	fig|634503.5.peg.397	fig|667121.3.peg.3053	fig|500638.4.peg.272	fig|636.4.peg.3100
ETAE_0366	rpsF	Cytoplasmic	30S ribosomal protein S6	fig|718251.4.peg.329	fig|667120.3.peg.168	fig|67780.5.peg.3014	fig|634503.5.peg.399	fig|667121.3.peg.3051	fig|500638.4.peg.274	fig|636.4.peg.3102
ETAE_0367	rpsR	Cytoplasmic	30S ribosomal protein S18	fig|718251.4.peg.331	fig|667120.3.peg.170	fig|67780.5.peg.3016	fig|634503.5.peg.401	fig|667121.3.peg.3049	fig|500638.4.peg.276	fig|636.4.peg.3104
ETAE_0368	rplI	Cytoplasmic	50S ribosomal protein L9	fig|718251.4.peg.332	fig|667120.3.peg.171	fig|67780.5.peg.3017	fig|634503.5.peg.402	fig|667121.3.peg.3048	fig|500638.4.peg.277	fig|636.4.peg.3105
ETAE_0369		Unknown	hypothetical protein	fig|718251.4.peg.333	fig|667120.3.peg.172	fig|67780.5.peg.3018	fig|634503.5.peg.403	fig|667121.3.peg.3047	fig|500638.4.peg.278	fig|636.4.peg.3106
ETAE_0371	fklB	OuterMembrane	peptidyl-prolyl cis-trans isomerase	fig|718251.4.peg.335	fig|667120.3.peg.174	fig|67780.5.peg.3020	fig|634503.5.peg.405	fig|667121.3.peg.1394	fig|500638.4.peg.280	fig|636.4.peg.3108
ETAE_0372	ytfE	Unknown	cell morphogenesis/cell wall metabolism regulator	fig|718251.4.peg.336	fig|667120.3.peg.175	fig|67780.5.peg.3021	fig|634503.5.peg.406	fig|667121.3.peg.1395	fig|500638.4.peg.281	fig|636.4.peg.3109
ETAE_0373	cysQ	Unknown	3'-phosphoadenosine 5'-phosphosulfate (PAPS) 3'-phosphatase	fig|718251.4.peg.337	fig|667120.3.peg.177	fig|67780.5.peg.3023	fig|634503.5.peg.408	fig|667121.3.peg.1396	fig|500638.4.peg.282	fig|636.4.peg.3110
ETAE_0374		Unknown	hypothetical protein	fig|718251.4.peg.338	fig|667120.3.peg.178	fig|67780.5.peg.3024	fig|634503.5.peg.409	fig|667121.3.peg.1397	fig|500638.4.peg.283	fig|636.4.peg.3111
ETAE_0375		CytoplasmicMembrane	hypothetical protein	fig|718251.4.peg.339	fig|667120.3.peg.179	fig|67780.5.peg.3025	fig|634503.5.peg.410	fig|667121.3.peg.1398	fig|500638.4.peg.284	fig|636.4.peg.3112
ETAE_0376	msrA	Cytoplasmic	methionine sulfoxide reductase A	fig|718251.4.peg.340	fig|667120.3.peg.181	fig|67780.5.peg.3027	fig|634503.5.peg.411	fig|667121.3.peg.1399	fig|500638.4.peg.285	fig|636.4.peg.3113
ETAE_0377		OuterMembrane	putative outer membrane protein	fig|718251.4.peg.341	fig|667120.3.peg.182	fig|67780.5.peg.3028	fig|634503.5.peg.412	fig|667121.3.peg.1400	fig|500638.4.peg.286	fig|636.4.peg.3114
ETAE_0379		Unknown	conserved hypothetical protein	fig|718251.4.peg.343	fig|667120.3.peg.184	fig|67780.5.peg.3030	fig|634503.5.peg.414	fig|667121.3.peg.1402	fig|500638.4.peg.289	fig|636.4.peg.3116
ETAE_0380	ppa	Cytoplasmic	Inorganic pyrophosphatase	fig|718251.4.peg.344	fig|667120.3.peg.185	fig|67780.5.peg.3031	fig|634503.5.peg.415	fig|667121.3.peg.1403	fig|500638.4.peg.290	fig|636.4.peg.3117
ETAE_0381	fbp	Unknown	fructose-1,6-bisphosphatase	fig|718251.4.peg.345	fig|667120.3.peg.186	fig|67780.5.peg.3032	fig|634503.5.peg.416	fig|667121.3.peg.1404	fig|500638.4.peg.291	fig|636.4.peg.3118
ETAE_0382	yjfG	Cytoplasmic	UDP-N-acetylmuramate:L-alanyl-gamma-D-glutamyl-meso-diaminopimelate ligase	fig|718251.4.peg.346	fig|667120.3.peg.187	fig|67780.5.peg.3033	fig|634503.5.peg.417	fig|667121.3.peg.1405	fig|500638.4.peg.292	fig|636.4.peg.3119
ETAE_0386	mdh	Unknown	malate/lactate dehydrogenases	fig|718251.4.peg.350	fig|667120.3.peg.190	fig|67780.5.peg.3037	fig|634503.5.peg.420	fig|667121.3.peg.1408	fig|500638.4.peg.295	fig|636.4.peg.3122
ETAE_0388	ispB	Cytoplasmic	octaprenyl diphosphate synthase	fig|718251.4.peg.352	fig|667120.3.peg.192	fig|67780.5.peg.3039	fig|634503.5.peg.422	fig|667121.3.peg.1410	fig|500638.4.peg.297	fig|636.4.peg.3124
ETAE_0390	rpmA	Unknown	50S ribosomal protein L27	fig|718251.4.peg.355	fig|667120.3.peg.194	fig|67780.5.peg.3041	fig|634503.5.peg.424	fig|667121.3.peg.1412	fig|500638.4.peg.299	fig|636.4.peg.3126
ETAE_0391		CytoplasmicMembrane	hypothetical protein	fig|718251.4.peg.356	fig|667120.3.peg.195	fig|67780.5.peg.3042	fig|634503.5.peg.425	fig|667121.3.peg.1413	fig|500638.4.peg.300	fig|636.4.peg.3127
ETAE_0392		Cytoplasmic	putative GTP-binding protein	fig|718251.4.peg.357	fig|667120.3.peg.196	fig|67780.5.peg.3043	fig|634503.5.peg.426	fig|667121.3.peg.1414	fig|500638.4.peg.301	fig|636.4.peg.3128
ETAE_0393	basS	CytoplasmicMembrane	sensor protein BasS/PmrB	fig|718251.4.peg.358	fig|667120.3.peg.197	fig|67780.5.peg.3044	fig|634503.5.peg.427	fig|667121.3.peg.1415	fig|500638.4.peg.302	fig|636.4.peg.3129
ETAE_0394	basR	Cytoplasmic	DNA-binding response regulator in two-component regulatory system with BasS	fig|718251.4.peg.359	fig|667120.3.peg.198	fig|67780.5.peg.3045	fig|634503.5.peg.428	fig|667121.3.peg.1416	fig|500638.4.peg.303	fig|636.4.peg.3130
ETAE_0395	dacD	Unknown	D-alanyl-D-alanine carboxypeptidase/endopeptidase	fig|718251.4.peg.360	fig|667120.3.peg.199	fig|67780.5.peg.3046	fig|634503.5.peg.429	fig|667121.3.peg.1417	fig|500638.4.peg.304	fig|636.4.peg.3131
ETAE_0396	greA	Cytoplasmic	transcription elongation factor	fig|718251.4.peg.361	fig|667120.3.peg.200	fig|67780.5.peg.3047	fig|634503.5.peg.430	fig|667121.3.peg.1418	fig|500638.4.peg.305	fig|636.4.peg.3132
ETAE_0397	yhbY	Unknown	RNA-binding protein	fig|718251.4.peg.362	fig|667120.3.peg.201	fig|67780.5.peg.3048	fig|634503.5.peg.431	fig|667121.3.peg.1419	fig|500638.4.peg.306	fig|636.4.peg.3133
ETAE_0398	ftsJ	Unknown	cell division protein methyltransferase FtsJ	fig|718251.4.peg.363	fig|667120.3.peg.202	fig|67780.5.peg.3049	fig|634503.5.peg.432	fig|667121.3.peg.1420	fig|500638.4.peg.307	fig|636.4.peg.3134
ETAE_0399	ftsH	CytoplasmicMembrane	cell division protease FtsH	fig|718251.4.peg.364	fig|667120.3.peg.203	fig|67780.5.peg.3050	fig|634503.5.peg.433	fig|667121.3.peg.1421	fig|500638.4.peg.308	fig|636.4.peg.3135
ETAE_0400	folP	Cytoplasmic	dihydropteroate synthase	fig|718251.4.peg.365	fig|667120.3.peg.204	fig|67780.5.peg.3051	fig|634503.5.peg.434	fig|667121.3.peg.1422	fig|500638.4.peg.309	fig|636.4.peg.3136
ETAE_0401	glmM	Cytoplasmic	phosphoglucosamine mutase	fig|718251.4.peg.366	fig|667120.3.peg.205	fig|67780.5.peg.3052	fig|634503.5.peg.435	fig|667121.3.peg.1423	fig|500638.4.peg.310	fig|636.4.peg.3137
ETAE_0402	secG	CytoplasmicMembrane	preprotein translocase subunit SecG	fig|718251.4.peg.367	fig|667120.3.peg.206	fig|67780.5.peg.3053	fig|634503.5.peg.436	fig|667121.3.peg.1424	fig|500638.4.peg.311	fig|636.4.peg.3138
ETAE_0403		Cytoplasmic	conserved hypothetical protein	fig|718251.4.peg.368	fig|667120.3.peg.207	fig|67780.5.peg.3054	fig|634503.5.peg.437	fig|667121.3.peg.1938	fig|500638.4.peg.312	fig|636.4.peg.3139
ETAE_0404	nusA	Cytoplasmic	transcription elongation factor	fig|718251.4.peg.369	fig|667120.3.peg.208	fig|67780.5.peg.3055	fig|634503.5.peg.438	fig|667121.3.peg.1939	fig|500638.4.peg.313	fig|636.4.peg.3140
ETAE_0405	infB	Cytoplasmic	translation initiation factor 2	fig|718251.4.peg.370	fig|667120.3.peg.209	fig|67780.5.peg.3056	fig|634503.5.peg.439	fig|667121.3.peg.1940	fig|500638.4.peg.314	fig|636.4.peg.3141
ETAE_0406	rbfA	Cytoplasmic	ribosome-binding factor A	fig|718251.4.peg.371	fig|667120.3.peg.210	fig|67780.5.peg.3057	fig|634503.5.peg.440	fig|667121.3.peg.1941	fig|500638.4.peg.315	fig|636.4.peg.3142
ETAE_0407	truB	Cytoplasmic	tRNA pseudouridine synthase B	fig|718251.4.peg.372	fig|667120.3.peg.211	fig|67780.5.peg.3058	fig|634503.5.peg.441	fig|667121.3.peg.1942	fig|500638.4.peg.316	fig|636.4.peg.3143
ETAE_0408	rpsO	Unknown	30S ribosomal protein S15	fig|718251.4.peg.373	fig|667120.3.peg.212	fig|67780.5.peg.3059	fig|634503.5.peg.442	fig|667121.3.peg.1943	fig|500638.4.peg.317	fig|636.4.peg.3144
ETAE_0409	pnp	Cytoplasmic	polyribonucleotide nucleotidyltransferase	fig|718251.4.peg.374	fig|667120.3.peg.213	fig|67780.5.peg.3060	fig|634503.5.peg.443	fig|667121.3.peg.1944	fig|500638.4.peg.318	fig|636.4.peg.3145
ETAE_0410	nlpI	OuterMembrane	lipoprotein NlpI, contains TPR repeats	fig|718251.4.peg.375	fig|667120.3.peg.214	fig|67780.5.peg.3061	fig|634503.5.peg.444	fig|667121.3.peg.1945	fig|500638.4.peg.319	fig|636.4.peg.3146
ETAE_0411	deaD	Cytoplasmic	ATP-dependent RNA helicase	fig|718251.4.peg.376	fig|667120.3.peg.215	fig|67780.5.peg.3062	fig|634503.5.peg.445	fig|667121.3.peg.1946	fig|500638.4.peg.320	fig|636.4.peg.3147
ETAE_0415		Cytoplasmic	conserved hypothetical protein	fig|718251.4.peg.380	fig|667120.3.peg.219	fig|67780.5.peg.3065	fig|634503.5.peg.449	fig|667121.3.peg.1949	fig|500638.4.peg.323	fig|636.4.peg.3150
ETAE_0416	yhbU	Cytoplasmic	putative collagenase	fig|718251.4.peg.381	fig|667120.3.peg.220	fig|67780.5.peg.3066	fig|634503.5.peg.450	fig|667121.3.peg.1950	fig|500638.4.peg.324	fig|636.4.peg.3151
ETAE_0417		Cytoplasmic	putative lipid carrier protein	fig|718251.4.peg.382	fig|667120.3.peg.221	fig|67780.5.peg.3067	fig|634503.5.peg.451	fig|667121.3.peg.1951	fig|500638.4.peg.325	fig|636.4.peg.3152
ETAE_0418		Cytoplasmic	putative acetyltransferase	fig|718251.4.peg.383	fig|667120.3.peg.222	fig|67780.5.peg.3068	fig|634503.5.peg.452	fig|667121.3.peg.1952	fig|500638.4.peg.326	fig|636.4.peg.3153
ETAE_0419	putP	CytoplasmicMembrane	Na+/proline symporter	fig|718251.4.peg.384	fig|667120.3.peg.224	fig|67780.5.peg.3069	fig|634503.5.peg.453	fig|667121.3.peg.1953	fig|500638.4.peg.327	fig|636.4.peg.3154
ETAE_0421		Unknown	conserved hypothetical protein	fig|718251.4.peg.386	fig|667120.3.peg.226	fig|67780.5.peg.3071	fig|634503.5.peg.455	fig|667121.3.peg.1956	fig|500638.4.peg.330	fig|636.4.peg.3157
ETAE_0422	nrdG	Unknown	anaerobic ribonucleotide reductase activating protein	fig|718251.4.peg.387	fig|667120.3.peg.227	fig|67780.5.peg.3072	fig|634503.5.peg.456	fig|667121.3.peg.1957	fig|500638.4.peg.331	fig|636.4.peg.3158
ETAE_0423	nrdD	Cytoplasmic	anaerobic ribonucleoside triphosphate reductase	fig|718251.4.peg.388	fig|667120.3.peg.228	fig|67780.5.peg.3073	fig|634503.5.peg.457	fig|667121.3.peg.1958	fig|500638.4.peg.332	fig|636.4.peg.3159
ETAE_0427		Unknown	conserved hypothetical protein	fig|718251.4.peg.392	fig|667120.3.peg.231	fig|67780.5.peg.3076	fig|634503.5.peg.460	fig|667121.3.peg.1960	fig|500638.4.peg.334	fig|636.4.peg.3161
ETAE_0428		Cytoplasmic	conserved hypothetical protein	fig|718251.4.peg.393	fig|667120.3.peg.232	fig|67780.5.peg.3077	fig|634503.5.peg.461	fig|667121.3.peg.1961	fig|500638.4.peg.335	fig|636.4.peg.3162
ETAE_0429		Unknown	hypothetical protein	fig|718251.4.peg.394	fig|667120.3.peg.233	fig|67780.5.peg.3078	fig|634503.5.peg.462	fig|667121.3.peg.1962	fig|500638.4.peg.336	fig|636.4.peg.3163
ETAE_0430		CytoplasmicMembrane	putative membrane-associated protein	fig|718251.4.peg.395	fig|667120.3.peg.234	fig|67780.5.peg.3079	fig|634503.5.peg.463	fig|667121.3.peg.1963	fig|500638.4.peg.337	fig|636.4.peg.3164
ETAE_0431		Unknown	putative lipoprotein	fig|718251.4.peg.396	fig|667120.3.peg.235	fig|67780.5.peg.3080	fig|634503.5.peg.464	fig|667121.3.peg.1964	fig|500638.4.peg.338	fig|636.4.peg.3165
ETAE_0432	crcB	CytoplasmicMembrane	camphor resistance protein	fig|718251.4.peg.397	fig|667120.3.peg.236	fig|67780.5.peg.3081	fig|634503.5.peg.465	fig|667121.3.peg.1965	fig|500638.4.peg.339	fig|636.4.peg.3166
ETAE_0434	exuR	Cytoplasmic	DNA-binding transcriptional repressor	fig|718251.4.peg.398	fig|667120.3.peg.237	fig|67780.5.peg.3082	fig|634503.5.peg.466	fig|667121.3.peg.1966	fig|500638.4.peg.340	fig|636.4.peg.3167
ETAE_0436	uxaC	Unknown	glucuronate isomerase	fig|718251.4.peg.400	fig|667120.3.peg.239	fig|67780.5.peg.3087	fig|634503.5.peg.471	fig|667121.3.peg.1968	fig|500638.4.peg.342	fig|636.4.peg.3169
ETAE_0437	uxaB	Cytoplasmic	altronate oxidoreductase	fig|718251.4.peg.401	fig|667120.3.peg.240	fig|67780.5.peg.3088	fig|634503.5.peg.472	fig|667121.3.peg.1969	fig|500638.4.peg.343	fig|636.4.peg.3170
ETAE_0438	uxaA	Cytoplasmic	altronate hydrolase	fig|718251.4.peg.402	fig|667120.3.peg.241	fig|67780.5.peg.3089	fig|634503.5.peg.473	fig|667121.3.peg.1970	fig|500638.4.peg.344	fig|636.4.peg.3171
ETAE_0439		CytoplasmicMembrane	conserved hypothetical protein	fig|718251.4.peg.403	fig|667120.3.peg.242	fig|67780.5.peg.3090	fig|634503.5.peg.474	fig|667121.3.peg.1971	fig|500638.4.peg.345	fig|636.4.peg.3172
ETAE_0440	sstT	CytoplasmicMembrane	sodium/serine (threonine) transporter	fig|718251.4.peg.404	fig|667120.3.peg.243	fig|67780.5.peg.3091	fig|634503.5.peg.475	fig|667121.3.peg.1972	fig|500638.4.peg.346	fig|636.4.peg.3173
ETAE_0441		CytoplasmicMembrane	putative transporter protein	fig|718251.4.peg.405	fig|667120.3.peg.244	fig|67780.5.peg.3092	fig|634503.5.peg.476	fig|667121.3.peg.1973	fig|500638.4.peg.347	fig|636.4.peg.3174
ETAE_0442		CytoplasmicMembrane	hypothetical transport protein	fig|718251.4.peg.406	fig|667120.3.peg.245	fig|67780.5.peg.3093	fig|634503.5.peg.477	fig|667121.3.peg.1974	fig|500638.4.peg.348	fig|636.4.peg.3175
ETAE_0443		Unknown	hypothetical protein	fig|718251.4.peg.407	fig|667120.3.peg.246	fig|67780.5.peg.3094	fig|634503.5.peg.478	fig|667121.3.peg.1975	fig|500638.4.peg.349	fig|636.4.peg.3176
ETAE_0444		Cytoplasmic	putative metal-dependent hydrolase	fig|718251.4.peg.408	fig|667120.3.peg.247	fig|67780.5.peg.3095	fig|634503.5.peg.479	fig|667121.3.peg.1976	fig|500638.4.peg.350	fig|636.4.peg.3177
ETAE_0445	rlmG	Unknown	ribosomal RNA large subunit methyltransferase G	fig|718251.4.peg.409	fig|667120.3.peg.248	fig|67780.5.peg.3096	fig|634503.5.peg.480	fig|667121.3.peg.1977	fig|500638.4.peg.351	fig|636.4.peg.3178
ETAE_0446		Unknown	hypothetical protein	fig|718251.4.peg.410	fig|667120.3.peg.249	fig|67780.5.peg.3097	fig|634503.5.peg.481	fig|667121.3.peg.1978	fig|500638.4.peg.352	fig|636.4.peg.3179
ETAE_0447	qseC	CytoplasmicMembrane	sensor protein	fig|718251.4.peg.411	fig|667120.3.peg.250	fig|67780.5.peg.3098	fig|634503.5.peg.482	fig|667121.3.peg.1979	fig|500638.4.peg.353	fig|636.4.peg.3180
ETAE_0448	qseB	Cytoplasmic	DNA-binding response regulator in two-component regulatory system with QseC	fig|718251.4.peg.412	fig|667120.3.peg.251	fig|67780.5.peg.3099	fig|634503.5.peg.483	fig|667121.3.peg.1980	fig|500638.4.peg.354	fig|636.4.peg.3181
ETAE_0449		Unknown	conserved hypothetical protein	fig|718251.4.peg.413	fig|667120.3.peg.252	fig|67780.5.peg.3100	fig|634503.5.peg.484	fig|667121.3.peg.1981	fig|500638.4.peg.355	fig|636.4.peg.3182
ETAE_0454	rpoD	Cytoplasmic	DNA-directed RNA polymerase, sigma subunit (sigma70/sigma32)	fig|718251.4.peg.418	fig|667120.3.peg.257	fig|67780.5.peg.3106	fig|634503.5.peg.490	fig|667121.3.peg.1986	fig|500638.4.peg.398	fig|636.4.peg.3187
ETAE_0455	dnaG	Cytoplasmic	DNA primase	fig|718251.4.peg.419	fig|667120.3.peg.258	fig|67780.5.peg.3107	fig|634503.5.peg.491	fig|667121.3.peg.1987	fig|500638.4.peg.399	fig|636.4.peg.3188
ETAE_0456	rpsU	Cytoplasmic	30S ribosomal protein S21	fig|718251.4.peg.420	fig|667120.3.peg.259	fig|67780.5.peg.3108	fig|634503.5.peg.492	fig|667121.3.peg.1988	fig|500638.4.peg.400	fig|636.4.peg.3189
ETAE_0457	gcp	Extracellular	O-sialoglycoprotein endopeptidase	fig|718251.4.peg.421	fig|667120.3.peg.260	fig|67780.5.peg.3109	fig|634503.5.peg.493	fig|667121.3.peg.1989	fig|500638.4.peg.401	fig|636.4.peg.3190
ETAE_0458		CytoplasmicMembrane	putative membrane protein	fig|718251.4.peg.422	fig|667120.3.peg.261	fig|67780.5.peg.3110	fig|634503.5.peg.494	fig|667121.3.peg.1990	fig|500638.4.peg.402	fig|636.4.peg.3191
ETAE_0459	folB	Cytoplasmic	bifunctional dihydroneopterin aldolase/dihydroneopterin triphosphate 2'-epimerase	fig|718251.4.peg.423	fig|667120.3.peg.262	fig|67780.5.peg.3111	fig|634503.5.peg.495	fig|667121.3.peg.1991	fig|500638.4.peg.403	fig|636.4.peg.3192
ETAE_0460	bacA	CytoplasmicMembrane	undecaprenyl pyrophosphate phosphatase	fig|718251.4.peg.424	fig|667120.3.peg.263	fig|67780.5.peg.3112	fig|634503.5.peg.496	fig|667121.3.peg.1992	fig|500638.4.peg.404	fig|636.4.peg.3193
ETAE_0461	cca	Cytoplasmic	tRNA nucleotidyltransferase/poly(A) polymerase	fig|718251.4.peg.425	fig|667120.3.peg.264	fig|67780.5.peg.3113	fig|634503.5.peg.497	fig|667121.3.peg.1993	fig|500638.4.peg.405	fig|636.4.peg.3194
ETAE_0462		Unknown	putative signal transduction protein	fig|718251.4.peg.426	fig|667120.3.peg.265	fig|67780.5.peg.3114	fig|634503.5.peg.498	fig|667121.3.peg.1994	fig|500638.4.peg.406	fig|636.4.peg.3195
ETAE_0463		CytoplasmicMembrane	putative phosphate/sulphate permease	fig|718251.4.peg.427	fig|667120.3.peg.266	fig|67780.5.peg.3115	fig|634503.5.peg.499	fig|667121.3.peg.1995	fig|500638.4.peg.407	fig|636.4.peg.3197
ETAE_0464		Cytoplasmic	putative phosphate transport regulator	fig|718251.4.peg.428	fig|667120.3.peg.267	fig|67780.5.peg.3116	fig|634503.5.peg.500	fig|667121.3.peg.1996	fig|500638.4.peg.408	fig|636.4.peg.3198
ETAE_0465		Unknown	hypothetical protein	fig|718251.4.peg.430	fig|667120.3.peg.269	fig|67780.5.peg.3117	fig|634503.5.peg.501	fig|667121.3.peg.1997	fig|500638.4.peg.409	fig|636.4.peg.3199
ETAE_0467	glnE	CytoplasmicMembrane	glutamine synthetase adenylyltransferase	fig|718251.4.peg.431	fig|667120.3.peg.270	fig|67780.5.peg.3118	fig|634503.5.peg.502	fig|667121.3.peg.1998	fig|500638.4.peg.410	fig|636.4.peg.3200
ETAE_0468	htrB	CytoplasmicMembrane	lipid A biosynthesis lauroyl acyltransferase	fig|718251.4.peg.432	fig|667120.3.peg.271	fig|67780.5.peg.3119	fig|634503.5.peg.503	fig|667121.3.peg.1999	fig|500638.4.peg.411	fig|636.4.peg.3201
ETAE_0469	hldE	Cytoplasmic	fused heptose 7-phosphate kinase/heptose 1-phosphate adenyltransferase	fig|718251.4.peg.433	fig|667120.3.peg.272	fig|67780.5.peg.3120	fig|634503.5.peg.504	fig|667121.3.peg.2000	fig|500638.4.peg.412	fig|636.4.peg.3202
ETAE_0470		CytoplasmicMembrane	basic amino acid/polyamine antiporter, APA family	fig|718251.4.peg.434	fig|667120.3.peg.273	fig|67780.5.peg.3121	fig|634503.5.peg.505	fig|667121.3.peg.2001	fig|500638.4.peg.413	fig|636.4.peg.3203
ETAE_0471		Cytoplasmic	conserved hypothetical protein	fig|718251.4.peg.435	fig|667120.3.peg.274	fig|67780.5.peg.3122	fig|634503.5.peg.506	fig|667121.3.peg.2002	fig|500638.4.peg.414	fig|636.4.peg.3204
ETAE_0472	ribB	Cytoplasmic	3,4-dihydroxy-2-butanone 4-phosphate synthase	fig|718251.4.peg.436	fig|667120.3.peg.275	fig|67780.5.peg.1232	fig|634503.5.peg.509	fig|667121.3.peg.2003	fig|500638.4.peg.415	fig|636.4.peg.3206
ETAE_0473		CytoplasmicMembrane	putative divalent heavy-metal cations transporter	fig|718251.4.peg.437	fig|667120.3.peg.276	fig|67780.5.peg.1231	fig|634503.5.peg.510	fig|667121.3.peg.2004	fig|500638.4.peg.416	fig|636.4.peg.3207
ETAE_0474		Unknown	conserved hypothetical protein	fig|718251.4.peg.438	fig|667120.3.peg.277	fig|67780.5.peg.1230	fig|634503.5.peg.511	fig|667121.3.peg.2005	fig|500638.4.peg.417	fig|636.4.peg.3208
ETAE_0475	rsmC	Cytoplasmic	16S RNA G1207 methylase	fig|718251.4.peg.439	fig|667120.3.peg.278	fig|67780.5.peg.2157	fig|634503.5.peg.512	fig|667121.3.peg.1438	fig|500638.4.peg.418	fig|636.4.peg.3209
ETAE_0476	holD	Unknown	DNA polymerase III, psi subunit	fig|718251.4.peg.440	fig|667120.3.peg.279	fig|67780.5.peg.2158	fig|634503.5.peg.513	fig|667121.3.peg.1437	fig|500638.4.peg.419	fig|636.4.peg.3210
ETAE_0477	rimI	Cytoplasmic	acetylation of N-terminal alanine	fig|718251.4.peg.441	fig|667120.3.peg.280	fig|67780.5.peg.2159	fig|634503.5.peg.514	fig|667121.3.peg.1436	fig|500638.4.peg.420	fig|636.4.peg.3211
ETAE_0479	prfC	Cytoplasmic	peptide chain release factor RF-3	fig|718251.4.peg.443	fig|667120.3.peg.281	fig|67780.5.peg.2160	fig|634503.5.peg.515	fig|667121.3.peg.1435	fig|500638.4.peg.421	fig|636.4.peg.3212
ETAE_0480		Unknown	putative esterase of the alpha-beta hydrolase superfamily	fig|718251.4.peg.444	fig|667120.3.peg.282	fig|67780.5.peg.2161	fig|634503.5.peg.516	fig|667121.3.peg.1434	fig|500638.4.peg.422	fig|636.4.peg.3213
ETAE_0481	tatD	Cytoplasmic	putative deoxyribonuclease	fig|718251.4.peg.445	fig|667120.3.peg.283	fig|67780.5.peg.2162	fig|634503.5.peg.517	fig|667121.3.peg.1433	fig|500638.4.peg.423	fig|636.4.peg.3214
ETAE_0483		Cytoplasmic	putative pyruvate-formate lyase-activating enzyme	fig|718251.4.peg.447	fig|667120.3.peg.285	fig|67780.5.peg.2164	fig|634503.5.peg.519	fig|667121.3.peg.2208	fig|500638.4.peg.425	fig|636.4.peg.1738
ETAE_0484		Cytoplasmic	conserved hypothetical protein	fig|718251.4.peg.448	fig|667120.3.peg.286	fig|67780.5.peg.2166	fig|634503.5.peg.521	fig|667121.3.peg.2207	fig|500638.4.peg.426	fig|636.4.peg.1739
ETAE_0486	deoC	Cytoplasmic	deoxyribose-phosphate aldolase	fig|718251.4.peg.449	fig|667120.3.peg.288	fig|67780.5.peg.2167	fig|634503.5.peg.522	fig|667121.3.peg.2206	fig|500638.4.peg.427	fig|636.4.peg.1740
ETAE_0487	deoA	Unknown	thymidine phosphorylase	fig|718251.4.peg.450	fig|667120.3.peg.289	fig|67780.5.peg.2168	fig|634503.5.peg.523	fig|667121.3.peg.2205	fig|500638.4.peg.428	fig|636.4.peg.1741
ETAE_0488	deoB	Cytoplasmic	phosphopentomutase	fig|718251.4.peg.451	fig|667120.3.peg.290	fig|67780.5.peg.2169	fig|634503.5.peg.524	fig|667121.3.peg.2204	fig|500638.4.peg.429	fig|636.4.peg.1742
ETAE_0489	deoD	Cytoplasmic	purine-nucleoside phosphorylase	fig|718251.4.peg.452	fig|667120.3.peg.291	fig|67780.5.peg.2170	fig|634503.5.peg.525	fig|667121.3.peg.2203	fig|500638.4.peg.430	fig|636.4.peg.1743
ETAE_0490		Periplasmic	putative cytochrome	fig|718251.4.peg.453	fig|667120.3.peg.292	fig|67780.5.peg.2171	fig|634503.5.peg.526	fig|667121.3.peg.2202	fig|500638.4.peg.480	fig|636.4.peg.1744
ETAE_0493	npr	Cytoplasmic	putative phosphocarrier protein	fig|718251.4.peg.456	fig|667120.3.peg.295	fig|67780.5.peg.2174	fig|634503.5.peg.529	fig|667121.3.peg.2199	fig|500638.4.peg.433	fig|636.4.peg.1747
ETAE_0494		Cytoplasmic	conserved hypothetical protein	fig|718251.4.peg.457	fig|667120.3.peg.296	fig|67780.5.peg.2175	fig|634503.5.peg.530	fig|667121.3.peg.2198	fig|500638.4.peg.434	fig|636.4.peg.1748
ETAE_0495	ptsN	Cytoplasmic	sugar-specific enzyme IIA component of PTS	fig|718251.4.peg.458	fig|667120.3.peg.297	fig|67780.5.peg.2176	fig|634503.5.peg.531	fig|667121.3.peg.2197	fig|500638.4.peg.435	fig|636.4.peg.1749
ETAE_0496		Cytoplasmic	putative sigma(54) modulation protein	fig|718251.4.peg.459	fig|667120.3.peg.298	fig|67780.5.peg.2177	fig|634503.5.peg.532	fig|667121.3.peg.2196	fig|500638.4.peg.436	fig|636.4.peg.1750
ETAE_0497	rpoN	Cytoplasmic	RNA polymerase factor sigma-54	fig|718251.4.peg.460	fig|667120.3.peg.299	fig|67780.5.peg.2178	fig|634503.5.peg.533	fig|667121.3.peg.2195	fig|500638.4.peg.437	fig|636.4.peg.1751
ETAE_0498	lptB	Cytoplasmic	lipopolysaccharide export system ATP-binding protein	fig|718251.4.peg.461	fig|667120.3.peg.300	fig|67780.5.peg.2179	fig|634503.5.peg.534	fig|667121.3.peg.2194	fig|500638.4.peg.438	fig|636.4.peg.1752
ETAE_0499	lptA	Unknown	lipopolysaccharide export system protein LptA	fig|718251.4.peg.462	fig|667120.3.peg.301	fig|67780.5.peg.2180	fig|634503.5.peg.535	fig|667121.3.peg.2193	fig|500638.4.peg.439	fig|636.4.peg.1753
ETAE_0500	lptC	Unknown	lipopolysaccharide export system protein LptC	fig|718251.4.peg.463	fig|667120.3.peg.302	fig|67780.5.peg.2181	fig|634503.5.peg.536	fig|667121.3.peg.2192	fig|500638.4.peg.440	fig|636.4.peg.1754
ETAE_0501	kdsC	Cytoplasmic	3-deoxy-D-manno-octulosonate 8-phosphate phosphatase	fig|718251.4.peg.464	fig|667120.3.peg.303	fig|67780.5.peg.2182	fig|634503.5.peg.537	fig|667121.3.peg.2191	fig|500638.4.peg.441	fig|636.4.peg.1755
ETAE_0502	yrbH	Cytoplasmic	D-arabinose 5-phosphate isomerase	fig|718251.4.peg.465	fig|667120.3.peg.304	fig|67780.5.peg.2183	fig|634503.5.peg.538	fig|667121.3.peg.2190	fig|500638.4.peg.442	fig|636.4.peg.1756
ETAE_0503	yrbG	CytoplasmicMembrane	putative calcium/sodium:proton antiporter	fig|718251.4.peg.466	fig|667120.3.peg.305	fig|67780.5.peg.2184	fig|634503.5.peg.539	fig|667121.3.peg.2189	fig|500638.4.peg.443	fig|636.4.peg.1757
ETAE_0504	yrbF	Unknown	putative ABC transporter ATP-binding protein	fig|718251.4.peg.467	fig|667120.3.peg.306	fig|67780.5.peg.2185	fig|634503.5.peg.540	fig|667121.3.peg.2188	fig|500638.4.peg.444	fig|636.4.peg.1758
ETAE_0505	yrbE	CytoplasmicMembrane	putative transport protein	fig|718251.4.peg.468	fig|667120.3.peg.307	fig|67780.5.peg.2186	fig|634503.5.peg.541	fig|667121.3.peg.2187	fig|500638.4.peg.445	fig|636.4.peg.1759
ETAE_0506		Unknown	conserved hypothetical protein	fig|718251.4.peg.469	fig|667120.3.peg.308	fig|67780.5.peg.2187	fig|634503.5.peg.542	fig|667121.3.peg.2186	fig|500638.4.peg.446	fig|636.4.peg.1760
ETAE_0507		Unknown	conserved hypothetical protein	fig|718251.4.peg.470	fig|667120.3.peg.309	fig|67780.5.peg.2188	fig|634503.5.peg.543	fig|667121.3.peg.2185	fig|500638.4.peg.447	fig|636.4.peg.1761
ETAE_0509		Unknown	conserved hypothetical protein, BolA superfamily	fig|718251.4.peg.472	fig|667120.3.peg.311	fig|67780.5.peg.2190	fig|634503.5.peg.545	fig|667121.3.peg.2183	fig|500638.4.peg.449	fig|636.4.peg.1763
ETAE_0510	murA	Cytoplasmic	UDP-N-acetylglucosamine enolpyruvyl transferase	fig|718251.4.peg.473	fig|667120.3.peg.312	fig|67780.5.peg.2191	fig|634503.5.peg.546	fig|667121.3.peg.2182	fig|500638.4.peg.450	fig|636.4.peg.1764
ETAE_0511	degS	Periplasmic	serine endoprotease	fig|718251.4.peg.474	fig|667120.3.peg.313	fig|67780.5.peg.2192	fig|634503.5.peg.547	fig|667121.3.peg.2181	fig|500638.4.peg.451	fig|636.4.peg.1765
ETAE_0513	yhcB	Unknown	cytochrome d ubiquinol oxidase subunit III	fig|718251.4.peg.476	fig|667120.3.peg.315	fig|67780.5.peg.2195	fig|634503.5.peg.550	fig|667121.3.peg.2179	fig|500638.4.peg.453	fig|636.4.peg.1767
ETAE_0514		Unknown	hypothetical protein	fig|718251.4.peg.477	fig|667120.3.peg.316	fig|67780.5.peg.2196	fig|634503.5.peg.551	fig|667121.3.peg.2178	fig|500638.4.peg.454	fig|636.4.peg.1768
ETAE_0515	rplM	Cytoplasmic	50S ribosomal protein L13	fig|718251.4.peg.478	fig|667120.3.peg.317	fig|67780.5.peg.2197	fig|634503.5.peg.552	fig|667121.3.peg.2177	fig|500638.4.peg.455	fig|636.4.peg.1769
ETAE_0517	sspA	Cytoplasmic	stringent starvation protein A	fig|718251.4.peg.480	fig|667120.3.peg.319	fig|67780.5.peg.2200	fig|634503.5.peg.555	fig|667121.3.peg.2175	fig|500638.4.peg.457	fig|636.4.peg.1772
ETAE_0518	sspB	Cytoplasmic	ClpXP protease specificity-enhancing factor	fig|718251.4.peg.481	fig|667120.3.peg.320	fig|67780.5.peg.2201	fig|634503.5.peg.556	fig|667121.3.peg.2174	fig|500638.4.peg.458	fig|636.4.peg.1773
ETAE_0520	nanK	Cytoplasmic	putative N-acetylmannosamine kinase	fig|718251.4.peg.483	fig|667120.3.peg.322	fig|67780.5.peg.2203	fig|634503.5.peg.558	fig|667121.3.peg.2172	fig|500638.4.peg.460	fig|636.4.peg.1775
ETAE_0521	nanE	Unknown	N-acetylmannosamine-6-phosphate 2-epimerase	fig|718251.4.peg.484	fig|667120.3.peg.323	fig|67780.5.peg.2204	fig|634503.5.peg.559	fig|667121.3.peg.2171	fig|500638.4.peg.461	fig|636.4.peg.1776
ETAE_0522	dsbB	CytoplasmicMembrane	disulfide bond formation protein	fig|718251.4.peg.485	fig|667120.3.peg.324	fig|67780.5.peg.2205	fig|634503.5.peg.560	fig|667121.3.peg.2170	fig|500638.4.peg.462	fig|636.4.peg.1777
ETAE_0523	dsbA	Periplasmic	disulfide isomerase	fig|718251.4.peg.486	fig|667120.3.peg.325	fig|67780.5.peg.2206	fig|634503.5.peg.561	fig|667121.3.peg.2169	fig|500638.4.peg.463	fig|636.4.peg.1778
ETAE_0524	assT	Unknown	arylsulfate sulfotransferase	fig|718251.4.peg.487	fig|667120.3.peg.326	fig|67780.5.peg.2207	fig|634503.5.peg.562	fig|667121.3.peg.2168	fig|500638.4.peg.464	fig|636.4.peg.1779
ETAE_0525		Cytoplasmic	putative transcriptional regulator LysR-like protein	fig|718251.4.peg.488	fig|667120.3.peg.328	fig|67780.5.peg.2208	fig|634503.5.peg.563	fig|667121.3.peg.2167	fig|500638.4.peg.465	fig|636.4.peg.1780
ETAE_0527	gltB	Unknown	glutamate synthase subunit alpha	fig|718251.4.peg.490	fig|667120.3.peg.330	fig|67780.5.peg.2210	fig|634503.5.peg.565	fig|667121.3.peg.493	fig|500638.4.peg.467	fig|636.4.peg.1782
ETAE_0529	arcB	CytoplasmicMembrane	aerobic respiration control sensor protein	fig|718251.4.peg.492	fig|667120.3.peg.332	fig|67780.5.peg.2212	fig|634503.5.peg.567	fig|667121.3.peg.490	fig|500638.4.peg.104	fig|636.4.peg.1786
ETAE_0531	elbB	Unknown	isoprenoid biosynthesis protein with amidotransferase-like domain	fig|718251.4.peg.493	fig|667120.3.peg.334	fig|67780.5.peg.2213	fig|634503.5.peg.568	fig|667121.3.peg.489	fig|500638.4.peg.105	fig|636.4.peg.1787
ETAE_0532	mtgA	Unknown	monofunctional biosynthetic peptidoglycan transglycosylase	fig|718251.4.peg.494	fig|667120.3.peg.335	fig|67780.5.peg.2214	fig|634503.5.peg.569	fig|667121.3.peg.488	fig|500638.4.peg.106	fig|636.4.peg.1788
ETAE_0533		Periplasmic	hypothetical protein	fig|718251.4.peg.495	fig|667120.3.peg.336	fig|67780.5.peg.2215	fig|634503.5.peg.570	fig|667121.3.peg.487	fig|500638.4.peg.107	fig|636.4.peg.1789
ETAE_0534	gmhA	Cytoplasmic	phosphoheptose isomerase	fig|718251.4.peg.496	fig|667120.3.peg.337	fig|67780.5.peg.2216	fig|634503.5.peg.571	fig|667121.3.peg.486	fig|500638.4.peg.108	fig|636.4.peg.1790
ETAE_0536		Unknown	hypothetical protein	fig|718251.4.peg.498	fig|667120.3.peg.339	fig|67780.5.peg.2218	fig|634503.5.peg.573	fig|667121.3.peg.484	fig|500638.4.peg.110	fig|636.4.peg.1792
ETAE_0537		Cytoplasmic	putative tetrapyrrole methylase	fig|718251.4.peg.499	fig|667120.3.peg.340	fig|67780.5.peg.2219	fig|634503.5.peg.574	fig|667121.3.peg.483	fig|500638.4.peg.111	fig|636.4.peg.1793
ETAE_0538		Unknown	hypothetical protein	fig|718251.4.peg.501	fig|667120.3.peg.342	fig|67780.5.peg.2221	fig|634503.5.peg.576	fig|667121.3.peg.481	fig|500638.4.peg.113	fig|636.4.peg.1795
ETAE_0539	serB	Cytoplasmic	phosphoserine phosphatase	fig|718251.4.peg.502	fig|667120.3.peg.343	fig|67780.5.peg.2222	fig|634503.5.peg.577	fig|667121.3.peg.480	fig|500638.4.peg.114	fig|636.4.peg.1796
ETAE_0540	radA	Unknown	DNA repair protein RadA	fig|718251.4.peg.503	fig|667120.3.peg.344	fig|67780.5.peg.2223	fig|634503.5.peg.578	fig|667121.3.peg.479	fig|500638.4.peg.115	fig|636.4.peg.1797
ETAE_0542	slt	Unknown	lytic murein transglycosylase	fig|718251.4.peg.505	fig|667120.3.peg.346	fig|67780.5.peg.2225	fig|634503.5.peg.580	fig|667121.3.peg.850	fig|500638.4.peg.117	fig|636.4.peg.1800
ETAE_0543	trpR	Unknown	Trp operon repressor	fig|718251.4.peg.506	fig|667120.3.peg.347	fig|67780.5.peg.2226	fig|634503.5.peg.581	fig|667121.3.peg.849	fig|500638.4.peg.118	fig|636.4.peg.1801
ETAE_0544		Unknown	conserved hypothetical protein	fig|718251.4.peg.507	fig|667120.3.peg.348	fig|67780.5.peg.2227	fig|634503.5.peg.582	fig|667121.3.peg.848	fig|500638.4.peg.119	fig|636.4.peg.1802
ETAE_0545	gpmB	Cytoplasmic	phosphoglycerate mutase	fig|718251.4.peg.508	fig|667120.3.peg.349	fig|67780.5.peg.2228	fig|634503.5.peg.583	fig|667121.3.peg.847	fig|500638.4.peg.120	fig|636.4.peg.1803
ETAE_0546		Cytoplasmic	AraC-type DNA-binding domain-containing protein	fig|718251.4.peg.509	fig|667120.3.peg.350	fig|67780.5.peg.2229	fig|634503.5.peg.584	fig|667121.3.peg.846	fig|500638.4.peg.121	fig|636.4.peg.1804
ETAE_0547		Unknown	conserved hypothetical protein	fig|718251.4.peg.510	fig|667120.3.peg.351	fig|67780.5.peg.2230	fig|634503.5.peg.585	fig|667121.3.peg.845	fig|500638.4.peg.122	fig|636.4.peg.1805
ETAE_0548	proS	Cytoplasmic	prolyl-tRNA synthetase	fig|718251.4.peg.511	fig|667120.3.peg.352	fig|67780.5.peg.2231	fig|634503.5.peg.586	fig|667121.3.peg.844	fig|500638.4.peg.123	fig|636.4.peg.1806
ETAE_0549		Unknown	conserved hypothetical protein	fig|718251.4.peg.512	fig|667120.3.peg.353	fig|67780.5.peg.2232	fig|634503.5.peg.587	fig|667121.3.peg.843	fig|500638.4.peg.124	fig|636.4.peg.1807
ETAE_0550	rcsF	Unknown	outer membrane lipoprotein	fig|718251.4.peg.513	fig|667120.3.peg.354	fig|67780.5.peg.2233	fig|634503.5.peg.588	fig|667121.3.peg.842	fig|500638.4.peg.125	fig|636.4.peg.1808
ETAE_0551	metQ	Unknown	DL-methionine transporter substrate-binding subunit	fig|718251.4.peg.514	fig|667120.3.peg.355	fig|67780.5.peg.2234	fig|634503.5.peg.589	fig|667121.3.peg.841	fig|500638.4.peg.126	fig|636.4.peg.1809
ETAE_0552	metI	CytoplasmicMembrane	DL-methionine transporter permease subunit	fig|718251.4.peg.515	fig|667120.3.peg.356	fig|67780.5.peg.2235	fig|634503.5.peg.590	fig|667121.3.peg.840	fig|500638.4.peg.127	fig|636.4.peg.1810
ETAE_0553	metN	Cytoplasmic	DL-methionine transporter ATP-binding subunit	fig|718251.4.peg.516	fig|667120.3.peg.357	fig|67780.5.peg.2236	fig|634503.5.peg.591	fig|667121.3.peg.839	fig|500638.4.peg.128	fig|636.4.peg.1811
ETAE_0554		Cytoplasmic	D,D-heptose 1,7-bisphosphate phosphatase	fig|718251.4.peg.517	fig|667120.3.peg.358	fig|67780.5.peg.2237	fig|634503.5.peg.592	fig|667121.3.peg.838	fig|500638.4.peg.129	fig|636.4.peg.1812
ETAE_0556	pssA	Cytoplasmic	phosphatidylserine synthase	fig|718251.4.peg.519	fig|667120.3.peg.1771	fig|67780.5.peg.2554	fig|634503.5.peg.600	fig|667121.3.peg.2507	fig|500638.4.peg.666	fig|636.4.peg.212
ETAE_0557		Cytoplasmic	CoA binding domain/acetyltransferase domain protein	fig|718251.4.peg.520	fig|667120.3.peg.1772	fig|67780.5.peg.2555	fig|634503.5.peg.601	fig|667121.3.peg.2508	fig|500638.4.peg.667	fig|636.4.peg.213
ETAE_0558		Unknown	conserved hypothetical protein	fig|718251.4.peg.521	fig|667120.3.peg.1773	fig|67780.5.peg.2556	fig|634503.5.peg.602	fig|667121.3.peg.2509	fig|500638.4.peg.668	fig|636.4.peg.214
ETAE_0559	trxC	Cytoplasmic	thioredoxin 2	fig|718251.4.peg.522	fig|667120.3.peg.1774	fig|67780.5.peg.2557	fig|634503.5.peg.603	fig|667121.3.peg.2510	fig|500638.4.peg.669	fig|636.4.peg.215
ETAE_0560	yfiF	Unknown	putative tRNA/rRNA methyltransferase	fig|718251.4.peg.523	fig|667120.3.peg.1775	fig|67780.5.peg.2558	fig|634503.5.peg.604	fig|667121.3.peg.2511	fig|500638.4.peg.670	fig|636.4.peg.216
ETAE_0561	arcA	Cytoplasmic	DNA-binding response regulator in two-component regulatory system with ArcB or CpxA	fig|718251.4.peg.524	fig|667120.3.peg.1776	fig|67780.5.peg.2563	fig|634503.5.peg.609	fig|667121.3.peg.3271	fig|500638.4.peg.671	fig|636.4.peg.217
ETAE_0563	lasT	Unknown	hypothetical tRNA/rRNA methyltransferase	fig|718251.4.peg.525	fig|667120.3.peg.1778	fig|67780.5.peg.2564	fig|634503.5.peg.610	fig|667121.3.peg.3272	fig|500638.4.peg.672	fig|636.4.peg.218
ETAE_0565	thrA	Unknown	bifunctional aspartokinase I/homeserine dehydrogenase I	fig|718251.4.peg.527	fig|667120.3.peg.1781	fig|67780.5.peg.2565	fig|634503.5.peg.611	fig|667121.3.peg.3273	fig|500638.4.peg.673	fig|636.4.peg.219
ETAE_0566	thrB	Cytoplasmic	homoserine kinase	fig|718251.4.peg.528	fig|667120.3.peg.1782	fig|67780.5.peg.2566	fig|634503.5.peg.612	fig|667121.3.peg.3274	fig|500638.4.peg.674	fig|636.4.peg.220
ETAE_0567	thrC	Unknown	threonine synthase	fig|718251.4.peg.529	fig|667120.3.peg.1783	fig|67780.5.peg.2567	fig|634503.5.peg.613	fig|667121.3.peg.3275	fig|500638.4.peg.675	fig|636.4.peg.221
ETAE_0568		Unknown	hypothetical protein	fig|718251.4.peg.530	fig|667120.3.peg.1784	fig|67780.5.peg.2568	fig|634503.5.peg.614	fig|667121.3.peg.3276	fig|500638.4.peg.676	fig|636.4.peg.222
ETAE_0569		CytoplasmicMembrane	hypothetical protein	fig|718251.4.peg.531	fig|667120.3.peg.1785	fig|67780.5.peg.2570	fig|634503.5.peg.616	fig|667121.3.peg.3277	fig|500638.4.peg.677	fig|636.4.peg.223
ETAE_0570	talB	Unknown	transaldolase B	fig|718251.4.peg.532	fig|667120.3.peg.1786	fig|67780.5.peg.2571	fig|634503.5.peg.617	fig|667121.3.peg.3278	fig|500638.4.peg.678	fig|636.4.peg.224
ETAE_0572		Cytoplasmic	putative hydrolase, haloacid dehalogenase-like family	fig|718251.4.peg.534	fig|667120.3.peg.1790	fig|67780.5.peg.2574	fig|634503.5.peg.620	fig|667121.3.peg.3280	fig|500638.4.peg.680	fig|636.4.peg.226
ETAE_0573	mogA	Unknown	molybdenum cofactor biosynthesis protein	fig|718251.4.peg.535	fig|667120.3.peg.1791	fig|67780.5.peg.2575	fig|634503.5.peg.621	fig|667121.3.peg.3281	fig|500638.4.peg.681	fig|636.4.peg.227
ETAE_0574		CytoplasmicMembrane	putative proline/betaine transport protein	fig|718251.4.peg.536	fig|667120.3.peg.1792	fig|67780.5.peg.2576	fig|634503.5.peg.622	fig|667121.3.peg.3282	fig|500638.4.peg.682	fig|636.4.peg.228
ETAE_0575		CytoplasmicMembrane	putative membrane protein	fig|718251.4.peg.537	fig|667120.3.peg.1793	fig|67780.5.peg.2577	fig|634503.5.peg.623	fig|667121.3.peg.3283	fig|500638.4.peg.683	fig|636.4.peg.1149
ETAE_0576	dnaK	Cytoplasmic	molecular chaperone	fig|718251.4.peg.538	fig|667120.3.peg.1794	fig|67780.5.peg.2578	fig|634503.5.peg.624	fig|667121.3.peg.2164	fig|500638.4.peg.684	fig|636.4.peg.1150
ETAE_0577	dnaJ	Cytoplasmic	DnaJ-class molecular chaperone with C-terminal Zn finger domain	fig|718251.4.peg.539	fig|667120.3.peg.1795	fig|67780.5.peg.2579	fig|634503.5.peg.625	fig|667121.3.peg.2163	fig|500638.4.peg.685	fig|636.4.peg.1151
ETAE_0578	nhaA	CytoplasmicMembrane	Na+/H+ antiporter	fig|718251.4.peg.540	fig|667120.3.peg.1796	fig|67780.5.peg.2580	fig|634503.5.peg.626	fig|667121.3.peg.2162	fig|500638.4.peg.686	fig|636.4.peg.1152
ETAE_0579	nhaR	Cytoplasmic	transcriptional regulator, LysR family	fig|718251.4.peg.541	fig|667120.3.peg.1797	fig|67780.5.peg.2581	fig|634503.5.peg.627	fig|667121.3.peg.2161	fig|500638.4.peg.687	fig|636.4.peg.1153
ETAE_0581	ribF	Cytoplasmic	bifunctional riboflavin kinase/FMN adenylyltransferase	fig|718251.4.peg.543	fig|667120.3.peg.1799	fig|67780.5.peg.2584	fig|634503.5.peg.630	fig|667121.3.peg.2159	fig|500638.4.peg.689	fig|636.4.peg.1155
ETAE_0582	ileS	Cytoplasmic	isoleucyl-tRNA synthetase	fig|718251.4.peg.544	fig|667120.3.peg.1800	fig|67780.5.peg.2585	fig|634503.5.peg.631	fig|667121.3.peg.2158	fig|500638.4.peg.690	fig|636.4.peg.1156
ETAE_0583	lspA	CytoplasmicMembrane	lipoprotein signal peptidase	fig|718251.4.peg.545	fig|667120.3.peg.1801	fig|67780.5.peg.2586	fig|634503.5.peg.632	fig|667121.3.peg.2157	fig|500638.4.peg.691	fig|636.4.peg.1157
ETAE_0584		Unknown	putative FKBP-type peptidyl-prolyl cis-trans isomerases 2	fig|718251.4.peg.546	fig|667120.3.peg.1802	fig|67780.5.peg.2587	fig|634503.5.peg.633	fig|667121.3.peg.2156	fig|500638.4.peg.692	fig|636.4.peg.1158
ETAE_0585	ispH	Unknown	4-hydroxy-3-methylbut-2-enyl diphosphate reductase	fig|718251.4.peg.547	fig|667120.3.peg.1803	fig|67780.5.peg.2588	fig|634503.5.peg.634	fig|667121.3.peg.2155	fig|500638.4.peg.693	fig|636.4.peg.1159
ETAE_0586		Periplasmic	putative outer membrane protein	fig|718251.4.peg.1890	fig|667120.3.peg.1804	fig|67780.5.peg.2589	fig|634503.5.peg.635	fig|667121.3.peg.2154	fig|500638.4.peg.694	fig|636.4.peg.1160
ETAE_0587	xdhC	Cytoplasmic	xanthine dehydrogenase, Fe-S binding subunit	fig|718251.4.peg.549	fig|667120.3.peg.1805	fig|67780.5.peg.2590	fig|634503.5.peg.636	fig|667121.3.peg.2153	fig|500638.4.peg.695	fig|636.4.peg.1161
ETAE_0588	xdhB	Cytoplasmic	xanthine dehydrogenase, FAD-binding subunit	fig|718251.4.peg.550	fig|667120.3.peg.1806	fig|67780.5.peg.2591	fig|634503.5.peg.637	fig|667121.3.peg.2152	fig|500638.4.peg.696	fig|636.4.peg.1162
ETAE_0589	xdhA	Cytoplasmic	xanthine dehydrogenase subunit	fig|718251.4.peg.551	fig|667120.3.peg.1807	fig|67780.5.peg.2592	fig|634503.5.peg.638	fig|667121.3.peg.2151	fig|500638.4.peg.697	fig|636.4.peg.1163
ETAE_0591	dapB	Cytoplasmic	dihydrodipicolinate reductase	fig|718251.4.peg.552	fig|667120.3.peg.1809	fig|67780.5.peg.2593	fig|634503.5.peg.639	fig|667121.3.peg.2149	fig|500638.4.peg.1393	fig|636.4.peg.1165
ETAE_0593	carA	Cytoplasmic	carbamoylphosphate synthase small subunit	fig|718251.4.peg.553	fig|667120.3.peg.1811	fig|67780.5.peg.2595	fig|634503.5.peg.641	fig|667121.3.peg.2148	fig|500638.4.peg.1395	fig|636.4.peg.1167
ETAE_0594	carB	Unknown	carbamoylphosphate synthase large subunit	fig|718251.4.peg.554	fig|667120.3.peg.1812	fig|67780.5.peg.2596	fig|634503.5.peg.642	fig|667121.3.peg.2147	fig|500638.4.peg.1396	fig|636.4.peg.1168
ETAE_0595		CytoplasmicMembrane	putative membrane protein	fig|718251.4.peg.555	fig|667120.3.peg.1813	fig|67780.5.peg.2597	fig|634503.5.peg.643	fig|667121.3.peg.2146	fig|500638.4.peg.1397	fig|636.4.peg.1169
ETAE_0596		CytoplasmicMembrane	conserved hypothetical protein	fig|718251.4.peg.556	fig|667120.3.peg.1814	fig|67780.5.peg.2598	fig|634503.5.peg.644	fig|667121.3.peg.2145	fig|500638.4.peg.1398	fig|636.4.peg.1170
ETAE_0598	apaH	Unknown	diadenosinetetraphosphatase	fig|718251.4.peg.558	fig|667120.3.peg.1816	fig|67780.5.peg.2600	fig|634503.5.peg.646	fig|667121.3.peg.3181	fig|500638.4.peg.1400	fig|636.4.peg.1172
ETAE_0599	apaG	Unknown	conserved ApaG protein homologue affecting Mg2+/Co2+ transport	fig|718251.4.peg.559	fig|667120.3.peg.1817	fig|67780.5.peg.2601	fig|634503.5.peg.647	fig|667121.3.peg.3180	fig|500638.4.peg.1401	fig|636.4.peg.1173
ETAE_0600	ksgA	Cytoplasmic	dimethyladenosine transferase (rRNA methylation)	fig|718251.4.peg.560	fig|667120.3.peg.1818	fig|67780.5.peg.2602	fig|634503.5.peg.648	fig|667121.3.peg.3179	fig|500638.4.peg.1402	fig|636.4.peg.1174
ETAE_0601	pdxA	Cytoplasmic	4-hydroxythreonine-4-phosphate dehydrogenase	fig|718251.4.peg.561	fig|667120.3.peg.1819	fig|67780.5.peg.2603	fig|634503.5.peg.649	fig|667121.3.peg.3178	fig|500638.4.peg.1403	fig|636.4.peg.1175
ETAE_0602	surA	Periplasmic	peptidyl-prolyl cis-trans isomerase	fig|718251.4.peg.562	fig|667120.3.peg.1820	fig|67780.5.peg.2604	fig|634503.5.peg.650	fig|667121.3.peg.3177	fig|500638.4.peg.1404	fig|636.4.peg.1176
ETAE_0603	imp	OuterMembrane	LPS-assembly protein	fig|718251.4.peg.563	fig|667120.3.peg.1821	fig|67780.5.peg.2605	fig|634503.5.peg.651	fig|667121.3.peg.3176	fig|500638.4.peg.1405	fig|636.4.peg.1177
ETAE_0604	djlA	Cytoplasmic	DnaJ-domain-containing proteins 1	fig|718251.4.peg.564	fig|667120.3.peg.1822	fig|67780.5.peg.2606	fig|634503.5.peg.652	fig|667121.3.peg.3175	fig|500638.4.peg.1406	fig|636.4.peg.1178
ETAE_0605	rluA	Cytoplasmic	ribosomal large subunit pseudouridine synthase A	fig|718251.4.peg.565	fig|667120.3.peg.1823	fig|67780.5.peg.2607	fig|634503.5.peg.653	fig|667121.3.peg.3174	fig|500638.4.peg.1407	fig|636.4.peg.1179
ETAE_0606	hepA	Cytoplasmic	ATP-dependent helicase	fig|718251.4.peg.566	fig|667120.3.peg.1824	fig|67780.5.peg.2608	fig|634503.5.peg.654	fig|667121.3.peg.3173	fig|500638.4.peg.1408	fig|636.4.peg.1180
ETAE_0607	polB	CytoplasmicMembrane	DNA polymerase II	fig|718251.4.peg.567	fig|667120.3.peg.1825	fig|67780.5.peg.2609	fig|634503.5.peg.655	fig|667121.3.peg.3172	fig|500638.4.peg.1409	fig|636.4.peg.1181
ETAE_0608	thiQ	Unknown	thiamin transporter ATP-binding subunit	fig|718251.4.peg.568	fig|667120.3.peg.1826	fig|67780.5.peg.2610	fig|634503.5.peg.656	fig|667121.3.peg.3171	fig|500638.4.peg.1410	fig|636.4.peg.1182
ETAE_0610	tbpA	Periplasmic	thiamin transporter substrate binding subunit	fig|718251.4.peg.570	fig|667120.3.peg.1828	fig|67780.5.peg.2612	fig|634503.5.peg.658	fig|667121.3.peg.2858	fig|500638.4.peg.1412	fig|636.4.peg.1184
ETAE_0611		Cytoplasmic	conserved hypothetical protein	fig|718251.4.peg.571	fig|667120.3.peg.1829	fig|67780.5.peg.2613	fig|634503.5.peg.659	fig|667121.3.peg.2857	fig|500638.4.peg.1413	fig|636.4.peg.1185
ETAE_0618	leuD	Unknown	3-isopropylmalate dehydratase small subunit	fig|718251.4.peg.578	fig|667120.3.peg.1838	fig|67780.5.peg.2622	fig|634503.5.peg.667	fig|667121.3.peg.2855	fig|500638.4.peg.1415	fig|636.4.peg.1187
ETAE_0619	leuC	Cytoplasmic	3-isopropylmalate dehydratase large subunit	fig|718251.4.peg.579	fig|667120.3.peg.1839	fig|67780.5.peg.2623	fig|634503.5.peg.668	fig|667121.3.peg.2854	fig|500638.4.peg.1416	fig|636.4.peg.1188
ETAE_0620	leuB	Cytoplasmic	3-isopropylmalate dehydrogenase	fig|718251.4.peg.580	fig|667120.3.peg.1840	fig|67780.5.peg.2624	fig|634503.5.peg.669	fig|667121.3.peg.2853	fig|500638.4.peg.1417	fig|636.4.peg.1189
ETAE_0621	leuA	Cytoplasmic	2-isopropylmalate synthase	fig|718251.4.peg.581	fig|667120.3.peg.1841	fig|67780.5.peg.2625	fig|634503.5.peg.670	fig|667121.3.peg.2852	fig|500638.4.peg.1418	fig|636.4.peg.1190
ETAE_0623	leuO	Cytoplasmic	leucine transcriptional activator	fig|718251.4.peg.582	fig|667120.3.peg.1843	fig|67780.5.peg.2626	fig|634503.5.peg.671	fig|667121.3.peg.2850	fig|500638.4.peg.1419	fig|636.4.peg.1191
ETAE_0624	fadD	CytoplasmicMembrane	long-chain acyl-CoA synthetase	fig|718251.4.peg.583	fig|667120.3.peg.1844	fig|67780.5.peg.2627	fig|634503.5.peg.672	fig|667121.3.peg.2849	fig|500638.4.peg.1420	fig|636.4.peg.1192
ETAE_0625	ilvI	Unknown	acetolactate synthase 3 catalytic subunit	fig|718251.4.peg.584	fig|667120.3.peg.1845	fig|67780.5.peg.2628	fig|634503.5.peg.673	fig|667121.3.peg.2848	fig|500638.4.peg.1421	fig|636.4.peg.1193
ETAE_0626	ilvH	Cytoplasmic	acetolactate synthase 3 regulatory subunit	fig|718251.4.peg.585	fig|667120.3.peg.1846	fig|67780.5.peg.2629	fig|634503.5.peg.674	fig|667121.3.peg.2847	fig|500638.4.peg.1422	fig|636.4.peg.1194
ETAE_0627	fruR	Cytoplasmic	DNA-binding transcriptional regulator	fig|718251.4.peg.586	fig|667120.3.peg.1847	fig|67780.5.peg.2630	fig|634503.5.peg.675	fig|667121.3.peg.2846	fig|500638.4.peg.1423	fig|636.4.peg.1195
ETAE_0628		Cytoplasmic	conserved hypothetical protein	fig|718251.4.peg.587	fig|667120.3.peg.1848	fig|67780.5.peg.2632	fig|634503.5.peg.676	fig|667121.3.peg.2844	fig|500638.4.peg.1425	fig|636.4.peg.1196
ETAE_0629	mraW	Cytoplasmic	S-adenosyl-methyltransferase	fig|718251.4.peg.588	fig|667120.3.peg.1849	fig|67780.5.peg.2633	fig|634503.5.peg.677	fig|667121.3.peg.2843	fig|500638.4.peg.1426	fig|636.4.peg.1197
ETAE_0630	ftsL	CytoplasmicMembrane	cell division protein	fig|718251.4.peg.589	fig|667120.3.peg.1850	fig|67780.5.peg.2634	fig|634503.5.peg.678	fig|667121.3.peg.2842	fig|500638.4.peg.1427	fig|636.4.peg.1198
ETAE_0631	ftsI	CytoplasmicMembrane	peptidoglycan synthetase/penicillin-binding protein 2	fig|718251.4.peg.590	fig|667120.3.peg.1851	fig|67780.5.peg.2635	fig|634503.5.peg.679	fig|667121.3.peg.2841	fig|500638.4.peg.1428	fig|636.4.peg.1199
ETAE_0632	murE	Unknown	UDP-N-acetylmuramyl tripeptide synthase	fig|718251.4.peg.592	fig|667120.3.peg.1852	fig|67780.5.peg.2636	fig|634503.5.peg.680	fig|667121.3.peg.2840	fig|500638.4.peg.1429	fig|636.4.peg.1200
ETAE_0658	pdhR	Cytoplasmic	pyruvate dehydrogenase complex repressor	fig|718251.4.peg.619	fig|667120.3.peg.1878	fig|67780.5.peg.2662	fig|634503.5.peg.706	fig|667121.3.peg.656	fig|500638.4.peg.1455	fig|636.4.peg.1226
ETAE_0659	aceE	Cytoplasmic	pyruvate dehydrogenase subunit E1	fig|718251.4.peg.620	fig|667120.3.peg.1879	fig|67780.5.peg.2663	fig|634503.5.peg.707	fig|667121.3.peg.655	fig|500638.4.peg.1456	fig|636.4.peg.1227
ETAE_0662	lpdA	Cytoplasmic	dihydrolipoamide dehydrogenase	fig|718251.4.peg.622	fig|667120.3.peg.1881	fig|67780.5.peg.2665	fig|634503.5.peg.709	fig|667121.3.peg.2410	fig|500638.4.peg.1458	fig|636.4.peg.877
ETAE_0663		Unknown	hypothetical protein	fig|718251.4.peg.623	fig|667120.3.peg.1882	fig|67780.5.peg.2666	fig|634503.5.peg.710	fig|667121.3.peg.2409	fig|500638.4.peg.1459	fig|636.4.peg.2374
ETAE_0665	acnB	Unknown	bifunctional aconitate hydratase 2/2-methylisocitrate dehydratase	fig|718251.4.peg.624	fig|667120.3.peg.1883	fig|67780.5.peg.2668	fig|634503.5.peg.712	fig|667121.3.peg.2408	fig|500638.4.peg.2148	fig|636.4.peg.2373
ETAE_0667		Unknown	conserved hypothetical protein	fig|718251.4.peg.626	fig|667120.3.peg.1885	fig|67780.5.peg.2670	fig|634503.5.peg.714	fig|667121.3.peg.2406	fig|500638.4.peg.2150	fig|636.4.peg.2371
ETAE_0669		Unknown	conserved hypothetical protein	fig|718251.4.peg.628	fig|667120.3.peg.1887	fig|67780.5.peg.2672	fig|634503.5.peg.716	fig|667121.3.peg.2404	fig|500638.4.peg.2152	fig|636.4.peg.2369
ETAE_0670	hpt	Cytoplasmic	hypoxanthine-guanine phosphoribosyltransferase	fig|718251.4.peg.629	fig|667120.3.peg.1888	fig|67780.5.peg.2673	fig|634503.5.peg.717	fig|667121.3.peg.2403	fig|500638.4.peg.2153	fig|636.4.peg.2368
ETAE_0671	cynT	Cytoplasmic	carbonic anhydrase	fig|718251.4.peg.630	fig|667120.3.peg.1889	fig|67780.5.peg.2674	fig|634503.5.peg.718	fig|667121.3.peg.2402	fig|500638.4.peg.2154	fig|636.4.peg.2367
ETAE_0672	creB	Cytoplasmic	DNA-binding response regulator	fig|718251.4.peg.631	fig|667120.3.peg.1890	fig|67780.5.peg.2675	fig|634503.5.peg.719	fig|667121.3.peg.2401	fig|500638.4.peg.2155	fig|636.4.peg.2366
ETAE_0673		CytoplasmicMembrane	antibiotic transport system ATP-binding protein	fig|718251.4.peg.632	fig|667120.3.peg.1891	fig|67780.5.peg.2676	fig|634503.5.peg.720	fig|667121.3.peg.2400	fig|500638.4.peg.2156	fig|636.4.peg.2365
ETAE_0674		CytoplasmicMembrane	antibiotic transport system permease protein	fig|718251.4.peg.633	fig|667120.3.peg.1892	fig|67780.5.peg.2677	fig|634503.5.peg.721	fig|667121.3.peg.2399	fig|500638.4.peg.2157	fig|636.4.peg.2364
ETAE_0675	sgaA	Unknown	putative PTS system IIA component	fig|718251.4.peg.634	fig|667120.3.peg.1893	fig|67780.5.peg.2678	fig|634503.5.peg.722	fig|667121.3.peg.2398	fig|500638.4.peg.2158	fig|636.4.peg.2363
ETAE_0677		Cytoplasmic	hypothetical GlpR, transcriptional regulators of sugar metabolism	fig|718251.4.peg.635	fig|667120.3.peg.1894	fig|67780.5.peg.2679	fig|634503.5.peg.723	fig|667121.3.peg.2397	fig|500638.4.peg.2159	fig|636.4.peg.2362
ETAE_0679	agaV	Cytoplasmic	PTS system, N-acetylgalactosamine-specific IIB	fig|718251.4.peg.637	fig|667120.3.peg.1896	fig|67780.5.peg.2681	fig|634503.5.peg.725	fig|667121.3.peg.2395	fig|500638.4.peg.2161	fig|636.4.peg.2360
ETAE_0680	agaC	CytoplasmicMembrane	PTS system, N-acetylgalactosamine-specific IIC	fig|718251.4.peg.638	fig|667120.3.peg.1897	fig|67780.5.peg.2682	fig|634503.5.peg.726	fig|667121.3.peg.2394	fig|500638.4.peg.2162	fig|636.4.peg.2359
ETAE_0681	agaD	CytoplasmicMembrane	PTS system, N-acetylgalactosamine-specific IID	fig|718251.4.peg.639	fig|667120.3.peg.1898	fig|67780.5.peg.2683	fig|634503.5.peg.727	fig|667121.3.peg.2393	fig|500638.4.peg.2163	fig|636.4.peg.2358
ETAE_0683		Unknown	conserved hypothetical protein	fig|718251.4.peg.641	fig|667120.3.peg.1900	fig|67780.5.peg.2687	fig|634503.5.peg.731	fig|667121.3.peg.2512	fig|500638.4.peg.2166	fig|636.4.peg.2355
ETAE_0685	panD	Unknown	Aspartate 1-decarboxylase	fig|718251.4.peg.643	fig|667120.3.peg.1902	fig|67780.5.peg.2688	fig|634503.5.peg.733	fig|667121.3.peg.2514	fig|500638.4.peg.2168	fig|636.4.peg.2353
ETAE_0686	panC	Cytoplasmic	pantoate--beta-alanine ligase	fig|718251.4.peg.644	fig|667120.3.peg.1903	fig|67780.5.peg.2689	fig|634503.5.peg.734	fig|667121.3.peg.2515	fig|500638.4.peg.2169	fig|636.4.peg.2352
ETAE_0687	panB	Cytoplasmic	3-methyl-2-oxobutanoate hydroxymethyltransferase	fig|718251.4.peg.645	fig|667120.3.peg.1904	fig|67780.5.peg.2690	fig|634503.5.peg.735	fig|667121.3.peg.2516	fig|500638.4.peg.2170	fig|636.4.peg.2351
ETAE_0688	folK	Unknown	2-amino-4-hydroxy-6-hydroxymethyldihydropteridine	fig|718251.4.peg.646	fig|667120.3.peg.1905	fig|67780.5.peg.2691	fig|634503.5.peg.736	fig|667121.3.peg.2517	fig|500638.4.peg.2269	fig|636.4.peg.2350
ETAE_0689	pcnB	Cytoplasmic	tRNA nucleotidyltransferase/poly(A) polymerase	fig|718251.4.peg.647	fig|667120.3.peg.1906	fig|67780.5.peg.2692	fig|634503.5.peg.737	fig|667121.3.peg.2518	fig|500638.4.peg.2270	fig|636.4.peg.2349
ETAE_0690	yadB	Cytoplasmic	glutamyl-Q tRNA (Asp) synthetase	fig|718251.4.peg.648	fig|667120.3.peg.1907	fig|67780.5.peg.2693	fig|634503.5.peg.738	fig|667121.3.peg.2519	fig|500638.4.peg.2271	fig|636.4.peg.2348
ETAE_0691	dksA	Cytoplasmic	DnaK transcriptional regulator	fig|718251.4.peg.649	fig|667120.3.peg.1908	fig|67780.5.peg.2694	fig|634503.5.peg.739	fig|667121.3.peg.2520	fig|500638.4.peg.2272	fig|636.4.peg.2347
ETAE_0692	sfsA	Cytoplasmic	sugar fermentation stimulation protein A	fig|718251.4.peg.650	fig|667120.3.peg.1909	fig|67780.5.peg.2695	fig|634503.5.peg.740	fig|667121.3.peg.2521	fig|500638.4.peg.2273	fig|636.4.peg.2346
ETAE_0693	ligT	Unknown	2'-5' RNA ligase	fig|718251.4.peg.651	fig|667120.3.peg.1910	fig|67780.5.peg.2696	fig|634503.5.peg.741	fig|667121.3.peg.2522	fig|500638.4.peg.2274	fig|636.4.peg.2345
ETAE_0695	mrcB	Unknown	penicillin-binding protein 1b	fig|718251.4.peg.653	fig|667120.3.peg.1912	fig|67780.5.peg.2698	fig|634503.5.peg.743	fig|667121.3.peg.2524	fig|500638.4.peg.2386	fig|636.4.peg.2343
ETAE_0716		Unknown	ThiF family protein	fig|718251.4.peg.674	fig|667120.3.peg.2160	fig|67780.5.peg.2034	fig|634503.5.peg.762	fig|667121.3.peg.2467	fig|500638.4.peg.2623	fig|636.4.peg.2323
ETAE_0717		Cytoplasmic	conserved hypothetical protein	fig|718251.4.peg.675	fig|667120.3.peg.2161	fig|67780.5.peg.2033	fig|634503.5.peg.763	fig|667121.3.peg.2466	fig|500638.4.peg.2624	fig|636.4.peg.2322
ETAE_0718	csdA	Unknown	cysteine sulfinate desulfinase	fig|718251.4.peg.676	fig|667120.3.peg.2162	fig|67780.5.peg.2032	fig|634503.5.peg.764	fig|667121.3.peg.2465	fig|500638.4.peg.2625	fig|636.4.peg.2321
ETAE_0719	gcvA	Cytoplasmic	DNA-binding transcriptional activator	fig|718251.4.peg.677	fig|667120.3.peg.2163	fig|67780.5.peg.2031	fig|634503.5.peg.765	fig|667121.3.peg.2464	fig|500638.4.peg.2626	fig|636.4.peg.2320
ETAE_0720		CytoplasmicMembrane	putative membrane protein	fig|718251.4.peg.678	fig|667120.3.peg.2164	fig|67780.5.peg.2030	fig|634503.5.peg.766	fig|667121.3.peg.2463	fig|500638.4.peg.2627	fig|636.4.peg.2319
ETAE_0721		Unknown	conserved hypothetical protein	fig|718251.4.peg.679	fig|667120.3.peg.2165	fig|67780.5.peg.2029	fig|634503.5.peg.767	fig|667121.3.peg.2462	fig|500638.4.peg.2628	fig|636.4.peg.2318
ETAE_0722	xni	Cytoplasmic	exonuclease IX	fig|718251.4.peg.680	fig|667120.3.peg.2166	fig|67780.5.peg.2028	fig|634503.5.peg.768	fig|667121.3.peg.2461	fig|500638.4.peg.2629	fig|636.4.peg.2317
ETAE_0723		Cytoplasmic	conserved hypothetical protein	fig|718251.4.peg.681	fig|667120.3.peg.2167	fig|67780.5.peg.2027	fig|634503.5.peg.769	fig|667121.3.peg.2460	fig|500638.4.peg.2630	fig|636.4.peg.2316
ETAE_0724		Unknown	conserved hypothetical protein	fig|718251.4.peg.682	fig|667120.3.peg.2168	fig|67780.5.peg.2026	fig|634503.5.peg.770	fig|667121.3.peg.2459	fig|500638.4.peg.2631	fig|636.4.peg.2315
ETAE_0725		Cytoplasmic	conserved hypothetical protein	fig|718251.4.peg.683	fig|667120.3.peg.2169	fig|67780.5.peg.2025	fig|634503.5.peg.771	fig|667121.3.peg.2458	fig|500638.4.peg.2632	fig|636.4.peg.2314
ETAE_0726		Unknown	conserved hypothetical protein	fig|718251.4.peg.684	fig|667120.3.peg.2170	fig|67780.5.peg.2024	fig|634503.5.peg.772	fig|667121.3.peg.2457	fig|500638.4.peg.2633	fig|636.4.peg.2313
ETAE_0727	truC	Cytoplasmic	tRNA pseudouridine synthase C	fig|718251.4.peg.685	fig|667120.3.peg.2171	fig|67780.5.peg.2023	fig|634503.5.peg.773	fig|667121.3.peg.2456	fig|500638.4.peg.2634	fig|636.4.peg.2312
ETAE_0728		Cytoplasmic	putative flavodoxins	fig|718251.4.peg.686	fig|667120.3.peg.2172	fig|67780.5.peg.2022	fig|634503.5.peg.774	fig|667121.3.peg.2455	fig|500638.4.peg.2635	fig|636.4.peg.2311
ETAE_0729		Cytoplasmic	conserved hypothetical protein	fig|718251.4.peg.687	fig|667120.3.peg.2173	fig|67780.5.peg.2021	fig|634503.5.peg.775	fig|667121.3.peg.2454	fig|500638.4.peg.2636	fig|636.4.peg.2310
ETAE_0734	dapD	Cytoplasmic	2,3,4,5-tetrahydropyridine-2-carboxylate N-succinyltransferase	fig|718251.4.peg.692	fig|667120.3.peg.2174	fig|67780.5.peg.2020	fig|634503.5.peg.776	fig|667121.3.peg.2453	fig|500638.4.peg.2637	fig|636.4.peg.2309
ETAE_0735	glnD	CytoplasmicMembrane	PII uridylyl-transferase	fig|718251.4.peg.693	fig|667120.3.peg.2175	fig|67780.5.peg.2019	fig|634503.5.peg.777	fig|667121.3.peg.2452	fig|500638.4.peg.2638	fig|636.4.peg.2308
ETAE_0736	map	Cytoplasmic	methionine aminopeptidase	fig|718251.4.peg.694	fig|667120.3.peg.2176	fig|67780.5.peg.2018	fig|634503.5.peg.778	fig|667121.3.peg.2451	fig|500638.4.peg.2639	fig|636.4.peg.2307
ETAE_0737	rpsB	Cytoplasmic	30S ribosomal protein S2	fig|718251.4.peg.695	fig|667120.3.peg.2177	fig|67780.5.peg.2017	fig|634503.5.peg.779	fig|667121.3.peg.2450	fig|500638.4.peg.2640	fig|636.4.peg.2306
ETAE_0738	tsf	Cytoplasmic	translation elongation factor Ts	fig|718251.4.peg.696	fig|667120.3.peg.2178	fig|67780.5.peg.2016	fig|634503.5.peg.780	fig|667121.3.peg.2449	fig|500638.4.peg.2641	fig|636.4.peg.2305
ETAE_0739	pyrH	Unknown	uridylate kinase	fig|718251.4.peg.697	fig|667120.3.peg.2179	fig|67780.5.peg.2015	fig|634503.5.peg.781	fig|667121.3.peg.2448	fig|500638.4.peg.2642	fig|636.4.peg.2304
ETAE_0740	frr	Cytoplasmic	ribosome recycling factor	fig|718251.4.peg.698	fig|667120.3.peg.2180	fig|67780.5.peg.2014	fig|634503.5.peg.782	fig|667121.3.peg.2447	fig|500638.4.peg.2643	fig|636.4.peg.2303
ETAE_0741	dxr	Cytoplasmic	1-deoxy-D-xylulose 5-phosphate reductoisomerase	fig|718251.4.peg.699	fig|667120.3.peg.2181	fig|67780.5.peg.2012	fig|634503.5.peg.784	fig|667121.3.peg.2446	fig|500638.4.peg.2644	fig|636.4.peg.2301
ETAE_0742	uppS	Unknown	undecaprenyl pyrophosphate synthase	fig|718251.4.peg.700	fig|667120.3.peg.2182	fig|67780.5.peg.2011	fig|634503.5.peg.785	fig|667121.3.peg.2445	fig|500638.4.peg.2645	fig|636.4.peg.2300
ETAE_0743	cdsA	CytoplasmicMembrane	CDP-diglyceride synthetase	fig|718251.4.peg.701	fig|667120.3.peg.2183	fig|67780.5.peg.2010	fig|634503.5.peg.786	fig|667121.3.peg.2444	fig|500638.4.peg.2646	fig|636.4.peg.2299
ETAE_0744		CytoplasmicMembrane	putative membrane-associated zinc metalloprotease	fig|718251.4.peg.702	fig|667120.3.peg.2184	fig|67780.5.peg.2009	fig|634503.5.peg.787	fig|667121.3.peg.2443	fig|500638.4.peg.2647	fig|636.4.peg.2298
ETAE_0745		OuterMembrane	conserved outer membrane protein	fig|718251.4.peg.703	fig|667120.3.peg.2185	fig|67780.5.peg.2008	fig|634503.5.peg.788	fig|667121.3.peg.2442	fig|500638.4.peg.2648	fig|636.4.peg.2297
ETAE_0746	ompH	OuterMembrane	periplasmic chaperone	fig|718251.4.peg.704	fig|667120.3.peg.2186	fig|67780.5.peg.2007	fig|634503.5.peg.789	fig|667121.3.peg.2441	fig|500638.4.peg.2649	fig|636.4.peg.2296
ETAE_0747	lpxD	Cytoplasmic	DP-3-O-(3-hydroxymyristoyl)-glucosamine N-acyltransferase	fig|718251.4.peg.705	fig|667120.3.peg.2187	fig|67780.5.peg.2006	fig|634503.5.peg.790	fig|667121.3.peg.2440	fig|500638.4.peg.2650	fig|636.4.peg.2295
ETAE_0748	fabZ	Cytoplasmic	(3R)-hydroxymyristoyl-(acyl carrier protein) dehydratase	fig|718251.4.peg.706	fig|667120.3.peg.2188	fig|67780.5.peg.2005	fig|634503.5.peg.791	fig|667121.3.peg.2439	fig|500638.4.peg.2651	fig|636.4.peg.2294
ETAE_0749	lpxA	Cytoplasmic	UDP-N-acetylglucosamine acyltransferase	fig|718251.4.peg.707	fig|667120.3.peg.2189	fig|67780.5.peg.2004	fig|634503.5.peg.792	fig|667121.3.peg.2438	fig|500638.4.peg.2652	fig|636.4.peg.2293
ETAE_0751	rnhB	Cytoplasmic	ribonuclease HII	fig|718251.4.peg.709	fig|667120.3.peg.2191	fig|67780.5.peg.2002	fig|634503.5.peg.795	fig|667121.3.peg.2436	fig|500638.4.peg.2726	fig|636.4.peg.2291
ETAE_0753	accA	Cytoplasmic	acetyl-CoA carboxylase alpha subunit	fig|718251.4.peg.711	fig|667120.3.peg.2193	fig|67780.5.peg.2000	fig|634503.5.peg.797	fig|667121.3.peg.2434	fig|500638.4.peg.699	fig|636.4.peg.2289
ETAE_0754		Unknown	hypothetical protein	fig|718251.4.peg.712	fig|667120.3.peg.2194	fig|67780.5.peg.1999	fig|634503.5.peg.798	fig|667121.3.peg.2433	fig|500638.4.peg.700	fig|636.4.peg.2288
ETAE_0755	cadC	Unknown	DNA-binding winged-HTH domains	fig|718251.4.peg.713	fig|667120.3.peg.2195	fig|67780.5.peg.1998	fig|634503.5.peg.799	fig|667121.3.peg.2432	fig|500638.4.peg.701	fig|636.4.peg.2287
ETAE_0757	cadA	Unknown	lysine decarboxylase 1	fig|718251.4.peg.715	fig|667120.3.peg.2197	fig|67780.5.peg.1996	fig|634503.5.peg.801	fig|667121.3.peg.3034	fig|500638.4.peg.703	fig|636.4.peg.2285
ETAE_0758		CytoplasmicMembrane	hypothetical protein	fig|718251.4.peg.716	fig|667120.3.peg.2198	fig|67780.5.peg.1995	fig|634503.5.peg.802	fig|667121.3.peg.3035	fig|500638.4.peg.704	fig|636.4.peg.2284
ETAE_0759	tilS	Cytoplasmic	tRNA(Ile)-lysidine synthetase	fig|718251.4.peg.717	fig|667120.3.peg.2199	fig|67780.5.peg.1994	fig|634503.5.peg.803	fig|667121.3.peg.3036	fig|500638.4.peg.705	fig|636.4.peg.2283
ETAE_0761	rof	Cytoplasmic	Rho-binding antiterminator	fig|718251.4.peg.719	fig|667120.3.peg.2201	fig|67780.5.peg.1992	fig|634503.5.peg.805	fig|667121.3.peg.3038	fig|500638.4.peg.707	fig|636.4.peg.2281
ETAE_0762		Unknown	hypothetical protein	fig|718251.4.peg.720	fig|667120.3.peg.2202	fig|67780.5.peg.1991	fig|634503.5.peg.806	fig|667121.3.peg.3039	fig|500638.4.peg.708	fig|636.4.peg.2280
ETAE_0764		Unknown	conserved hypothetical protein	fig|718251.4.peg.722	fig|667120.3.peg.2204	fig|67780.5.peg.1989	fig|634503.5.peg.808	fig|667121.3.peg.3040	fig|500638.4.peg.709	fig|636.4.peg.2279
ETAE_0765		Unknown	conserved hypothetical protein	fig|718251.4.peg.723	fig|667120.3.peg.2205	fig|67780.5.peg.1988	fig|634503.5.peg.809	fig|667121.3.peg.3041	fig|500638.4.peg.710	fig|636.4.peg.2278
ETAE_0766	cutF	Unknown	lipoprotein involved with copper homeostasis and adhesion	fig|718251.4.peg.724	fig|667120.3.peg.2206	fig|67780.5.peg.1987	fig|634503.5.peg.810	fig|667121.3.peg.3042	fig|500638.4.peg.711	fig|636.4.peg.2277
ETAE_0767	fdx	Cytoplasmic	putative [4Fe-4S] ferredoxin	fig|718251.4.peg.725	fig|667120.3.peg.2207	fig|67780.5.peg.1986	fig|634503.5.peg.811	fig|667121.3.peg.3043	fig|500638.4.peg.712	fig|636.4.peg.2276
ETAE_0768		Unknown	putative DNA-binding transcriptional regulator	fig|718251.4.peg.726	fig|667120.3.peg.2208	fig|67780.5.peg.1977	fig|634503.5.peg.821	fig|667121.3.peg.3044	fig|500638.4.peg.713	fig|636.4.peg.2275
ETAE_0769		Unknown	hypothetical protein	fig|718251.4.peg.727	fig|667120.3.peg.2209	fig|67780.5.peg.1976	fig|634503.5.peg.822	fig|667121.3.peg.3045	fig|500638.4.peg.714	fig|636.4.peg.2274
ETAE_0771	pspE	Unknown	rhodanese-related sulfurtransferase	fig|718251.4.peg.729	fig|667120.3.peg.2211	fig|67780.5.peg.1974	fig|634503.5.peg.824	fig|667121.3.peg.80	fig|500638.4.peg.716	fig|636.4.peg.2272
ETAE_0772	tadA	Cytoplasmic	tRNA-specific adenosine deaminase	fig|718251.4.peg.730	fig|667120.3.peg.2212	fig|67780.5.peg.1973	fig|634503.5.peg.825	fig|667121.3.peg.81	fig|500638.4.peg.717	fig|636.4.peg.2271
ETAE_0773		Unknown	putative transglycosylase	fig|718251.4.peg.731	fig|667120.3.peg.2213	fig|67780.5.peg.1972	fig|634503.5.peg.826	fig|667121.3.peg.82	fig|500638.4.peg.718	fig|636.4.peg.2270
ETAE_0774	purL	Unknown	phosphoribosylformylglycinamidine synthase	fig|718251.4.peg.732	fig|667120.3.peg.2214	fig|67780.5.peg.1971	fig|634503.5.peg.827	fig|667121.3.peg.83	fig|500638.4.peg.719	fig|636.4.peg.2269
ETAE_0775	yfhK	CytoplasmicMembrane	two-component system sensor kinase	fig|718251.4.peg.733	fig|667120.3.peg.2215	fig|67780.5.peg.1970	fig|634503.5.peg.828	fig|667121.3.peg.84	fig|500638.4.peg.720	fig|636.4.peg.2268
ETAE_0786	gadB	Unknown	glutamate decarboxylase and related PLP-dependent proteins	fig|718251.4.peg.744	fig|667120.3.peg.2227	fig|67780.5.peg.1959	fig|634503.5.peg.840	fig|667121.3.peg.115	fig|500638.4.peg.779	fig|636.4.peg.2257
ETAE_0788	dinB	Cytoplasmic	DNA polymerase IV	fig|718251.4.peg.745	fig|667120.3.peg.2229	fig|67780.5.peg.2968	fig|634503.5.peg.847	fig|667121.3.peg.116	fig|500638.4.peg.780	fig|636.4.peg.2256
ETAE_0789	pepT	Cytoplasmic	peptidase T	fig|718251.4.peg.746	fig|667120.3.peg.2230	fig|67780.5.peg.2967	fig|634503.5.peg.848	fig|667121.3.peg.117	fig|500638.4.peg.781	fig|636.4.peg.2255
ETAE_0791	blc	Unknown	outer membrane lipoprotein Blc	fig|718251.4.peg.748	fig|667120.3.peg.2232	fig|67780.5.peg.2965	fig|634503.5.peg.850	fig|667121.3.peg.119	fig|500638.4.peg.807	fig|636.4.peg.2253
ETAE_0792	pepD	Unknown	aminoacyl-histidine dipeptidase	fig|718251.4.peg.749	fig|667120.3.peg.2233	fig|67780.5.peg.2964	fig|634503.5.peg.851	fig|667121.3.peg.120	fig|500638.4.peg.808	fig|636.4.peg.2252
ETAE_0793	gpt	Cytoplasmic	xanthine-guanine phosphoribosyltransferase	fig|718251.4.peg.750	fig|667120.3.peg.2235	fig|67780.5.peg.2963	fig|634503.5.peg.852	fig|667121.3.peg.121	fig|500638.4.peg.809	fig|636.4.peg.2251
ETAE_0795	crl	Cytoplasmic	DNA-binding transcriptional regulator	fig|718251.4.peg.752	fig|667120.3.peg.2237	fig|67780.5.peg.2961	fig|634503.5.peg.854	fig|667121.3.peg.123	fig|500638.4.peg.856	fig|636.4.peg.2249
ETAE_0796	proB	Cytoplasmic	gamma-glutamyl kinase	fig|718251.4.peg.753	fig|667120.3.peg.2238	fig|67780.5.peg.2960	fig|634503.5.peg.855	fig|667121.3.peg.124	fig|500638.4.peg.857	fig|636.4.peg.2248
ETAE_0797	proA	Cytoplasmic	gamma-glutamyl phosphate reductase	fig|718251.4.peg.754	fig|667120.3.peg.2239	fig|67780.5.peg.2959	fig|634503.5.peg.857	fig|667121.3.peg.125	fig|500638.4.peg.858	fig|636.4.peg.2247
ETAE_0798		Cytoplasmic	putative NADP-dependent oxidoreductases	fig|718251.4.peg.755	fig|667120.3.peg.2240	fig|67780.5.peg.2958	fig|634503.5.peg.858	fig|667121.3.peg.126	fig|500638.4.peg.859	fig|636.4.peg.2246
ETAE_0851		Cytoplasmic	putative sulfite oxidase	fig|718251.4.peg.813	fig|667120.3.peg.2481	fig|67780.5.peg.842	fig|634503.5.peg.866	fig|667121.3.peg.2640	fig|500638.4.peg.957	fig|636.4.peg.2229
ETAE_0889	katG	Unknown	putative catalase/peroxidase	fig|718251.4.peg.850	fig|667120.3.peg.2521	fig|67780.5.peg.803	fig|634503.5.peg.906	fig|667121.3.peg.2642	fig|500638.4.peg.959	fig|636.4.peg.2227
ETAE_0895	tdcC	CytoplasmicMembrane	L-threonine/L-serine permease	fig|718251.4.peg.854	fig|667120.3.peg.2525	fig|67780.5.peg.798	fig|634503.5.peg.911	fig|667121.3.peg.2645	fig|500638.4.peg.962	fig|636.4.peg.2224
ETAE_0908		Unknown	putative TonB-dependent receptor	fig|718251.4.peg.867	fig|667120.3.peg.2545	fig|67780.5.peg.225	fig|634503.5.peg.920	fig|667121.3.peg.2653	fig|500638.4.peg.1091	fig|636.4.peg.261
ETAE_0910	shlB	OuterMembrane	Hemolysin transporter protein	fig|718251.4.peg.868	fig|667120.3.peg.2547	fig|67780.5.peg.226	fig|634503.5.peg.921	fig|667121.3.peg.1095	fig|500638.4.peg.1095	fig|636.4.peg.262
ETAE_0912	dacD	CytoplasmicMembrane	D-alanyl-D-alanine carboxypeptidase	fig|718251.4.peg.870	fig|667120.3.peg.2551	fig|67780.5.peg.228	fig|634503.5.peg.924	fig|667121.3.peg.853	fig|500638.4.peg.1098	fig|636.4.peg.265
ETAE_0916	nfnB	Unknown	dihydropteridine reductase	fig|718251.4.peg.874	fig|667120.3.peg.2556	fig|67780.5.peg.230	fig|634503.5.peg.926	fig|667121.3.peg.854	fig|500638.4.peg.1099	fig|636.4.peg.266
ETAE_0917		Cytoplasmic	hypothetical protein	fig|718251.4.peg.875	fig|667120.3.peg.2557	fig|67780.5.peg.231	fig|634503.5.peg.927	fig|667121.3.peg.855	fig|500638.4.peg.1100	fig|636.4.peg.267
ETAE_0919		Cytoplasmic	putative transcriptional regulator, LysR family	fig|718251.4.peg.877	fig|667120.3.peg.2603	fig|67780.5.peg.3458	fig|634503.5.peg.931	fig|667121.3.peg.1351	fig|500638.4.peg.1101	fig|636.4.peg.268
ETAE_0923		Cytoplasmic	hypothetical protein	fig|718251.4.peg.880	fig|667120.3.peg.2606	fig|67780.5.peg.3460	fig|634503.5.peg.933	fig|667121.3.peg.1354	fig|500638.4.peg.1104	fig|636.4.peg.271
ETAE_0924	modA	Cytoplasmic	ABC-type molybdate transport system, periplasmic component	fig|718251.4.peg.881	fig|667120.3.peg.2607	fig|67780.5.peg.3461	fig|634503.5.peg.934	fig|667121.3.peg.686	fig|500638.4.peg.1105	fig|636.4.peg.272
ETAE_0925	modB	CytoplasmicMembrane	molybdenum transport system permease protein, modB	fig|718251.4.peg.882	fig|667120.3.peg.2608	fig|67780.5.peg.3462	fig|634503.5.peg.935	fig|667121.3.peg.685	fig|500638.4.peg.1106	fig|636.4.peg.273
ETAE_0926		CytoplasmicMembrane	ABC transporter ATP-binding protein	fig|718251.4.peg.883	fig|667120.3.peg.2609	fig|67780.5.peg.3463	fig|634503.5.peg.936	fig|667121.3.peg.684	fig|500638.4.peg.1107	fig|636.4.peg.274
ETAE_0928	nanA	Unknown	putative N-acetylneuraminate lyase	fig|718251.4.peg.885	fig|667120.3.peg.2611	fig|67780.5.peg.3466	fig|634503.5.peg.939	fig|667121.3.peg.681	fig|500638.4.peg.1110	fig|636.4.peg.277
ETAE_0929		Unknown	putative rpiR-family transcriptional regulatory protein	fig|718251.4.peg.886	fig|667120.3.peg.2612	fig|67780.5.peg.3467	fig|634503.5.peg.940	fig|667121.3.peg.680	fig|500638.4.peg.1111	fig|636.4.peg.278
ETAE_0930		CytoplasmicMembrane	putative sodium/glucose cotransporter	fig|718251.4.peg.887	fig|667120.3.peg.2614	fig|67780.5.peg.3468	fig|634503.5.peg.941	fig|667121.3.peg.679	fig|500638.4.peg.1112	fig|636.4.peg.279
ETAE_0939	yjjG	Unknown	putative nucleotidase	fig|718251.4.peg.894	fig|667120.3.peg.2621	fig|67780.5.peg.3478	fig|634503.5.peg.951	fig|667121.3.peg.671	fig|500638.4.peg.1120	fig|636.4.peg.287
ETAE_0941		Cytoplasmic	hypothetical protein	fig|718251.4.peg.896	fig|667120.3.peg.2623	fig|67780.5.peg.3480	fig|634503.5.peg.953	fig|667121.3.peg.669	fig|500638.4.peg.1122	fig|636.4.peg.289
ETAE_0942		Unknown	putative molybdenum-pterin-binding protein	fig|718251.4.peg.897	fig|667120.3.peg.2624	fig|67780.5.peg.3481	fig|634503.5.peg.954	fig|667121.3.peg.668	fig|500638.4.peg.1123	fig|636.4.peg.290
ETAE_0943		CytoplasmicMembrane	putative amino acid permease	fig|718251.4.peg.898	fig|667120.3.peg.2625	fig|67780.5.peg.3482	fig|634503.5.peg.955	fig|667121.3.peg.667	fig|500638.4.peg.1124	fig|636.4.peg.291
ETAE_0945	yegD	Cytoplasmic	putative chaperone	fig|718251.4.peg.899	fig|667120.3.peg.2627	fig|67780.5.peg.3483	fig|634503.5.peg.956	fig|667121.3.peg.666	fig|500638.4.peg.1182	fig|636.4.peg.292
ETAE_0946		CytoplasmicMembrane	PAS domain protein	fig|718251.4.peg.900	fig|667120.3.peg.2628	fig|67780.5.peg.3484	fig|634503.5.peg.957	fig|667121.3.peg.665	fig|500638.4.peg.1183	fig|636.4.peg.293
ETAE_0951	brnQ	CytoplasmicMembrane	branched-chain amino acid transport system II carrier protein	fig|718251.4.peg.904	fig|667120.3.peg.2633	fig|67780.5.peg.3489	fig|634503.5.peg.962	fig|667121.3.peg.660	fig|500638.4.peg.1304	fig|636.4.peg.297
ETAE_0952	proY	CytoplasmicMembrane	proline-specific permease	fig|718251.4.peg.905	fig|667120.3.peg.2634	fig|67780.5.peg.3490	fig|634503.5.peg.963	fig|667121.3.peg.659	fig|500638.4.peg.1305	fig|636.4.peg.298
ETAE_0956	ahpC	Cytoplasmic	alkyl hydroperoxide reductase, small subunit	fig|718251.4.peg.909	fig|667120.3.peg.2638	fig|67780.5.peg.3495	fig|634503.5.peg.968	fig|667121.3.peg.1020	fig|500638.4.peg.1461	fig|636.4.peg.302
ETAE_0957		Unknown	hypothetical protein	fig|718251.4.peg.910	fig|667120.3.peg.2639	fig|67780.5.peg.3496	fig|634503.5.peg.969	fig|667121.3.peg.1021	fig|500638.4.peg.1462	fig|636.4.peg.303
ETAE_0958	queA	Cytoplasmic	S-adenosylmethionine:tRNA-ribosyltransferase-isomerase (queuine synthetase)	fig|718251.4.peg.911	fig|667120.3.peg.2640	fig|67780.5.peg.3497	fig|634503.5.peg.970	fig|667121.3.peg.1022	fig|500638.4.peg.1463	fig|636.4.peg.304
ETAE_0959	tgt	Cytoplasmic	queuine/archaeosine tRNA-ribosyltransferase	fig|718251.4.peg.912	fig|667120.3.peg.2641	fig|67780.5.peg.3498	fig|634503.5.peg.971	fig|667121.3.peg.1023	fig|500638.4.peg.1464	fig|636.4.peg.305
ETAE_0960	yajC	Unknown	preprotein translocase subunit YajC	fig|718251.4.peg.913	fig|667120.3.peg.2642	fig|67780.5.peg.3499	fig|634503.5.peg.972	fig|667121.3.peg.1024	fig|500638.4.peg.1465	fig|636.4.peg.306
ETAE_0961	secD	CytoplasmicMembrane	preprotein translocase subunit SecD	fig|718251.4.peg.914	fig|667120.3.peg.2643	fig|67780.5.peg.3500	fig|634503.5.peg.973	fig|667121.3.peg.1025	fig|500638.4.peg.1466	fig|636.4.peg.307
ETAE_0962	secF	CytoplasmicMembrane	preprotein translocase subunit SecF	fig|718251.4.peg.915	fig|667120.3.peg.2644	fig|67780.5.peg.3501	fig|634503.5.peg.974	fig|667121.3.peg.1026	fig|500638.4.peg.1467	fig|636.4.peg.308
ETAE_0973		Cytoplasmic	conserved hypothetical protein	fig|718251.4.peg.927	fig|667120.3.peg.2645	fig|67780.5.peg.3514	fig|634503.5.peg.987	fig|667121.3.peg.1027	fig|500638.4.peg.1468	fig|636.4.peg.309
ETAE_0974	ribD	Unknown	riboflavin biosynthesis protein	fig|718251.4.peg.928	fig|667120.3.peg.2646	fig|67780.5.peg.3515	fig|634503.5.peg.988	fig|667121.3.peg.1028	fig|500638.4.peg.1557	fig|636.4.peg.310
ETAE_0975	ribH	Unknown	riboflavin synthase beta-chain	fig|718251.4.peg.929	fig|667120.3.peg.2647	fig|67780.5.peg.3516	fig|634503.5.peg.989	fig|667121.3.peg.1029	fig|500638.4.peg.1558	fig|636.4.peg.311
ETAE_0976	nusB	Cytoplasmic	transcription termination factor	fig|718251.4.peg.930	fig|667120.3.peg.2648	fig|67780.5.peg.3517	fig|634503.5.peg.990	fig|667121.3.peg.1030	fig|500638.4.peg.1559	fig|636.4.peg.312
ETAE_0977	thiL	Cytoplasmic	thiamine monophosphate kinase	fig|718251.4.peg.931	fig|667120.3.peg.2649	fig|67780.5.peg.3518	fig|634503.5.peg.991	fig|667121.3.peg.1031	fig|500638.4.peg.1560	fig|636.4.peg.313
ETAE_0978	pgpA	CytoplasmicMembrane	phosphatidylglycerophosphatase A	fig|718251.4.peg.932	fig|667120.3.peg.2650	fig|67780.5.peg.3519	fig|634503.5.peg.992	fig|667121.3.peg.1032	fig|500638.4.peg.1561	fig|636.4.peg.314
ETAE_0979	dxs	Cytoplasmic	1-deoxy-D-xylulose-5-phosphate synthase	fig|718251.4.peg.933	fig|667120.3.peg.2651	fig|67780.5.peg.3520	fig|634503.5.peg.993	fig|667121.3.peg.1033	fig|500638.4.peg.1562	fig|636.4.peg.315
ETAE_0980	ispA	Cytoplasmic	geranylgeranyl pyrophosphate synthase	fig|718251.4.peg.934	fig|667120.3.peg.2652	fig|67780.5.peg.3521	fig|634503.5.peg.994	fig|667121.3.peg.1034	fig|500638.4.peg.1563	fig|636.4.peg.316
ETAE_0981	xseB	Unknown	exonuclease VII small subunit	fig|718251.4.peg.935	fig|667120.3.peg.2653	fig|67780.5.peg.3522	fig|634503.5.peg.995	fig|667121.3.peg.1035	fig|500638.4.peg.1564	fig|636.4.peg.317
ETAE_0982	thiI	Cytoplasmic	thiamine biosynthesis ATP pyrophosphatase	fig|718251.4.peg.936	fig|667120.3.peg.2654	fig|67780.5.peg.3523	fig|634503.5.peg.996	fig|667121.3.peg.1036	fig|500638.4.peg.1565	fig|636.4.peg.318
ETAE_0983	thiJ	Cytoplasmic	4-methyl-5(beta-hydroxyethyl)-thiazole monophosphate biosynthesis enzyme	fig|718251.4.peg.937	fig|667120.3.peg.2660	fig|67780.5.peg.3529	fig|634503.5.peg.1002	fig|667121.3.peg.1043	fig|500638.4.peg.1707	fig|636.4.peg.324
ETAE_0984	apbA	Cytoplasmic	2-dehydropantoate 2-reductase	fig|718251.4.peg.938	fig|667120.3.peg.2671	fig|67780.5.peg.3530	fig|634503.5.peg.1003	fig|667121.3.peg.1044	fig|500638.4.peg.1708	fig|636.4.peg.325
ETAE_0985		Cytoplasmic	conserved hypothetical protein	fig|718251.4.peg.939	fig|667120.3.peg.2672	fig|67780.5.peg.3531	fig|634503.5.peg.1004	fig|667121.3.peg.1045	fig|500638.4.peg.1709	fig|636.4.peg.326
ETAE_0986		CytoplasmicMembrane	putative transporter, major facilitator family	fig|718251.4.peg.940	fig|667120.3.peg.2673	fig|67780.5.peg.3532	fig|634503.5.peg.1005	fig|667121.3.peg.1046	fig|500638.4.peg.1710	fig|636.4.peg.327
ETAE_0987	ampG	CytoplasmicMembrane	beta-lactamase induction signal transducer	fig|718251.4.peg.941	fig|667120.3.peg.2674	fig|67780.5.peg.3533	fig|634503.5.peg.1006	fig|667121.3.peg.1047	fig|500638.4.peg.1711	fig|636.4.peg.328
ETAE_0988		Unknown	conserved hypothetical protein	fig|718251.4.peg.942	fig|667120.3.peg.2675	fig|67780.5.peg.3534	fig|634503.5.peg.1007	fig|667121.3.peg.1048	fig|500638.4.peg.1712	fig|636.4.peg.329
ETAE_0989	bolA	Cytoplasmic	transcriptional regulator	fig|718251.4.peg.943	fig|667120.3.peg.2676	fig|67780.5.peg.3535	fig|634503.5.peg.1008	fig|667121.3.peg.1049	fig|500638.4.peg.1713	fig|636.4.peg.330
ETAE_0990	tig	Cytoplasmic	FKBP-type peptidyl-prolyl cis-trans isomerase (trigger factor)	fig|718251.4.peg.944	fig|667120.3.peg.2677	fig|67780.5.peg.3536	fig|634503.5.peg.1009	fig|667121.3.peg.1050	fig|500638.4.peg.1714	fig|636.4.peg.331
ETAE_0991	clpP	Cytoplasmic	Protease subunit of ATP-dependent Clp proteases	fig|718251.4.peg.945	fig|667120.3.peg.2678	fig|67780.5.peg.3537	fig|634503.5.peg.1010	fig|667121.3.peg.1051	fig|500638.4.peg.1715	fig|636.4.peg.332
ETAE_0992	clpX	Cytoplasmic	ATP-dependent protease Clp, ATPase subunit	fig|718251.4.peg.946	fig|667120.3.peg.2679	fig|67780.5.peg.3538	fig|634503.5.peg.1011	fig|667121.3.peg.1052	fig|500638.4.peg.1716	fig|636.4.peg.333
ETAE_0994	lon	Cytoplasmic	ATP-dependent Lon protease, bacterial type	fig|718251.4.peg.948	fig|667120.3.peg.2680	fig|67780.5.peg.3540	fig|634503.5.peg.1013	fig|667121.3.peg.1054	fig|500638.4.peg.1718	fig|636.4.peg.335
ETAE_0995	hupB	Unknown	transcriptional regulator HU subunit beta	fig|718251.4.peg.949	fig|667120.3.peg.2681	fig|67780.5.peg.3541	fig|634503.5.peg.1014	fig|667121.3.peg.1055	fig|500638.4.peg.1719	fig|636.4.peg.336
ETAE_0996	ppiD	Unknown	peptidyl-prolyl cis-trans isomerase (rotamase D)	fig|718251.4.peg.950	fig|667120.3.peg.2682	fig|67780.5.peg.3542	fig|634503.5.peg.1015	fig|667121.3.peg.1056	fig|500638.4.peg.1720	fig|636.4.peg.337
ETAE_0998	queC	Cytoplasmic	queuosine biosynthesis protein	fig|718251.4.peg.952	fig|667120.3.peg.2684	fig|67780.5.peg.3544	fig|634503.5.peg.1017	fig|667121.3.peg.1058	fig|500638.4.peg.1722	fig|636.4.peg.339
ETAE_1000		Unknown	Cof-like hydrolase	fig|718251.4.peg.954	fig|667120.3.peg.2686	fig|67780.5.peg.3546	fig|634503.5.peg.1019	fig|667121.3.peg.1060	fig|500638.4.peg.1855	fig|636.4.peg.341
ETAE_1001		Cytoplasmic	transcriptional regulator, AsnC family	fig|718251.4.peg.955	fig|667120.3.peg.2687	fig|67780.5.peg.3547	fig|634503.5.peg.1020	fig|667121.3.peg.1061	fig|500638.4.peg.1856	fig|636.4.peg.342
ETAE_1003	glnK	Cytoplasmic	nitrogen regulatory protein P-II	fig|718251.4.peg.956	fig|667120.3.peg.2688	fig|67780.5.peg.3549	fig|634503.5.peg.1022	fig|667121.3.peg.1062	fig|500638.4.peg.1857	fig|636.4.peg.343
ETAE_1004	amtB	CytoplasmicMembrane	ammonium transporter	fig|718251.4.peg.957	fig|667120.3.peg.2689	fig|67780.5.peg.3550	fig|634503.5.peg.1023	fig|667121.3.peg.1063	fig|500638.4.peg.1858	fig|636.4.peg.344
ETAE_1005	tesB	Cytoplasmic	acyl-CoA thioesterase II	fig|718251.4.peg.958	fig|667120.3.peg.2690	fig|67780.5.peg.3551	fig|634503.5.peg.1024	fig|667121.3.peg.1064	fig|500638.4.peg.1859	fig|636.4.peg.345
ETAE_1008		Cytoplasmic	hemolysin expression modulating family protein	fig|718251.4.peg.960	fig|667120.3.peg.2692	fig|67780.5.peg.3554	fig|634503.5.peg.1027	fig|667121.3.peg.389	fig|500638.4.peg.1989	fig|636.4.peg.256
ETAE_1009		Cytoplasmic	hypothetical protein	fig|718251.4.peg.961	fig|667120.3.peg.2693	fig|67780.5.peg.3555	fig|634503.5.peg.1028	fig|667121.3.peg.390	fig|500638.4.peg.1990	fig|636.4.peg.255
ETAE_1010	acrB	CytoplasmicMembrane	RND family, acridine/multidrug efflux pump/acriflavin resistance protein B	fig|718251.4.peg.962	fig|667120.3.peg.2694	fig|67780.5.peg.3556	fig|634503.5.peg.1029	fig|667121.3.peg.391	fig|500638.4.peg.1991	fig|636.4.peg.254
ETAE_1012	acrR	Cytoplasmic	DNA-binding transcriptional repressor	fig|718251.4.peg.964	fig|667120.3.peg.2696	fig|67780.5.peg.3558	fig|634503.5.peg.1031	fig|667121.3.peg.393	fig|500638.4.peg.2084	fig|636.4.peg.252
ETAE_1013	ychN	Unknown	putative phosphatase	fig|718251.4.peg.965	fig|667120.3.peg.2697	fig|67780.5.peg.3559	fig|634503.5.peg.1032	fig|667121.3.peg.394	fig|500638.4.peg.2085	fig|636.4.peg.251
ETAE_1014	kefA	CytoplasmicMembrane	potassium efflux protein KefA	fig|718251.4.peg.966	fig|667120.3.peg.2698	fig|67780.5.peg.3560	fig|634503.5.peg.1033	fig|667121.3.peg.395	fig|500638.4.peg.2086	fig|636.4.peg.250
ETAE_1015		Unknown	hypothetical protein	fig|718251.4.peg.967	fig|667120.3.peg.2699	fig|67780.5.peg.3561	fig|634503.5.peg.1034	fig|667121.3.peg.396	fig|500638.4.peg.2087	fig|636.4.peg.249
ETAE_1016		CytoplasmicMembrane	hypothetical protein	fig|718251.4.peg.968	fig|667120.3.peg.2700	fig|67780.5.peg.3562	fig|634503.5.peg.1035	fig|667121.3.peg.397	fig|500638.4.peg.2088	fig|636.4.peg.248
ETAE_1019	apt	Cytoplasmic	adenine phosphoribosyltransferase	fig|718251.4.peg.971	fig|667120.3.peg.2704	fig|67780.5.peg.3565	fig|634503.5.peg.1038	fig|667121.3.peg.400	fig|500638.4.peg.2091	fig|636.4.peg.245
ETAE_1020	dnaX	Unknown	DNA polymerase III, subunits gamma and tau	fig|718251.4.peg.972	fig|667120.3.peg.2705	fig|67780.5.peg.3566	fig|634503.5.peg.1039	fig|667121.3.peg.401	fig|500638.4.peg.2092	fig|636.4.peg.244
ETAE_1021		Cytoplasmic	hypothetical protein	fig|718251.4.peg.973	fig|667120.3.peg.2706	fig|67780.5.peg.3567	fig|634503.5.peg.1040	fig|667121.3.peg.402	fig|500638.4.peg.2093	fig|636.4.peg.243
ETAE_1022	recR	Cytoplasmic	recombination protein	fig|718251.4.peg.974	fig|667120.3.peg.2707	fig|67780.5.peg.3568	fig|634503.5.peg.1041	fig|667121.3.peg.403	fig|500638.4.peg.2094	fig|636.4.peg.242
ETAE_1024		Cytoplasmic	heat shock protein 90	fig|718251.4.peg.975	fig|667120.3.peg.2708	fig|67780.5.peg.3581	fig|634503.5.peg.1055	fig|667121.3.peg.404	fig|500638.4.peg.2095	fig|636.4.peg.241
ETAE_1025	adk	Cytoplasmic	adenylate kinase	fig|718251.4.peg.976	fig|667120.3.peg.2709	fig|67780.5.peg.3582	fig|634503.5.peg.1056	fig|667121.3.peg.405	fig|500638.4.peg.2096	fig|636.4.peg.240
ETAE_1026	hemH	Cytoplasmic	ferrochelatase	fig|718251.4.peg.977	fig|667120.3.peg.2710	fig|67780.5.peg.3583	fig|634503.5.peg.1057	fig|667121.3.peg.406	fig|500638.4.peg.2097	fig|636.4.peg.239
ETAE_1027		Unknown	putative sugar kinase	fig|718251.4.peg.978	fig|667120.3.peg.2711	fig|67780.5.peg.3584	fig|634503.5.peg.1058	fig|667121.3.peg.407	fig|500638.4.peg.2098	fig|636.4.peg.238
ETAE_1030		Extracellular	type 1 fimbrial protein	fig|718251.4.peg.981	fig|667120.3.peg.2713	fig|67780.5.peg.3586	fig|634503.5.peg.1060	fig|667121.3.peg.408	fig|500638.4.peg.2099	fig|636.4.peg.237
ETAE_1031		Periplasmic	fimbrial chaperon protein	fig|718251.4.peg.982	fig|667120.3.peg.2714	fig|67780.5.peg.3587	fig|634503.5.peg.1061	fig|667121.3.peg.409	fig|500638.4.peg.2100	fig|636.4.peg.236
ETAE_1032		OuterMembrane	fimbrial usher protein	fig|718251.4.peg.983	fig|667120.3.peg.2715	fig|67780.5.peg.3588	fig|634503.5.peg.1062	fig|667121.3.peg.410	fig|500638.4.peg.2101	fig|636.4.peg.235
ETAE_1033		Unknown	fimbrial protein	fig|718251.4.peg.984	fig|667120.3.peg.2716	fig|67780.5.peg.3589	fig|634503.5.peg.1063	fig|667121.3.peg.411	fig|500638.4.peg.2102	fig|636.4.peg.234
ETAE_1034	ushA	Periplasmic	5'-nucleotidase / UDP-sugar diphosphatase	fig|718251.4.peg.985	fig|667120.3.peg.2717	fig|67780.5.peg.3590	fig|634503.5.peg.1064	fig|667121.3.peg.412	fig|500638.4.peg.2103	fig|636.4.peg.233
ETAE_1035		Unknown	hypothetical protein	fig|718251.4.peg.986	fig|667120.3.peg.2718	fig|67780.5.peg.3591	fig|634503.5.peg.1065	fig|667121.3.peg.413	fig|500638.4.peg.2104	fig|636.4.peg.232
ETAE_1038		Cytoplasmic	GumN family protein	fig|718251.4.peg.989	fig|667120.3.peg.2721	fig|67780.5.peg.3593	fig|634503.5.peg.1067	fig|667121.3.peg.416	fig|500638.4.peg.2107	fig|636.4.peg.229
ETAE_1039	copA	CytoplasmicMembrane	copper transporter	fig|718251.4.peg.990	fig|667120.3.peg.2722	fig|67780.5.peg.3594	fig|634503.5.peg.1068	fig|667121.3.peg.417	fig|500638.4.peg.2108	fig|636.4.peg.2810
ETAE_1041		Unknown	hypothetical protein	fig|718251.4.peg.992	fig|667120.3.peg.2724	fig|67780.5.peg.3596	fig|634503.5.peg.1070	fig|667121.3.peg.476	fig|500638.4.peg.2110	fig|636.4.peg.2808
ETAE_1042	ybbK	Unknown	putative inner membrane protein	fig|718251.4.peg.993	fig|667120.3.peg.2725	fig|67780.5.peg.3597	fig|634503.5.peg.1071	fig|667121.3.peg.475	fig|500638.4.peg.2111	fig|636.4.peg.2807
ETAE_1043		Unknown	hypothetical protein	fig|718251.4.peg.994	fig|667120.3.peg.2726	fig|67780.5.peg.3598	fig|634503.5.peg.1072	fig|667121.3.peg.474	fig|500638.4.peg.2112	fig|636.4.peg.2806
ETAE_1044		Cytoplasmic	radical SAM domain protein	fig|718251.4.peg.995	fig|667120.3.peg.2727	fig|67780.5.peg.3599	fig|634503.5.peg.1073	fig|667121.3.peg.473	fig|500638.4.peg.2113	fig|636.4.peg.2805
ETAE_1046	hcaT	CytoplasmicMembrane	putative 3-phenylpropionic acid transporter	fig|718251.4.peg.997	fig|667120.3.peg.2729	fig|67780.5.peg.3601	fig|634503.5.peg.1075	fig|667121.3.peg.471	fig|500638.4.peg.2115	fig|636.4.peg.2803
ETAE_1047	ptpS	Cytoplasmic	putative 6-pyruvoyl tetrahydrobiopterin synthase	fig|718251.4.peg.998	fig|667120.3.peg.2730	fig|67780.5.peg.3602	fig|634503.5.peg.1076	fig|667121.3.peg.470	fig|500638.4.peg.2116	fig|636.4.peg.2802
ETAE_1048	dld	Unknown	D-lactate dehydrogenase	fig|718251.4.peg.999	fig|667120.3.peg.2731	fig|67780.5.peg.3603	fig|634503.5.peg.1077	fig|667121.3.peg.469	fig|500638.4.peg.2117	fig|636.4.peg.2801
ETAE_1049		Cytoplasmic	ArsR-family transcriptional regulator	fig|718251.4.peg.1000	fig|667120.3.peg.2732	fig|67780.5.peg.3604	fig|634503.5.peg.1078	fig|667121.3.peg.468	fig|500638.4.peg.2118	fig|636.4.peg.2800
ETAE_1059	thiD	Unknown	phosphomethylpyrimidine kinase	fig|718251.4.peg.1010	fig|667120.3.peg.2738	fig|67780.5.peg.3608	fig|634503.5.peg.1082	fig|667121.3.peg.465	fig|500638.4.peg.2120	fig|636.4.peg.2797
ETAE_1060		Unknown	hypothetical protein	fig|718251.4.peg.1011	fig|667120.3.peg.2739	fig|67780.5.peg.3609	fig|634503.5.peg.1084	fig|667121.3.peg.464	fig|500638.4.peg.2121	fig|636.4.peg.2796
ETAE_1061		Unknown	inhibitor of vertebrate lysozyme	fig|718251.4.peg.1012	fig|667120.3.peg.2740	fig|67780.5.peg.3610	fig|634503.5.peg.1085	fig|667121.3.peg.463	fig|500638.4.peg.2122	fig|636.4.peg.2795
ETAE_1062	dsbA	Periplasmic	periplasmic protein disulfide isomerase I	fig|718251.4.peg.1013	fig|667120.3.peg.2741	fig|67780.5.peg.3611	fig|634503.5.peg.1086	fig|667121.3.peg.462	fig|500638.4.peg.2123	fig|636.4.peg.2794
ETAE_1064		Unknown	hypothetical protein	fig|718251.4.peg.1015	fig|667120.3.peg.2743	fig|67780.5.peg.1087	fig|634503.5.peg.1090	fig|667121.3.peg.461	fig|500638.4.peg.2124	fig|636.4.peg.2793
ETAE_1065		Cytoplasmic	putative protease	fig|718251.4.peg.1016	fig|667120.3.peg.2745	fig|67780.5.peg.1089	fig|634503.5.peg.1092	fig|667121.3.peg.460	fig|500638.4.peg.2125	fig|636.4.peg.2792
ETAE_1066		Cytoplasmic	hypothetical protein	fig|718251.4.peg.1017	fig|667120.3.peg.2746	fig|67780.5.peg.1090	fig|634503.5.peg.1093	fig|667121.3.peg.459	fig|500638.4.peg.2126	fig|636.4.peg.2791
ETAE_1067	baeR	Cytoplasmic	two-component transcriptional regulator, winged helix family	fig|718251.4.peg.1018	fig|667120.3.peg.2747	fig|67780.5.peg.1091	fig|634503.5.peg.1094	fig|667121.3.peg.458	fig|500638.4.peg.2127	fig|636.4.peg.2790
ETAE_1068	baeS	CytoplasmicMembrane	integral membrane sensor signal transduction histidine kinase	fig|718251.4.peg.1019	fig|667120.3.peg.2748	fig|67780.5.peg.1092	fig|634503.5.peg.1095	fig|667121.3.peg.457	fig|500638.4.peg.2128	fig|636.4.peg.2789
ETAE_1072		Unknown	hypothetical protein	fig|718251.4.peg.1023	fig|667120.3.peg.2753	fig|67780.5.peg.1097	fig|634503.5.peg.1101	fig|667121.3.peg.1140	fig|500638.4.peg.2132	fig|636.4.peg.2785
ETAE_1073		Cytoplasmic	onserved hypothetical mutT family protein	fig|718251.4.peg.1024	fig|667120.3.peg.2754	fig|67780.5.peg.1098	fig|634503.5.peg.1102	fig|667121.3.peg.1139	fig|500638.4.peg.2133	fig|636.4.peg.2784
ETAE_1074	rdgC	Cytoplasmic	recombination associated protein	fig|718251.4.peg.1025	fig|667120.3.peg.2755	fig|67780.5.peg.1099	fig|634503.5.peg.1103	fig|667121.3.peg.1138	fig|500638.4.peg.2134	fig|636.4.peg.2783
ETAE_1079	sbcD	Cytoplasmic	nuclease SbcCD, D subunit	fig|718251.4.peg.1030	fig|667120.3.peg.2760	fig|67780.5.peg.1105	fig|634503.5.peg.1109	fig|667121.3.peg.1133	fig|500638.4.peg.2141	fig|636.4.peg.2778
ETAE_1080	phoB	Cytoplasmic	phosphate regulon transcriptional regulatory protein	fig|718251.4.peg.1031	fig|667120.3.peg.2761	fig|67780.5.peg.1107	fig|634503.5.peg.1111	fig|667121.3.peg.1132	fig|500638.4.peg.2142	fig|636.4.peg.2777
ETAE_1081	phoR	CytoplasmicMembrane	phosphate regulon sensor protein	fig|718251.4.peg.1032	fig|667120.3.peg.2762	fig|67780.5.peg.1108	fig|634503.5.peg.1112	fig|667121.3.peg.1131	fig|500638.4.peg.2143	fig|636.4.peg.2776
ETAE_1082	ppx	Unknown	exopolyphosphatase	fig|718251.4.peg.1033	fig|667120.3.peg.2763	fig|67780.5.peg.1109	fig|634503.5.peg.1114	fig|667121.3.peg.1356	fig|500638.4.peg.2144	fig|636.4.peg.2775
ETAE_1083	ppk	Cytoplasmic	polyphosphate kinase	fig|718251.4.peg.1034	fig|667120.3.peg.2764	fig|67780.5.peg.1110	fig|634503.5.peg.1115	fig|667121.3.peg.1357	fig|500638.4.peg.2145	fig|636.4.peg.2774
ETAE_1084	speG	Cytoplasmic	spermidine acetyltransferase	fig|718251.4.peg.1035	fig|667120.3.peg.2765	fig|67780.5.peg.1111	fig|634503.5.peg.1116	fig|667121.3.peg.1358	fig|500638.4.peg.2146	fig|636.4.peg.2773
ETAE_1085	purN	Cytoplasmic	phosphoribosylglycinamide formyltransferase	fig|718251.4.peg.1036	fig|667120.3.peg.2766	fig|67780.5.peg.1112	fig|634503.5.peg.1117	fig|667121.3.peg.1359	fig|500638.4.peg.2147	fig|636.4.peg.2772
ETAE_1086	purM	Unknown	phosphoribosylformylglycinamidine cyclo-ligase	fig|718251.4.peg.1037	fig|667120.3.peg.2767	fig|67780.5.peg.1113	fig|634503.5.peg.1118	fig|667121.3.peg.1360	fig|500638.4.peg.2171	fig|636.4.peg.2771
ETAE_1087	upp	Cytoplasmic	uracil phosphoribosyltransferase	fig|718251.4.peg.1038	fig|667120.3.peg.2768	fig|67780.5.peg.1114	fig|634503.5.peg.1119	fig|667121.3.peg.1361	fig|500638.4.peg.2172	fig|636.4.peg.2770
ETAE_1088	uraA	CytoplasmicMembrane	xanthine/uracil permeases	fig|718251.4.peg.1039	fig|667120.3.peg.2769	fig|67780.5.peg.1115	fig|634503.5.peg.1120	fig|667121.3.peg.1362	fig|500638.4.peg.2173	fig|636.4.peg.2769
ETAE_1090	dnaA	Cytoplasmic	DNA replication initiation factor	fig|718251.4.peg.1041	fig|667120.3.peg.2772	fig|67780.5.peg.1116	fig|634503.5.peg.1121	fig|667121.3.peg.1363	fig|500638.4.peg.2174	fig|636.4.peg.2768
ETAE_1091		Cytoplasmic	arsenate reductase	fig|718251.4.peg.1042	fig|667120.3.peg.2773	fig|67780.5.peg.1117	fig|634503.5.peg.1122	fig|667121.3.peg.1364	fig|500638.4.peg.2175	fig|636.4.peg.2767
ETAE_1092		Unknown	putative peptidase	fig|718251.4.peg.1043	fig|667120.3.peg.2774	fig|67780.5.peg.1118	fig|634503.5.peg.1123	fig|667121.3.peg.1365	fig|500638.4.peg.2176	fig|636.4.peg.2766
ETAE_1093	perM	CytoplasmicMembrane	putative permease	fig|718251.4.peg.1044	fig|667120.3.peg.2775	fig|67780.5.peg.1119	fig|634503.5.peg.1124	fig|667121.3.peg.1366	fig|500638.4.peg.2177	fig|636.4.peg.2765
ETAE_1094	bcp	Cytoplasmic	thioredoxin-dependent thiol peroxidase	fig|718251.4.peg.1045	fig|667120.3.peg.2776	fig|67780.5.peg.1120	fig|634503.5.peg.1125	fig|667121.3.peg.1367	fig|500638.4.peg.2178	fig|636.4.peg.2764
ETAE_1095	gcvR	Cytoplasmic	glycine cleavage system transcriptional repressor	fig|718251.4.peg.1046	fig|667120.3.peg.2777	fig|67780.5.peg.1121	fig|634503.5.peg.1126	fig|667121.3.peg.1368	fig|500638.4.peg.2179	fig|636.4.peg.2763
ETAE_1096	dapA	Unknown	dihydrodipicolinate synthase	fig|718251.4.peg.1047	fig|667120.3.peg.2778	fig|67780.5.peg.1122	fig|634503.5.peg.1127	fig|667121.3.peg.1369	fig|500638.4.peg.2180	fig|636.4.peg.2762
ETAE_1098	purC	Cytoplasmic	phosphoribosylaminoimidazole-succinocarboxamide synthase	fig|718251.4.peg.1049	fig|667120.3.peg.2780	fig|67780.5.peg.1124	fig|634503.5.peg.1129	fig|667121.3.peg.1371	fig|500638.4.peg.2182	fig|636.4.peg.2760
ETAE_1102		Unknown	putative acetyltransferase	fig|718251.4.peg.1053	fig|667120.3.peg.2782	fig|67780.5.peg.1125	fig|634503.5.peg.1130	fig|667121.3.peg.1372	fig|500638.4.peg.2183	fig|636.4.peg.2759
ETAE_1105		Unknown	putative carboxypeptidase	fig|718251.4.peg.1056	fig|667120.3.peg.2785	fig|67780.5.peg.1128	fig|634503.5.peg.1133	fig|667121.3.peg.1376	fig|500638.4.peg.2186	fig|636.4.peg.2756
ETAE_1106	dapE	Cytoplasmic	succinyl-diaminopimelate desuccinylase	fig|718251.4.peg.1057	fig|667120.3.peg.2786	fig|67780.5.peg.1129	fig|634503.5.peg.1134	fig|667121.3.peg.1377	fig|500638.4.peg.2187	fig|636.4.peg.2755
ETAE_1109	acrD	CytoplasmicMembrane	aminoglycoside/multidrug efflux system	fig|718251.4.peg.1060	fig|667120.3.peg.2789	fig|67780.5.peg.1133	fig|634503.5.peg.1138	fig|667121.3.peg.1380	fig|500638.4.peg.2189	fig|636.4.peg.2753
ETAE_1110		Cytoplasmic	hypothetical protein	fig|718251.4.peg.1061	fig|667120.3.peg.2790	fig|67780.5.peg.1134	fig|634503.5.peg.1139	fig|667121.3.peg.1382	fig|500638.4.peg.2191	fig|636.4.peg.2751
ETAE_1111	narP	Cytoplasmic	two-component transcriptional regulator, LuxR family	fig|718251.4.peg.1062	fig|667120.3.peg.2791	fig|67780.5.peg.1135	fig|634503.5.peg.1140	fig|667121.3.peg.1383	fig|500638.4.peg.2192	fig|636.4.peg.2750
ETAE_1112	narQ	CytoplasmicMembrane	nitrate/nitrite sensor protein	fig|718251.4.peg.1063	fig|667120.3.peg.2792	fig|67780.5.peg.1136	fig|634503.5.peg.1141	fig|667121.3.peg.1384	fig|500638.4.peg.2193	fig|636.4.peg.2749
ETAE_1114	napF	Unknown	ferredoxin-type protein	fig|718251.4.peg.1065	fig|667120.3.peg.2793	fig|67780.5.peg.1137	fig|634503.5.peg.1142	fig|667121.3.peg.1385	fig|500638.4.peg.2194	fig|636.4.peg.2748
ETAE_1115	napD	Unknown	periplasmic nitrate reductase NapD	fig|718251.4.peg.1066	fig|667120.3.peg.2794	fig|67780.5.peg.1138	fig|634503.5.peg.1143	fig|667121.3.peg.1386	fig|500638.4.peg.2195	fig|636.4.peg.2747
ETAE_1116	napA	Periplasmic	periplasmic nitrate reductase NapA	fig|718251.4.peg.1067	fig|667120.3.peg.2795	fig|67780.5.peg.1139	fig|634503.5.peg.1144	fig|667121.3.peg.1387	fig|500638.4.peg.2196	fig|636.4.peg.2746
ETAE_1117	napG	Cytoplasmic	ferredoxin-type protein NapG	fig|718251.4.peg.1068	fig|667120.3.peg.2796	fig|67780.5.peg.1140	fig|634503.5.peg.1145	fig|667121.3.peg.1388	fig|500638.4.peg.2197	fig|636.4.peg.2745
ETAE_1118	napH	CytoplasmicMembrane	ferredoxin-type protein NapH	fig|718251.4.peg.1069	fig|667120.3.peg.2797	fig|67780.5.peg.1141	fig|634503.5.peg.1146	fig|667121.3.peg.1389	fig|500638.4.peg.2198	fig|636.4.peg.2744
ETAE_1119	napB	Periplasmic	cytochrome c-type protein NapB	fig|718251.4.peg.1070	fig|667120.3.peg.2798	fig|67780.5.peg.1142	fig|634503.5.peg.1147	fig|667121.3.peg.1390	fig|500638.4.peg.2199	fig|636.4.peg.2743
ETAE_1120	napC	CytoplasmicMembrane	cytochrome c-type protein NapC	fig|718251.4.peg.1071	fig|667120.3.peg.2799	fig|67780.5.peg.1143	fig|634503.5.peg.1148	fig|667121.3.peg.1391	fig|500638.4.peg.2200	fig|636.4.peg.2742
ETAE_1121		Cytoplasmic	putative mutT/NUDIX family protein	fig|718251.4.peg.1072	fig|667120.3.peg.2807	fig|67780.5.peg.1151	fig|634503.5.peg.1158	fig|667121.3.peg.3249	fig|500638.4.peg.2207	fig|636.4.peg.3243
ETAE_1122	maeB	Unknown	malic enzyme	fig|718251.4.peg.1073	fig|667120.3.peg.2808	fig|67780.5.peg.1152	fig|634503.5.peg.1159	fig|667121.3.peg.3248	fig|500638.4.peg.2208	fig|636.4.peg.3242
ETAE_1123		Unknown	hypothetical protein	fig|718251.4.peg.1074	fig|667120.3.peg.2809	fig|67780.5.peg.1153	fig|634503.5.peg.1160	fig|667121.3.peg.3247	fig|500638.4.peg.2209	fig|636.4.peg.3241
ETAE_1124		Unknown	hypothetical protein	fig|718251.4.peg.1075	fig|667120.3.peg.2810	fig|67780.5.peg.1154	fig|634503.5.peg.1161	fig|667121.3.peg.3246	fig|500638.4.peg.2210	fig|636.4.peg.3240
ETAE_1126	amiA	Unknown	N-acetylmuramoyl-L-alanine amidase	fig|718251.4.peg.1077	fig|667120.3.peg.2812	fig|67780.5.peg.1156	fig|634503.5.peg.1163	fig|667121.3.peg.3244	fig|500638.4.peg.2212	fig|636.4.peg.3238
ETAE_1129		Cytoplasmic	Dyp-type peroxidase family	fig|718251.4.peg.1080	fig|667120.3.peg.2816	fig|67780.5.peg.1160	fig|634503.5.peg.1167	fig|667121.3.peg.3241	fig|500638.4.peg.2214	fig|636.4.peg.3235
ETAE_1130	crr	Cytoplasmic	glucose-specific PTS system component	fig|718251.4.peg.1081	fig|667120.3.peg.2817	fig|67780.5.peg.1161	fig|634503.5.peg.1168	fig|667121.3.peg.3240	fig|500638.4.peg.2215	fig|636.4.peg.3234
ETAE_1131	ptsI	Cytoplasmic	phosphoenolpyruvate-protein phosphotransferase	fig|718251.4.peg.1082	fig|667120.3.peg.2818	fig|67780.5.peg.1162	fig|634503.5.peg.1169	fig|667121.3.peg.3239	fig|500638.4.peg.2216	fig|636.4.peg.3233
ETAE_1132	ptsH	Cytoplasmic	phosphohistidinoprotein-hexose phosphotransferase component of PTS system	fig|718251.4.peg.1083	fig|667120.3.peg.2819	fig|67780.5.peg.1163	fig|634503.5.peg.1170	fig|667121.3.peg.3238	fig|500638.4.peg.2217	fig|636.4.peg.3232
ETAE_1139	gltX	Cytoplasmic	glutamyl-tRNA synthetase	fig|718251.4.peg.1090	fig|667120.3.peg.3915	fig|67780.5.peg.2322	fig|634503.5.peg.1176	fig|667121.3.peg.495	fig|500638.4.peg.2224	fig|636.4.peg.2514
ETAE_1140		Cytoplasmic	hypothetical protein	fig|718251.4.peg.1091	fig|667120.3.peg.3914	fig|67780.5.peg.2321	fig|634503.5.peg.1177	fig|667121.3.peg.494	fig|500638.4.peg.2225	fig|636.4.peg.2515
ETAE_1141	nupC	CytoplasmicMembrane	nucleoside transport protein	fig|718251.4.peg.1092	fig|667120.3.peg.2356	fig|67780.5.peg.2716	fig|634503.5.peg.1179	fig|667121.3.peg.2080	fig|500638.4.peg.2227	fig|636.4.peg.3224
ETAE_1142	mntH	CytoplasmicMembrane	manganese transport protein	fig|718251.4.peg.1093	fig|667120.3.peg.2357	fig|67780.5.peg.2717	fig|634503.5.peg.1180	fig|667121.3.peg.2081	fig|500638.4.peg.2228	fig|636.4.peg.3223
ETAE_1144	glk	Cytoplasmic	glucokinase	fig|718251.4.peg.1095	fig|667120.3.peg.2359	fig|67780.5.peg.2719	fig|634503.5.peg.1182	fig|667121.3.peg.2083	fig|500638.4.peg.2230	fig|636.4.peg.3221
ETAE_1145		Cytoplasmic	hypothetical protein	fig|718251.4.peg.1096	fig|667120.3.peg.2360	fig|67780.5.peg.2720	fig|634503.5.peg.1183	fig|667121.3.peg.2084	fig|500638.4.peg.2231	fig|636.4.peg.3220
ETAE_1146		Unknown	hypothetical protein	fig|718251.4.peg.1097	fig|667120.3.peg.2361	fig|67780.5.peg.2721	fig|634503.5.peg.1184	fig|667121.3.peg.2085	fig|500638.4.peg.2232	fig|636.4.peg.3219
ETAE_1148	mdoG	Periplasmic	glucan biosynthesis protein G	fig|718251.4.peg.1098	fig|667120.3.peg.2362	fig|67780.5.peg.2722	fig|634503.5.peg.1185	fig|667121.3.peg.2086	fig|500638.4.peg.2233	fig|636.4.peg.3218
ETAE_1149	mdoH	CytoplasmicMembrane	glucosyltransferase	fig|718251.4.peg.1099	fig|667120.3.peg.2363	fig|67780.5.peg.2723	fig|634503.5.peg.1186	fig|667121.3.peg.2087	fig|500638.4.peg.2234	fig|636.4.peg.3217
ETAE_1152	moeB	Cytoplasmic	molybdopterin biosynthesis protein	fig|718251.4.peg.1102	fig|667120.3.peg.2366	fig|67780.5.peg.2726	fig|634503.5.peg.1188	fig|667121.3.peg.2088	fig|500638.4.peg.2236	fig|636.4.peg.1230
ETAE_1153	moeA	Unknown	molybdenum cofactor synthesis domain	fig|718251.4.peg.1103	fig|667120.3.peg.2367	fig|67780.5.peg.2727	fig|634503.5.peg.1189	fig|667121.3.peg.2089	fig|500638.4.peg.2237	fig|636.4.peg.1231
ETAE_1155	folE	Cytoplasmic	GTP cyclohydrolase I	fig|718251.4.peg.1104	fig|667120.3.peg.2369	fig|67780.5.peg.2728	fig|634503.5.peg.1190	fig|667121.3.peg.2091	fig|500638.4.peg.2239	fig|636.4.peg.1233
ETAE_1160		CytoplasmicMembrane	hypothetical protein	fig|718251.4.peg.1108	fig|667120.3.peg.2373	fig|67780.5.peg.2731	fig|634503.5.peg.1193	fig|667121.3.peg.2094	fig|500638.4.peg.2242	fig|636.4.peg.1236
ETAE_1161	sfcA	Unknown	malate dehydrogenase (oxaloacetate-decarboxylating)	fig|718251.4.peg.1109	fig|667120.3.peg.2374	fig|67780.5.peg.2732	fig|634503.5.peg.1194	fig|667121.3.peg.2095	fig|500638.4.peg.2243	fig|636.4.peg.1237
ETAE_1162	cdd	Unknown	cytidine deaminase	fig|718251.4.peg.1110	fig|667120.3.peg.2375	fig|67780.5.peg.2733	fig|634503.5.peg.1195	fig|667121.3.peg.748	fig|500638.4.peg.2244	fig|636.4.peg.2736
ETAE_1163	yohK	CytoplasmicMembrane	predicted inner membrane protein	fig|718251.4.peg.1111	fig|667120.3.peg.2376	fig|67780.5.peg.2734	fig|634503.5.peg.1196	fig|667121.3.peg.747	fig|500638.4.peg.2245	fig|636.4.peg.2735
ETAE_1164	cidA	CytoplasmicMembrane	holin-like protein	fig|718251.4.peg.1112	fig|667120.3.peg.2377	fig|67780.5.peg.2735	fig|634503.5.peg.1197	fig|667121.3.peg.746	fig|500638.4.peg.2246	fig|636.4.peg.2734
ETAE_1165	rarD	CytoplasmicMembrane	putative integral membrane protein	fig|718251.4.peg.1113	fig|667120.3.peg.2378	fig|67780.5.peg.2736	fig|634503.5.peg.1198	fig|667121.3.peg.745	fig|500638.4.peg.2247	fig|636.4.peg.2733
ETAE_1166	sbcB	Cytoplasmic	exonuclease I	fig|718251.4.peg.1114	fig|667120.3.peg.2379	fig|67780.5.peg.2737	fig|634503.5.peg.1199	fig|667121.3.peg.744	fig|500638.4.peg.2248	fig|636.4.peg.2732
ETAE_1190	dcd	Unknown	deoxycytidine triphosphate deaminase	fig|718251.4.peg.1136	fig|667120.3.peg.2394	fig|67780.5.peg.2749	fig|634503.5.peg.1211	fig|667121.3.peg.1328	fig|500638.4.peg.2262	fig|636.4.peg.2716
ETAE_1191		Unknown	AsmA family protein	fig|718251.4.peg.1137	fig|667120.3.peg.2395	fig|67780.5.peg.2750	fig|634503.5.peg.1212	fig|667121.3.peg.1329	fig|500638.4.peg.2263	fig|636.4.peg.2715
ETAE_1192	dcuC	CytoplasmicMembrane	C4-dicarboxylate transporter	fig|718251.4.peg.1138	fig|667120.3.peg.2396	fig|67780.5.peg.2751	fig|634503.5.peg.1213	fig|667121.3.peg.1330	fig|500638.4.peg.2264	fig|636.4.peg.2714
ETAE_1217		Unknown	hypothetical protein	fig|718251.4.peg.1159	fig|667120.3.peg.2888	fig|67780.5.peg.2512	fig|634503.5.peg.1244	fig|667121.3.peg.1274	fig|500638.4.peg.2315	fig|636.4.peg.2681
ETAE_1218		CytoplasmicMembrane	putative sulfatase	fig|718251.4.peg.1160	fig|667120.3.peg.2889	fig|67780.5.peg.2511	fig|634503.5.peg.1245	fig|667121.3.peg.1273	fig|500638.4.peg.2316	fig|636.4.peg.2680
ETAE_1219	flhB	CytoplasmicMembrane	flagellar biosynthetic protein	fig|718251.4.peg.1161	fig|667120.3.peg.2890	fig|67780.5.peg.2510	fig|634503.5.peg.1246	fig|667121.3.peg.3020	fig|500638.4.peg.2317	fig|636.4.peg.2679
ETAE_1220	flhA	CytoplasmicMembrane	flagellar biosynthesis protein	fig|718251.4.peg.1162	fig|667120.3.peg.2891	fig|67780.5.peg.2509	fig|634503.5.peg.1247	fig|667121.3.peg.3021	fig|500638.4.peg.2318	fig|636.4.peg.2678
ETAE_1222	flgN	Unknown	flagella synthesis protein	fig|718251.4.peg.1164	fig|667120.3.peg.2893	fig|67780.5.peg.2507	fig|634503.5.peg.1249	fig|667121.3.peg.3023	fig|500638.4.peg.2320	fig|636.4.peg.2675
ETAE_1223	flgM	Unknown	anti-sigma28 factor	fig|718251.4.peg.1165	fig|667120.3.peg.2894	fig|67780.5.peg.2506	fig|634503.5.peg.1250	fig|667121.3.peg.3024	fig|500638.4.peg.2321	fig|636.4.peg.2674
ETAE_1224	flgA	Unknown	flagellar basal body P-ring biosynthesis protein	fig|718251.4.peg.1166	fig|667120.3.peg.2895	fig|67780.5.peg.2505	fig|634503.5.peg.1251	fig|667121.3.peg.3026	fig|500638.4.peg.2322	fig|636.4.peg.2672
ETAE_1225	flgB	Unknown	flagellar basal-body rod protein	fig|718251.4.peg.1168	fig|667120.3.peg.2896	fig|67780.5.peg.2504	fig|634503.5.peg.1252	fig|667121.3.peg.3027	fig|500638.4.peg.2323	fig|636.4.peg.2671
ETAE_1226	flgC	Unknown	flagellar basal body rod protein	fig|718251.4.peg.1169	fig|667120.3.peg.2897	fig|67780.5.peg.2503	fig|634503.5.peg.1253	fig|667121.3.peg.3028	fig|500638.4.peg.2324	fig|636.4.peg.2670
ETAE_1238	aspC	Cytoplasmic	aspartate aminotransferase, PLP-dependent	fig|718251.4.peg.1179	fig|667120.3.peg.2909	fig|67780.5.peg.2493	fig|634503.5.peg.1263	fig|667121.3.peg.1271	fig|500638.4.peg.2336	fig|636.4.peg.2658
ETAE_1240	asnS	Cytoplasmic	asparaginyl-tRNA synthetase	fig|718251.4.peg.1182	fig|667120.3.peg.2911	fig|67780.5.peg.2491	fig|634503.5.peg.1265	fig|667121.3.peg.1799	fig|500638.4.peg.2338	fig|636.4.peg.2656
ETAE_1241	pncB	Cytoplasmic	nicotinate phosphoribosyltransferase	fig|718251.4.peg.1183	fig|667120.3.peg.2912	fig|67780.5.peg.2490	fig|634503.5.peg.1266	fig|667121.3.peg.1800	fig|500638.4.peg.2339	fig|636.4.peg.2655
ETAE_1242	pepN	Cytoplasmic	aminopeptidase N	fig|718251.4.peg.1184	fig|667120.3.peg.2913	fig|67780.5.peg.2489	fig|634503.5.peg.1267	fig|667121.3.peg.1801	fig|500638.4.peg.2340	fig|636.4.peg.2654
ETAE_1244		Cytoplasmic	glyoxalase/bleomycin resistance	fig|718251.4.peg.1186	fig|667120.3.peg.2915	fig|67780.5.peg.2487	fig|634503.5.peg.1269	fig|667121.3.peg.1802	fig|500638.4.peg.2341	fig|636.4.peg.2653
ETAE_1248	pyrD	Unknown	dihydroorotate dehydrogenase 2	fig|718251.4.peg.1194	fig|667120.3.peg.2927	fig|67780.5.peg.2475	fig|634503.5.peg.1281	fig|667121.3.peg.1803	fig|500638.4.peg.2342	fig|636.4.peg.2652
ETAE_1249		Unknown	hypothetical protein	fig|718251.4.peg.1195	fig|667120.3.peg.2928	fig|67780.5.peg.2474	fig|634503.5.peg.1282	fig|667121.3.peg.1804	fig|500638.4.peg.2343	fig|636.4.peg.2651
ETAE_1251		Unknown	hypothetical protein	fig|718251.4.peg.1197	fig|667120.3.peg.2930	fig|67780.5.peg.2472	fig|634503.5.peg.1284	fig|667121.3.peg.1806	fig|500638.4.peg.2345	fig|636.4.peg.2649
ETAE_1264	fabA	Cytoplasmic	beta-hydroxyacyl-(acyl-carrier-protein) dehydratase	fig|718251.4.peg.1210	fig|667120.3.peg.2943	fig|67780.5.peg.2462	fig|634503.5.peg.1294	fig|667121.3.peg.1815	fig|500638.4.peg.2353	fig|636.4.peg.2052
ETAE_1265		Unknown	putative Lon protease	fig|718251.4.peg.1211	fig|667120.3.peg.2944	fig|67780.5.peg.2461	fig|634503.5.peg.1295	fig|667121.3.peg.1816	fig|500638.4.peg.2354	fig|636.4.peg.2053
ETAE_1267	ompA	OuterMembrane	outer membrane protein A	fig|718251.4.peg.1213	fig|667120.3.peg.2947	fig|67780.5.peg.2458	fig|634503.5.peg.1298	fig|667121.3.peg.1819	fig|500638.4.peg.2356	fig|636.4.peg.2055
ETAE_1270		Cytoplasmic	hypothetical protein	fig|718251.4.peg.1215	fig|667120.3.peg.2951	fig|67780.5.peg.2456	fig|634503.5.peg.1300	fig|667121.3.peg.1822	fig|500638.4.peg.2358	fig|636.4.peg.2057
ETAE_1271		CytoplasmicMembrane	predicted membrane protein	fig|718251.4.peg.1216	fig|667120.3.peg.2952	fig|67780.5.peg.2455	fig|634503.5.peg.1301	fig|667121.3.peg.1823	fig|500638.4.peg.2359	fig|636.4.peg.2058
ETAE_1272		CytoplasmicMembrane	predicted membrane protein	fig|718251.4.peg.1217	fig|667120.3.peg.2953	fig|67780.5.peg.2454	fig|634503.5.peg.1302	fig|667121.3.peg.1824	fig|500638.4.peg.2361	fig|636.4.peg.2059
ETAE_1274	helD	Cytoplasmic	DNA helicase IV	fig|718251.4.peg.1219	fig|667120.3.peg.2954	fig|67780.5.peg.2453	fig|634503.5.peg.1303	fig|667121.3.peg.1825	fig|500638.4.peg.2362	fig|636.4.peg.2060
ETAE_1275	mgsA	Unknown	methylglyoxal synthase	fig|718251.4.peg.1220	fig|667120.3.peg.2955	fig|67780.5.peg.2452	fig|634503.5.peg.1304	fig|667121.3.peg.1826	fig|500638.4.peg.2363	fig|636.4.peg.2061
ETAE_1276		Unknown	hypothetical protein	fig|718251.4.peg.1221	fig|667120.3.peg.2956	fig|67780.5.peg.2451	fig|634503.5.peg.1305	fig|667121.3.peg.1827	fig|500638.4.peg.2364	fig|636.4.peg.2062
ETAE_1277		Unknown	CoA-binding domain protein	fig|718251.4.peg.1222	fig|667120.3.peg.2957	fig|67780.5.peg.2450	fig|634503.5.peg.1306	fig|667121.3.peg.1828	fig|500638.4.peg.2365	fig|636.4.peg.2063
ETAE_1278		Cytoplasmic	hemimethylated DNA binding protein	fig|718251.4.peg.1223	fig|667120.3.peg.2958	fig|67780.5.peg.2449	fig|634503.5.peg.1307	fig|667121.3.peg.1829	fig|500638.4.peg.2366	fig|636.4.peg.2064
ETAE_1279	yccW	Cytoplasmic	putative SAM-dependent methyltransferase	fig|718251.4.peg.1224	fig|667120.3.peg.2959	fig|67780.5.peg.2448	fig|634503.5.peg.1308	fig|667121.3.peg.1830	fig|500638.4.peg.2367	fig|636.4.peg.2065
ETAE_1281		Cytoplasmic	sulfite reductase	fig|718251.4.peg.1226	fig|667120.3.peg.2961	fig|67780.5.peg.2446	fig|634503.5.peg.1310	fig|667121.3.peg.1832	fig|500638.4.peg.2369	fig|636.4.peg.2067
ETAE_1288	yahN	CytoplasmicMembrane	putative transport protein	fig|718251.4.peg.1232	fig|667120.3.peg.2971	fig|67780.5.peg.2444	fig|634503.5.peg.1312	fig|667121.3.peg.2254	fig|500638.4.peg.2371	fig|636.4.peg.2069
ETAE_1289		CytoplasmicMembrane	hypothetical protein	fig|718251.4.peg.1233	fig|667120.3.peg.2987	fig|67780.5.peg.2440	fig|634503.5.peg.1315	fig|667121.3.peg.2253	fig|500638.4.peg.2372	fig|636.4.peg.2070
ETAE_1291	arnB	Cytoplasmic	UDP-4-amino-4-deoxy-L-arabinose--oxoglutarate aminotransferase	fig|718251.4.peg.1235	fig|667120.3.peg.2990	fig|67780.5.peg.2437	fig|634503.5.peg.1318	fig|667121.3.peg.1342	fig|500638.4.peg.2373	fig|636.4.peg.2071
ETAE_1292	arnC	Unknown	undecaprenyl phosphate 4-deoxy-4-formamido-L-arabinose transferase	fig|718251.4.peg.1236	fig|667120.3.peg.2991	fig|67780.5.peg.2436	fig|634503.5.peg.1319	fig|667121.3.peg.1341	fig|500638.4.peg.2374	fig|636.4.peg.2072
ETAE_1293	arnA	Unknown	UDP-glucuronic acid decarboxylase/UDP-4-amino-4-deoxy-L-arabinose formyltransferase	fig|718251.4.peg.1237	fig|667120.3.peg.2992	fig|67780.5.peg.2435	fig|634503.5.peg.1320	fig|667121.3.peg.1340	fig|500638.4.peg.2375	fig|636.4.peg.2073
ETAE_1294		Cytoplasmic	polysaccharide deacetylase	fig|718251.4.peg.1238	fig|667120.3.peg.2993	fig|67780.5.peg.2434	fig|634503.5.peg.1321	fig|667121.3.peg.1339	fig|500638.4.peg.2376	fig|636.4.peg.2074
ETAE_1295	arnT	CytoplasmicMembrane	4-amino-4-deoxy-L-arabinose transferase	fig|718251.4.peg.1239	fig|667120.3.peg.2994	fig|67780.5.peg.2433	fig|634503.5.peg.1322	fig|667121.3.peg.1338	fig|500638.4.peg.2377	fig|636.4.peg.2075
ETAE_1297		CytoplasmicMembrane	hypothetical protein	fig|718251.4.peg.1241	fig|667120.3.peg.2996	fig|67780.5.peg.2431	fig|634503.5.peg.1324	fig|667121.3.peg.1336	fig|500638.4.peg.2379	fig|636.4.peg.2077
ETAE_1298		Unknown	hypothetical protein	fig|718251.4.peg.1242	fig|667120.3.peg.2997	fig|67780.5.peg.2430	fig|634503.5.peg.1325	fig|667121.3.peg.1335	fig|500638.4.peg.2380	fig|636.4.peg.2078
ETAE_1314		CytoplasmicMembrane	hypothetical protein	fig|718251.4.peg.1255	fig|667120.3.peg.3011	fig|67780.5.peg.2376	fig|634503.5.peg.1342	fig|667121.3.peg.1791	fig|500638.4.peg.2395	fig|636.4.peg.140
ETAE_1316	appA	Periplasmic	4-phytase / acid phosphatase	fig|718251.4.peg.1256	fig|667120.3.peg.3013	fig|67780.5.peg.2377	fig|634503.5.peg.1343	fig|667121.3.peg.1790	fig|500638.4.peg.2396	fig|636.4.peg.139
ETAE_1322		Unknown	hypothetical protein	fig|718251.4.peg.1262	fig|667120.3.peg.3021	fig|67780.5.peg.2379	fig|634503.5.peg.1345	fig|667121.3.peg.1782	fig|500638.4.peg.2401	fig|636.4.peg.602
ETAE_1323		CytoplasmicMembrane	putative enzyme	fig|718251.4.peg.1263	fig|667120.3.peg.3022	fig|67780.5.peg.2380	fig|634503.5.peg.1346	fig|667121.3.peg.1781	fig|500638.4.peg.2402	fig|636.4.peg.603
ETAE_1324		CytoplasmicMembrane	peptidoglycan glycosyltransferase	fig|718251.4.peg.1264	fig|667120.3.peg.3023	fig|67780.5.peg.2381	fig|634503.5.peg.1347	fig|667121.3.peg.1779	fig|500638.4.peg.2404	fig|636.4.peg.605
ETAE_1336	flhD	Cytoplasmic	ranscriptional activator	fig|718251.4.peg.1277	fig|667120.3.peg.3029	fig|67780.5.peg.2386	fig|634503.5.peg.1352	fig|667121.3.peg.1774	fig|500638.4.peg.2409	fig|636.4.peg.610
ETAE_1337	flhC	Cytoplasmic	transcriptional activator	fig|718251.4.peg.1278	fig|667120.3.peg.3030	fig|67780.5.peg.2387	fig|634503.5.peg.1353	fig|667121.3.peg.1773	fig|500638.4.peg.2410	fig|636.4.peg.611
ETAE_1338	motA	CytoplasmicMembrane	flagellar motor protein	fig|718251.4.peg.1279	fig|667120.3.peg.3031	fig|67780.5.peg.2388	fig|634503.5.peg.1354	fig|667121.3.peg.1772	fig|500638.4.peg.2411	fig|636.4.peg.612
ETAE_1339	motB	CytoplasmicMembrane	flagellar motor protein	fig|718251.4.peg.1280	fig|667120.3.peg.3032	fig|67780.5.peg.2389	fig|634503.5.peg.1355	fig|667121.3.peg.1771	fig|500638.4.peg.2412	fig|636.4.peg.613
ETAE_1340	cheA	Cytoplasmic	chemotaxis protein histidine kinase and related kinases	fig|718251.4.peg.1281	fig|667120.3.peg.3033	fig|67780.5.peg.2390	fig|634503.5.peg.1357	fig|667121.3.peg.1770	fig|500638.4.peg.2413	fig|636.4.peg.614
ETAE_1341	cheW	Cytoplasmic	purine-binding chemotaxis protein	fig|718251.4.peg.1282	fig|667120.3.peg.3034	fig|67780.5.peg.2391	fig|634503.5.peg.1358	fig|667121.3.peg.1769	fig|500638.4.peg.2414	fig|636.4.peg.615
ETAE_1345	cheR	Cytoplasmic	chemotaxis regulator, protein-glutamate methyltransferase	fig|718251.4.peg.1285	fig|667120.3.peg.3038	fig|67780.5.peg.2394	fig|634503.5.peg.1362	fig|667121.3.peg.2691	fig|500638.4.peg.2417	fig|636.4.peg.619
ETAE_1347	cheY	Cytoplasmic	chemotaxis regulator transmitting signal to flagellar motor component	fig|718251.4.peg.1287	fig|667120.3.peg.3040	fig|67780.5.peg.2396	fig|634503.5.peg.1364	fig|667121.3.peg.2693	fig|500638.4.peg.2419	fig|636.4.peg.621
ETAE_1348	cheZ	Cytoplasmic	chemotaxis phosphatase	fig|718251.4.peg.1288	fig|667120.3.peg.3041	fig|67780.5.peg.2397	fig|634503.5.peg.1365	fig|667121.3.peg.2694	fig|500638.4.peg.2420	fig|636.4.peg.622
ETAE_1350	chaA	CytoplasmicMembrane	calcium/sodium:proton antiporter	fig|718251.4.peg.1290	fig|667120.3.peg.3045	fig|67780.5.peg.2401	fig|634503.5.peg.1368	fig|667121.3.peg.2695	fig|500638.4.peg.2421	fig|636.4.peg.623
ETAE_1352		CytoplasmicMembrane	hypothetical protein	fig|718251.4.peg.1292	fig|667120.3.peg.3047	fig|67780.5.peg.2403	fig|634503.5.peg.1370	fig|667121.3.peg.2696	fig|500638.4.peg.2422	fig|636.4.peg.624
ETAE_1353	yceK	Unknown	predicted lipoprotein	fig|718251.4.peg.1293	fig|667120.3.peg.3048	fig|67780.5.peg.2404	fig|634503.5.peg.1371	fig|667121.3.peg.2697	fig|500638.4.peg.2423	fig|636.4.peg.625
ETAE_1355		CytoplasmicMembrane	anaerobic c4-dicarboxylate antiporter, DcuC family	fig|718251.4.peg.1295	fig|667120.3.peg.3050	fig|67780.5.peg.2406	fig|634503.5.peg.1373	fig|667121.3.peg.2699	fig|500638.4.peg.2425	fig|636.4.peg.627
ETAE_1356		Cytoplasmic	DNA-binding transcriptional activator	fig|718251.4.peg.1296	fig|667120.3.peg.3051	fig|67780.5.peg.2407	fig|634503.5.peg.1374	fig|667121.3.peg.2700	fig|500638.4.peg.2426	fig|636.4.peg.628
ETAE_1361		CytoplasmicMembrane	anaerobic C4-dicarboxylate transporter	fig|718251.4.peg.1301	fig|667120.3.peg.3056	fig|67780.5.peg.2408	fig|634503.5.peg.1375	fig|667121.3.peg.2704	fig|500638.4.peg.2431	fig|636.4.peg.632
ETAE_1362		Cytoplasmic	isoaspartyl dipeptidase	fig|718251.4.peg.1302	fig|667120.3.peg.3057	fig|67780.5.peg.2409	fig|634503.5.peg.1376	fig|667121.3.peg.2705	fig|500638.4.peg.2432	fig|636.4.peg.633
ETAE_1363	lysR	Cytoplasmic	transcriptional regulator	fig|718251.4.peg.1303	fig|667120.3.peg.3058	fig|67780.5.peg.2410	fig|634503.5.peg.1378	fig|667121.3.peg.2707	fig|500638.4.peg.2433	fig|636.4.peg.635
ETAE_1369		Cytoplasmic	hypothetical protein	fig|718251.4.peg.1308	fig|667120.3.peg.3062	fig|67780.5.peg.2040	fig|634503.5.peg.1393	fig|667121.3.peg.2708	fig|500638.4.peg.2434	fig|636.4.peg.636
ETAE_1398		Cytoplasmic	translation-associated GTPase	fig|718251.4.peg.1332	fig|667120.3.peg.364	fig|67780.5.peg.2154	fig|634503.5.peg.1456	fig|667121.3.peg.2628	fig|500638.4.peg.2444	fig|636.4.peg.640
ETAE_1399	pth	CytoplasmicMembrane	peptidyl-tRNA hydrolase	fig|718251.4.peg.1333	fig|667120.3.peg.365	fig|67780.5.peg.2153	fig|634503.5.peg.1457	fig|667121.3.peg.2627	fig|500638.4.peg.2445	fig|636.4.peg.641
ETAE_1400		Unknown	hypothetical protein	fig|718251.4.peg.1334	fig|667120.3.peg.366	fig|67780.5.peg.2152	fig|634503.5.peg.1458	fig|667121.3.peg.2626	fig|500638.4.peg.2446	fig|636.4.peg.642
ETAE_1401		Unknown	hypothetical protein	fig|718251.4.peg.1335	fig|667120.3.peg.367	fig|67780.5.peg.2151	fig|634503.5.peg.1459	fig|667121.3.peg.2625	fig|500638.4.peg.2447	fig|636.4.peg.643
ETAE_1402	prsA	Cytoplasmic	ribose-phosphate pyrophosphokinase	fig|718251.4.peg.1336	fig|667120.3.peg.368	fig|67780.5.peg.2150	fig|634503.5.peg.1460	fig|667121.3.peg.2624	fig|500638.4.peg.2448	fig|636.4.peg.644
ETAE_1403	ispE	Unknown	4-diphosphocytidyl-2-C-methyl-D-erythritol kinase	fig|718251.4.peg.1337	fig|667120.3.peg.369	fig|67780.5.peg.2149	fig|634503.5.peg.1461	fig|667121.3.peg.2623	fig|500638.4.peg.2449	fig|636.4.peg.645
ETAE_1404	hemM	Unknown	outer membrane lipoprotein	fig|718251.4.peg.1338	fig|667120.3.peg.370	fig|67780.5.peg.2148	fig|634503.5.peg.1462	fig|667121.3.peg.2622	fig|500638.4.peg.2450	fig|636.4.peg.646
ETAE_1405	hemA	Cytoplasmic	glutamyl-tRNA reductase	fig|718251.4.peg.1339	fig|667120.3.peg.371	fig|67780.5.peg.2147	fig|634503.5.peg.1463	fig|667121.3.peg.2620	fig|500638.4.peg.2452	fig|636.4.peg.648
ETAE_1406	prfA	Cytoplasmic	peptide chain release factor 1	fig|718251.4.peg.1340	fig|667120.3.peg.372	fig|67780.5.peg.2146	fig|634503.5.peg.1464	fig|667121.3.peg.2619	fig|500638.4.peg.2453	fig|636.4.peg.649
ETAE_1408		Cytoplasmic	putative transcriptional regulator	fig|718251.4.peg.1342	fig|667120.3.peg.374	fig|67780.5.peg.2144	fig|634503.5.peg.1466	fig|667121.3.peg.1162	fig|500638.4.peg.2455	fig|636.4.peg.651
ETAE_1409	kdsA	Cytoplasmic	2-dehydro-3-deoxyphosphooctonate aldolase	fig|718251.4.peg.1343	fig|667120.3.peg.375	fig|67780.5.peg.2143	fig|634503.5.peg.1467	fig|667121.3.peg.1163	fig|500638.4.peg.2456	fig|636.4.peg.652
ETAE_1411	ychM	CytoplasmicMembrane	sulfate transporter	fig|718251.4.peg.1345	fig|667120.3.peg.377	fig|67780.5.peg.2141	fig|634503.5.peg.1468	fig|667121.3.peg.1165	fig|500638.4.peg.2458	fig|636.4.peg.2027
ETAE_1412		Unknown	hypothetical protein	fig|718251.4.peg.1346	fig|667120.3.peg.378	fig|67780.5.peg.2140	fig|634503.5.peg.1469	fig|667121.3.peg.1166	fig|500638.4.peg.2459	fig|636.4.peg.2026
ETAE_1414		Unknown	ABC-type uncharacterized transport system, periplasmic component	fig|718251.4.peg.1347	fig|667120.3.peg.388	fig|67780.5.peg.2139	fig|634503.5.peg.1470	fig|667121.3.peg.206	fig|500638.4.peg.2472	fig|636.4.peg.2024
ETAE_1415		CytoplasmicMembrane	amino acid/peptide transporter	fig|718251.4.peg.1348	fig|667120.3.peg.389	fig|67780.5.peg.2138	fig|634503.5.peg.1471	fig|667121.3.peg.207	fig|500638.4.peg.2473	fig|636.4.peg.2023
ETAE_1416		Cytoplasmic	D-isomer specific 2-hydroxyacid dehydrogenase NAD-binding	fig|718251.4.peg.1349	fig|667120.3.peg.390	fig|67780.5.peg.2137	fig|634503.5.peg.1472	fig|667121.3.peg.208	fig|500638.4.peg.2474	fig|636.4.peg.2022
ETAE_1417		Unknown	hypothetical protein	fig|718251.4.peg.1350	fig|667120.3.peg.391	fig|67780.5.peg.2136	fig|634503.5.peg.1473	fig|667121.3.peg.209	fig|500638.4.peg.2475	fig|636.4.peg.2021
ETAE_1420	torD	Unknown	cytoplasmic chaperone TorD family protein	fig|718251.4.peg.1353	fig|667120.3.peg.393	fig|67780.5.peg.2134	fig|634503.5.peg.1475	fig|667121.3.peg.211	fig|500638.4.peg.2477	fig|636.4.peg.2019
ETAE_1421		Unknown	predicted lipoprotein	fig|718251.4.peg.1354	fig|667120.3.peg.394	fig|67780.5.peg.2133	fig|634503.5.peg.1476	fig|667121.3.peg.212	fig|500638.4.peg.2478	fig|636.4.peg.2018
ETAE_1422	mdtH	CytoplasmicMembrane	multidrug resistance protein	fig|718251.4.peg.1355	fig|667120.3.peg.395	fig|67780.5.peg.2132	fig|634503.5.peg.1477	fig|667121.3.peg.213	fig|500638.4.peg.2479	fig|636.4.peg.2017
ETAE_1424		Cytoplasmic	hypothetical protein	fig|718251.4.peg.1357	fig|667120.3.peg.397	fig|67780.5.peg.2130	fig|634503.5.peg.1479	fig|667121.3.peg.215	fig|500638.4.peg.2482	fig|636.4.peg.2015
ETAE_1425	mviN	CytoplasmicMembrane	integral membrane protein	fig|718251.4.peg.1358	fig|667120.3.peg.398	fig|67780.5.peg.2129	fig|634503.5.peg.1480	fig|667121.3.peg.216	fig|500638.4.peg.2483	fig|636.4.peg.2014
ETAE_1426	argS	Cytoplasmic	arginyl-tRNA synthetase	fig|718251.4.peg.1359	fig|667120.3.peg.399	fig|67780.5.peg.2128	fig|634503.5.peg.1481	fig|667121.3.peg.217	fig|500638.4.peg.2484	fig|636.4.peg.2013
ETAE_1427		Cytoplasmic	hypothetical protein	fig|718251.4.peg.1360	fig|667120.3.peg.400	fig|67780.5.peg.2127	fig|634503.5.peg.1482	fig|667121.3.peg.219	fig|500638.4.peg.2486	fig|636.4.peg.2011
ETAE_1428		Cytoplasmic	aminotransferase class I and II	fig|718251.4.peg.1361	fig|667120.3.peg.401	fig|67780.5.peg.2126	fig|634503.5.peg.1483	fig|667121.3.peg.220	fig|500638.4.peg.2487	fig|636.4.peg.2010
ETAE_1429	cutC	Cytoplasmic	copper homeostasis protein	fig|718251.4.peg.1362	fig|667120.3.peg.402	fig|67780.5.peg.2125	fig|634503.5.peg.1484	fig|667121.3.peg.221	fig|500638.4.peg.2488	fig|636.4.peg.2009
ETAE_1430	yecP	Cytoplasmic	putative methyltransferase	fig|718251.4.peg.1363	fig|667120.3.peg.403	fig|67780.5.peg.2124	fig|634503.5.peg.1485	fig|667121.3.peg.222	fig|500638.4.peg.2489	fig|636.4.peg.2008
ETAE_1431	yecO	Cytoplasmic	putative methyltransferase	fig|718251.4.peg.1364	fig|667120.3.peg.404	fig|67780.5.peg.2123	fig|634503.5.peg.1486	fig|667121.3.peg.223	fig|500638.4.peg.2491	fig|636.4.peg.2007
ETAE_1433		CytoplasmicMembrane	hypothetical protein	fig|718251.4.peg.1366	fig|667120.3.peg.406	fig|67780.5.peg.2121	fig|634503.5.peg.1488	fig|667121.3.peg.1440	fig|500638.4.peg.2494	fig|636.4.peg.2005
ETAE_1434		Unknown	hypothetical protein	fig|718251.4.peg.1367	fig|667120.3.peg.407	fig|67780.5.peg.2120	fig|634503.5.peg.1489	fig|667121.3.peg.1441	fig|500638.4.peg.2495	fig|636.4.peg.2004
ETAE_1435	aspS	Cytoplasmic	aspartyl-tRNA synthetase	fig|718251.4.peg.1368	fig|667120.3.peg.408	fig|67780.5.peg.2118	fig|634503.5.peg.1491	fig|667121.3.peg.1443	fig|500638.4.peg.2497	fig|636.4.peg.2003
ETAE_1436	ntpA	Cytoplasmic	dATP pyrophosphohydrolase	fig|718251.4.peg.1369	fig|667120.3.peg.409	fig|67780.5.peg.2117	fig|634503.5.peg.1492	fig|667121.3.peg.1444	fig|500638.4.peg.2498	fig|636.4.peg.2002
ETAE_1437		Unknown	hypothetical protein	fig|718251.4.peg.1370	fig|667120.3.peg.410	fig|67780.5.peg.2116	fig|634503.5.peg.1493	fig|667121.3.peg.1445	fig|500638.4.peg.2499	fig|636.4.peg.2001
ETAE_1439	ruvA	Unknown	holliday junction resolvasome, DNA-binding subunit	fig|718251.4.peg.1372	fig|667120.3.peg.412	fig|67780.5.peg.2114	fig|634503.5.peg.1495	fig|667121.3.peg.1576	fig|500638.4.peg.2501	fig|636.4.peg.1999
ETAE_1440	ruvB	Cytoplasmic	holliday junction resolvasome, helicase subunit	fig|718251.4.peg.1373	fig|667120.3.peg.413	fig|67780.5.peg.2113	fig|634503.5.peg.1496	fig|667121.3.peg.1577	fig|500638.4.peg.2502	fig|636.4.peg.1998
ETAE_1441	znuB	CytoplasmicMembrane	high-affinity zinc transporter membrane component	fig|718251.4.peg.1374	fig|667120.3.peg.414	fig|67780.5.peg.2112	fig|634503.5.peg.1497	fig|667121.3.peg.1578	fig|500638.4.peg.2503	fig|636.4.peg.1997
ETAE_1442	znuC	Cytoplasmic	high-affinity zinc transporter ATPase	fig|718251.4.peg.1375	fig|667120.3.peg.415	fig|67780.5.peg.2111	fig|634503.5.peg.1498	fig|667121.3.peg.1579	fig|500638.4.peg.2504	fig|636.4.peg.1996
ETAE_1443	znuA	Periplasmic	high-affinity zinc transporter periplasmic component	fig|718251.4.peg.1376	fig|667120.3.peg.416	fig|67780.5.peg.2110	fig|634503.5.peg.1499	fig|667121.3.peg.1580	fig|500638.4.peg.2505	fig|636.4.peg.1995
ETAE_1444		Unknown	hypothetical protein	fig|718251.4.peg.1377	fig|667120.3.peg.417	fig|67780.5.peg.2109	fig|634503.5.peg.1500	fig|667121.3.peg.1581	fig|500638.4.peg.2506	fig|636.4.peg.1994
ETAE_1445	msbB	CytoplasmicMembrane	lipid A biosynthesis (KDO)2-(lauroyl)-lipid IVA acyltransferase	fig|718251.4.peg.1378	fig|667120.3.peg.418	fig|67780.5.peg.2108	fig|634503.5.peg.1501	fig|667121.3.peg.1582	fig|500638.4.peg.2507	fig|636.4.peg.1993
ETAE_1447		Cytoplasmic	pyruvate kinase	fig|718251.4.peg.1380	fig|667120.3.peg.420	fig|67780.5.peg.2106	fig|634503.5.peg.1502	fig|667121.3.peg.1584	fig|500638.4.peg.2509	fig|636.4.peg.1991
ETAE_1448	hexR	Cytoplasmic	DNA-binding transcriptional regulator	fig|718251.4.peg.1381	fig|667120.3.peg.421	fig|67780.5.peg.2105	fig|634503.5.peg.1503	fig|667121.3.peg.1585	fig|500638.4.peg.2510	fig|636.4.peg.1990
ETAE_1449	zwf	Cytoplasmic	glucose-6-phosphate 1-dehydrogenase	fig|718251.4.peg.1382	fig|667120.3.peg.422	fig|67780.5.peg.2104	fig|634503.5.peg.1504	fig|667121.3.peg.1586	fig|500638.4.peg.2511	fig|636.4.peg.1989
ETAE_1451	edd	Cytoplasmic	phosphogluconate dehydratase	fig|718251.4.peg.1384	fig|667120.3.peg.424	fig|67780.5.peg.2102	fig|634503.5.peg.1506	fig|667121.3.peg.1594	fig|500638.4.peg.2513	fig|636.4.peg.1987
ETAE_1452	eda	Cytoplasmic	keto-hydroxyglutarate-aldolase/keto-deoxy-phosphogluconate aldolase	fig|718251.4.peg.1385	fig|667120.3.peg.425	fig|67780.5.peg.2101	fig|634503.5.peg.1507	fig|667121.3.peg.1595	fig|500638.4.peg.2514	fig|636.4.peg.1986
ETAE_1453	mdtJ	CytoplasmicMembrane	small multidrug resistance protein	fig|718251.4.peg.1386	fig|667120.3.peg.427	fig|67780.5.peg.2100	fig|634503.5.peg.1508	fig|667121.3.peg.1597	fig|500638.4.peg.2516	fig|636.4.peg.1984
ETAE_1454	mdtI	CytoplasmicMembrane	multidrug efflux system protein	fig|718251.4.peg.1387	fig|667120.3.peg.428	fig|67780.5.peg.2099	fig|634503.5.peg.1509	fig|667121.3.peg.1598	fig|500638.4.peg.2517	fig|636.4.peg.1983
ETAE_1455		Unknown	hypothetical protein	fig|718251.4.peg.1388	fig|667120.3.peg.429	fig|67780.5.peg.2098	fig|634503.5.peg.1510	fig|667121.3.peg.1599	fig|500638.4.peg.2518	fig|636.4.peg.1982
ETAE_1456	yoaA	Unknown	putative ATP-dependent helicase	fig|718251.4.peg.1389	fig|667120.3.peg.430	fig|67780.5.peg.2097	fig|634503.5.peg.1511	fig|667121.3.peg.1600	fig|500638.4.peg.2519	fig|636.4.peg.1980
ETAE_1457		Unknown	hypothetical protein	fig|718251.4.peg.1390	fig|667120.3.peg.431	fig|67780.5.peg.2096	fig|634503.5.peg.1512	fig|667121.3.peg.1601	fig|500638.4.peg.2520	fig|636.4.peg.1979
ETAE_1458		Unknown	outer membrane lipoprotein, Slp family	fig|718251.4.peg.1391	fig|667120.3.peg.432	fig|67780.5.peg.2094	fig|634503.5.peg.1514	fig|667121.3.peg.1602	fig|500638.4.peg.2521	fig|636.4.peg.1978
ETAE_1460	rnd	Cytoplasmic	ribonuclease D	fig|718251.4.peg.1393	fig|667120.3.peg.435	fig|67780.5.peg.2092	fig|634503.5.peg.1516	fig|667121.3.peg.1604	fig|500638.4.peg.2522	fig|636.4.peg.1976
ETAE_1461	minE	Cytoplasmic	cell division topological specificity factor	fig|718251.4.peg.1394	fig|667120.3.peg.436	fig|67780.5.peg.2091	fig|634503.5.peg.1517	fig|667121.3.peg.1605	fig|500638.4.peg.2523	fig|636.4.peg.1975
ETAE_1462	minD	Cytoplasmic	septum site-determining protein	fig|718251.4.peg.1395	fig|667120.3.peg.437	fig|67780.5.peg.2090	fig|634503.5.peg.1518	fig|667121.3.peg.1606	fig|500638.4.peg.2524	fig|636.4.peg.1974
ETAE_1465		Unknown	2-keto-4-pentenoate hydratase/2-oxohepta-3-ene-1,7-dioic acid hydratase (catechol pathway)	fig|718251.4.peg.1398	fig|667120.3.peg.440	fig|67780.5.peg.2087	fig|634503.5.peg.1521	fig|667121.3.peg.1609	fig|500638.4.peg.2527	fig|636.4.peg.1971
ETAE_1466		Unknown	hypothetical protein	fig|718251.4.peg.1399	fig|667120.3.peg.441	fig|67780.5.peg.2086	fig|634503.5.peg.1522	fig|667121.3.peg.1610	fig|500638.4.peg.2528	fig|636.4.peg.1970
ETAE_1467		Cytoplasmic	putative filament protein	fig|718251.4.peg.1400	fig|667120.3.peg.442	fig|67780.5.peg.2085	fig|634503.5.peg.1523	fig|667121.3.peg.1611	fig|500638.4.peg.2529	fig|636.4.peg.1969
ETAE_1478		Cytoplasmic	hypothetical protein	fig|718251.4.peg.1410	fig|667120.3.peg.456	fig|67780.5.peg.2076	fig|634503.5.peg.1532	fig|667121.3.peg.2101	fig|500638.4.peg.2542	fig|636.4.peg.1958
ETAE_1480		OuterMembrane	MltA-interacting MipA family protein	fig|718251.4.peg.1412	fig|667120.3.peg.458	fig|67780.5.peg.2074	fig|634503.5.peg.1534	fig|667121.3.peg.2099	fig|500638.4.peg.2551	fig|636.4.peg.1956
ETAE_1482		Cytoplasmic	putative aldose 1-epimerase	fig|718251.4.peg.1414	fig|667120.3.peg.668	fig|67780.5.peg.2073	fig|634503.5.peg.1535	fig|667121.3.peg.2096	fig|500638.4.peg.2554	fig|636.4.peg.1954
ETAE_1483	gapA	Cytoplasmic	glyceraldehyde-3-phosphate dehydrogenase	fig|718251.4.peg.1415	fig|667120.3.peg.669	fig|67780.5.peg.2072	fig|634503.5.peg.1536	fig|667121.3.peg.1642	fig|500638.4.peg.2560	fig|636.4.peg.1946
ETAE_1484	msrB	Cytoplasmic	methionine-R-sulfoxide reductase	fig|718251.4.peg.1416	fig|667120.3.peg.670	fig|67780.5.peg.2071	fig|634503.5.peg.1537	fig|667121.3.peg.1643	fig|500638.4.peg.2561	fig|636.4.peg.1945
ETAE_1485		Unknown	hypothetical protein	fig|718251.4.peg.1417	fig|667120.3.peg.671	fig|67780.5.peg.2070	fig|634503.5.peg.1538	fig|667121.3.peg.1644	fig|500638.4.peg.2562	fig|636.4.peg.1944
ETAE_1486	pncA	Unknown	nicotinamidase/pyrazinamidase	fig|718251.4.peg.1418	fig|667120.3.peg.672	fig|67780.5.peg.2069	fig|634503.5.peg.1539	fig|667121.3.peg.1645	fig|500638.4.peg.2563	fig|636.4.peg.1943
ETAE_1487	ansA	Cytoplasmic	cytoplasmic asparaginase I	fig|718251.4.peg.1419	fig|667120.3.peg.673	fig|67780.5.peg.2068	fig|634503.5.peg.1540	fig|667121.3.peg.1646	fig|500638.4.peg.2564	fig|636.4.peg.1942
ETAE_1488	sppA	Unknown	periplasmic serine protease (ClpP class), protease IV	fig|718251.4.peg.1420	fig|667120.3.peg.674	fig|67780.5.peg.2067	fig|634503.5.peg.1541	fig|667121.3.peg.1647	fig|500638.4.peg.2565	fig|636.4.peg.1941
ETAE_1491	selD	Cytoplasmic	selenophosphate synthetase	fig|718251.4.peg.1423	fig|667120.3.peg.676	fig|67780.5.peg.2065	fig|634503.5.peg.1543	fig|667121.3.peg.1649	fig|500638.4.peg.2567	fig|636.4.peg.1939
ETAE_1492		Cytoplasmic	tRNA 2-selenouridine synthase	fig|718251.4.peg.1424	fig|667120.3.peg.677	fig|67780.5.peg.2064	fig|634503.5.peg.1544	fig|667121.3.peg.1650	fig|500638.4.peg.2568	fig|636.4.peg.1938
ETAE_1493	topB	Cytoplasmic	DNA topoisomerase III	fig|718251.4.peg.1425	fig|667120.3.peg.678	fig|67780.5.peg.2063	fig|634503.5.peg.1545	fig|667121.3.peg.1651	fig|500638.4.peg.2569	fig|636.4.peg.1937
ETAE_1494		Unknown	hypothetical protein	fig|718251.4.peg.1426	fig|667120.3.peg.679	fig|67780.5.peg.2062	fig|634503.5.peg.1546	fig|667121.3.peg.1652	fig|500638.4.peg.2570	fig|636.4.peg.1936
ETAE_1495	nudG	Cytoplasmic	pyrimidine (deoxy)nucleoside triphosphate	fig|718251.4.peg.1427	fig|667120.3.peg.680	fig|67780.5.peg.2061	fig|634503.5.peg.1547	fig|667121.3.peg.1653	fig|500638.4.peg.2571	fig|636.4.peg.1935
ETAE_1496	xthA	Cytoplasmic	exonuclease III	fig|718251.4.peg.1428	fig|667120.3.peg.681	fig|67780.5.peg.2060	fig|634503.5.peg.1548	fig|667121.3.peg.1654	fig|500638.4.peg.2572	fig|636.4.peg.1934
ETAE_1497		Cytoplasmic	hypothetical protein	fig|718251.4.peg.1429	fig|667120.3.peg.682	fig|67780.5.peg.2059	fig|634503.5.peg.1549	fig|667121.3.peg.1655	fig|500638.4.peg.2573	fig|636.4.peg.1933
ETAE_1499	purU	Periplasmic	formyltetrahydrofolate deformylase	fig|718251.4.peg.1430	fig|667120.3.peg.683	fig|67780.5.peg.2057	fig|634503.5.peg.1551	fig|667121.3.peg.316	fig|500638.4.peg.2574	fig|636.4.peg.1932
ETAE_1500		Unknown	hypothetical protein	fig|718251.4.peg.1431	fig|667120.3.peg.684	fig|67780.5.peg.2056	fig|634503.5.peg.1552	fig|667121.3.peg.315	fig|500638.4.peg.2575	fig|636.4.peg.1931
ETAE_1502		Cytoplasmic	response regulator receiver protein	fig|718251.4.peg.1432	fig|667120.3.peg.685	fig|67780.5.peg.2055	fig|634503.5.peg.1553	fig|667121.3.peg.314	fig|500638.4.peg.2576	fig|636.4.peg.1930
ETAE_1503	galU	Cytoplasmic	UTP--glucose-1-phosphate uridylyltransferase subunit	fig|718251.4.peg.1433	fig|667120.3.peg.686	fig|67780.5.peg.2054	fig|634503.5.peg.1554	fig|667121.3.peg.313	fig|500638.4.peg.2577	fig|636.4.peg.1929
ETAE_1506	tdk	Unknown	thymidine kinase	fig|718251.4.peg.1435	fig|667120.3.peg.689	fig|67780.5.peg.2052	fig|634503.5.peg.1556	fig|667121.3.peg.311	fig|500638.4.peg.2579	fig|636.4.peg.1927
ETAE_1508	adhE	Unknown	aldehyde-alcohol dehydrogenase	fig|718251.4.peg.1437	fig|667120.3.peg.690	fig|67780.5.peg.2051	fig|634503.5.peg.1557	fig|667121.3.peg.310	fig|500638.4.peg.2580	fig|636.4.peg.1926
ETAE_1511		CytoplasmicMembrane	multiple antibiotic transporter	fig|718251.4.peg.1439	fig|667120.3.peg.692	fig|67780.5.peg.2049	fig|634503.5.peg.1559	fig|667121.3.peg.309	fig|500638.4.peg.2581	fig|636.4.peg.1925
ETAE_1512	oppA	Periplasmic	periplasmic oligopeptide-binding protein precursor	fig|718251.4.peg.1440	fig|667120.3.peg.693	fig|67780.5.peg.2048	fig|634503.5.peg.1560	fig|667121.3.peg.308	fig|500638.4.peg.2582	fig|636.4.peg.1924
ETAE_1513	oppB	CytoplasmicMembrane	oligopeptide permease ABC transporter membrane	fig|718251.4.peg.1441	fig|667120.3.peg.694	fig|67780.5.peg.2047	fig|634503.5.peg.1561	fig|667121.3.peg.182	fig|500638.4.peg.2583	fig|636.4.peg.1923
ETAE_1514	oppC	CytoplasmicMembrane	oligopeptide transport protein	fig|718251.4.peg.1442	fig|667120.3.peg.695	fig|67780.5.peg.2046	fig|634503.5.peg.1562	fig|667121.3.peg.181	fig|500638.4.peg.2584	fig|636.4.peg.1922
ETAE_1515	oppD	Unknown	oligopeptide transporter ATP-binding component	fig|718251.4.peg.1443	fig|667120.3.peg.696	fig|67780.5.peg.2045	fig|634503.5.peg.1563	fig|667121.3.peg.180	fig|500638.4.peg.2585	fig|636.4.peg.1921
ETAE_1516	oppF	CytoplasmicMembrane	oligopeptide transport ATP-binding protein	fig|718251.4.peg.1444	fig|667120.3.peg.697	fig|67780.5.peg.2044	fig|634503.5.peg.1564	fig|667121.3.peg.179	fig|500638.4.peg.2586	fig|636.4.peg.1920
ETAE_1517		Cytoplasmic	dsDNA-mimic protein	fig|718251.4.peg.1445	fig|667120.3.peg.698	fig|67780.5.peg.303	fig|634503.5.peg.1565	fig|667121.3.peg.178	fig|500638.4.peg.2587	fig|636.4.peg.929
ETAE_1518	cls	CytoplasmicMembrane	cardiolipin synthetase	fig|718251.4.peg.1446	fig|667120.3.peg.699	fig|67780.5.peg.304	fig|634503.5.peg.1566	fig|667121.3.peg.177	fig|500638.4.peg.2588	fig|636.4.peg.928
ETAE_1520		Unknown	ferritin Dps family protein	fig|718251.4.peg.1448	fig|667120.3.peg.701	fig|67780.5.peg.307	fig|634503.5.peg.1569	fig|667121.3.peg.175	fig|500638.4.peg.2590	fig|636.4.peg.926
ETAE_1521		Unknown	YciL domain protein	fig|718251.4.peg.1449	fig|667120.3.peg.702	fig|67780.5.peg.309	fig|634503.5.peg.1571	fig|667121.3.peg.174	fig|500638.4.peg.2591	fig|636.4.peg.925
ETAE_1523	yciA	Cytoplasmic	acyl-CoA thioesterase YciA	fig|718251.4.peg.1451	fig|667120.3.peg.704	fig|67780.5.peg.311	fig|634503.5.peg.1574	fig|667121.3.peg.172	fig|500638.4.peg.2593	fig|636.4.peg.923
ETAE_1524	ispZ	CytoplasmicMembrane	intracellular septation protein	fig|718251.4.peg.1452	fig|667120.3.peg.705	fig|67780.5.peg.312	fig|634503.5.peg.1575	fig|667121.3.peg.171	fig|500638.4.peg.2594	fig|636.4.peg.922
ETAE_1525		CytoplasmicMembrane	sulfate permease family protein	fig|718251.4.peg.1453	fig|667120.3.peg.707	fig|67780.5.peg.313	fig|634503.5.peg.1576	fig|667121.3.peg.170	fig|500638.4.peg.2595	fig|636.4.peg.921
ETAE_1527		CytoplasmicMembrane	hypothetical protein	fig|718251.4.peg.1455	fig|667120.3.peg.709	fig|67780.5.peg.315	fig|634503.5.peg.1578	fig|667121.3.peg.168	fig|500638.4.peg.2597	fig|636.4.peg.919
ETAE_1528	ompW	OuterMembrane	outer membrane protein W	fig|718251.4.peg.1456	fig|667120.3.peg.710	fig|67780.5.peg.316	fig|634503.5.peg.1579	fig|667121.3.peg.166	fig|500638.4.peg.2599	fig|636.4.peg.917
ETAE_1529		Periplasmic	putative lipoprotein	fig|718251.4.peg.1457	fig|667120.3.peg.711	fig|67780.5.peg.317	fig|634503.5.peg.1580	fig|667121.3.peg.165	fig|500638.4.peg.2600	fig|636.4.peg.916
ETAE_1530	trpA	Cytoplasmic	tryptophan synthase subunit alpha	fig|718251.4.peg.1458	fig|667120.3.peg.712	fig|67780.5.peg.318	fig|634503.5.peg.1581	fig|667121.3.peg.164	fig|500638.4.peg.2601	fig|636.4.peg.915
ETAE_1532	trpC	Unknown	phosphoribosylanthranilate isomerase	fig|718251.4.peg.1460	fig|667120.3.peg.714	fig|67780.5.peg.320	fig|634503.5.peg.1583	fig|667121.3.peg.162	fig|500638.4.peg.2604	fig|636.4.peg.913
ETAE_1533	trpD	Unknown	bifunctional indole-3-glycerol-phosphate	fig|718251.4.peg.1461	fig|667120.3.peg.715	fig|67780.5.peg.321	fig|634503.5.peg.1584	fig|667121.3.peg.161	fig|500638.4.peg.2605	fig|636.4.peg.912
ETAE_1534	trpG	Cytoplasmic	anthranilate synthase component II	fig|718251.4.peg.1462	fig|667120.3.peg.716	fig|67780.5.peg.322	fig|634503.5.peg.1585	fig|667121.3.peg.160	fig|500638.4.peg.2606	fig|636.4.peg.911
ETAE_1535	trpE	Cytoplasmic	anthranilate synthase component I	fig|718251.4.peg.1463	fig|667120.3.peg.717	fig|67780.5.peg.323	fig|634503.5.peg.1586	fig|667121.3.peg.159	fig|500638.4.peg.2607	fig|636.4.peg.910
ETAE_1536		Unknown	hypothetical protein	fig|718251.4.peg.1464	fig|667120.3.peg.718	fig|67780.5.peg.324	fig|634503.5.peg.1587	fig|667121.3.peg.158	fig|500638.4.peg.2608	fig|636.4.peg.909
ETAE_1537		Cytoplasmic	hypothetical protein	fig|718251.4.peg.1465	fig|667120.3.peg.719	fig|67780.5.peg.325	fig|634503.5.peg.1588	fig|667121.3.peg.157	fig|500638.4.peg.2609	fig|636.4.peg.908
ETAE_1538		Cytoplasmic	hypothetical protein	fig|718251.4.peg.1466	fig|667120.3.peg.720	fig|67780.5.peg.326	fig|634503.5.peg.1589	fig|667121.3.peg.156	fig|500638.4.peg.2610	fig|636.4.peg.907
ETAE_1539		CytoplasmicMembrane	amino-acid ABC transporter permease component	fig|718251.4.peg.1467	fig|667120.3.peg.721	fig|67780.5.peg.327	fig|634503.5.peg.1590	fig|667121.3.peg.155	fig|500638.4.peg.2611	fig|636.4.peg.906
ETAE_1540	flig	Periplasmic	amino-acid ABC transporter periplasmic component	fig|718251.4.peg.1468	fig|667120.3.peg.722	fig|67780.5.peg.328	fig|634503.5.peg.1591	fig|667121.3.peg.154	fig|500638.4.peg.2612	fig|636.4.peg.905
ETAE_1542		Cytoplasmic	AraC-family transcriptional regulatory protein	fig|718251.4.peg.1470	fig|667120.3.peg.724	fig|67780.5.peg.330	fig|634503.5.peg.1592	fig|667121.3.peg.152	fig|500638.4.peg.2614	fig|636.4.peg.903
ETAE_1543	holE	Unknown	DNA polymerase III subunit theta	fig|718251.4.peg.1471	fig|667120.3.peg.725	fig|67780.5.peg.331	fig|634503.5.peg.1593	fig|667121.3.peg.151	fig|500638.4.peg.2615	fig|636.4.peg.902
ETAE_1544		Unknown	hypothetical protein	fig|718251.4.peg.1472	fig|667120.3.peg.726	fig|67780.5.peg.332	fig|634503.5.peg.1594	fig|667121.3.peg.150	fig|500638.4.peg.2616	fig|636.4.peg.901
ETAE_1545	rluB	Cytoplasmic	ribosomal large subunit pseudouridine synthase B	fig|718251.4.peg.1473	fig|667120.3.peg.728	fig|67780.5.peg.333	fig|634503.5.peg.1595	fig|667121.3.peg.149	fig|500638.4.peg.2617	fig|636.4.peg.900
ETAE_1546	cobS	CytoplasmicMembrane	cobalamin synthase	fig|718251.4.peg.1474	fig|667120.3.peg.729	fig|67780.5.peg.334	fig|634503.5.peg.1596	fig|667121.3.peg.148	fig|500638.4.peg.2618	fig|636.4.peg.899
ETAE_1548	btuR	Cytoplasmic	cob(I)yrinic acid a,c-diamide adenosyltransferase	fig|718251.4.peg.1476	fig|667120.3.peg.731	fig|67780.5.peg.336	fig|634503.5.peg.1598	fig|667121.3.peg.146	fig|500638.4.peg.2620	fig|636.4.peg.897
ETAE_1549		Cytoplasmic	short chain dehydrogenase	fig|718251.4.peg.1477	fig|667120.3.peg.732	fig|67780.5.peg.337	fig|634503.5.peg.1599	fig|667121.3.peg.145	fig|500638.4.peg.2621	fig|636.4.peg.896
ETAE_1551		Unknown	hypothetical protein	fig|718251.4.peg.1479	fig|667120.3.peg.734	fig|67780.5.peg.339	fig|634503.5.peg.1601	fig|667121.3.peg.143	fig|500638.4.peg.2654	fig|636.4.peg.894
ETAE_1552	topA	Unknown	DNA topoisomerase I	fig|718251.4.peg.1480	fig|667120.3.peg.735	fig|67780.5.peg.340	fig|634503.5.peg.1602	fig|667121.3.peg.142	fig|500638.4.peg.2655	fig|636.4.peg.893
ETAE_1553	cysB	Cytoplasmic	transcriptional regulator	fig|718251.4.peg.1481	fig|667120.3.peg.737	fig|67780.5.peg.3160	fig|634503.5.peg.1606	fig|667121.3.peg.141	fig|500638.4.peg.2656	fig|636.4.peg.892
ETAE_1554	cspC	Cytoplasmic	cold shock protein	fig|718251.4.peg.1483	fig|667120.3.peg.741	fig|67780.5.peg.3157	fig|634503.5.peg.1609	fig|667121.3.peg.138	fig|500638.4.peg.2659	fig|636.4.peg.889
ETAE_1556		CytoplasmicMembrane	hypothetical protein	fig|718251.4.peg.1485	fig|667120.3.peg.743	fig|67780.5.peg.3155	fig|634503.5.peg.1611	fig|667121.3.peg.1312	fig|500638.4.peg.2661	fig|636.4.peg.887
ETAE_1557	manZ	CytoplasmicMembrane	PTS system, mannose-specific IID component	fig|718251.4.peg.1486	fig|667120.3.peg.744	fig|67780.5.peg.3154	fig|634503.5.peg.1612	fig|667121.3.peg.1311	fig|500638.4.peg.2662	fig|636.4.peg.886
ETAE_1560	terC	CytoplasmicMembrane	integral membrane protein	fig|718251.4.peg.1489	fig|667120.3.peg.3206	fig|67780.5.peg.3151	fig|634503.5.peg.1615	fig|667121.3.peg.1307	fig|500638.4.peg.2667	fig|636.4.peg.882
ETAE_1563		Unknown	hypothetical protein	fig|718251.4.peg.1493	fig|667120.3.peg.3204	fig|67780.5.peg.3150	fig|634503.5.peg.1616	fig|667121.3.peg.2412	fig|500638.4.peg.2669	fig|636.4.peg.879
ETAE_1568		CytoplasmicMembrane	sodium:dicarboxylate symporter	fig|718251.4.peg.1498	fig|667120.3.peg.2830	fig|67780.5.peg.3145	fig|634503.5.peg.1621	fig|667121.3.peg.730	fig|500638.4.peg.2675	fig|636.4.peg.2815
ETAE_1569		CytoplasmicMembrane	hypothetical protein	fig|718251.4.peg.1499	fig|667120.3.peg.2831	fig|67780.5.peg.3144	fig|634503.5.peg.1622	fig|667121.3.peg.729	fig|500638.4.peg.2676	fig|636.4.peg.2816
ETAE_1570		Cytoplasmic	HAD-superfamily hydrolase, subfamily IA, variant 3	fig|718251.4.peg.1500	fig|667120.3.peg.2832	fig|67780.5.peg.3143	fig|634503.5.peg.1623	fig|667121.3.peg.728	fig|500638.4.peg.2677	fig|636.4.peg.2817
ETAE_1571	yfeE	CytoplasmicMembrane	putative yfeABCD locus regulator	fig|718251.4.peg.1501	fig|667120.3.peg.2833	fig|67780.5.peg.3142	fig|634503.5.peg.1624	fig|667121.3.peg.727	fig|500638.4.peg.2678	fig|636.4.peg.2818
ETAE_1572		Cytoplasmic	fructosamine kinase	fig|718251.4.peg.1502	fig|667120.3.peg.2834	fig|67780.5.peg.3141	fig|634503.5.peg.1625	fig|667121.3.peg.726	fig|500638.4.peg.2679	fig|636.4.peg.2819
ETAE_1574		Unknown	lytic transglycosylase catalytic	fig|718251.4.peg.1504	fig|667120.3.peg.2836	fig|67780.5.peg.3139	fig|634503.5.peg.1627	fig|667121.3.peg.724	fig|500638.4.peg.2681	fig|636.4.peg.2821
ETAE_1575		CytoplasmicMembrane	serine transporter	fig|718251.4.peg.1505	fig|667120.3.peg.2837	fig|67780.5.peg.3138	fig|634503.5.peg.1628	fig|667121.3.peg.723	fig|500638.4.peg.2682	fig|636.4.peg.2822
ETAE_1576		Cytoplasmic	putative ABC transport ATP-binding subunit	fig|718251.4.peg.1506	fig|667120.3.peg.2838	fig|67780.5.peg.3137	fig|634503.5.peg.1629	fig|667121.3.peg.721	fig|500638.4.peg.2683	fig|636.4.peg.2823
ETAE_1577		CytoplasmicMembrane	putative ABC-type transport system ATPase component	fig|718251.4.peg.1507	fig|667120.3.peg.2839	fig|67780.5.peg.3136	fig|634503.5.peg.1630	fig|667121.3.peg.720	fig|500638.4.peg.2684	fig|636.4.peg.2824
ETAE_1578		CytoplasmicMembrane	putative inner membrane transport protein	fig|718251.4.peg.1508	fig|667120.3.peg.2840	fig|67780.5.peg.3135	fig|634503.5.peg.1631	fig|667121.3.peg.719	fig|500638.4.peg.2685	fig|636.4.peg.2825
ETAE_1580		Periplasmic	putative substrate-binding transport protein	fig|718251.4.peg.1510	fig|667120.3.peg.2842	fig|67780.5.peg.3133	fig|634503.5.peg.1633	fig|667121.3.peg.1459	fig|500638.4.peg.2688	fig|636.4.peg.2827
ETAE_1581		CytoplasmicMembrane	hypothetical protein	fig|718251.4.peg.1511	fig|667120.3.peg.2843	fig|67780.5.peg.3131	fig|634503.5.peg.1634	fig|667121.3.peg.1458	fig|500638.4.peg.2689	fig|636.4.peg.2828
ETAE_1582		CytoplasmicMembrane	peptidoglycan glycosyltransferase	fig|718251.4.peg.1512	fig|667120.3.peg.2844	fig|67780.5.peg.3130	fig|634503.5.peg.1635	fig|667121.3.peg.1457	fig|500638.4.peg.2690	fig|636.4.peg.2829
ETAE_1584		Unknown	hypothetical protein	fig|718251.4.peg.1514	fig|667120.3.peg.2846	fig|67780.5.peg.3128	fig|634503.5.peg.1637	fig|667121.3.peg.1456	fig|500638.4.peg.2691	fig|636.4.peg.2830
ETAE_1585		Cytoplasmic	hypothetical protein	fig|718251.4.peg.1515	fig|667120.3.peg.2847	fig|67780.5.peg.3127	fig|634503.5.peg.1638	fig|667121.3.peg.1455	fig|500638.4.peg.2692	fig|636.4.peg.2831
ETAE_1652		Cytoplasmic	GAF domain-containing protein	fig|718251.4.peg.1535	fig|667120.3.peg.3198	fig|67780.5.peg.1390	fig|634503.5.peg.1680	fig|667121.3.peg.555	fig|500638.4.peg.903	fig|636.4.peg.166
ETAE_1653	proQ	Unknown	putative solute/DNA competence effector	fig|718251.4.peg.1536	fig|667120.3.peg.3199	fig|67780.5.peg.1391	fig|634503.5.peg.1681	fig|667121.3.peg.554	fig|500638.4.peg.902	fig|636.4.peg.167
ETAE_1655	prc	Unknown	carboxy-terminal protease	fig|718251.4.peg.1538	fig|667120.3.peg.3200	fig|67780.5.peg.1392	fig|634503.5.peg.1682	fig|667121.3.peg.553	fig|500638.4.peg.901	fig|636.4.peg.168
ETAE_1668	silA	CytoplasmicMembrane	putative cation efflux system protein (silver resistance)	fig|718251.4.peg.1550	fig|667120.3.peg.3235	fig|67780.5.peg.239	fig|634503.5.peg.1977	fig|667121.3.peg.541	fig|500638.4.peg.889	fig|636.4.peg.179
ETAE_1670		CytoplasmicMembrane	drug resistance transporter, Bcr/CflA subfamily	fig|718251.4.peg.1552	fig|667120.3.peg.3233	fig|67780.5.peg.241	fig|634503.5.peg.1975	fig|667121.3.peg.3207	fig|500638.4.peg.887	fig|636.4.peg.181
ETAE_1671		Cytoplasmic	transcriptional regulator, LysR family	fig|718251.4.peg.1553	fig|667120.3.peg.3232	fig|67780.5.peg.242	fig|634503.5.peg.1974	fig|667121.3.peg.3206	fig|500638.4.peg.886	fig|636.4.peg.182
ETAE_1674	purR	Cytoplasmic	DNA-binding transcriptional repressor	fig|718251.4.peg.1556	fig|667120.3.peg.3229	fig|67780.5.peg.245	fig|634503.5.peg.1971	fig|667121.3.peg.3203	fig|500638.4.peg.883	fig|636.4.peg.185
ETAE_1677		Unknown	cell wall-associated hydrolases (invasion-associated proteins)	fig|718251.4.peg.1559	fig|667120.3.peg.3227	fig|67780.5.peg.247	fig|634503.5.peg.1969	fig|667121.3.peg.1638	fig|500638.4.peg.880	fig|636.4.peg.188
ETAE_1679		Unknown	hypothetical protein	fig|718251.4.peg.1561	fig|667120.3.peg.3225	fig|67780.5.peg.249	fig|634503.5.peg.1967	fig|667121.3.peg.1637	fig|500638.4.peg.879	fig|636.4.peg.189
ETAE_1681	rnt	Unknown	ribonuclease T	fig|718251.4.peg.1563	fig|667120.3.peg.3223	fig|67780.5.peg.251	fig|634503.5.peg.1965	fig|667121.3.peg.1635	fig|500638.4.peg.878	fig|636.4.peg.191
ETAE_1682	gloA	Unknown	lactoylglutathione lyase	fig|718251.4.peg.1564	fig|667120.3.peg.3222	fig|67780.5.peg.252	fig|634503.5.peg.1964	fig|667121.3.peg.1634	fig|500638.4.peg.877	fig|636.4.peg.192
ETAE_1684	slyA	Cytoplasmic	transcriptional regulators	fig|718251.4.peg.1565	fig|667120.3.peg.3221	fig|67780.5.peg.253	fig|634503.5.peg.1963	fig|667121.3.peg.1633	fig|500638.4.peg.876	fig|636.4.peg.193
ETAE_1686	anmK	Unknown	anhydro-N-acetylmuramic acid kinase	fig|718251.4.peg.1567	fig|667120.3.peg.3219	fig|67780.5.peg.255	fig|634503.5.peg.1961	fig|667121.3.peg.1513	fig|500638.4.peg.874	fig|636.4.peg.195
ETAE_1687		Unknown	predicted periplasmic protein	fig|718251.4.peg.1568	fig|667120.3.peg.3218	fig|67780.5.peg.256	fig|634503.5.peg.1960	fig|667121.3.peg.1514	fig|500638.4.peg.873	fig|636.4.peg.196
ETAE_1689	pdxH	Unknown	pyridoxamine 5'-phosphate oxidase	fig|718251.4.peg.1569	fig|667120.3.peg.3217	fig|67780.5.peg.257	fig|634503.5.peg.1959	fig|667121.3.peg.1515	fig|500638.4.peg.872	fig|636.4.peg.197
ETAE_1690	tyrS	Cytoplasmic	tyrosyl-tRNA synthetase	fig|718251.4.peg.1570	fig|667120.3.peg.3216	fig|67780.5.peg.258	fig|634503.5.peg.1958	fig|667121.3.peg.1516	fig|500638.4.peg.871	fig|636.4.peg.198
ETAE_1691	pdxK	Cytoplasmic	pyridoxal/pyridoxine/pyridoxamine kinase	fig|718251.4.peg.1571	fig|667120.3.peg.3215	fig|67780.5.peg.259	fig|634503.5.peg.1957	fig|667121.3.peg.1517	fig|500638.4.peg.869	fig|636.4.peg.199
ETAE_1692	tppB	CytoplasmicMembrane	dipeptide/tripeptide permease	fig|718251.4.peg.1573	fig|667120.3.peg.3213	fig|67780.5.peg.261	fig|634503.5.peg.1955	fig|667121.3.peg.1519	fig|500638.4.peg.867	fig|636.4.peg.201
ETAE_1694	nth	Cytoplasmic	endonuclease III; DNA glycosylase/apyrimidinic (AP) lyase	fig|718251.4.peg.1574	fig|667120.3.peg.3212	fig|67780.5.peg.262	fig|634503.5.peg.1954	fig|667121.3.peg.1520	fig|500638.4.peg.866	fig|636.4.peg.202
ETAE_1696	rnfG	Unknown	electron transport complex protein	fig|718251.4.peg.1576	fig|667120.3.peg.3210	fig|67780.5.peg.264	fig|634503.5.peg.1952	fig|667121.3.peg.1522	fig|500638.4.peg.864	fig|636.4.peg.204
ETAE_1697	rnfD	CytoplasmicMembrane	electron transport complex protein	fig|718251.4.peg.1577	fig|667120.3.peg.3209	fig|67780.5.peg.265	fig|634503.5.peg.1951	fig|667121.3.peg.1523	fig|500638.4.peg.863	fig|636.4.peg.205
ETAE_1700		CytoplasmicMembrane	Na(+)-translocating NADH-quinone reductase subunit E	fig|718251.4.peg.1580	fig|667120.3.peg.1452	fig|67780.5.peg.2976	fig|634503.5.peg.1948	fig|667121.3.peg.60	fig|500638.4.peg.854	fig|636.4.peg.1115
ETAE_1701		CytoplasmicMembrane	hypothetical protein	fig|718251.4.peg.1581	fig|667120.3.peg.1451	fig|67780.5.peg.2977	fig|634503.5.peg.1947	fig|667121.3.peg.59	fig|500638.4.peg.853	fig|636.4.peg.1116
ETAE_1705	add	Cytoplasmic	adenosine deaminase	fig|718251.4.peg.1585	fig|667120.3.peg.1446	fig|67780.5.peg.2980	fig|634503.5.peg.1944	fig|667121.3.peg.54	fig|500638.4.peg.848	fig|636.4.peg.2998
ETAE_1706		Unknown	hypothetical protein	fig|718251.4.peg.1586	fig|667120.3.peg.1445	fig|67780.5.peg.2981	fig|634503.5.peg.1943	fig|667121.3.peg.53	fig|500638.4.peg.847	fig|636.4.peg.2997
ETAE_1707	manA	Cytoplasmic	mannose-6-phosphate isomerase, class I	fig|718251.4.peg.1587	fig|667120.3.peg.1444	fig|67780.5.peg.2982	fig|634503.5.peg.1942	fig|667121.3.peg.52	fig|500638.4.peg.846	fig|636.4.peg.2996
ETAE_1710		CytoplasmicMembrane	major facilitator superfamily MFS_1	fig|718251.4.peg.1590	fig|667120.3.peg.1440	fig|67780.5.peg.2987	fig|634503.5.peg.1938	fig|667121.3.peg.49	fig|500638.4.peg.843	fig|636.4.peg.2993
ETAE_1711		Cytoplasmic	probable LysR-family transcriptional regulator	fig|718251.4.peg.1591	fig|667120.3.peg.1439	fig|67780.5.peg.2988	fig|634503.5.peg.1937	fig|667121.3.peg.48	fig|500638.4.peg.842	fig|636.4.peg.2992
ETAE_1713		Cytoplasmic	ROK family transcriptional regulatory protein	fig|718251.4.peg.1592	fig|667120.3.peg.1438	fig|67780.5.peg.2990	fig|634503.5.peg.1936	fig|667121.3.peg.47	fig|500638.4.peg.841	fig|636.4.peg.2991
ETAE_1714	bioD	Unknown	dethiobiotin synthetase	fig|718251.4.peg.1593	fig|667120.3.peg.1437	fig|67780.5.peg.2991	fig|634503.5.peg.1935	fig|667121.3.peg.46	fig|500638.4.peg.840	fig|636.4.peg.2990
ETAE_1715	yhjA	Periplasmic	probable cytochrome C peroxidase	fig|718251.4.peg.1594	fig|667120.3.peg.1436	fig|67780.5.peg.2992	fig|634503.5.peg.1934	fig|667121.3.peg.45	fig|500638.4.peg.839	fig|636.4.peg.2989
ETAE_1721		CytoplasmicMembrane	transporter	fig|718251.4.peg.1599	fig|667120.3.peg.1432	fig|67780.5.peg.1012	fig|634503.5.peg.1858	fig|667121.3.peg.41	fig|500638.4.peg.835	fig|636.4.peg.2985
ETAE_1723		Unknown	hypothetical protein	fig|718251.4.peg.1601	fig|667120.3.peg.1430	fig|67780.5.peg.1010	fig|634503.5.peg.1856	fig|667121.3.peg.39	fig|500638.4.peg.833	fig|636.4.peg.2983
ETAE_1724		Cytoplasmic	short-chain alcohol dehydrogenase of unknown specificity	fig|718251.4.peg.1602	fig|667120.3.peg.1429	fig|67780.5.peg.1009	fig|634503.5.peg.1855	fig|667121.3.peg.38	fig|500638.4.peg.832	fig|636.4.peg.2982
ETAE_1727	uspA	Unknown	universal stress protein A	fig|718251.4.peg.1605	fig|667120.3.peg.1426	fig|67780.5.peg.45	fig|634503.5.peg.1854	fig|667121.3.peg.36	fig|500638.4.peg.830	fig|636.4.peg.2979
ETAE_1744	fnr	Cytoplasmic	fumarate/nitrate reduction transcriptional regulator	fig|718251.4.peg.1620	fig|667120.3.peg.1411	fig|67780.5.peg.27	fig|634503.5.peg.1836	fig|667121.3.peg.26	fig|500638.4.peg.820	fig|636.4.peg.2969
ETAE_1745	uspE	Cytoplasmic	universal stress protein	fig|718251.4.peg.1622	fig|667120.3.peg.1410	fig|67780.5.peg.26	fig|634503.5.peg.1835	fig|667121.3.peg.25	fig|500638.4.peg.819	fig|636.4.peg.2968
ETAE_1747	pntB	CytoplasmicMembrane	pyridine nucleotide transhydrogenase	fig|718251.4.peg.1623	fig|667120.3.peg.1409	fig|67780.5.peg.25	fig|634503.5.peg.1834	fig|667121.3.peg.24	fig|500638.4.peg.818	fig|636.4.peg.2967
ETAE_1748	pntA	CytoplasmicMembrane	NAD(P) transhydrogenase, alpha subunit	fig|718251.4.peg.1624	fig|667120.3.peg.1408	fig|67780.5.peg.24	fig|634503.5.peg.1833	fig|667121.3.peg.23	fig|500638.4.peg.817	fig|636.4.peg.2966
ETAE_1749		Unknown	antigenic protein Et 32	fig|718251.4.peg.1625	fig|667120.3.peg.1407	fig|67780.5.peg.23	fig|634503.5.peg.1832	fig|667121.3.peg.22	fig|500638.4.peg.816	fig|636.4.peg.2965
ETAE_1750	arcD	CytoplasmicMembrane	arginine/ornithine antiporter	fig|718251.4.peg.1626	fig|667120.3.peg.1406	fig|67780.5.peg.21	fig|634503.5.peg.1831	fig|667121.3.peg.21	fig|500638.4.peg.815	fig|636.4.peg.2964
ETAE_1751		Unknown	hypothetical protein	fig|718251.4.peg.1627	fig|667120.3.peg.1405	fig|67780.5.peg.20	fig|634503.5.peg.1830	fig|667121.3.peg.20	fig|500638.4.peg.814	fig|636.4.peg.2963
ETAE_1753		Unknown	short-chain dehydrogenase/reductase	fig|718251.4.peg.1628	fig|667120.3.peg.1402	fig|67780.5.peg.19	fig|634503.5.peg.1829	fig|667121.3.peg.19	fig|500638.4.peg.813	fig|636.4.peg.2961
ETAE_1754	rstA	Cytoplasmic	DNA-binding response regulator in two-component regulatory system with RstB	fig|718251.4.peg.1629	fig|667120.3.peg.1401	fig|67780.5.peg.1360	fig|634503.5.peg.1827	fig|667121.3.peg.18	fig|500638.4.peg.812	fig|636.4.peg.2960
ETAE_1755	rstB	CytoplasmicMembrane	sensor protein	fig|718251.4.peg.1630	fig|667120.3.peg.1400	fig|67780.5.peg.1361	fig|634503.5.peg.1826	fig|667121.3.peg.17	fig|500638.4.peg.811	fig|636.4.peg.2959
ETAE_1756		Cytoplasmic	Zn-dependent carboxypeptidase	fig|718251.4.peg.1631	fig|667120.3.peg.1399	fig|67780.5.peg.1362	fig|634503.5.peg.1825	fig|667121.3.peg.16	fig|500638.4.peg.810	fig|636.4.peg.2958
ETAE_1768		Unknown	hypothetical protein	fig|718251.4.peg.1643	fig|667120.3.peg.1390	fig|67780.5.peg.1527	fig|634503.5.peg.1816	fig|667121.3.peg.10	fig|500638.4.peg.802	fig|636.4.peg.2953
ETAE_1769		Unknown	putative lipoprotein	fig|718251.4.peg.1644	fig|667120.3.peg.1389	fig|67780.5.peg.1526	fig|634503.5.peg.1815	fig|667121.3.peg.9	fig|500638.4.peg.801	fig|636.4.peg.2952
ETAE_1770		OuterMembrane	hypothetical protein	fig|718251.4.peg.1645	fig|667120.3.peg.1388	fig|67780.5.peg.1525	fig|634503.5.peg.1814	fig|667121.3.peg.8	fig|500638.4.peg.800	fig|636.4.peg.2951
ETAE_1771	ldhA	Cytoplasmic	D-lactate dehydrogenase	fig|718251.4.peg.1646	fig|667120.3.peg.1387	fig|67780.5.peg.1524	fig|634503.5.peg.1813	fig|667121.3.peg.7	fig|500638.4.peg.799	fig|636.4.peg.2950
ETAE_1773		Unknown	glycogen synthesis protein	fig|718251.4.peg.1647	fig|667120.3.peg.1386	fig|67780.5.peg.1523	fig|634503.5.peg.1812	fig|667121.3.peg.6	fig|500638.4.peg.798	fig|636.4.peg.2949
ETAE_1776	mgtc	CytoplasmicMembrane	putative Mg(2+) transport ATPase	fig|718251.4.peg.1650	fig|667120.3.peg.1382	fig|67780.5.peg.1519	fig|634503.5.peg.1809	fig|667121.3.peg.3	fig|500638.4.peg.795	fig|636.4.peg.2946
ETAE_1781	ydaO	Cytoplasmic	C32 tRNA thiolase	fig|718251.4.peg.1655	fig|667120.3.peg.1377	fig|67780.5.peg.1514	fig|634503.5.peg.1804	fig|667121.3.peg.1720	fig|500638.4.peg.789	fig|636.4.peg.2940
ETAE_1782	zntB	Cytoplasmic	zinc transporter	fig|718251.4.peg.1656	fig|667120.3.peg.1376	fig|67780.5.peg.1513	fig|634503.5.peg.1803	fig|667121.3.peg.1719	fig|500638.4.peg.788	fig|636.4.peg.2939
ETAE_1783		Cytoplasmic	hypothetical protein	fig|718251.4.peg.1657	fig|667120.3.peg.1375	fig|67780.5.peg.1512	fig|634503.5.peg.1802	fig|667121.3.peg.1718	fig|500638.4.peg.787	fig|636.4.peg.2938
ETAE_1786		CytoplasmicMembrane	predicted permease	fig|718251.4.peg.1660	fig|667120.3.peg.1373	fig|67780.5.peg.1509	fig|634503.5.peg.1799	fig|667121.3.peg.1716	fig|500638.4.peg.786	fig|636.4.peg.2936
ETAE_1789	ppsA	Cytoplasmic	phosphoenolpyruvate synthase	fig|718251.4.peg.1663	fig|667120.3.peg.1371	fig|67780.5.peg.1506	fig|634503.5.peg.1796	fig|667121.3.peg.1715	fig|500638.4.peg.785	fig|636.4.peg.2935
ETAE_1792	aroH	Cytoplasmic	3-deoxy-7-phosphoheptulonate synthase	fig|718251.4.peg.1666	fig|667120.3.peg.1369	fig|67780.5.peg.1504	fig|634503.5.peg.1794	fig|667121.3.peg.1713	fig|500638.4.peg.783	fig|636.4.peg.2933
ETAE_1794		Cytoplasmic	putative heme iron utilization protein	fig|718251.4.peg.1668	fig|667120.3.peg.1367	fig|67780.5.peg.1502	fig|634503.5.peg.1792	fig|667121.3.peg.1711	fig|500638.4.peg.767	fig|636.4.peg.2931
ETAE_1795		Unknown	hypothetical protein	fig|718251.4.peg.1669	fig|667120.3.peg.1366	fig|67780.5.peg.1501	fig|634503.5.peg.1791	fig|667121.3.peg.1710	fig|500638.4.peg.766	fig|636.4.peg.2930
ETAE_1798	hemS	Unknown	hemin transport protein	fig|718251.4.peg.1672	fig|667120.3.peg.1363	fig|67780.5.peg.1498	fig|634503.5.peg.1788	fig|667121.3.peg.2414	fig|500638.4.peg.763	fig|636.4.peg.2927
ETAE_1799	hmuT	Periplasmic	hemin-binding periplasmic protein	fig|718251.4.peg.1673	fig|667120.3.peg.1362	fig|67780.5.peg.1497	fig|634503.5.peg.1787	fig|667121.3.peg.2415	fig|500638.4.peg.762	fig|636.4.peg.2926
ETAE_1801	hmuV	Unknown	hemin transport system ATP-binding protein	fig|718251.4.peg.1675	fig|667120.3.peg.1360	fig|67780.5.peg.1495	fig|634503.5.peg.1785	fig|667121.3.peg.2417	fig|500638.4.peg.760	fig|636.4.peg.2924
ETAE_1802		CytoplasmicMembrane	purine-cytosine permease	fig|718251.4.peg.1676	fig|667120.3.peg.1359	fig|67780.5.peg.1494	fig|634503.5.peg.1784	fig|667121.3.peg.2418	fig|500638.4.peg.759	fig|636.4.peg.2923
ETAE_1805	nlpC	Unknown	lipoprotein	fig|718251.4.peg.1679	fig|667120.3.peg.1356	fig|67780.5.peg.1491	fig|634503.5.peg.1781	fig|667121.3.peg.2420	fig|500638.4.peg.756	fig|636.4.peg.2921
ETAE_1806	btuD	Unknown	vitamin B12-transporter ATPase	fig|718251.4.peg.1680	fig|667120.3.peg.1355	fig|67780.5.peg.1485	fig|634503.5.peg.1776	fig|667121.3.peg.2421	fig|500638.4.peg.755	fig|636.4.peg.2920
ETAE_1808		Unknown	hypothetical protein	fig|718251.4.peg.1682	fig|667120.3.peg.1353	fig|67780.5.peg.1483	fig|634503.5.peg.1774	fig|667121.3.peg.2423	fig|500638.4.peg.754	fig|636.4.peg.2918
ETAE_1809		Cytoplasmic	integration host factor, alpha subunit	fig|718251.4.peg.1683	fig|667120.3.peg.1352	fig|67780.5.peg.1482	fig|634503.5.peg.1773	fig|667121.3.peg.2424	fig|500638.4.peg.753	fig|636.4.peg.2917
ETAE_1810	pheT	Cytoplasmic	phenylalanyl-tRNA synthetase beta subunit	fig|718251.4.peg.1684	fig|667120.3.peg.1351	fig|67780.5.peg.1481	fig|634503.5.peg.1772	fig|667121.3.peg.2425	fig|500638.4.peg.752	fig|636.4.peg.2916
ETAE_1811	pheS	Cytoplasmic	phenylalanyl-tRNA synthetase alpha subunit	fig|718251.4.peg.1685	fig|667120.3.peg.1350	fig|67780.5.peg.1480	fig|634503.5.peg.1771	fig|667121.3.peg.2426	fig|500638.4.peg.751	fig|636.4.peg.2915
ETAE_1813	rpmI	Unknown	50S ribosomal protein L35	fig|718251.4.peg.1687	fig|667120.3.peg.1348	fig|67780.5.peg.1478	fig|634503.5.peg.1769	fig|667121.3.peg.2428	fig|500638.4.peg.749	fig|636.4.peg.2913
ETAE_1814	infC	Cytoplasmic	translation initiation factor IF-3	fig|718251.4.peg.1688	fig|667120.3.peg.1347	fig|67780.5.peg.1477	fig|634503.5.peg.1768	fig|667121.3.peg.2429	fig|500638.4.peg.748	fig|636.4.peg.2912
ETAE_1815	thrS	Cytoplasmic	threonyl-tRNA synthetase	fig|718251.4.peg.1689	fig|667120.3.peg.1346	fig|67780.5.peg.1476	fig|634503.5.peg.1767	fig|667121.3.peg.2430	fig|500638.4.peg.747	fig|636.4.peg.2911
ETAE_1821	dps	Unknown	DNA starvation/stationary phase protection protein	fig|718251.4.peg.1693	fig|667120.3.peg.1341	fig|67780.5.peg.1469	fig|634503.5.peg.1760	fig|667121.3.peg.1182	fig|500638.4.peg.743	fig|636.4.peg.2906
ETAE_1822	pfkB	Unknown	6-phosphofructokinase	fig|718251.4.peg.1694	fig|667120.3.peg.1340	fig|67780.5.peg.1468	fig|634503.5.peg.1759	fig|667121.3.peg.1183	fig|500638.4.peg.742	fig|636.4.peg.2905
ETAE_1827	pcaD	Cytoplasmic	beta-ketoadipate enol-lactone hydrolase	fig|718251.4.peg.1698	fig|667120.3.peg.1335	fig|67780.5.peg.1463	fig|634503.5.peg.1755	fig|667121.3.peg.1304	fig|500638.4.peg.738	fig|636.4.peg.2901
ETAE_1843	phsC	CytoplasmicMembrane	thiosulfate reductase cytochrome B subunit	fig|718251.4.peg.1711	fig|667120.3.peg.1319	fig|67780.5.peg.1447	fig|634503.5.peg.1739	fig|667121.3.peg.1155	fig|500638.4.peg.728	fig|636.4.peg.2889
ETAE_1849	cobD	Cytoplasmic	threonine-phosphate decarboxylase	fig|718251.4.peg.1716	fig|667120.3.peg.1313	fig|67780.5.peg.1440	fig|634503.5.peg.1733	fig|667121.3.peg.3085	fig|500638.4.peg.2741	fig|636.4.peg.2882
ETAE_1850	pyk	Cytoplasmic	pyruvate kinase	fig|718251.4.peg.1717	fig|667120.3.peg.1312	fig|67780.5.peg.1439	fig|634503.5.peg.1732	fig|667121.3.peg.3086	fig|500638.4.peg.2740	fig|636.4.peg.2881
ETAE_1852		Unknown	murein lipoprotein	fig|718251.4.peg.1719	fig|667120.3.peg.1310	fig|67780.5.peg.1438	fig|634503.5.peg.1731	fig|667121.3.peg.3087	fig|500638.4.peg.2739	fig|636.4.peg.2880
ETAE_1854		Unknown	hypothetical protein	fig|718251.4.peg.1720	fig|667120.3.peg.1309	fig|67780.5.peg.1437	fig|634503.5.peg.1730	fig|667121.3.peg.3088	fig|500638.4.peg.2738	fig|636.4.peg.2879
ETAE_1859	tpx	Unknown	thiol peroxidase	fig|718251.4.peg.1724	fig|667120.3.peg.1307	fig|67780.5.peg.1433	fig|634503.5.peg.1726	fig|667121.3.peg.3090	fig|500638.4.peg.2736	fig|636.4.peg.2877
ETAE_1860	tyrR	Cytoplasmic	transcriptional regulator	fig|718251.4.peg.1725	fig|667120.3.peg.1306	fig|67780.5.peg.1432	fig|634503.5.peg.1725	fig|667121.3.peg.3091	fig|500638.4.peg.2735	fig|636.4.peg.2876
ETAE_1863		Cytoplasmic	predicted ATPase	fig|718251.4.peg.1728	fig|667120.3.peg.1303	fig|67780.5.peg.1429	fig|634503.5.peg.1722	fig|667121.3.peg.3094	fig|500638.4.peg.2733	fig|636.4.peg.2872
ETAE_1865	pspB	Unknown	phage shock protein B	fig|718251.4.peg.1731	fig|667120.3.peg.1300	fig|67780.5.peg.1426	fig|634503.5.peg.1719	fig|667121.3.peg.3097	fig|500638.4.peg.658	fig|636.4.peg.2869
ETAE_1868	pspF	Cytoplasmic	phage shock protein operon transcriptional activator	fig|718251.4.peg.1733	fig|667120.3.peg.1298	fig|67780.5.peg.1424	fig|634503.5.peg.1717	fig|667121.3.peg.3099	fig|500638.4.peg.2731	fig|636.4.peg.2867
ETAE_1870	sapA	Periplasmic	ABC transporter, periplasmic peptide binding protein	fig|718251.4.peg.1734	fig|667120.3.peg.1296	fig|67780.5.peg.1423	fig|634503.5.peg.1716	fig|667121.3.peg.3100	fig|500638.4.peg.2730	fig|636.4.peg.2866
ETAE_1871	sapB	CytoplasmicMembrane	peptide transport system permease protein	fig|718251.4.peg.1735	fig|667120.3.peg.1295	fig|67780.5.peg.1422	fig|634503.5.peg.1715	fig|667121.3.peg.3101	fig|500638.4.peg.2729	fig|636.4.peg.2865
ETAE_1873	sapD	CytoplasmicMembrane	peptide transport system ATP-binding protein	fig|718251.4.peg.1737	fig|667120.3.peg.1293	fig|67780.5.peg.1420	fig|634503.5.peg.1713	fig|667121.3.peg.3103	fig|500638.4.peg.2723	fig|636.4.peg.2863
ETAE_1874	sapF	Cytoplasmic	peptide transport system ATP-binding protein	fig|718251.4.peg.1738	fig|667120.3.peg.1292	fig|67780.5.peg.1419	fig|634503.5.peg.1712	fig|667121.3.peg.3104	fig|500638.4.peg.2722	fig|636.4.peg.2862
ETAE_1876		Unknown	trans-2-enoyl-CoA reductase	fig|718251.4.peg.1740	fig|667120.3.peg.1290	fig|67780.5.peg.1417	fig|634503.5.peg.1710	fig|667121.3.peg.3108	fig|500638.4.peg.2717	fig|636.4.peg.2858
ETAE_1877	amn	Unknown	AMP nucleosidase	fig|718251.4.peg.1741	fig|667120.3.peg.1289	fig|67780.5.peg.1416	fig|634503.5.peg.1709	fig|667121.3.peg.3109	fig|500638.4.peg.2716	fig|636.4.peg.2857
ETAE_1878	rnb	Unknown	exoribonuclease II	fig|718251.4.peg.1742	fig|667120.3.peg.1288	fig|67780.5.peg.1415	fig|634503.5.peg.1708	fig|667121.3.peg.3110	fig|500638.4.peg.2715	fig|636.4.peg.2856
ETAE_1880		Cytoplasmic	peptidase T	fig|718251.4.peg.1744	fig|667120.3.peg.1286	fig|67780.5.peg.1413	fig|634503.5.peg.1706	fig|667121.3.peg.3113	fig|500638.4.peg.2712	fig|636.4.peg.2853
ETAE_1881	potA	Cytoplasmic	putrescine/spermidine ABC transporter ATPase protein	fig|718251.4.peg.1745	fig|667120.3.peg.1285	fig|67780.5.peg.1412	fig|634503.5.peg.1705	fig|667121.3.peg.3114	fig|500638.4.peg.2711	fig|636.4.peg.2852
ETAE_1882	potB	CytoplasmicMembrane	spermidine/putrescine ABC transporter membrane protein	fig|718251.4.peg.1746	fig|667120.3.peg.1284	fig|67780.5.peg.1411	fig|634503.5.peg.1704	fig|667121.3.peg.3115	fig|500638.4.peg.2710	fig|636.4.peg.2851
ETAE_1883	potC	CytoplasmicMembrane	spermidine/putrescine ABC transporter membrane protein	fig|718251.4.peg.1747	fig|667120.3.peg.1283	fig|67780.5.peg.1410	fig|634503.5.peg.1703	fig|667121.3.peg.3116	fig|500638.4.peg.2709	fig|636.4.peg.2850
ETAE_1886	potD	Periplasmic	spermidine/putrescine ABC transporter periplasmic protein	fig|718251.4.peg.1749	fig|667120.3.peg.1281	fig|67780.5.peg.1409	fig|634503.5.peg.1702	fig|667121.3.peg.3118	fig|500638.4.peg.2707	fig|636.4.peg.2848
ETAE_1888	nagZ	Cytoplasmic	beta-N-acetylhexosaminidase	fig|718251.4.peg.1751	fig|667120.3.peg.1279	fig|67780.5.peg.1407	fig|634503.5.peg.1699	fig|667121.3.peg.3120	fig|500638.4.peg.2705	fig|636.4.peg.2846
ETAE_1891		Unknown	hypothetical protein	fig|718251.4.peg.1754	fig|667120.3.peg.1276	fig|67780.5.peg.1404	fig|634503.5.peg.1695	fig|667121.3.peg.3123	fig|500638.4.peg.2702	fig|636.4.peg.2843
ETAE_1892		Cytoplasmic	histidine triad (HIT) protein	fig|718251.4.peg.1755	fig|667120.3.peg.1275	fig|67780.5.peg.1403	fig|634503.5.peg.1694	fig|667121.3.peg.3124	fig|500638.4.peg.2701	fig|636.4.peg.2842
ETAE_1898	kduI	Cytoplasmic	5-keto 4-deoxyuronate isomerase	fig|718251.4.peg.1760	fig|667120.3.peg.1268	fig|67780.5.peg.1396	fig|634503.5.peg.1686	fig|667121.3.peg.1448	fig|500638.4.peg.2698	fig|636.4.peg.2839
ETAE_1899	kduD	Cytoplasmic	2-deoxy-D-gluconate 3-dehydrogenase	fig|718251.4.peg.1761	fig|667120.3.peg.1267	fig|67780.5.peg.1395	fig|634503.5.peg.1685	fig|667121.3.peg.1449	fig|500638.4.peg.2697	fig|636.4.peg.2838
ETAE_1900		Cytoplasmic	hypothetical protein	fig|718251.4.peg.1762	fig|667120.3.peg.1265	fig|67780.5.peg.1394	fig|634503.5.peg.1684	fig|667121.3.peg.1450	fig|500638.4.peg.2696	fig|636.4.peg.2837
ETAE_1909		Cytoplasmic	universal stress protein UP12	fig|718251.4.peg.1770	fig|667120.3.peg.3433	fig|67780.5.peg.1380	fig|634503.5.peg.1672	fig|667121.3.peg.1346	fig|500638.4.peg.1022	fig|636.4.peg.2569
ETAE_1916		Unknown	hypothetical protein	fig|718251.4.peg.1777	fig|667120.3.peg.3423	fig|67780.5.peg.1374	fig|634503.5.peg.1664	fig|667121.3.peg.919	fig|500638.4.peg.1029	fig|636.4.peg.2576
ETAE_1918	melR	Unknown	DNA-binding transcriptional dual regulator	fig|718251.4.peg.1779	fig|667120.3.peg.3421	fig|67780.5.peg.1371	fig|634503.5.peg.1661	fig|667121.3.peg.916	fig|500638.4.peg.1033	fig|636.4.peg.2579
ETAE_1930	ipdC	Unknown	similar to indole-3-pyruvate decarboxylase	fig|718251.4.peg.1791	fig|667120.3.peg.3413	fig|67780.5.peg.1366	fig|634503.5.peg.1656	fig|667121.3.peg.3212	fig|500638.4.peg.227	fig|636.4.peg.3054
ETAE_1964	rpmJ	Unknown	50S ribosomal protein L36	fig|718251.4.peg.1822	fig|667120.3.peg.561	fig|67780.5.peg.948	fig|634503.5.peg.2024	fig|667121.3.peg.2598	fig|500638.4.peg.1134	fig|636.4.peg.2637
ETAE_1987		Unknown	bacterial pre-peptidase C-terminal domain protein	fig|718251.4.peg.1845	fig|667120.3.peg.537	fig|67780.5.peg.936	fig|634503.5.peg.2036	fig|667121.3.peg.2712	fig|500638.4.peg.1155	fig|636.4.peg.963
ETAE_2003	cbiB	CytoplasmicMembrane	cobalamin biosynthesis protein	fig|718251.4.peg.1861	fig|667120.3.peg.523	fig|67780.5.peg.922	fig|634503.5.peg.2050	fig|667121.3.peg.2381	fig|500638.4.peg.1167	fig|636.4.peg.978
ETAE_2043	pgsA	CytoplasmicMembrane	phosphatidylglycerophosphate synthase	fig|718251.4.peg.1895	fig|667120.3.peg.3316	fig|67780.5.peg.3439	fig|634503.5.peg.2123	fig|667121.3.peg.354	fig|500638.4.peg.1201	fig|636.4.peg.1041
ETAE_2044	uvrC	Cytoplasmic	excinuclease ABC subunit C	fig|718251.4.peg.1896	fig|667120.3.peg.3317	fig|67780.5.peg.3440	fig|634503.5.peg.2124	fig|667121.3.peg.353	fig|500638.4.peg.1202	fig|636.4.peg.1042
ETAE_2045	uvrY	Cytoplasmic	two-component transcriptional regulator, LuxR family	fig|718251.4.peg.1897	fig|667120.3.peg.3318	fig|67780.5.peg.3441	fig|634503.5.peg.2125	fig|667121.3.peg.352	fig|500638.4.peg.1203	fig|636.4.peg.1043
ETAE_2046		Unknown	hypothetical protein	fig|718251.4.peg.1898	fig|667120.3.peg.3320	fig|67780.5.peg.3442	fig|634503.5.peg.2126	fig|667121.3.peg.351	fig|500638.4.peg.1204	fig|636.4.peg.1044
ETAE_2050		Cytoplasmic	isocitrate dehydrogenase, specific for NADP+	fig|718251.4.peg.1901	fig|667120.3.peg.3324	fig|67780.5.peg.3387	fig|634503.5.peg.2153	fig|667121.3.peg.349	fig|500638.4.peg.1206	fig|636.4.peg.1046
ETAE_2051		Unknown	ribosomal large subunit pseudouridine synthase	fig|718251.4.peg.1902	fig|667120.3.peg.3325	fig|67780.5.peg.3388	fig|634503.5.peg.2154	fig|667121.3.peg.348	fig|500638.4.peg.1207	fig|636.4.peg.1047
ETAE_2052		Cytoplasmic	phosphohydrolase	fig|718251.4.peg.1903	fig|667120.3.peg.3326	fig|67780.5.peg.3389	fig|634503.5.peg.2155	fig|667121.3.peg.2790	fig|500638.4.peg.1208	fig|636.4.peg.1048
ETAE_2053	trmU	Unknown	tRNA (5-methylaminomethyl-2-thiouridylate)-methyltransferase	fig|718251.4.peg.1904	fig|667120.3.peg.3327	fig|67780.5.peg.3390	fig|634503.5.peg.2156	fig|667121.3.peg.2789	fig|500638.4.peg.1209	fig|636.4.peg.1049
ETAE_2054		CytoplasmicMembrane	hypothetical protein	fig|718251.4.peg.1905	fig|667120.3.peg.3328	fig|67780.5.peg.3391	fig|634503.5.peg.2157	fig|667121.3.peg.2788	fig|500638.4.peg.1210	fig|636.4.peg.1050
ETAE_2055		Unknown	hypothetical protein	fig|718251.4.peg.1906	fig|667120.3.peg.3329	fig|67780.5.peg.3392	fig|634503.5.peg.2158	fig|667121.3.peg.2787	fig|500638.4.peg.1211	fig|636.4.peg.1051
ETAE_2056	purB	Cytoplasmic	adenylosuccinate lyase	fig|718251.4.peg.1907	fig|667120.3.peg.3330	fig|67780.5.peg.3393	fig|634503.5.peg.2159	fig|667121.3.peg.2786	fig|500638.4.peg.1212	fig|636.4.peg.1052
ETAE_2057		Unknown	putative transcriptional regulator	fig|718251.4.peg.1908	fig|667120.3.peg.3331	fig|67780.5.peg.3394	fig|634503.5.peg.2160	fig|667121.3.peg.2785	fig|500638.4.peg.1213	fig|636.4.peg.1053
ETAE_2058	draG	Unknown	ADP-ribosylglycohydrolase family protein	fig|718251.4.peg.1909	fig|667120.3.peg.3332	fig|67780.5.peg.3395	fig|634503.5.peg.2161	fig|667121.3.peg.2784	fig|500638.4.peg.1214	fig|636.4.peg.1054
ETAE_2059	phoP	Cytoplasmic	two-component transcriptional regulator, winged helix family	fig|718251.4.peg.1910	fig|667120.3.peg.3333	fig|67780.5.peg.3396	fig|634503.5.peg.2162	fig|667121.3.peg.2783	fig|500638.4.peg.1215	fig|636.4.peg.1055
ETAE_2060	phoQ	CytoplasmicMembrane	sensor protein	fig|718251.4.peg.1911	fig|667120.3.peg.3334	fig|67780.5.peg.3397	fig|634503.5.peg.2163	fig|667121.3.peg.2782	fig|500638.4.peg.1216	fig|636.4.peg.1056
ETAE_2061		Cytoplasmic	cupin 4 family protein	fig|718251.4.peg.1912	fig|667120.3.peg.3335	fig|67780.5.peg.3398	fig|634503.5.peg.2164	fig|667121.3.peg.2781	fig|500638.4.peg.1217	fig|636.4.peg.1057
ETAE_2062	cobB	Cytoplasmic	NAD-dependent deacetylase	fig|718251.4.peg.1913	fig|667120.3.peg.3336	fig|67780.5.peg.3399	fig|634503.5.peg.2165	fig|667121.3.peg.2780	fig|500638.4.peg.1218	fig|636.4.peg.1058
ETAE_2063	nagK	Cytoplasmic	N-acetyl-D-glucosamine kinase	fig|718251.4.peg.1914	fig|667120.3.peg.3337	fig|67780.5.peg.3400	fig|634503.5.peg.2166	fig|667121.3.peg.2779	fig|500638.4.peg.1219	fig|636.4.peg.1059
ETAE_2064	lolE	CytoplasmicMembrane	lipoprotein releasing system, transmembrane protein	fig|718251.4.peg.1915	fig|667120.3.peg.3338	fig|67780.5.peg.3401	fig|634503.5.peg.2167	fig|667121.3.peg.2778	fig|500638.4.peg.1220	fig|636.4.peg.1060
ETAE_2065	lolD	CytoplasmicMembrane	lipoprotein releasing system, ATP-binding protein	fig|718251.4.peg.1916	fig|667120.3.peg.3339	fig|67780.5.peg.3402	fig|634503.5.peg.2168	fig|667121.3.peg.2777	fig|500638.4.peg.1221	fig|636.4.peg.1061
ETAE_2067		Unknown	transcription-repair coupling factor (superfamily II helicase)	fig|718251.4.peg.1918	fig|667120.3.peg.3341	fig|67780.5.peg.3405	fig|634503.5.peg.2170	fig|667121.3.peg.2774	fig|500638.4.peg.1223	fig|636.4.peg.1064
ETAE_2068		Unknown	hypothetical protein	fig|718251.4.peg.1919	fig|667120.3.peg.3342	fig|67780.5.peg.3406	fig|634503.5.peg.2171	fig|667121.3.peg.2773	fig|500638.4.peg.1224	fig|636.4.peg.1065
ETAE_2069		CytoplasmicMembrane	hypothetical protein	fig|718251.4.peg.1920	fig|667120.3.peg.3343	fig|67780.5.peg.3407	fig|634503.5.peg.2172	fig|667121.3.peg.2772	fig|500638.4.peg.1225	fig|636.4.peg.1066
ETAE_2070	ndh	Unknown	NADH dehydrogenase, FAD-containing subunit	fig|718251.4.peg.1921	fig|667120.3.peg.3344	fig|67780.5.peg.3408	fig|634503.5.peg.2173	fig|667121.3.peg.2771	fig|500638.4.peg.1226	fig|636.4.peg.1067
ETAE_2072		Unknown	DNA damage-inducible protein I	fig|718251.4.peg.1923	fig|667120.3.peg.3346	fig|67780.5.peg.3412	fig|634503.5.peg.2176	fig|667121.3.peg.2769	fig|500638.4.peg.1227	fig|636.4.peg.1070
ETAE_2073	bssS	Unknown	biofilm formation regulatory protein	fig|718251.4.peg.1924	fig|667120.3.peg.3347	fig|67780.5.peg.3413	fig|634503.5.peg.2177	fig|667121.3.peg.2768	fig|500638.4.peg.1228	fig|636.4.peg.1071
ETAE_2078		Unknown	hypothetical protein	fig|718251.4.peg.1929	fig|667120.3.peg.3353	fig|67780.5.peg.3417	fig|634503.5.peg.2181	fig|667121.3.peg.2763	fig|500638.4.peg.1233	fig|636.4.peg.1076
ETAE_2079		CytoplasmicMembrane	DedA-family membrane protein	fig|718251.4.peg.1930	fig|667120.3.peg.3355	fig|67780.5.peg.3419	fig|634503.5.peg.2183	fig|667121.3.peg.2762	fig|500638.4.peg.1234	fig|636.4.peg.1077
ETAE_2081	yciH	Unknown	translation initiation factor Sui1	fig|718251.4.peg.1932	fig|667120.3.peg.3357	fig|67780.5.peg.3421	fig|634503.5.peg.2185	fig|667121.3.peg.2760	fig|500638.4.peg.1236	fig|636.4.peg.1079
ETAE_2082	pyrF	Unknown	OMP decarboxylase; OMPDCase; OMPdecase	fig|718251.4.peg.1933	fig|667120.3.peg.3358	fig|67780.5.peg.3422	fig|634503.5.peg.2186	fig|667121.3.peg.2759	fig|500638.4.peg.1237	fig|636.4.peg.1080
ETAE_2083		Cytoplasmic	hypothetical protein	fig|718251.4.peg.1934	fig|667120.3.peg.3359	fig|67780.5.peg.3423	fig|634503.5.peg.2187	fig|667121.3.peg.2758	fig|500638.4.peg.1238	fig|636.4.peg.1081
ETAE_2084		Unknown	hypothetical protein	fig|718251.4.peg.1935	fig|667120.3.peg.3360	fig|67780.5.peg.3424	fig|634503.5.peg.2188	fig|667121.3.peg.2757	fig|500638.4.peg.1239	fig|636.4.peg.1082
ETAE_2086	ribA	Cytoplasmic	GTP cyclohydrolase II	fig|718251.4.peg.1937	fig|667120.3.peg.3362	fig|67780.5.peg.3426	fig|634503.5.peg.2190	fig|667121.3.peg.2756	fig|500638.4.peg.1240	fig|636.4.peg.1083
ETAE_2090	ptsG	CytoplasmicMembrane	PTS system, glucose-specific IIBC subunit	fig|718251.4.peg.1941	fig|667120.3.peg.3636	fig|67780.5.peg.1242	fig|634503.5.peg.2198	fig|667121.3.peg.2755	fig|500638.4.peg.1242	fig|636.4.peg.1084
ETAE_2092	tatD	Unknown	TatD DNase family protein	fig|718251.4.peg.1943	fig|667120.3.peg.3634	fig|67780.5.peg.1243	fig|634503.5.peg.2199	fig|667121.3.peg.2754	fig|500638.4.peg.1243	fig|636.4.peg.1085
ETAE_2093	holB	Unknown	DNA polymerase III subunit delta'	fig|718251.4.peg.1944	fig|667120.3.peg.3633	fig|67780.5.peg.1244	fig|634503.5.peg.2200	fig|667121.3.peg.2753	fig|500638.4.peg.1244	fig|636.4.peg.1086
ETAE_2094	tmk	Cytoplasmic	thymidylate kinase	fig|718251.4.peg.1945	fig|667120.3.peg.3632	fig|67780.5.peg.1245	fig|634503.5.peg.2201	fig|667121.3.peg.2752	fig|500638.4.peg.1245	fig|636.4.peg.1087
ETAE_2095		Unknown	aminodeoxychorismate lyase	fig|718251.4.peg.1946	fig|667120.3.peg.3631	fig|67780.5.peg.1246	fig|634503.5.peg.2202	fig|667121.3.peg.2751	fig|500638.4.peg.1246	fig|636.4.peg.1088
ETAE_2097	fabF	Cytoplasmic	3-oxoacyl-(acyl carrier protein) synthase II	fig|718251.4.peg.1948	fig|667120.3.peg.3629	fig|67780.5.peg.1248	fig|634503.5.peg.2204	fig|667121.3.peg.2749	fig|500638.4.peg.1249	fig|636.4.peg.1090
ETAE_2098	acpP	Cytoplasmic	acyl carrier protein	fig|718251.4.peg.1949	fig|667120.3.peg.3628	fig|67780.5.peg.1249	fig|634503.5.peg.2205	fig|667121.3.peg.2748	fig|500638.4.peg.1250	fig|636.4.peg.1091
ETAE_2099	fabG	Cytoplasmic	3-ketoacyl-(acyl-carrier-protein) reductase	fig|718251.4.peg.1950	fig|667120.3.peg.3627	fig|67780.5.peg.1250	fig|634503.5.peg.2206	fig|667121.3.peg.2747	fig|500638.4.peg.1251	fig|636.4.peg.1092
ETAE_2100	fabD	Unknown	malonyl CoA-acyl carrier protein transacylase	fig|718251.4.peg.1951	fig|667120.3.peg.3626	fig|67780.5.peg.1251	fig|634503.5.peg.2207	fig|667121.3.peg.2746	fig|500638.4.peg.1252	fig|636.4.peg.1093
ETAE_2101	fabH	Unknown	3-oxoacyl-(acyl carrier protein) synthase III	fig|718251.4.peg.1952	fig|667120.3.peg.3625	fig|67780.5.peg.1252	fig|634503.5.peg.2208	fig|667121.3.peg.2745	fig|500638.4.peg.1253	fig|636.4.peg.1094
ETAE_2102		Unknown	fatty acid/phospholipid biosynthesis enzyme	fig|718251.4.peg.1953	fig|667120.3.peg.3624	fig|67780.5.peg.1253	fig|634503.5.peg.2209	fig|667121.3.peg.2744	fig|500638.4.peg.1254	fig|636.4.peg.1095
ETAE_2103	rpmF	Unknown	50S ribosomal protein L32	fig|718251.4.peg.1954	fig|667120.3.peg.3623	fig|67780.5.peg.1254	fig|634503.5.peg.2210	fig|667121.3.peg.2743	fig|500638.4.peg.1255	fig|636.4.peg.1096
ETAE_2105		Cytoplasmic	Maf-like protein	fig|718251.4.peg.1956	fig|667120.3.peg.3621	fig|67780.5.peg.1256	fig|634503.5.peg.2212	fig|667121.3.peg.2741	fig|500638.4.peg.1257	fig|636.4.peg.1098
ETAE_2108	rluC	Cytoplasmic	23S rRNA pseudouridylate synthase	fig|718251.4.peg.1958	fig|667120.3.peg.3618	fig|67780.5.peg.1258	fig|634503.5.peg.2214	fig|667121.3.peg.2739	fig|500638.4.peg.1258	fig|636.4.peg.1099
ETAE_2110		Cytoplasmic	hypothetical protein	fig|718251.4.peg.1960	fig|667120.3.peg.3615	fig|67780.5.peg.1262	fig|634503.5.peg.2218	fig|667121.3.peg.1839	fig|500638.4.peg.1262	fig|636.4.peg.1103
ETAE_2111		Cytoplasmic	dihydroorotase	fig|718251.4.peg.1961	fig|667120.3.peg.3614	fig|67780.5.peg.1263	fig|634503.5.peg.2219	fig|667121.3.peg.425	fig|500638.4.peg.1271	fig|636.4.peg.1104
ETAE_2112		CytoplasmicMembrane	ABC transporter-related protein	fig|718251.4.peg.1962	fig|667120.3.peg.3613	fig|67780.5.peg.1264	fig|634503.5.peg.2220	fig|667121.3.peg.426	fig|500638.4.peg.1272	fig|636.4.peg.1105
ETAE_2113	ybbM	CytoplasmicMembrane	putative metal resistance protein	fig|718251.4.peg.1963	fig|667120.3.peg.3612	fig|67780.5.peg.1265	fig|634503.5.peg.2221	fig|667121.3.peg.427	fig|500638.4.peg.1273	fig|636.4.peg.1106
ETAE_2114	fumA	Unknown	hydro-lyase, Fe-S type, tartrate/fumarate subfamily, beta subunit	fig|718251.4.peg.1964	fig|667120.3.peg.3611	fig|67780.5.peg.1266	fig|634503.5.peg.2222	fig|667121.3.peg.428	fig|500638.4.peg.1274	fig|636.4.peg.1107
ETAE_2124		CytoplasmicMembrane	ABC transporter-related protein	fig|718251.4.peg.1974	fig|667120.3.peg.3607	fig|67780.5.peg.1283	fig|634503.5.peg.2239	fig|667121.3.peg.430	fig|500638.4.peg.1275	fig|636.4.peg.1109
ETAE_2125	fliZ	Unknown	flagellin protein	fig|718251.4.peg.1975	fig|667120.3.peg.3606	fig|67780.5.peg.1284	fig|634503.5.peg.2240	fig|667121.3.peg.431	fig|500638.4.peg.1276	fig|636.4.peg.1110
ETAE_2126	fliA/rpoF	Cytoplasmic	flagellar biosynthesis sigma factor	fig|718251.4.peg.1976	fig|667120.3.peg.3605	fig|67780.5.peg.1285	fig|634503.5.peg.2241	fig|667121.3.peg.432	fig|500638.4.peg.1277	fig|636.4.peg.1111
ETAE_2132	fliD	Extracellular	flagellar hook-associated 2 domain protein	fig|718251.4.peg.1981	fig|667120.3.peg.3602	fig|67780.5.peg.1294	fig|634503.5.peg.2248	fig|667121.3.peg.388	fig|500638.4.peg.1281	fig|636.4.peg.599
ETAE_2133	fliS	Unknown	flagellar protein	fig|718251.4.peg.1982	fig|667120.3.peg.3601	fig|67780.5.peg.1295	fig|634503.5.peg.2249	fig|667121.3.peg.387	fig|500638.4.peg.1282	fig|636.4.peg.598
ETAE_2140	fliE	Unknown	flagellar hook-basal body protein	fig|718251.4.peg.1988	fig|667120.3.peg.3596	fig|67780.5.peg.1298	fig|634503.5.peg.2252	fig|667121.3.peg.384	fig|500638.4.peg.1285	fig|636.4.peg.595
ETAE_2143	fliG	Cytoplasmic	flagellar motor switch protein	fig|718251.4.peg.1991	fig|667120.3.peg.3594	fig|67780.5.peg.1301	fig|634503.5.peg.2255	fig|667121.3.peg.382	fig|500638.4.peg.1287	fig|636.4.peg.593
ETAE_2145	fliI	Cytoplasmic	flagellum-specific ATP synthase	fig|718251.4.peg.1993	fig|667120.3.peg.3592	fig|67780.5.peg.1303	fig|634503.5.peg.2257	fig|667121.3.peg.380	fig|500638.4.peg.1289	fig|636.4.peg.591
ETAE_2146	fliJ	Unknown	flagellar biosynthesis chaperone	fig|718251.4.peg.1994	fig|667120.3.peg.3591	fig|67780.5.peg.1304	fig|634503.5.peg.2258	fig|667121.3.peg.379	fig|500638.4.peg.1290	fig|636.4.peg.590
ETAE_2148	fliL	CytoplasmicMembrane	flagellar basal body-associated protein	fig|718251.4.peg.1996	fig|667120.3.peg.3589	fig|67780.5.peg.1306	fig|634503.5.peg.2260	fig|667121.3.peg.377	fig|500638.4.peg.1292	fig|636.4.peg.588
ETAE_2149	fliM	Unknown	flagellar motor switch protein	fig|718251.4.peg.1997	fig|667120.3.peg.3588	fig|67780.5.peg.1307	fig|634503.5.peg.2261	fig|667121.3.peg.376	fig|500638.4.peg.1293	fig|636.4.peg.587
ETAE_2150	fliN	Cytoplasmic	flagellar motor switch/type III secretory pathway protein	fig|718251.4.peg.1998	fig|667120.3.peg.3587	fig|67780.5.peg.1308	fig|634503.5.peg.2262	fig|667121.3.peg.375	fig|500638.4.peg.1294	fig|636.4.peg.586
ETAE_2152	fliP	CytoplasmicMembrane	flagellar biosynthesis pathway, component	fig|718251.4.peg.2000	fig|667120.3.peg.3585	fig|67780.5.peg.1310	fig|634503.5.peg.2264	fig|667121.3.peg.373	fig|500638.4.peg.1296	fig|636.4.peg.584
ETAE_2153	fliQ	Unknown	flagellar biosynthesis pathway, component	fig|718251.4.peg.2001	fig|667120.3.peg.3584	fig|67780.5.peg.1311	fig|634503.5.peg.2265	fig|667121.3.peg.372	fig|500638.4.peg.1297	fig|636.4.peg.583
ETAE_2154	fliR	CytoplasmicMembrane	flagellar biosynthesis pathway, component	fig|718251.4.peg.2002	fig|667120.3.peg.3583	fig|67780.5.peg.1312	fig|634503.5.peg.2266	fig|667121.3.peg.371	fig|500638.4.peg.1298	fig|636.4.peg.582
ETAE_2155		Cytoplasmic	metallo-beta-lactamase superfamily protein	fig|718251.4.peg.2003	fig|667120.3.peg.3582	fig|67780.5.peg.1313	fig|634503.5.peg.2267	fig|667121.3.peg.370	fig|500638.4.peg.1299	fig|636.4.peg.581
ETAE_2156		Unknown	hypothetical protein	fig|718251.4.peg.2004	fig|667120.3.peg.3581	fig|67780.5.peg.1314	fig|634503.5.peg.2268	fig|667121.3.peg.369	fig|500638.4.peg.1300	fig|636.4.peg.580
ETAE_2157		Unknown	hypothetical protein	fig|718251.4.peg.2005	fig|667120.3.peg.3580	fig|67780.5.peg.1315	fig|634503.5.peg.2269	fig|667121.3.peg.368	fig|500638.4.peg.1301	fig|636.4.peg.579
ETAE_2159	mukE	Cytoplasmic	condesin subunit E	fig|718251.4.peg.2007	fig|667120.3.peg.3578	fig|67780.5.peg.1317	fig|634503.5.peg.2271	fig|667121.3.peg.366	fig|500638.4.peg.1309	fig|636.4.peg.577
ETAE_2161	smtA	Unknown	putative metallothionein	fig|718251.4.peg.2009	fig|667120.3.peg.3576	fig|67780.5.peg.1319	fig|634503.5.peg.2273	fig|667121.3.peg.1537	fig|500638.4.peg.1311	fig|636.4.peg.575
ETAE_2162		Unknown	hypothetical protein	fig|718251.4.peg.2010	fig|667120.3.peg.3575	fig|67780.5.peg.1320	fig|634503.5.peg.2274	fig|667121.3.peg.1536	fig|500638.4.peg.1312	fig|636.4.peg.574
ETAE_2164		Unknown	hypothetical protein	fig|718251.4.peg.2012	fig|667120.3.peg.3573	fig|67780.5.peg.1322	fig|634503.5.peg.2276	fig|667121.3.peg.1534	fig|500638.4.peg.1313	fig|636.4.peg.572
ETAE_2165	ygfU	CytoplasmicMembrane	putative purine permease	fig|718251.4.peg.2013	fig|667120.3.peg.3572	fig|67780.5.peg.1323	fig|634503.5.peg.2277	fig|667121.3.peg.1533	fig|500638.4.peg.1314	fig|636.4.peg.571
ETAE_2166		Unknown	hypothetical protein	fig|718251.4.peg.2014	fig|667120.3.peg.3570	fig|67780.5.peg.1325	fig|634503.5.peg.2279	fig|667121.3.peg.1532	fig|500638.4.peg.1315	fig|636.4.peg.570
ETAE_2167	kdsB	Cytoplasmic	3-deoxy-manno-octulosonate cytidylyltransferase	fig|718251.4.peg.2015	fig|667120.3.peg.3569	fig|67780.5.peg.1326	fig|634503.5.peg.2280	fig|667121.3.peg.1531	fig|500638.4.peg.1316	fig|636.4.peg.569
ETAE_2168		Cytoplasmic	hypothetical protein	fig|718251.4.peg.2016	fig|667120.3.peg.3568	fig|67780.5.peg.1327	fig|634503.5.peg.2281	fig|667121.3.peg.1530	fig|500638.4.peg.1317	fig|636.4.peg.568
ETAE_2169	cspB	Unknown	cold shock-like protein	fig|718251.4.peg.2017	fig|667120.3.peg.3567	fig|67780.5.peg.1328	fig|634503.5.peg.2282	fig|667121.3.peg.1529	fig|500638.4.peg.1318	fig|636.4.peg.567
ETAE_2170	cspG	Cytoplasmic	old-shock domain family protein	fig|718251.4.peg.2018	fig|667120.3.peg.3566	fig|67780.5.peg.1329	fig|634503.5.peg.2283	fig|667121.3.peg.1528	fig|500638.4.peg.1319	fig|636.4.peg.566
ETAE_2171	lpxK	Unknown	tetraacyldisaccharide 4'-kinase	fig|718251.4.peg.2019	fig|667120.3.peg.3565	fig|67780.5.peg.1330	fig|634503.5.peg.2284	fig|667121.3.peg.1527	fig|500638.4.peg.1320	fig|636.4.peg.565
ETAE_2172	msbA	CytoplasmicMembrane	lipid transporter ATP-binding/permease protein	fig|718251.4.peg.2020	fig|667120.3.peg.3564	fig|67780.5.peg.1331	fig|634503.5.peg.2285	fig|667121.3.peg.1526	fig|500638.4.peg.1321	fig|636.4.peg.564
ETAE_2174		Cytoplasmic	integration host factor, beta subunit	fig|718251.4.peg.2022	fig|667120.3.peg.3562	fig|67780.5.peg.1333	fig|634503.5.peg.2287	fig|667121.3.peg.267	fig|500638.4.peg.1323	fig|636.4.peg.561
ETAE_2175	rpsA	Cytoplasmic	30S ribosomal protein S1	fig|718251.4.peg.2023	fig|667120.3.peg.3561	fig|67780.5.peg.1334	fig|634503.5.peg.2288	fig|667121.3.peg.266	fig|500638.4.peg.1324	fig|636.4.peg.560
ETAE_2176	cmk	Cytoplasmic	cytidylate kinase	fig|718251.4.peg.2024	fig|667120.3.peg.3560	fig|67780.5.peg.1335	fig|634503.5.peg.2289	fig|667121.3.peg.265	fig|500638.4.peg.1325	fig|636.4.peg.559
ETAE_2177	aroA	Unknown	3-phosphoshikimate 1-carboxyvinyltransferase	fig|718251.4.peg.2025	fig|667120.3.peg.3559	fig|67780.5.peg.1336	fig|634503.5.peg.2290	fig|667121.3.peg.264	fig|500638.4.peg.1326	fig|636.4.peg.557
ETAE_2178	serC	Cytoplasmic	phosphoserine aminotransferase	fig|718251.4.peg.2026	fig|667120.3.peg.3556	fig|67780.5.peg.1340	fig|634503.5.peg.2294	fig|667121.3.peg.263	fig|500638.4.peg.1327	fig|636.4.peg.556
ETAE_2179	ansB	Periplasmic	L-asparaginase II	fig|718251.4.peg.2027	fig|667120.3.peg.3555	fig|67780.5.peg.1341	fig|634503.5.peg.2295	fig|667121.3.peg.262	fig|500638.4.peg.1328	fig|636.4.peg.555
ETAE_2180		Cytoplasmic	hypothetical protein	fig|718251.4.peg.2028	fig|667120.3.peg.3554	fig|67780.5.peg.1342	fig|634503.5.peg.2296	fig|667121.3.peg.261	fig|500638.4.peg.1329	fig|636.4.peg.554
ETAE_2181	focA	CytoplasmicMembrane	formate transporter	fig|718251.4.peg.2029	fig|667120.3.peg.3552	fig|67780.5.peg.1343	fig|634503.5.peg.2297	fig|667121.3.peg.260	fig|500638.4.peg.1330	fig|636.4.peg.553
ETAE_2191	dmsD	Unknown	putative twin-argninine leader-binding protein	fig|718251.4.peg.2040	fig|667120.3.peg.3540	fig|67780.5.peg.1354	fig|634503.5.peg.2308	fig|667121.3.peg.249	fig|500638.4.peg.1341	fig|636.4.peg.542
ETAE_2192	dmsC	CytoplasmicMembrane	DMSO reductase anchor subunit	fig|718251.4.peg.2041	fig|667120.3.peg.3539	fig|67780.5.peg.1355	fig|634503.5.peg.2310	fig|667121.3.peg.248	fig|500638.4.peg.1342	fig|636.4.peg.541
ETAE_2194	dmsA	Periplasmic	anaerobic dimethyl sulfoxide reductase, subunit A	fig|718251.4.peg.2044	fig|667120.3.peg.3537	fig|67780.5.peg.1357	fig|634503.5.peg.2312	fig|667121.3.peg.246	fig|500638.4.peg.1345	fig|636.4.peg.539
ETAE_2196	serS	Cytoplasmic	seryl-tRNA synthetase	fig|718251.4.peg.2046	fig|667120.3.peg.3536	fig|67780.5.peg.1	fig|634503.5.peg.2316	fig|667121.3.peg.245	fig|500638.4.peg.1346	fig|636.4.peg.538
ETAE_2197	ycaJ	Unknown	putative ATPase	fig|718251.4.peg.2047	fig|667120.3.peg.3535	fig|67780.5.peg.2	fig|634503.5.peg.2317	fig|667121.3.peg.244	fig|500638.4.peg.1347	fig|636.4.peg.537
ETAE_2198	lolA	Periplasmic	outer membrane lipoprotein-sorting protein	fig|718251.4.peg.2048	fig|667120.3.peg.3534	fig|67780.5.peg.3	fig|634503.5.peg.2318	fig|667121.3.peg.243	fig|500638.4.peg.1348	fig|636.4.peg.536
ETAE_2200		Unknown	transcriptional regulator, AsnC family	fig|718251.4.peg.2050	fig|667120.3.peg.3532	fig|67780.5.peg.5	fig|634503.5.peg.2320	fig|667121.3.peg.240	fig|500638.4.peg.1350	fig|636.4.peg.534
ETAE_2202	trxB	Unknown	thioredoxin reductase (NADPH)	fig|718251.4.peg.2051	fig|667120.3.peg.3529	fig|67780.5.peg.6	fig|634503.5.peg.2321	fig|667121.3.peg.239	fig|500638.4.peg.1351	fig|636.4.peg.533
ETAE_2203	cydD	CytoplasmicMembrane	cysteine/glutathione ABC transporter	fig|718251.4.peg.2052	fig|667120.3.peg.3528	fig|67780.5.peg.7	fig|634503.5.peg.2322	fig|667121.3.peg.238	fig|500638.4.peg.1352	fig|636.4.peg.532
ETAE_2204	cydC	CytoplasmicMembrane	cysteine/glutathione ABC transporter	fig|718251.4.peg.2053	fig|667120.3.peg.3527	fig|67780.5.peg.8	fig|634503.5.peg.2323	fig|667121.3.peg.237	fig|500638.4.peg.1353	fig|636.4.peg.531
ETAE_2205	aat	Unknown	Leu/Phe-tRNA-protein transferase	fig|718251.4.peg.2054	fig|667120.3.peg.3526	fig|67780.5.peg.9	fig|634503.5.peg.2324	fig|667121.3.peg.236	fig|500638.4.peg.1354	fig|636.4.peg.530
ETAE_2206	infA	Cytoplasmic	translation initiation factor IF-1	fig|718251.4.peg.2055	fig|667120.3.peg.3525	fig|67780.5.peg.10	fig|634503.5.peg.2325	fig|667121.3.peg.235	fig|500638.4.peg.1355	fig|636.4.peg.529
ETAE_2207	clpA	Cytoplasmic	ATP-dependent Clp protease ATP-binding subunit	fig|718251.4.peg.2056	fig|667120.3.peg.3524	fig|67780.5.peg.11	fig|634503.5.peg.2326	fig|667121.3.peg.234	fig|500638.4.peg.1356	fig|636.4.peg.528
ETAE_2208	clpS	Unknown	ATP-dependent Clp protease adaptor protein	fig|718251.4.peg.2057	fig|667120.3.peg.3523	fig|67780.5.peg.12	fig|634503.5.peg.2327	fig|667121.3.peg.233	fig|500638.4.peg.1357	fig|636.4.peg.527
ETAE_2209	cspD	Cytoplasmic	cold shock protein	fig|718251.4.peg.2058	fig|667120.3.peg.3522	fig|67780.5.peg.13	fig|634503.5.peg.2328	fig|667121.3.peg.232	fig|500638.4.peg.1358	fig|636.4.peg.526
ETAE_2214		CytoplasmicMembrane	hypothetical protein	fig|718251.4.peg.2063	fig|667120.3.peg.3517	fig|67780.5.peg.17	fig|634503.5.peg.2333	fig|667121.3.peg.228	fig|500638.4.peg.1362	fig|636.4.peg.522
ETAE_2215		Cytoplasmic	hydroxylamine reductase	fig|718251.4.peg.2064	fig|667120.3.peg.3516	fig|67780.5.peg.2942	fig|634503.5.peg.2334	fig|667121.3.peg.227	fig|500638.4.peg.1363	fig|636.4.peg.521
ETAE_2216		Cytoplasmic	HCP oxidoreductase, NADH-dependent	fig|718251.4.peg.2065	fig|667120.3.peg.3515	fig|67780.5.peg.2941	fig|634503.5.peg.2335	fig|667121.3.peg.226	fig|500638.4.peg.1364	fig|636.4.peg.520
ETAE_2221	ltaA	Cytoplasmic	L-allo-threonine aldolase, PLP-dependent	fig|718251.4.peg.2070	fig|667120.3.peg.3510	fig|67780.5.peg.2936	fig|634503.5.peg.2340	fig|667121.3.peg.2715	fig|500638.4.peg.1372	fig|636.4.peg.511
ETAE_2222		CytoplasmicMembrane	NAD-dependent epimerase/dehydratase	fig|718251.4.peg.2071	fig|667120.3.peg.3509	fig|67780.5.peg.2935	fig|634503.5.peg.2341	fig|667121.3.peg.2716	fig|500638.4.peg.1373	fig|636.4.peg.510
ETAE_2223		Unknown	NAD-dependent epimerase/dehydratase	fig|718251.4.peg.2072	fig|667120.3.peg.3508	fig|67780.5.peg.2931	fig|634503.5.peg.2345	fig|667121.3.peg.2717	fig|500638.4.peg.1374	fig|636.4.peg.506
ETAE_2227		Periplasmic	hypothetical protein	fig|718251.4.peg.2076	fig|667120.3.peg.3504	fig|67780.5.peg.2927	fig|634503.5.peg.2349	fig|667121.3.peg.2721	fig|500638.4.peg.1378	fig|636.4.peg.501
ETAE_2228	yehB	OuterMembrane	putative outer membrane protein	fig|718251.4.peg.2077	fig|667120.3.peg.3503	fig|67780.5.peg.2926	fig|634503.5.peg.2350	fig|667121.3.peg.2722	fig|500638.4.peg.1379	fig|636.4.peg.500
ETAE_2230	artP	CytoplasmicMembrane	arginine transport system ATP-binding protein	fig|718251.4.peg.2079	fig|667120.3.peg.3501	fig|67780.5.peg.2924	fig|634503.5.peg.2352	fig|667121.3.peg.2724	fig|500638.4.peg.1381	fig|636.4.peg.498
ETAE_2231	artI	Periplasmic	arginine transport system substrate-binding protein	fig|718251.4.peg.2080	fig|667120.3.peg.3500	fig|67780.5.peg.2923	fig|634503.5.peg.2353	fig|667121.3.peg.2725	fig|500638.4.peg.1382	fig|636.4.peg.497
ETAE_2232	artQ	CytoplasmicMembrane	arginine transport system permease protein	fig|718251.4.peg.2081	fig|667120.3.peg.3499	fig|67780.5.peg.2922	fig|634503.5.peg.2354	fig|667121.3.peg.2726	fig|500638.4.peg.1383	fig|636.4.peg.496
ETAE_2233	artM	CytoplasmicMembrane	arginine transport system permease protein	fig|718251.4.peg.2082	fig|667120.3.peg.3498	fig|67780.5.peg.2921	fig|634503.5.peg.2355	fig|667121.3.peg.2727	fig|500638.4.peg.1384	fig|636.4.peg.495
ETAE_2234	artJ	Periplasmic	arginine transport system substrate-binding protein	fig|718251.4.peg.2083	fig|667120.3.peg.3497	fig|67780.5.peg.2920	fig|634503.5.peg.2356	fig|667121.3.peg.2728	fig|500638.4.peg.1385	fig|636.4.peg.494
ETAE_2235		Unknown	methylated-DNA-protein-cysteine methyltransferase	fig|718251.4.peg.2084	fig|667120.3.peg.3496	fig|67780.5.peg.2919	fig|634503.5.peg.2357	fig|667121.3.peg.2729	fig|500638.4.peg.1386	fig|636.4.peg.493
ETAE_2236	rumB	Unknown	23S rRNA metyluridine methyltransferase	fig|718251.4.peg.2085	fig|667120.3.peg.3495	fig|67780.5.peg.2918	fig|634503.5.peg.2358	fig|667121.3.peg.2730	fig|500638.4.peg.1387	fig|636.4.peg.492
ETAE_2238		Unknown	hypothetical protein	fig|718251.4.peg.2087	fig|667120.3.peg.3493	fig|67780.5.peg.2916	fig|634503.5.peg.2360	fig|667121.3.peg.2732	fig|500638.4.peg.1389	fig|636.4.peg.490
ETAE_2240	nfsA	Cytoplasmic	nitroreductase A	fig|718251.4.peg.2089	fig|667120.3.peg.3491	fig|67780.5.peg.2915	fig|634503.5.peg.2361	fig|667121.3.peg.2734	fig|500638.4.peg.1390	fig|636.4.peg.488
ETAE_2260		CytoplasmicMembrane	undecaprenyl-diphosphatase	fig|718251.4.peg.2103	fig|667120.3.peg.3471	fig|67780.5.peg.2905	fig|634503.5.peg.2372	fig|667121.3.peg.708	fig|500638.4.peg.1489	fig|636.4.peg.478
ETAE_2261	deoR	Cytoplasmic	DNA-binding transcriptional repressor	fig|718251.4.peg.2104	fig|667120.3.peg.3470	fig|67780.5.peg.2904	fig|634503.5.peg.2373	fig|667121.3.peg.707	fig|500638.4.peg.1490	fig|636.4.peg.477
ETAE_2263	sdaC	CytoplasmicMembrane	probable serine transporter	fig|718251.4.peg.2106	fig|667120.3.peg.3468	fig|67780.5.peg.2903	fig|634503.5.peg.2374	fig|667121.3.peg.706	fig|500638.4.peg.1491	fig|636.4.peg.476
ETAE_2266	dacC	CytoplasmicMembrane	D-alanyl-D-alanine carboxypeptidase	fig|718251.4.peg.2108	fig|667120.3.peg.3466	fig|67780.5.peg.2901	fig|634503.5.peg.2376	fig|667121.3.peg.1213	fig|500638.4.peg.1493	fig|636.4.peg.474
ETAE_2267	ybcL	Periplasmic	DLP12 prophage; predicted kinase inhibitor	fig|718251.4.peg.2109	fig|667120.3.peg.3464	fig|67780.5.peg.2900	fig|634503.5.peg.2377	fig|667121.3.peg.1214	fig|500638.4.peg.1494	fig|636.4.peg.472
ETAE_2268		Unknown	transcriptional regulator, AraC family	fig|718251.4.peg.2110	fig|667120.3.peg.3463	fig|67780.5.peg.2899	fig|634503.5.peg.2378	fig|667121.3.peg.1215	fig|500638.4.peg.1495	fig|636.4.peg.471
ETAE_2270		Cytoplasmic	Fe-S oxidoreductase	fig|718251.4.peg.2112	fig|667120.3.peg.1476	fig|67780.5.peg.2887	fig|634503.5.peg.2391	fig|667121.3.peg.1216	fig|500638.4.peg.1496	fig|636.4.peg.470
ETAE_2271		Unknown	NAD-dependent epimerase/dehydratase	fig|718251.4.peg.2113	fig|667120.3.peg.1477	fig|67780.5.peg.2885	fig|634503.5.peg.2393	fig|667121.3.peg.1217	fig|500638.4.peg.1497	fig|636.4.peg.469
ETAE_2275	hisG	Cytoplasmic	ATP phosphoribosyltransferase	fig|718251.4.peg.2115	fig|667120.3.peg.1482	fig|67780.5.peg.2883	fig|634503.5.peg.2395	fig|667121.3.peg.1219	fig|500638.4.peg.1499	fig|636.4.peg.467
ETAE_2276	hisD	Unknown	histidinol dehydrogenase	fig|718251.4.peg.2116	fig|667120.3.peg.1483	fig|67780.5.peg.2882	fig|634503.5.peg.2396	fig|667121.3.peg.1220	fig|500638.4.peg.1500	fig|636.4.peg.466
ETAE_2277	hisC	Cytoplasmic	histidinol-phosphate aminotransferase	fig|718251.4.peg.2117	fig|667120.3.peg.1484	fig|67780.5.peg.2881	fig|634503.5.peg.2397	fig|667121.3.peg.1221	fig|500638.4.peg.1501	fig|636.4.peg.465
ETAE_2278	hisB	Cytoplasmic	imidazoleglycerol-phosphate dehydratase	fig|718251.4.peg.2118	fig|667120.3.peg.1485	fig|67780.5.peg.2880	fig|634503.5.peg.2398	fig|667121.3.peg.1222	fig|500638.4.peg.1502	fig|636.4.peg.464
ETAE_2279	hisH	Unknown	imidazole glycerol phosphate synthase subunit	fig|718251.4.peg.2119	fig|667120.3.peg.1486	fig|67780.5.peg.2879	fig|634503.5.peg.2399	fig|667121.3.peg.1223	fig|500638.4.peg.1503	fig|636.4.peg.463
ETAE_2280	hisA	Cytoplasmic	N-(5'-phospho-L-ribosyl-formimino)-5-amino-1-(5'- phosphoribosyl)-4-imidazolecarboxamide isomerase	fig|718251.4.peg.2120	fig|667120.3.peg.1487	fig|67780.5.peg.2878	fig|634503.5.peg.2400	fig|667121.3.peg.1224	fig|500638.4.peg.1504	fig|636.4.peg.462
ETAE_2281	hisF	Cytoplasmic	imidazole glycerol phosphate synthase subunit	fig|718251.4.peg.2121	fig|667120.3.peg.1488	fig|67780.5.peg.2877	fig|634503.5.peg.2401	fig|667121.3.peg.1225	fig|500638.4.peg.1505	fig|636.4.peg.461
ETAE_2282	hisIE	Cytoplasmic	phosphoribosyl-ATP pyrophosphohydrolase / phosphoribosyl-AMP cyclohydrolase	fig|718251.4.peg.2122	fig|667120.3.peg.1489	fig|67780.5.peg.2876	fig|634503.5.peg.2402	fig|667121.3.peg.1226	fig|500638.4.peg.1506	fig|636.4.peg.460
ETAE_2283	torY	CytoplasmicMembrane	trimethylamine-N-oxide reductase (cytochrome c) 2, cytochrome c-type subunit TorY	fig|718251.4.peg.2123	fig|667120.3.peg.1490	fig|67780.5.peg.2875	fig|634503.5.peg.2403	fig|667121.3.peg.1227	fig|500638.4.peg.1507	fig|636.4.peg.459
ETAE_2284	torZ	Periplasmic	trimethylamine-N-oxide reductase (cytochrome c) 2	fig|718251.4.peg.2124	fig|667120.3.peg.1491	fig|67780.5.peg.2874	fig|634503.5.peg.2404	fig|667121.3.peg.1228	fig|500638.4.peg.1508	fig|636.4.peg.458
ETAE_2285		CytoplasmicMembrane	sugar efflux transporter	fig|718251.4.peg.2125	fig|667120.3.peg.1492	fig|67780.5.peg.2873	fig|634503.5.peg.2405	fig|667121.3.peg.1229	fig|500638.4.peg.1509	fig|636.4.peg.457
ETAE_2286		Unknown	hypothetical protein	fig|718251.4.peg.2126	fig|667120.3.peg.1493	fig|67780.5.peg.2872	fig|634503.5.peg.2406	fig|667121.3.peg.1230	fig|500638.4.peg.1510	fig|636.4.peg.456
ETAE_2287		CytoplasmicMembrane	tryptophan-specific transport protein	fig|718251.4.peg.2127	fig|667120.3.peg.1494	fig|67780.5.peg.2871	fig|634503.5.peg.2407	fig|667121.3.peg.1231	fig|500638.4.peg.1511	fig|636.4.peg.455
ETAE_2288		Cytoplasmic	elongation factor P	fig|718251.4.peg.2128	fig|667120.3.peg.1495	fig|67780.5.peg.2870	fig|634503.5.peg.2408	fig|667121.3.peg.1232	fig|500638.4.peg.1512	fig|636.4.peg.454
ETAE_2289	uxuA	Cytoplasmic	mannonate dehydratase	fig|718251.4.peg.2129	fig|667120.3.peg.1496	fig|67780.5.peg.2869	fig|634503.5.peg.2409	fig|667121.3.peg.1233	fig|500638.4.peg.1513	fig|636.4.peg.453
ETAE_2294		CytoplasmicMembrane	hypothetical protein	fig|718251.4.peg.2132	fig|667120.3.peg.1499	fig|67780.5.peg.2866	fig|634503.5.peg.2413	fig|667121.3.peg.828	fig|500638.4.peg.1516	fig|636.4.peg.450
ETAE_2295		Cytoplasmic	transcriptional regulators	fig|718251.4.peg.2133	fig|667120.3.peg.1500	fig|67780.5.peg.2865	fig|634503.5.peg.2414	fig|667121.3.peg.827	fig|500638.4.peg.1517	fig|636.4.peg.449
ETAE_2297		Unknown	putative cobalamin synthesis protein	fig|718251.4.peg.2135	fig|667120.3.peg.1502	fig|67780.5.peg.2862	fig|634503.5.peg.2417	fig|667121.3.peg.825	fig|500638.4.peg.1519	fig|636.4.peg.447
ETAE_2298		Unknown	NLP/P60 protein	fig|718251.4.peg.2136	fig|667120.3.peg.1503	fig|67780.5.peg.2861	fig|634503.5.peg.2418	fig|667121.3.peg.823	fig|500638.4.peg.1520	fig|636.4.peg.445
ETAE_2300	cycA	CytoplasmicMembrane	D-alanine/D-serine/glycine permease	fig|718251.4.peg.2138	fig|667120.3.peg.1504	fig|67780.5.peg.2860	fig|634503.5.peg.2419	fig|667121.3.peg.822	fig|500638.4.peg.1521	fig|636.4.peg.444
ETAE_2303	fruB	Cytoplasmic	fructose-specific PTS IIA/HPr components	fig|718251.4.peg.2141	fig|667120.3.peg.1507	fig|67780.5.peg.2857	fig|634503.5.peg.2422	fig|667121.3.peg.819	fig|500638.4.peg.1524	fig|636.4.peg.441
ETAE_2304		Unknown	ADP-ribose pyrophosphatase	fig|718251.4.peg.2142	fig|667120.3.peg.1508	fig|67780.5.peg.2856	fig|634503.5.peg.2423	fig|667121.3.peg.818	fig|500638.4.peg.1525	fig|636.4.peg.440
ETAE_2307	glnH	Periplasmic	glutamine ABC transporter periplasmic protein	fig|718251.4.peg.2143	fig|667120.3.peg.1510	fig|67780.5.peg.2855	fig|634503.5.peg.2424	fig|667121.3.peg.817	fig|500638.4.peg.1526	fig|636.4.peg.439
ETAE_2308	glnP	CytoplasmicMembrane	glutamine ABC transporter permease component	fig|718251.4.peg.2144	fig|667120.3.peg.1511	fig|67780.5.peg.2854	fig|634503.5.peg.2425	fig|667121.3.peg.816	fig|500638.4.peg.1527	fig|636.4.peg.438
ETAE_2309	glnQ	Cytoplasmic	glutamine ABC transporter ATP-binding component	fig|718251.4.peg.2145	fig|667120.3.peg.1512	fig|67780.5.peg.2853	fig|634503.5.peg.2426	fig|667121.3.peg.815	fig|500638.4.peg.1528	fig|636.4.peg.437
ETAE_2313	rsuA	Unknown	16S rRNA uridine-516 pseudouridylate synthase and related pseudouridylate synthases	fig|718251.4.peg.2149	fig|667120.3.peg.1518	fig|67780.5.peg.2846	fig|634503.5.peg.2433	fig|667121.3.peg.3129	fig|500638.4.peg.1533	fig|636.4.peg.432
ETAE_2314		Unknown	hypothetical protein	fig|718251.4.peg.2150	fig|667120.3.peg.1519	fig|67780.5.peg.2845	fig|634503.5.peg.2434	fig|667121.3.peg.3130	fig|500638.4.peg.1534	fig|636.4.peg.431
ETAE_2315		Cytoplasmic	DNA or RNA helicases of superfamily II	fig|718251.4.peg.2151	fig|667120.3.peg.1520	fig|67780.5.peg.2844	fig|634503.5.peg.2435	fig|667121.3.peg.3131	fig|500638.4.peg.1535	fig|636.4.peg.430
ETAE_2316	rplY	Unknown	50S ribosomal protein L25	fig|718251.4.peg.2152	fig|667120.3.peg.1521	fig|67780.5.peg.2843	fig|634503.5.peg.2437	fig|667121.3.peg.3132	fig|500638.4.peg.1536	fig|636.4.peg.429
ETAE_2317	ndpA	Cytoplasmic	nucleoid-associated protein	fig|718251.4.peg.2153	fig|667120.3.peg.1522	fig|67780.5.peg.1870	fig|634503.5.peg.2438	fig|667121.3.peg.3133	fig|500638.4.peg.1537	fig|636.4.peg.428
ETAE_2318		Unknown	hypothetical protein	fig|718251.4.peg.2154	fig|667120.3.peg.1523	fig|67780.5.peg.1871	fig|634503.5.peg.2439	fig|667121.3.peg.3134	fig|500638.4.peg.1538	fig|636.4.peg.427
ETAE_2348		Cytoplasmic	hypothetical protein	fig|718251.4.peg.2184	fig|667120.3.peg.1553	fig|67780.5.peg.1905	fig|634503.5.peg.2472	fig|667121.3.peg.2031	fig|500638.4.peg.1582	fig|636.4.peg.396
ETAE_2349		Cytoplasmic	competence damage-inducible protein A	fig|718251.4.peg.2185	fig|667120.3.peg.1554	fig|67780.5.peg.1906	fig|634503.5.peg.2473	fig|667121.3.peg.2032	fig|500638.4.peg.1583	fig|636.4.peg.395
ETAE_2350	tyrP	CytoplasmicMembrane	tyrosine-specific transport protein	fig|718251.4.peg.2186	fig|667120.3.peg.1555	fig|67780.5.peg.1907	fig|634503.5.peg.2474	fig|667121.3.peg.2033	fig|500638.4.peg.1584	fig|636.4.peg.394
ETAE_2351	trpS	Cytoplasmic	tryptophanyl-tRNA synthetase	fig|718251.4.peg.2187	fig|667120.3.peg.1556	fig|67780.5.peg.1908	fig|634503.5.peg.2475	fig|667121.3.peg.2034	fig|500638.4.peg.1585	fig|636.4.peg.393
ETAE_2352		Unknown	hypothetical protein	fig|718251.4.peg.2188	fig|667120.3.peg.1557	fig|67780.5.peg.1909	fig|634503.5.peg.2476	fig|667121.3.peg.2035	fig|500638.4.peg.1586	fig|636.4.peg.392
ETAE_2354	menE	Cytoplasmic	O-succinylbenzoic acid--CoA ligase	fig|718251.4.peg.2190	fig|667120.3.peg.1559	fig|67780.5.peg.1910	fig|634503.5.peg.2477	fig|667121.3.peg.2036	fig|500638.4.peg.1587	fig|636.4.peg.391
ETAE_2356	menB	Unknown	naphthoate synthase	fig|718251.4.peg.2192	fig|667120.3.peg.1561	fig|67780.5.peg.1912	fig|634503.5.peg.2479	fig|667121.3.peg.2038	fig|500638.4.peg.1590	fig|636.4.peg.389
ETAE_2357	menH	Unknown	2-succinyl-6-hydroxy-2,4-cyclohexadiene-1-carboxylate synthase	fig|718251.4.peg.2193	fig|667120.3.peg.1562	fig|67780.5.peg.1913	fig|634503.5.peg.2480	fig|667121.3.peg.2039	fig|500638.4.peg.1591	fig|636.4.peg.388
ETAE_2358	menD	Unknown	2-succinyl-6-hydroxy-2,4-cyclohexadiene-1-carboxylate synthase	fig|718251.4.peg.2194	fig|667120.3.peg.1563	fig|67780.5.peg.1914	fig|634503.5.peg.2481	fig|667121.3.peg.2040	fig|500638.4.peg.1592	fig|636.4.peg.387
ETAE_2359	menF	Cytoplasmic	isochorismate synthase	fig|718251.4.peg.2195	fig|667120.3.peg.1564	fig|67780.5.peg.1915	fig|634503.5.peg.2483	fig|667121.3.peg.2041	fig|500638.4.peg.1593	fig|636.4.peg.386
ETAE_2360		CytoplasmicMembrane	hypothetical protein	fig|718251.4.peg.2196	fig|667120.3.peg.1565	fig|67780.5.peg.1916	fig|634503.5.peg.2484	fig|667121.3.peg.2042	fig|500638.4.peg.1594	fig|636.4.peg.385
ETAE_2362		Unknown	hydrogenase 2-specific chaperone	fig|718251.4.peg.2198	fig|667120.3.peg.1567	fig|67780.5.peg.1918	fig|634503.5.peg.2488	fig|667121.3.peg.2044	fig|500638.4.peg.1596	fig|636.4.peg.383
ETAE_2363	hybD	Cytoplasmic	predicted maturation element for hydrogenase 2	fig|718251.4.peg.2199	fig|667120.3.peg.1568	fig|67780.5.peg.1919	fig|634503.5.peg.2489	fig|667121.3.peg.2045	fig|500638.4.peg.1597	fig|636.4.peg.382
ETAE_2364	hybC	Periplasmic	hydrogenase 2 large subunit	fig|718251.4.peg.2200	fig|667120.3.peg.1569	fig|67780.5.peg.1920	fig|634503.5.peg.2490	fig|667121.3.peg.2046	fig|500638.4.peg.1598	fig|636.4.peg.381
ETAE_2365		CytoplasmicMembrane	predicted hydrogenase 2 cytochrome b type component	fig|718251.4.peg.2201	fig|667120.3.peg.1570	fig|67780.5.peg.1921	fig|634503.5.peg.2491	fig|667121.3.peg.2047	fig|500638.4.peg.1599	fig|636.4.peg.380
ETAE_2366	hybA	Periplasmic	hydrogenase 2 protein	fig|718251.4.peg.2202	fig|667120.3.peg.1571	fig|67780.5.peg.1922	fig|634503.5.peg.2492	fig|667121.3.peg.2048	fig|500638.4.peg.1600	fig|636.4.peg.379
ETAE_2367	hyb0	Periplasmic	hydrogenase 2 small subunit	fig|718251.4.peg.2203	fig|667120.3.peg.1572	fig|67780.5.peg.1923	fig|634503.5.peg.2493	fig|667121.3.peg.2049	fig|500638.4.peg.1601	fig|636.4.peg.378
ETAE_2370		CytoplasmicMembrane	putative cytochrome	fig|718251.4.peg.2205	fig|667120.3.peg.1575	fig|67780.5.peg.1927	fig|634503.5.peg.2496	fig|667121.3.peg.2050	fig|500638.4.peg.1602	fig|636.4.peg.376
ETAE_2371	bglX	Periplasmic	beta-glucosidase-related glycosidases	fig|718251.4.peg.2206	fig|667120.3.peg.1576	fig|67780.5.peg.1928	fig|634503.5.peg.2497	fig|667121.3.peg.2051	fig|500638.4.peg.1603	fig|636.4.peg.375
ETAE_2372		Unknown	hypothetical protein	fig|718251.4.peg.2207	fig|667120.3.peg.1577	fig|67780.5.peg.1929	fig|634503.5.peg.2498	fig|667121.3.peg.2052	fig|500638.4.peg.1604	fig|636.4.peg.374
ETAE_2373	nuoN	CytoplasmicMembrane	NADH:ubiquinone oxidoreductase subunit 2 (chain N)	fig|718251.4.peg.2208	fig|667120.3.peg.1578	fig|67780.5.peg.1930	fig|634503.5.peg.2499	fig|667121.3.peg.2053	fig|500638.4.peg.1605	fig|636.4.peg.373
ETAE_2374	nuoM	CytoplasmicMembrane	NADH:ubiquinone oxidoreductase subunit 4 (chain M)	fig|718251.4.peg.2209	fig|667120.3.peg.1579	fig|67780.5.peg.1931	fig|634503.5.peg.2500	fig|667121.3.peg.2054	fig|500638.4.peg.1606	fig|636.4.peg.372
ETAE_2375	nuoL	CytoplasmicMembrane	NADH:ubiquinone oxidoreductase subunit 5 (chain L)/multisubunit Na+/H+ antiporter, MnhA subunit	fig|718251.4.peg.2210	fig|667120.3.peg.1580	fig|67780.5.peg.1932	fig|634503.5.peg.2501	fig|667121.3.peg.2055	fig|500638.4.peg.1607	fig|636.4.peg.371
ETAE_2376	nuoK	CytoplasmicMembrane	NADH:ubiquinone oxidoreductase subunit 11 or 4L (chain K)	fig|718251.4.peg.2211	fig|667120.3.peg.1581	fig|67780.5.peg.1933	fig|634503.5.peg.2502	fig|667121.3.peg.2056	fig|500638.4.peg.1608	fig|636.4.peg.370
ETAE_2377	nuoJ	CytoplasmicMembrane	NADH:ubiquinone oxidoreductase subunit 6 (chain J)	fig|718251.4.peg.2212	fig|667120.3.peg.1582	fig|67780.5.peg.1934	fig|634503.5.peg.2503	fig|667121.3.peg.2057	fig|500638.4.peg.1609	fig|636.4.peg.369
ETAE_2378	nuoI	Unknown	formate hydrogenlyase subunit 6/NADH:ubiquinone oxidoreductase 23 kD subunit (chain I)	fig|718251.4.peg.2213	fig|667120.3.peg.1583	fig|67780.5.peg.1935	fig|634503.5.peg.2504	fig|667121.3.peg.2058	fig|500638.4.peg.1610	fig|636.4.peg.368
ETAE_2379	nuoH	CytoplasmicMembrane	NADH:ubiquinone oxidoreductase subunit 1 (chain H)	fig|718251.4.peg.2214	fig|667120.3.peg.1584	fig|67780.5.peg.1936	fig|634503.5.peg.2505	fig|667121.3.peg.2059	fig|500638.4.peg.1611	fig|636.4.peg.367
ETAE_2380	nuoG	Unknown	NADH dehydrogenase/NADH:ubiquinone oxidoreductase 75 kD subunit (chain G)	fig|718251.4.peg.2215	fig|667120.3.peg.1585	fig|67780.5.peg.1937	fig|634503.5.peg.2506	fig|667121.3.peg.2060	fig|500638.4.peg.1612	fig|636.4.peg.366
ETAE_2381	nuoF	Cytoplasmic	NADH:ubiquinone oxidoreductase, NADH-binding (51 kD) subunit	fig|718251.4.peg.2216	fig|667120.3.peg.1586	fig|67780.5.peg.1938	fig|634503.5.peg.2507	fig|667121.3.peg.2061	fig|500638.4.peg.1613	fig|636.4.peg.365
ETAE_2382	nuoE	Cytoplasmic	NADH:ubiquinone oxidoreductase 24 kD subunit	fig|718251.4.peg.2217	fig|667120.3.peg.1587	fig|67780.5.peg.1939	fig|634503.5.peg.2508	fig|667121.3.peg.2062	fig|500638.4.peg.1614	fig|636.4.peg.364
ETAE_2383	nuoD	Cytoplasmic	NADH:ubiquinone oxidoreductase 49 kD subunit 7	fig|718251.4.peg.2218	fig|667120.3.peg.1588	fig|67780.5.peg.1940	fig|634503.5.peg.2509	fig|667121.3.peg.2063	fig|500638.4.peg.1615	fig|636.4.peg.363
ETAE_2384	nuoB	Unknown	NADH:ubiquinone oxidoreductase 20 kD subunit and related Fe-S oxidoreductases	fig|718251.4.peg.2219	fig|667120.3.peg.1589	fig|67780.5.peg.1941	fig|634503.5.peg.2510	fig|667121.3.peg.2064	fig|500638.4.peg.1616	fig|636.4.peg.362
ETAE_2385	nuoA	Unknown	NADH:ubiquinone oxidoreductase subunit 3 (chain A)	fig|718251.4.peg.2220	fig|667120.3.peg.1590	fig|67780.5.peg.1942	fig|634503.5.peg.2511	fig|667121.3.peg.2065	fig|500638.4.peg.1617	fig|636.4.peg.361
ETAE_2386		Cytoplasmic	transcriptional regulator, LysR family	fig|718251.4.peg.2221	fig|667120.3.peg.1591	fig|67780.5.peg.1943	fig|634503.5.peg.2512	fig|667121.3.peg.2067	fig|500638.4.peg.1619	fig|636.4.peg.360
ETAE_2388	ynjE	Unknown	thiosulfate sulfur transferase	fig|718251.4.peg.2223	fig|667120.3.peg.1593	fig|67780.5.peg.1945	fig|634503.5.peg.2515	fig|667121.3.peg.2069	fig|500638.4.peg.1621	fig|636.4.peg.358
ETAE_2389	ynjF	CytoplasmicMembrane	cytochrome oxidase	fig|718251.4.peg.2224	fig|667120.3.peg.1594	fig|67780.5.peg.1946	fig|634503.5.peg.2516	fig|667121.3.peg.2070	fig|500638.4.peg.1622	fig|636.4.peg.357
ETAE_2390		Unknown	hypothetical protein	fig|718251.4.peg.2225	fig|667120.3.peg.1595	fig|67780.5.peg.1947	fig|634503.5.peg.2517	fig|667121.3.peg.2071	fig|500638.4.peg.1623	fig|636.4.peg.356
ETAE_2391		Cytoplasmic	aminotransferase class I and II	fig|718251.4.peg.2226	fig|667120.3.peg.1596	fig|67780.5.peg.1948	fig|634503.5.peg.2518	fig|667121.3.peg.2072	fig|500638.4.peg.1624	fig|636.4.peg.355
ETAE_2392	yfbR	Unknown	5'-nucleotidase	fig|718251.4.peg.2227	fig|667120.3.peg.1597	fig|67780.5.peg.1949	fig|634503.5.peg.2519	fig|667121.3.peg.2073	fig|500638.4.peg.1625	fig|636.4.peg.354
ETAE_2393		CytoplasmicMembrane	ion transport protein	fig|718251.4.peg.2228	fig|667120.3.peg.1598	fig|67780.5.peg.1950	fig|634503.5.peg.2520	fig|667121.3.peg.2074	fig|500638.4.peg.1626	fig|636.4.peg.353
ETAE_2395		Cytoplasmic	hypothetical protein	fig|718251.4.peg.2230	fig|667120.3.peg.1602	fig|67780.5.peg.1952	fig|634503.5.peg.2522	fig|667121.3.peg.1068	fig|500638.4.peg.1628	fig|636.4.peg.351
ETAE_2396		Unknown	hypothetical protein	fig|718251.4.peg.2231	fig|667120.3.peg.1603	fig|67780.5.peg.1953	fig|634503.5.peg.2523	fig|667121.3.peg.1069	fig|500638.4.peg.1629	fig|636.4.peg.350
ETAE_2397	ackA	Cytoplasmic	acetate kinase	fig|718251.4.peg.2232	fig|667120.3.peg.1604	fig|67780.5.peg.1955	fig|634503.5.peg.2525	fig|667121.3.peg.1071	fig|500638.4.peg.1631	fig|636.4.peg.349
ETAE_2398	pta	Unknown	phosphotransacetylase	fig|718251.4.peg.2233	fig|667120.3.peg.1605	fig|67780.5.peg.1956	fig|634503.5.peg.2526	fig|667121.3.peg.1072	fig|500638.4.peg.1632	fig|636.4.peg.348
ETAE_2399		Unknown	rhodanese-like protein	fig|718251.4.peg.2234	fig|667120.3.peg.1607	fig|67780.5.peg.2836	fig|634503.5.peg.2534	fig|667121.3.peg.325	fig|500638.4.peg.1633	fig|636.4.peg.3310
ETAE_2401		Unknown	phosphodiesterase	fig|718251.4.peg.2236	fig|667120.3.peg.1609	fig|67780.5.peg.2834	fig|634503.5.peg.2536	fig|667121.3.peg.327	fig|500638.4.peg.1636	fig|636.4.peg.3308
ETAE_2402		Cytoplasmic	glutathione S-transferase	fig|718251.4.peg.2237	fig|667120.3.peg.1610	fig|67780.5.peg.2833	fig|634503.5.peg.2537	fig|667121.3.peg.328	fig|500638.4.peg.1637	fig|636.4.peg.3307
ETAE_2403		Unknown	glutathione S-transferase	fig|718251.4.peg.2238	fig|667120.3.peg.1611	fig|67780.5.peg.2832	fig|634503.5.peg.2538	fig|667121.3.peg.329	fig|500638.4.peg.1638	fig|636.4.peg.3306
ETAE_2404	folX	Cytoplasmic	D-erythro-7,8-dihydroneopterin tri P epimerase	fig|718251.4.peg.2239	fig|667120.3.peg.1612	fig|67780.5.peg.2831	fig|634503.5.peg.2539	fig|667121.3.peg.330	fig|500638.4.peg.1639	fig|636.4.peg.3305
ETAE_2405		Cytoplasmic	hypothetical protein	fig|718251.4.peg.2240	fig|667120.3.peg.1613	fig|67780.5.peg.2830	fig|634503.5.peg.2540	fig|667121.3.peg.331	fig|500638.4.peg.1640	fig|636.4.peg.3304
ETAE_2407	fabG	Unknown	3-ketoacyl-(acyl-carrier-protein) reductase	fig|718251.4.peg.2241	fig|667120.3.peg.1614	fig|67780.5.peg.2829	fig|634503.5.peg.2541	fig|667121.3.peg.332	fig|500638.4.peg.1641	fig|636.4.peg.3303
ETAE_2408	ubiX	Cytoplasmic	3-octaprenyl-4-hydroxybenzoate carboxy-lyase	fig|718251.4.peg.2242	fig|667120.3.peg.1615	fig|67780.5.peg.2828	fig|634503.5.peg.2542	fig|667121.3.peg.333	fig|500638.4.peg.1642	fig|636.4.peg.3302
ETAE_2409	purF	Cytoplasmic	amidophosphoribosyltransferase	fig|718251.4.peg.2243	fig|667120.3.peg.1616	fig|67780.5.peg.2827	fig|634503.5.peg.2543	fig|667121.3.peg.334	fig|500638.4.peg.1643	fig|636.4.peg.3301
ETAE_2410	cvpA	CytoplasmicMembrane	colicin V production protein	fig|718251.4.peg.2244	fig|667120.3.peg.1617	fig|67780.5.peg.2826	fig|634503.5.peg.2544	fig|667121.3.peg.335	fig|500638.4.peg.1644	fig|636.4.peg.3300
ETAE_2412	folC	Unknown	bifunctional folylpolyglutamate synthase/ dihydrofolate synthase	fig|718251.4.peg.2246	fig|667120.3.peg.1619	fig|67780.5.peg.2823	fig|634503.5.peg.2546	fig|667121.3.peg.337	fig|500638.4.peg.1646	fig|636.4.peg.3298
ETAE_2413	accD	Unknown	acetyl-CoA carboxylase, carboxyl transferase, beta subunit	fig|718251.4.peg.2247	fig|667120.3.peg.1621	fig|67780.5.peg.2822	fig|634503.5.peg.2547	fig|667121.3.peg.338	fig|500638.4.peg.1647	fig|636.4.peg.3297
ETAE_2414	dedA	CytoplasmicMembrane	integral membrane protein	fig|718251.4.peg.2248	fig|667120.3.peg.1622	fig|67780.5.peg.2821	fig|634503.5.peg.2549	fig|667121.3.peg.339	fig|500638.4.peg.1648	fig|636.4.peg.3296
ETAE_2415	truA	Unknown	tRNA pseudouridine synthase A	fig|718251.4.peg.2249	fig|667120.3.peg.1623	fig|67780.5.peg.2820	fig|634503.5.peg.2550	fig|667121.3.peg.340	fig|500638.4.peg.1649	fig|636.4.peg.3295
ETAE_2417	pdxB	Cytoplasmic	erythronate-4-phosphate dehydrogenase	fig|718251.4.peg.2251	fig|667120.3.peg.1625	fig|67780.5.peg.2818	fig|634503.5.peg.2552	fig|667121.3.peg.342	fig|500638.4.peg.1651	fig|636.4.peg.3293
ETAE_2421	fabB	Cytoplasmic	3-oxoacyl-(acyl carrier protein) synthase I	fig|718251.4.peg.2255	fig|667120.3.peg.3152	fig|67780.5.peg.302	fig|634503.5.peg.2557	fig|667121.3.peg.496	fig|500638.4.peg.1660	fig|636.4.peg.1418
ETAE_2423		Unknown	hypothetical protein	fig|718251.4.peg.2257	fig|667120.3.peg.3150	fig|67780.5.peg.300	fig|634503.5.peg.2559	fig|667121.3.peg.1241	fig|500638.4.peg.1662	fig|636.4.peg.1416
ETAE_2424		Cytoplasmic	putative transporting ATPase	fig|718251.4.peg.2258	fig|667120.3.peg.3149	fig|67780.5.peg.299	fig|634503.5.peg.2560	fig|667121.3.peg.1242	fig|500638.4.peg.1663	fig|636.4.peg.1415
ETAE_2425		CytoplasmicMembrane	hypothetical protein	fig|718251.4.peg.2259	fig|667120.3.peg.3148	fig|67780.5.peg.298	fig|634503.5.peg.2561	fig|667121.3.peg.1243	fig|500638.4.peg.1664	fig|636.4.peg.1414
ETAE_2444	mepA	Periplasmic	penicillin-insensitive murein endopeptidase	fig|718251.4.peg.2277	fig|667120.3.peg.3129	fig|67780.5.peg.876	fig|634503.5.peg.2583	fig|667121.3.peg.1244	fig|500638.4.peg.1665	fig|636.4.peg.1413
ETAE_2445	aroC	Unknown	chorismate synthase	fig|718251.4.peg.2278	fig|667120.3.peg.3128	fig|67780.5.peg.875	fig|634503.5.peg.2584	fig|667121.3.peg.1245	fig|500638.4.peg.1666	fig|636.4.peg.1412
ETAE_2446		Cytoplasmic	N5-glutamine S-adenosyl-L-methionine-dependent methyltransferase	fig|718251.4.peg.2279	fig|667120.3.peg.3127	fig|67780.5.peg.874	fig|634503.5.peg.2585	fig|667121.3.peg.1246	fig|500638.4.peg.1667	fig|636.4.peg.1411
ETAE_2447		Cytoplasmic	hypothetical protein	fig|718251.4.peg.2280	fig|667120.3.peg.3126	fig|67780.5.peg.873	fig|634503.5.peg.2586	fig|667121.3.peg.1247	fig|500638.4.peg.1668	fig|636.4.peg.1410
ETAE_2449		Unknown	hypothetical protein	fig|718251.4.peg.2282	fig|667120.3.peg.3124	fig|67780.5.peg.871	fig|634503.5.peg.2588	fig|667121.3.peg.1250	fig|500638.4.peg.1671	fig|636.4.peg.1407
ETAE_2451	fadL	OuterMembrane	long-chain fatty acid transport protein	fig|718251.4.peg.2283	fig|667120.3.peg.3122	fig|67780.5.peg.870	fig|634503.5.peg.2589	fig|667121.3.peg.1251	fig|500638.4.peg.1672	fig|636.4.peg.1406
ETAE_2452	vacJ	Unknown	surface lipoprotein	fig|718251.4.peg.2284	fig|667120.3.peg.3121	fig|67780.5.peg.869	fig|634503.5.peg.2590	fig|667121.3.peg.1252	fig|500638.4.peg.1673	fig|636.4.peg.1405
ETAE_2453	ccmH	Unknown	cytochrome C biogenesis factor	fig|718251.4.peg.2285	fig|667120.3.peg.3120	fig|67780.5.peg.868	fig|634503.5.peg.2591	fig|667121.3.peg.1253	fig|500638.4.peg.1674	fig|636.4.peg.1404
ETAE_2454	ccmH	Unknown	cytochrome C biogenesis factor	fig|718251.4.peg.2286	fig|667120.3.peg.3119	fig|67780.5.peg.867	fig|634503.5.peg.2592	fig|667121.3.peg.1254	fig|500638.4.peg.1675	fig|636.4.peg.1403
ETAE_2455	ccmG	Periplasmic	cytochrome c biogenesis protein CcmG	fig|718251.4.peg.2287	fig|667120.3.peg.3118	fig|67780.5.peg.866	fig|634503.5.peg.2593	fig|667121.3.peg.1255	fig|500638.4.peg.1676	fig|636.4.peg.1402
ETAE_2456	ccmF	CytoplasmicMembrane	cytochrome c-type biogenesis protein	fig|718251.4.peg.2288	fig|667120.3.peg.3117	fig|67780.5.peg.865	fig|634503.5.peg.2594	fig|667121.3.peg.1256	fig|500638.4.peg.1677	fig|636.4.peg.1401
ETAE_2457	ccmE	Unknown	cytochrome c-type biogenesis protein	fig|718251.4.peg.2289	fig|667120.3.peg.3116	fig|67780.5.peg.864	fig|634503.5.peg.2595	fig|667121.3.peg.1257	fig|500638.4.peg.1678	fig|636.4.peg.1400
ETAE_2459	ccmC	CytoplasmicMembrane	heme exporter protein C	fig|718251.4.peg.2291	fig|667120.3.peg.3114	fig|67780.5.peg.862	fig|634503.5.peg.2597	fig|667121.3.peg.1259	fig|500638.4.peg.1680	fig|636.4.peg.1398
ETAE_2460	ccmB	CytoplasmicMembrane	heme exporter protein B	fig|718251.4.peg.2292	fig|667120.3.peg.3113	fig|67780.5.peg.861	fig|634503.5.peg.2598	fig|667121.3.peg.1260	fig|500638.4.peg.1681	fig|636.4.peg.1397
ETAE_2461	ccmA	Cytoplasmic	heme exporter protein	fig|718251.4.peg.2293	fig|667120.3.peg.3112	fig|67780.5.peg.860	fig|634503.5.peg.2599	fig|667121.3.peg.1261	fig|500638.4.peg.1682	fig|636.4.peg.1396
ETAE_2462		Unknown	hypothetical protein	fig|718251.4.peg.2294	fig|667120.3.peg.3109	fig|67780.5.peg.858	fig|634503.5.peg.2601	fig|667121.3.peg.1262	fig|500638.4.peg.1683	fig|636.4.peg.1395
ETAE_2463		CytoplasmicMembrane	hypothetical protein	fig|718251.4.peg.2295	fig|667120.3.peg.3108	fig|67780.5.peg.857	fig|634503.5.peg.2602	fig|667121.3.peg.1263	fig|500638.4.peg.1684	fig|636.4.peg.1394
ETAE_2464		CytoplasmicMembrane	hypothetical protein	fig|718251.4.peg.2296	fig|667120.3.peg.3107	fig|67780.5.peg.856	fig|634503.5.peg.2603	fig|667121.3.peg.1264	fig|500638.4.peg.1685	fig|636.4.peg.1393
ETAE_2489		CytoplasmicMembrane	hypothetical protein	fig|718251.4.peg.2299	fig|667120.3.peg.1753	fig|67780.5.peg.773	fig|634503.5.peg.2609	fig|667121.3.peg.3251	fig|500638.4.peg.1755	fig|636.4.peg.1385
ETAE_2504		Unknown	rhodanese-related sulfurtransferase	fig|718251.4.peg.2313	fig|667120.3.peg.755	fig|67780.5.peg.769	fig|634503.5.peg.2613	fig|667121.3.peg.3257	fig|500638.4.peg.1761	fig|636.4.peg.1379
ETAE_2507	mltB	CytoplasmicMembrane	murein hydrolase B	fig|718251.4.peg.2315	fig|667120.3.peg.757	fig|67780.5.peg.767	fig|634503.5.peg.2615	fig|667121.3.peg.3259	fig|500638.4.peg.1763	fig|636.4.peg.1377
ETAE_2509	cstA	CytoplasmicMembrane	carbon starvation protein, predicted membrane protein	fig|718251.4.peg.2317	fig|667120.3.peg.759	fig|67780.5.peg.765	fig|634503.5.peg.2617	fig|667121.3.peg.3262	fig|500638.4.peg.1766	fig|636.4.peg.1374
ETAE_2510		Unknown	hypothetical protein	fig|718251.4.peg.2318	fig|667120.3.peg.760	fig|67780.5.peg.764	fig|634503.5.peg.2618	fig|667121.3.peg.3263	fig|500638.4.peg.1767	fig|636.4.peg.1373
ETAE_2514		Unknown	hypothetical protein	fig|718251.4.peg.2322	fig|667120.3.peg.764	fig|67780.5.peg.760	fig|634503.5.peg.2621	fig|667121.3.peg.3266	fig|500638.4.peg.1770	fig|636.4.peg.1370
ETAE_2515	leuE	CytoplasmicMembrane	lysine exporter protein (LYSE/YGGA)	fig|718251.4.peg.2323	fig|667120.3.peg.765	fig|67780.5.peg.759	fig|634503.5.peg.2622	fig|667121.3.peg.3267	fig|500638.4.peg.1771	fig|636.4.peg.1369
ETAE_2516		Cytoplasmic	putative AraC-family transcriptional regulatory protein	fig|718251.4.peg.2324	fig|667120.3.peg.766	fig|67780.5.peg.758	fig|634503.5.peg.2623	fig|667121.3.peg.3268	fig|500638.4.peg.1772	fig|636.4.peg.1368
ETAE_2517	eco	Periplasmic	ecotin precursor	fig|718251.4.peg.2325	fig|667120.3.peg.767	fig|67780.5.peg.757	fig|634503.5.peg.2624	fig|667121.3.peg.3269	fig|500638.4.peg.1773	fig|636.4.peg.1367
ETAE_2518	ybiT	CytoplasmicMembrane	putative ATP-binding component of a transport system	fig|718251.4.peg.2326	fig|667120.3.peg.768	fig|67780.5.peg.756	fig|634503.5.peg.2625	fig|667121.3.peg.3270	fig|500638.4.peg.1774	fig|636.4.peg.1366
ETAE_2520		Unknown	transcriptional regulator (LysR family)	fig|718251.4.peg.2327	fig|667120.3.peg.769	fig|67780.5.peg.754	fig|634503.5.peg.2627	fig|667121.3.peg.1568	fig|500638.4.peg.1776	fig|636.4.peg.1364
ETAE_2522		Cytoplasmic	HNH endonuclease	fig|718251.4.peg.2329	fig|667120.3.peg.771	fig|67780.5.peg.752	fig|634503.5.peg.2629	fig|667121.3.peg.1566	fig|500638.4.peg.1778	fig|636.4.peg.1362
ETAE_2525		Cytoplasmic	ThiJ/PfpI-family thiamine biogenesis protein	fig|718251.4.peg.2332	fig|667120.3.peg.3798	fig|67780.5.peg.750	fig|634503.5.peg.2631	fig|667121.3.peg.1564	fig|500638.4.peg.1780	fig|636.4.peg.1360
ETAE_2526	gatY	Cytoplasmic	tagatose-bisphosphate aldolase	fig|718251.4.peg.2333	fig|667120.3.peg.3797	fig|67780.5.peg.749	fig|634503.5.peg.2632	fig|667121.3.peg.1563	fig|500638.4.peg.1781	fig|636.4.peg.1359
ETAE_2527		Unknown	hypothetical protein	fig|718251.4.peg.2334	fig|667120.3.peg.3796	fig|67780.5.peg.748	fig|634503.5.peg.2633	fig|667121.3.peg.1562	fig|500638.4.peg.1782	fig|636.4.peg.1358
ETAE_2528		Unknown	putative sulfatase	fig|718251.4.peg.2335	fig|667120.3.peg.3795	fig|67780.5.peg.747	fig|634503.5.peg.2634	fig|667121.3.peg.1561	fig|500638.4.peg.1783	fig|636.4.peg.1357
ETAE_2530		Cytoplasmic	glycosyl hydrolase, family 88	fig|718251.4.peg.2337	fig|667120.3.peg.3793	fig|67780.5.peg.745	fig|634503.5.peg.2637	fig|667121.3.peg.1559	fig|500638.4.peg.1785	fig|636.4.peg.1355
ETAE_2531		Unknown	acetylglucosamine-6-phosphate deacetylase	fig|718251.4.peg.2338	fig|667120.3.peg.3792	fig|67780.5.peg.744	fig|634503.5.peg.2638	fig|667121.3.peg.1558	fig|500638.4.peg.1786	fig|636.4.peg.1354
ETAE_2532	agaF	Cytoplasmic	PTS system, N-acetylgalactosamine-specific IIA	fig|718251.4.peg.2339	fig|667120.3.peg.3791	fig|67780.5.peg.743	fig|634503.5.peg.2639	fig|667121.3.peg.1557	fig|500638.4.peg.1787	fig|636.4.peg.1353
ETAE_2533	agaE	CytoplasmicMembrane	PTS system, N-acetylgalactosamine-specific IID	fig|718251.4.peg.2340	fig|667120.3.peg.3790	fig|67780.5.peg.742	fig|634503.5.peg.2640	fig|667121.3.peg.1556	fig|500638.4.peg.1788	fig|636.4.peg.1352
ETAE_2534	agaW	CytoplasmicMembrane	PTS system, N-acetylgalactosamine-specific IIC	fig|718251.4.peg.2341	fig|667120.3.peg.3789	fig|67780.5.peg.741	fig|634503.5.peg.2641	fig|667121.3.peg.1555	fig|500638.4.peg.1789	fig|636.4.peg.1351
ETAE_2535		Cytoplasmic	PTS system, N-acetylgalactosamine-specific IIB	fig|718251.4.peg.2342	fig|667120.3.peg.3788	fig|67780.5.peg.740	fig|634503.5.peg.2642	fig|667121.3.peg.1554	fig|500638.4.peg.1790	fig|636.4.peg.1350
ETAE_2536		CytoplasmicMembrane	putative phosphosugar isomerase	fig|718251.4.peg.2343	fig|667120.3.peg.3787	fig|67780.5.peg.739	fig|634503.5.peg.2643	fig|667121.3.peg.1553	fig|500638.4.peg.1791	fig|636.4.peg.1349
ETAE_2537	kbaZ	Cytoplasmic	tagatose 6-phosphate kinase KbaZ	fig|718251.4.peg.2344	fig|667120.3.peg.3786	fig|67780.5.peg.738	fig|634503.5.peg.2644	fig|667121.3.peg.1552	fig|500638.4.peg.1792	fig|636.4.peg.1348
ETAE_2538	glpR	Cytoplasmic	transcriptional regulator	fig|718251.4.peg.2345	fig|667120.3.peg.3785	fig|67780.5.peg.737	fig|634503.5.peg.2645	fig|667121.3.peg.1551	fig|500638.4.peg.1793	fig|636.4.peg.1347
ETAE_2540		CytoplasmicMembrane	hypothetical protein	fig|718251.4.peg.2347	fig|667120.3.peg.3783	fig|67780.5.peg.736	fig|634503.5.peg.2647	fig|667121.3.peg.1549	fig|500638.4.peg.1795	fig|636.4.peg.1346
ETAE_2541	pbpG	Periplasmic	D-alanyl-D-alanine endopeptidase	fig|718251.4.peg.2348	fig|667120.3.peg.3782	fig|67780.5.peg.735	fig|634503.5.peg.2648	fig|667121.3.peg.1548	fig|500638.4.peg.1796	fig|636.4.peg.1345
ETAE_2545	dusC	Cytoplasmic	tRNA-dihydrouridine synthase C	fig|718251.4.peg.2351	fig|667120.3.peg.3778	fig|67780.5.peg.732	fig|634503.5.peg.2651	fig|667121.3.peg.1545	fig|500638.4.peg.1799	fig|636.4.peg.1342
ETAE_2546		Unknown	hypothetical protein	fig|718251.4.peg.2352	fig|667120.3.peg.3777	fig|67780.5.peg.731	fig|634503.5.peg.2652	fig|667121.3.peg.1544	fig|500638.4.peg.1800	fig|636.4.peg.1341
ETAE_2551	bioC	Unknown	biotin biosynthesis protein	fig|718251.4.peg.2356	fig|667120.3.peg.3772	fig|67780.5.peg.727	fig|634503.5.peg.2656	fig|667121.3.peg.1541	fig|500638.4.peg.1804	fig|636.4.peg.1338
ETAE_2553	bioF	Unknown	7-keto-8-aminopelargonate synthetase	fig|718251.4.peg.2358	fig|667120.3.peg.3771	fig|67780.5.peg.726	fig|634503.5.peg.2657	fig|667121.3.peg.1540	fig|500638.4.peg.1806	fig|636.4.peg.1337
ETAE_2554	bioB	Unknown	biotin synthase	fig|718251.4.peg.2359	fig|667120.3.peg.3770	fig|67780.5.peg.725	fig|634503.5.peg.2658	fig|667121.3.peg.1539	fig|500638.4.peg.1807	fig|636.4.peg.1336
ETAE_2555	bioA	Cytoplasmic	adenosylmethionine-8-amino-7-oxononanoate aminotransferase	fig|718251.4.peg.2360	fig|667120.3.peg.3769	fig|67780.5.peg.724	fig|634503.5.peg.2659	fig|667121.3.peg.1475	fig|500638.4.peg.1808	fig|636.4.peg.1335
ETAE_2556		Cytoplasmic	putative hydrolase	fig|718251.4.peg.2361	fig|667120.3.peg.3763	fig|67780.5.peg.722	fig|634503.5.peg.2661	fig|667121.3.peg.1474	fig|500638.4.peg.1809	fig|636.4.peg.1334
ETAE_2557	modC	Cytoplasmic	molybdate ABC transporter, ATP-binding protein	fig|718251.4.peg.2362	fig|667120.3.peg.3762	fig|67780.5.peg.721	fig|634503.5.peg.2662	fig|667121.3.peg.1473	fig|500638.4.peg.1810	fig|636.4.peg.1333
ETAE_2558	modB	CytoplasmicMembrane	molybdate ABC transporter permease protein	fig|718251.4.peg.2363	fig|667120.3.peg.3761	fig|67780.5.peg.720	fig|634503.5.peg.2663	fig|667121.3.peg.1472	fig|500638.4.peg.1811	fig|636.4.peg.1332
ETAE_2559	modA	Periplasmic	molybdate transporter periplasmic protein	fig|718251.4.peg.2364	fig|667120.3.peg.3760	fig|67780.5.peg.719	fig|634503.5.peg.2664	fig|667121.3.peg.1471	fig|500638.4.peg.1812	fig|636.4.peg.1331
ETAE_2560		Unknown	hypothetical protein	fig|718251.4.peg.2365	fig|667120.3.peg.3759	fig|67780.5.peg.718	fig|634503.5.peg.2665	fig|667121.3.peg.1470	fig|500638.4.peg.1813	fig|636.4.peg.1330
ETAE_2561		Unknown	hypothetical protein	fig|718251.4.peg.2366	fig|667120.3.peg.3758	fig|67780.5.peg.717	fig|634503.5.peg.2666	fig|667121.3.peg.1469	fig|500638.4.peg.1814	fig|636.4.peg.1329
ETAE_2562		Cytoplasmic	transcriptional regulator, ModE family	fig|718251.4.peg.2367	fig|667120.3.peg.3757	fig|67780.5.peg.716	fig|634503.5.peg.2667	fig|667121.3.peg.1468	fig|500638.4.peg.1815	fig|636.4.peg.1328
ETAE_2564	galE	Unknown	UDP-glucose 4-epimerase	fig|718251.4.peg.2369	fig|667120.3.peg.3755	fig|67780.5.peg.714	fig|634503.5.peg.2669	fig|667121.3.peg.1466	fig|500638.4.peg.1817	fig|636.4.peg.1326
ETAE_2565	galT	Unknown	galactose-1-phosphate uridylyltransferase	fig|718251.4.peg.2370	fig|667120.3.peg.3754	fig|67780.5.peg.713	fig|634503.5.peg.2670	fig|667121.3.peg.1465	fig|500638.4.peg.1818	fig|636.4.peg.1325
ETAE_2566	galK	Cytoplasmic	galactokinase	fig|718251.4.peg.2371	fig|667120.3.peg.3753	fig|67780.5.peg.712	fig|634503.5.peg.2671	fig|667121.3.peg.1464	fig|500638.4.peg.1819	fig|636.4.peg.1324
ETAE_2567	galM	Periplasmic	aldose 1-epimerase	fig|718251.4.peg.2372	fig|667120.3.peg.3752	fig|67780.5.peg.711	fig|634503.5.peg.2672	fig|667121.3.peg.1463	fig|500638.4.peg.1820	fig|636.4.peg.1323
ETAE_2568		CytoplasmicMembrane	hypothetical protein	fig|718251.4.peg.2373	fig|667120.3.peg.3751	fig|67780.5.peg.710	fig|634503.5.peg.2673	fig|667121.3.peg.1462	fig|500638.4.peg.1821	fig|636.4.peg.1322
ETAE_2569	gpmA	Unknown	phosphoglyceromutase	fig|718251.4.peg.2374	fig|667120.3.peg.3749	fig|67780.5.peg.709	fig|634503.5.peg.2674	fig|667121.3.peg.1461	fig|500638.4.peg.1822	fig|636.4.peg.1321
ETAE_2570	aroG	Cytoplasmic	DAHP synthetase; phenylalanine repressible	fig|718251.4.peg.2375	fig|667120.3.peg.3748	fig|67780.5.peg.708	fig|634503.5.peg.2675	fig|667121.3.peg.1460	fig|500638.4.peg.1823	fig|636.4.peg.1320
ETAE_2572	excC	OuterMembrane	peptidoglycan-associated outer membrane lipoprotein	fig|718251.4.peg.2377	fig|667120.3.peg.1221	fig|67780.5.peg.2516	fig|634503.5.peg.2678	fig|667121.3.peg.1725	fig|500638.4.peg.1825	fig|636.4.peg.1318
ETAE_2573	tolB	Periplasmic	translocation protein	fig|718251.4.peg.2378	fig|667120.3.peg.1220	fig|67780.5.peg.2517	fig|634503.5.peg.2679	fig|667121.3.peg.1726	fig|500638.4.peg.1826	fig|636.4.peg.1317
ETAE_2575	tolR	CytoplasmicMembrane	colicin uptake protein	fig|718251.4.peg.2380	fig|667120.3.peg.1218	fig|67780.5.peg.2519	fig|634503.5.peg.2681	fig|667121.3.peg.1078	fig|500638.4.peg.1829	fig|636.4.peg.1314
ETAE_2576	tolQ	CytoplasmicMembrane	Tol-Pal system	fig|718251.4.peg.2381	fig|667120.3.peg.1217	fig|67780.5.peg.2520	fig|634503.5.peg.2682	fig|667121.3.peg.1077	fig|500638.4.peg.1830	fig|636.4.peg.1313
ETAE_2577		Unknown	Pol-Pal system-associated acyl-CoA thioesterase	fig|718251.4.peg.2382	fig|667120.3.peg.1216	fig|67780.5.peg.2521	fig|634503.5.peg.2683	fig|667121.3.peg.1076	fig|500638.4.peg.1831	fig|636.4.peg.1312
ETAE_2578	ybgE	CytoplasmicMembrane	cyd operon protein	fig|718251.4.peg.2383	fig|667120.3.peg.1215	fig|67780.5.peg.2522	fig|634503.5.peg.2684	fig|667121.3.peg.1075	fig|500638.4.peg.1832	fig|636.4.peg.1311
ETAE_2579	cydB	CytoplasmicMembrane	cytochrome D ubiquinol oxidase subunit II	fig|718251.4.peg.2384	fig|667120.3.peg.1214	fig|67780.5.peg.2524	fig|634503.5.peg.2686	fig|667121.3.peg.1073	fig|500638.4.peg.1834	fig|636.4.peg.1309
ETAE_2580	cydA	CytoplasmicMembrane	cytochrome d terminal oxidase, polypeptide subunit I	fig|718251.4.peg.2385	fig|667120.3.peg.1213	fig|67780.5.peg.2525	fig|634503.5.peg.2687	fig|667121.3.peg.2594	fig|500638.4.peg.1835	fig|636.4.peg.1308
ETAE_2581	sucD	Unknown	succinyl-CoA synthetase subunit alpha	fig|718251.4.peg.2387	fig|667120.3.peg.1212	fig|67780.5.peg.2526	fig|634503.5.peg.2688	fig|667121.3.peg.2593	fig|500638.4.peg.1836	fig|636.4.peg.1307
ETAE_2582	sucC	Cytoplasmic	succinyl-CoA synthetase subunit beta	fig|718251.4.peg.2388	fig|667120.3.peg.1211	fig|67780.5.peg.2527	fig|634503.5.peg.2689	fig|667121.3.peg.2592	fig|500638.4.peg.1837	fig|636.4.peg.1306
ETAE_2583	sucB	Cytoplasmic	2-oxoglutarate dehydrogenase, E2 subunit, dihydrolipoamide succinyltransferase	fig|718251.4.peg.2389	fig|667120.3.peg.1210	fig|67780.5.peg.2528	fig|634503.5.peg.2690	fig|667121.3.peg.2591	fig|500638.4.peg.1838	fig|636.4.peg.1305
ETAE_2585	sdhB	Unknown	succinate dehydrogenase iron-sulfur subunit	fig|718251.4.peg.2391	fig|667120.3.peg.1208	fig|67780.5.peg.2531	fig|634503.5.peg.2692	fig|667121.3.peg.2588	fig|500638.4.peg.1841	fig|636.4.peg.1303
ETAE_2586	sdhA	Periplasmic	succinate dehydrogenase catalytic subunit	fig|718251.4.peg.2392	fig|667120.3.peg.1207	fig|67780.5.peg.2532	fig|634503.5.peg.2693	fig|667121.3.peg.2587	fig|500638.4.peg.1842	fig|636.4.peg.1302
ETAE_2589	gltA	Cytoplasmic	type II citrate synthase	fig|718251.4.peg.2395	fig|667120.3.peg.1204	fig|67780.5.peg.2536	fig|634503.5.peg.2697	fig|667121.3.peg.2584	fig|500638.4.peg.1845	fig|636.4.peg.1299
ETAE_2591	rimL	Cytoplasmic	acetyltransferases, including N-acetylases of ribosomal proteins	fig|718251.4.peg.2397	fig|667120.3.peg.1202	fig|67780.5.peg.2538	fig|634503.5.peg.2699	fig|667121.3.peg.2583	fig|500638.4.peg.1846	fig|636.4.peg.1298
ETAE_2592	phnA	Unknown	alkylphosphonate utilization operon protein	fig|718251.4.peg.2398	fig|667120.3.peg.1201	fig|67780.5.peg.2539	fig|634503.5.peg.2700	fig|667121.3.peg.2582	fig|500638.4.peg.1847	fig|636.4.peg.1297
ETAE_2593	edwR	Cytoplasmic	AHL-dependent transcriptional regulator	fig|718251.4.peg.2399	fig|667120.3.peg.1199	fig|67780.5.peg.2540	fig|634503.5.peg.2701	fig|667121.3.peg.2581	fig|500638.4.peg.1848	fig|636.4.peg.1296
ETAE_2594	edwI	Cytoplasmic	AHL-synthase	fig|718251.4.peg.2400	fig|667120.3.peg.1198	fig|67780.5.peg.2541	fig|634503.5.peg.2702	fig|667121.3.peg.2580	fig|500638.4.peg.1849	fig|636.4.peg.1295
ETAE_2596	pde	Periplasmic	3',5'-cyclic-nucleotide phosphodiesterase	fig|718251.4.peg.2402	fig|667120.3.peg.1196	fig|67780.5.peg.1728	fig|634503.5.peg.2706	fig|667121.3.peg.2299	fig|500638.4.peg.1851	fig|636.4.peg.1293
ETAE_2597	phrB	Unknown	deoxyribodipyrimidine photo-lyase	fig|718251.4.peg.2403	fig|667120.3.peg.1195	fig|67780.5.peg.1729	fig|634503.5.peg.2707	fig|667121.3.peg.2298	fig|500638.4.peg.1852	fig|636.4.peg.1292
ETAE_2598		Unknown	hypothetical protein	fig|718251.4.peg.2404	fig|667120.3.peg.1194	fig|67780.5.peg.1730	fig|634503.5.peg.2708	fig|667121.3.peg.2297	fig|500638.4.peg.1853	fig|636.4.peg.1291
ETAE_2600	kdpA	CytoplasmicMembrane	potassium-transporting ATPase subunit A	fig|718251.4.peg.2406	fig|667120.3.peg.1192	fig|67780.5.peg.1732	fig|634503.5.peg.2710	fig|667121.3.peg.2295	fig|500638.4.peg.1861	fig|636.4.peg.1289
ETAE_2601	kdpB	CytoplasmicMembrane	potassium-transporting ATPase subunit B	fig|718251.4.peg.2407	fig|667120.3.peg.1191	fig|67780.5.peg.1733	fig|634503.5.peg.2711	fig|667121.3.peg.2294	fig|500638.4.peg.1862	fig|636.4.peg.1288
ETAE_2602	kdpC	Unknown	potassium-transporting ATPase subunit C	fig|718251.4.peg.2408	fig|667120.3.peg.1190	fig|67780.5.peg.1734	fig|634503.5.peg.2712	fig|667121.3.peg.2293	fig|500638.4.peg.1863	fig|636.4.peg.1287
ETAE_2603	kdpD	CytoplasmicMembrane	sensor protein	fig|718251.4.peg.2409	fig|667120.3.peg.1189	fig|67780.5.peg.1735	fig|634503.5.peg.2713	fig|667121.3.peg.2292	fig|500638.4.peg.1864	fig|636.4.peg.1286
ETAE_2605	pgm	Unknown	phosphoglucomutase, alpha-D-glucose phosphate-specific	fig|718251.4.peg.2411	fig|667120.3.peg.1187	fig|67780.5.peg.1737	fig|634503.5.peg.2715	fig|667121.3.peg.2290	fig|500638.4.peg.1866	fig|636.4.peg.1284
ETAE_2606	seqA	Unknown	replication initiation regulator	fig|718251.4.peg.2412	fig|667120.3.peg.1186	fig|67780.5.peg.1738	fig|634503.5.peg.2716	fig|667121.3.peg.2289	fig|500638.4.peg.1867	fig|636.4.peg.1283
ETAE_2607		Unknown	esterase, DmpD/TodF/XylF family	fig|718251.4.peg.2413	fig|667120.3.peg.1185	fig|67780.5.peg.1739	fig|634503.5.peg.2717	fig|667121.3.peg.2288	fig|500638.4.peg.1868	fig|636.4.peg.1282
ETAE_2608		Cytoplasmic	LexA regulated protein/CopG domain protein DNA-binding domain protein	fig|718251.4.peg.2414	fig|667120.3.peg.1184	fig|67780.5.peg.1741	fig|634503.5.peg.2719	fig|667121.3.peg.2287	fig|500638.4.peg.1869	fig|636.4.peg.1281
ETAE_2609	fldA	Cytoplasmic	flavodoxin	fig|718251.4.peg.2415	fig|667120.3.peg.1183	fig|67780.5.peg.1742	fig|634503.5.peg.2720	fig|667121.3.peg.2286	fig|500638.4.peg.1870	fig|636.4.peg.1280
ETAE_2610	fur	Cytoplasmic	ferric uptake regulator	fig|718251.4.peg.2416	fig|667120.3.peg.1182	fig|67780.5.peg.1743	fig|634503.5.peg.2721	fig|667121.3.peg.2285	fig|500638.4.peg.1871	fig|636.4.peg.1279
ETAE_2611	nagZ	Unknown	beta-N-acetylhexosaminidase	fig|718251.4.peg.2417	fig|667120.3.peg.1181	fig|67780.5.peg.1598	fig|634503.5.peg.2725	fig|667121.3.peg.2284	fig|500638.4.peg.1872	fig|636.4.peg.1278
ETAE_2612		Unknown	lipoprotein	fig|718251.4.peg.2418	fig|667120.3.peg.1180	fig|67780.5.peg.1597	fig|634503.5.peg.2726	fig|667121.3.peg.2283	fig|500638.4.peg.1873	fig|636.4.peg.1277
ETAE_2613		OuterMembrane	outer membrane porin, OprD family	fig|718251.4.peg.2419	fig|667120.3.peg.1179	fig|67780.5.peg.1596	fig|634503.5.peg.2727	fig|667121.3.peg.2282	fig|500638.4.peg.1874	fig|636.4.peg.1276
ETAE_2615	glnS	Cytoplasmic	glutaminyl-tRNA synthetase	fig|718251.4.peg.2420	fig|667120.3.peg.1176	fig|67780.5.peg.1595	fig|634503.5.peg.2728	fig|667121.3.peg.2281	fig|500638.4.peg.1876	fig|636.4.peg.1274
ETAE_2616	nagE	CytoplasmicMembrane	PTS system, N-acetylglucosamine-specific IIBC subunit	fig|718251.4.peg.2421	fig|667120.3.peg.1175	fig|67780.5.peg.1594	fig|634503.5.peg.2729	fig|667121.3.peg.2280	fig|500638.4.peg.1877	fig|636.4.peg.1273
ETAE_2617	nagB	Unknown	glucosamine-6-phosphate deaminase	fig|718251.4.peg.2422	fig|667120.3.peg.1174	fig|67780.5.peg.1593	fig|634503.5.peg.2730	fig|667121.3.peg.2279	fig|500638.4.peg.1878	fig|636.4.peg.1272
ETAE_2619	nagC	Cytoplasmic	putative N-acetylglucosamine regulatory protein	fig|718251.4.peg.2424	fig|667120.3.peg.1172	fig|67780.5.peg.1591	fig|634503.5.peg.2732	fig|667121.3.peg.2277	fig|500638.4.peg.1880	fig|636.4.peg.1270
ETAE_2621	nagD	Unknown	UMP phosphatase	fig|718251.4.peg.2426	fig|667120.3.peg.1170	fig|67780.5.peg.1589	fig|634503.5.peg.2734	fig|667121.3.peg.2276	fig|500638.4.peg.1881	fig|636.4.peg.1269
ETAE_2623	asnB	Cytoplasmic	asparagine synthetase B	fig|718251.4.peg.2427	fig|667120.3.peg.1168	fig|67780.5.peg.1588	fig|634503.5.peg.2735	fig|667121.3.peg.2275	fig|500638.4.peg.1882	fig|636.4.peg.1268
ETAE_2624	ubiF	Unknown	2-octaprenyl-3-methyl-6-methoxy-1,4-benzoquinol hydroxylase	fig|718251.4.peg.2428	fig|667120.3.peg.1167	fig|67780.5.peg.1587	fig|634503.5.peg.2736	fig|667121.3.peg.2209	fig|500638.4.peg.1883	fig|636.4.peg.17
ETAE_2625	miaB	Cytoplasmic	rRNA modification protein	fig|718251.4.peg.2429	fig|667120.3.peg.1166	fig|67780.5.peg.1586	fig|634503.5.peg.2737	fig|667121.3.peg.2210	fig|500638.4.peg.1884	fig|636.4.peg.18
ETAE_2627		Cytoplasmic	PhoH family protein	fig|718251.4.peg.2432	fig|667120.3.peg.1163	fig|67780.5.peg.1584	fig|634503.5.peg.2739	fig|667121.3.peg.2211	fig|500638.4.peg.1885	fig|636.4.peg.19
ETAE_2629		Cytoplasmic	hypothetical protein	fig|718251.4.peg.2433	fig|667120.3.peg.1162	fig|67780.5.peg.1583	fig|634503.5.peg.2740	fig|667121.3.peg.2212	fig|500638.4.peg.1886	fig|636.4.peg.20
ETAE_2630	corC	Cytoplasmic	putative Mg2+ and Co2+ transporter	fig|718251.4.peg.2434	fig|667120.3.peg.1161	fig|67780.5.peg.1582	fig|634503.5.peg.2741	fig|667121.3.peg.2213	fig|500638.4.peg.1887	fig|636.4.peg.21
ETAE_2631		CytoplasmicMembrane	apolipoprotein N-acyltransferase	fig|718251.4.peg.2435	fig|667120.3.peg.1159	fig|67780.5.peg.1581	fig|634503.5.peg.2742	fig|667121.3.peg.2215	fig|500638.4.peg.1889	fig|636.4.peg.23
ETAE_2632	glnH	Periplasmic	glutamate and aspartate transporter subunit	fig|718251.4.peg.2436	fig|667120.3.peg.1158	fig|67780.5.peg.1580	fig|634503.5.peg.2743	fig|667121.3.peg.2216	fig|500638.4.peg.1890	fig|636.4.peg.24
ETAE_2633	gltJ	CytoplasmicMembrane	glutamate/aspartate transport system permease protein	fig|718251.4.peg.2437	fig|667120.3.peg.1157	fig|67780.5.peg.1579	fig|634503.5.peg.2744	fig|667121.3.peg.2217	fig|500638.4.peg.1891	fig|636.4.peg.25
ETAE_2634	gltK	CytoplasmicMembrane	glutamate-aspartate transport system permease	fig|718251.4.peg.2438	fig|667120.3.peg.1156	fig|67780.5.peg.1578	fig|634503.5.peg.2745	fig|667121.3.peg.2218	fig|500638.4.peg.1892	fig|636.4.peg.26
ETAE_2635	gltL	Cytoplasmic	glutamate-aspartate ABC transporter ATP-binding component	fig|718251.4.peg.2439	fig|667120.3.peg.1155	fig|67780.5.peg.1577	fig|634503.5.peg.2746	fig|667121.3.peg.2219	fig|500638.4.peg.1893	fig|636.4.peg.27
ETAE_2637		Cytoplasmic	hypothetical protein	fig|718251.4.peg.2441	fig|667120.3.peg.1152	fig|67780.5.peg.1574	fig|634503.5.peg.2749	fig|667121.3.peg.2222	fig|500638.4.peg.1896	fig|636.4.peg.30
ETAE_2638	leuS	Cytoplasmic	leucyl-tRNA synthetase	fig|718251.4.peg.2442	fig|667120.3.peg.1151	fig|67780.5.peg.1573	fig|634503.5.peg.2750	fig|667121.3.peg.2223	fig|500638.4.peg.1897	fig|636.4.peg.31
ETAE_2639	rlpB	Unknown	LPS-assembly lipoprotein	fig|718251.4.peg.2443	fig|667120.3.peg.1150	fig|67780.5.peg.1572	fig|634503.5.peg.2751	fig|667121.3.peg.2224	fig|500638.4.peg.1898	fig|636.4.peg.32
ETAE_2640	holA	Unknown	DNA polymerase III subunit delta	fig|718251.4.peg.2444	fig|667120.3.peg.1149	fig|67780.5.peg.1571	fig|634503.5.peg.2752	fig|667121.3.peg.2225	fig|500638.4.peg.1899	fig|636.4.peg.33
ETAE_2641	nadD	Unknown	nicotinic acid mononucleotide adenyltransferase	fig|718251.4.peg.2445	fig|667120.3.peg.1148	fig|67780.5.peg.1570	fig|634503.5.peg.2753	fig|667121.3.peg.2226	fig|500638.4.peg.1900	fig|636.4.peg.34
ETAE_2642		Cytoplasmic	hypothetical protein	fig|718251.4.peg.2446	fig|667120.3.peg.1147	fig|67780.5.peg.1569	fig|634503.5.peg.2754	fig|667121.3.peg.2227	fig|500638.4.peg.1901	fig|636.4.peg.35
ETAE_2643		Unknown	hypothetical protein	fig|718251.4.peg.2447	fig|667120.3.peg.1146	fig|67780.5.peg.1568	fig|634503.5.peg.2755	fig|667121.3.peg.2228	fig|500638.4.peg.1902	fig|636.4.peg.36
ETAE_2644		CytoplasmicMembrane	peptidoglycan glycosyltransferase/penicillin-binding protein 2	fig|718251.4.peg.2448	fig|667120.3.peg.1145	fig|67780.5.peg.1567	fig|634503.5.peg.2756	fig|667121.3.peg.2229	fig|500638.4.peg.1903	fig|636.4.peg.37
ETAE_2645	rodA	CytoplasmicMembrane	cell wall shape-determining protein	fig|718251.4.peg.2449	fig|667120.3.peg.1144	fig|67780.5.peg.1566	fig|634503.5.peg.2757	fig|667121.3.peg.2230	fig|500638.4.peg.1904	fig|636.4.peg.38
ETAE_2646	rlpA	Unknown	rare lipoprotein A	fig|718251.4.peg.2450	fig|667120.3.peg.1143	fig|67780.5.peg.1565	fig|634503.5.peg.2758	fig|667121.3.peg.2231	fig|500638.4.peg.1905	fig|636.4.peg.39
ETAE_2647	dacA	Periplasmic	D-alanyl-D-alanine carboxypeptidase fraction A	fig|718251.4.peg.2451	fig|667120.3.peg.1142	fig|67780.5.peg.1564	fig|634503.5.peg.2759	fig|667121.3.peg.2232	fig|500638.4.peg.1906	fig|636.4.peg.40
ETAE_2648		Cytoplasmic	hypothetical protein	fig|718251.4.peg.2452	fig|667120.3.peg.1141	fig|67780.5.peg.1563	fig|634503.5.peg.2760	fig|667121.3.peg.2233	fig|500638.4.peg.1907	fig|636.4.peg.41
ETAE_2649	lipB	Cytoplasmic	lipoate-protein ligase B	fig|718251.4.peg.2453	fig|667120.3.peg.1140	fig|67780.5.peg.1562	fig|634503.5.peg.2761	fig|667121.3.peg.2234	fig|500638.4.peg.1908	fig|636.4.peg.42
ETAE_2651	tatE	Unknown	twin argininte translocase protein A	fig|718251.4.peg.2455	fig|667120.3.peg.1138	fig|67780.5.peg.1560	fig|634503.5.peg.2763	fig|667121.3.peg.2236	fig|500638.4.peg.1909	fig|636.4.peg.44
ETAE_2652		Unknown	hypothetical protein	fig|718251.4.peg.2456	fig|667120.3.peg.1137	fig|67780.5.peg.1559	fig|634503.5.peg.2764	fig|667121.3.peg.2237	fig|500638.4.peg.1910	fig|636.4.peg.45
ETAE_2653		Cytoplasmic	aldo/keto reductase	fig|718251.4.peg.2457	fig|667120.3.peg.1136	fig|67780.5.peg.1558	fig|634503.5.peg.2765	fig|667121.3.peg.2238	fig|500638.4.peg.1911	fig|636.4.peg.46
ETAE_2654	nxiA	CytoplasmicMembrane	putative nickel transporter	fig|718251.4.peg.2458	fig|667120.3.peg.1135	fig|67780.5.peg.1557	fig|634503.5.peg.2766	fig|667121.3.peg.2239	fig|500638.4.peg.1912	fig|636.4.peg.47
ETAE_2656		Unknown	lytic transglycosylase catalytic	fig|718251.4.peg.2460	fig|667120.3.peg.1133	fig|67780.5.peg.1556	fig|634503.5.peg.2767	fig|667121.3.peg.2240	fig|500638.4.peg.1913	fig|636.4.peg.48
ETAE_2658	caiC	Cytoplasmic	putative crotonobetaine/carnitine-CoA ligase	fig|718251.4.peg.2462	fig|667120.3.peg.1131	fig|67780.5.peg.1554	fig|634503.5.peg.2769	fig|667121.3.peg.2242	fig|500638.4.peg.1915	fig|636.4.peg.50
ETAE_2660	caiD	Cytoplasmic	carnitinyl-CoA dehydratase	fig|718251.4.peg.2463	fig|667120.3.peg.1129	fig|67780.5.peg.1553	fig|634503.5.peg.2770	fig|667121.3.peg.2243	fig|500638.4.peg.1917	fig|636.4.peg.51
ETAE_2661	caiC	CytoplasmicMembrane	putative crotonobetaine/carnitine-CoA ligase	fig|718251.4.peg.2464	fig|667120.3.peg.1128	fig|67780.5.peg.1552	fig|634503.5.peg.2771	fig|667121.3.peg.2244	fig|500638.4.peg.1918	fig|636.4.peg.52
ETAE_2662	caiB	Cytoplasmic	crotonobetainyl-CoA:carnitine CoA-transferase	fig|718251.4.peg.2465	fig|667120.3.peg.1127	fig|67780.5.peg.1551	fig|634503.5.peg.2772	fig|667121.3.peg.2245	fig|500638.4.peg.1919	fig|636.4.peg.53
ETAE_2663	caiA	Cytoplasmic	crotonobetainyl-CoA dehydrogenase	fig|718251.4.peg.2466	fig|667120.3.peg.1126	fig|67780.5.peg.1550	fig|634503.5.peg.2773	fig|667121.3.peg.2246	fig|500638.4.peg.1920	fig|636.4.peg.54
ETAE_2664	caiT	CytoplasmicMembrane	L-carnitine/gamma-butyrobetaine antiporter	fig|718251.4.peg.2467	fig|667120.3.peg.1125	fig|67780.5.peg.1549	fig|634503.5.peg.2774	fig|667121.3.peg.2247	fig|500638.4.peg.1921	fig|636.4.peg.55
ETAE_2666	fixA	Cytoplasmic	electron transfer flavoprotein, beta subunit	fig|718251.4.peg.2468	fig|667120.3.peg.1123	fig|67780.5.peg.1547	fig|634503.5.peg.2775	fig|667121.3.peg.2248	fig|500638.4.peg.1923	fig|636.4.peg.56
ETAE_2667	fixB	Unknown	electron transfer flavoprotein, alpha subunit	fig|718251.4.peg.2469	fig|667120.3.peg.1122	fig|67780.5.peg.1546	fig|634503.5.peg.2776	fig|667121.3.peg.2249	fig|500638.4.peg.1924	fig|636.4.peg.57
ETAE_2669	fixX	Cytoplasmic	ferredoxin-like protein	fig|718251.4.peg.2472	fig|667120.3.peg.1120	fig|67780.5.peg.1544	fig|634503.5.peg.2778	fig|667121.3.peg.2251	fig|500638.4.peg.1926	fig|636.4.peg.59
ETAE_2671	aes	Cytoplasmic	acetyl esterase	fig|718251.4.peg.2474	fig|667120.3.peg.1118	fig|67780.5.peg.1542	fig|634503.5.peg.2780	fig|667121.3.peg.2817	fig|500638.4.peg.1928	fig|636.4.peg.61
ETAE_2672	caiF	Cytoplasmic	DNA-binding transcriptional activator	fig|718251.4.peg.2475	fig|667120.3.peg.1116	fig|67780.5.peg.1541	fig|634503.5.peg.2781	fig|667121.3.peg.2816	fig|500638.4.peg.1929	fig|636.4.peg.62
ETAE_2674	nadC	Cytoplasmic	nicotinate-nucleotide pyrophosphorylase (carboxylating)	fig|718251.4.peg.2477	fig|667120.3.peg.1114	fig|67780.5.peg.1539	fig|634503.5.peg.2783	fig|667121.3.peg.2814	fig|500638.4.peg.1931	fig|636.4.peg.64
ETAE_2679		Unknown	hypothetical protein	fig|718251.4.peg.2481	fig|667120.3.peg.1109	fig|67780.5.peg.3369	fig|634503.5.peg.2791	fig|667121.3.peg.2809	fig|500638.4.peg.1937	fig|636.4.peg.70
ETAE_2684		Unknown	putative anti-sigma regulatory factor (Ser/Thr protein kinase)	fig|718251.4.peg.2485	fig|667120.3.peg.1105	fig|67780.5.peg.3366	fig|634503.5.peg.2804	fig|667121.3.peg.2806	fig|500638.4.peg.1940	fig|636.4.peg.73
ETAE_2700	purE	Unknown	phosphoribosylaminoimidazole carboxylase catalytic subunit	fig|718251.4.peg.2501	fig|667120.3.peg.1089	fig|67780.5.peg.3350	fig|634503.5.peg.2821	fig|667121.3.peg.2262	fig|500638.4.peg.1967	fig|636.4.peg.3260
ETAE_2701	purK	Unknown	phosphoribosylaminoimidazole carboxylase	fig|718251.4.peg.2502	fig|667120.3.peg.1088	fig|67780.5.peg.3349	fig|634503.5.peg.2822	fig|667121.3.peg.2263	fig|500638.4.peg.1968	fig|636.4.peg.3261
ETAE_2703		CytoplasmicMembrane	ABC transporter-related protein	fig|718251.4.peg.2504	fig|667120.3.peg.1086	fig|67780.5.peg.3347	fig|634503.5.peg.2824	fig|667121.3.peg.2265	fig|500638.4.peg.1971	fig|636.4.peg.3263
ETAE_2704	tesA	Periplasmic	acyl-CoA thioesterase I	fig|718251.4.peg.2505	fig|667120.3.peg.1085	fig|67780.5.peg.3346	fig|634503.5.peg.2825	fig|667121.3.peg.2266	fig|500638.4.peg.1972	fig|636.4.peg.3264
ETAE_2705	dltE	Unknown	short chain dehydrogenase	fig|718251.4.peg.2506	fig|667120.3.peg.1084	fig|67780.5.peg.3345	fig|634503.5.peg.2826	fig|667121.3.peg.2267	fig|500638.4.peg.1973	fig|636.4.peg.3265
ETAE_2706		Cytoplasmic	putative thioredoxin	fig|718251.4.peg.2507	fig|667120.3.peg.1083	fig|67780.5.peg.3344	fig|634503.5.peg.2827	fig|667121.3.peg.2268	fig|500638.4.peg.1974	fig|636.4.peg.3266
ETAE_2707		CytoplasmicMembrane	hypothetical protein	fig|718251.4.peg.2508	fig|667120.3.peg.1082	fig|67780.5.peg.3343	fig|634503.5.peg.2828	fig|667121.3.peg.2269	fig|500638.4.peg.1975	fig|636.4.peg.3268
ETAE_2708		CytoplasmicMembrane	hypothetical protein	fig|718251.4.peg.2509	fig|667120.3.peg.1081	fig|67780.5.peg.3342	fig|634503.5.peg.2829	fig|667121.3.peg.2270	fig|500638.4.peg.1976	fig|636.4.peg.3269
ETAE_2710		Cytoplasmic	hypothetical protein	fig|718251.4.peg.2511	fig|667120.3.peg.1079	fig|67780.5.peg.3340	fig|634503.5.peg.2831	fig|667121.3.peg.2272	fig|500638.4.peg.1978	fig|636.4.peg.3271
ETAE_2722	rnc	Cytoplasmic	ribonuclease III	fig|718251.4.peg.2523	fig|667120.3.peg.1067	fig|67780.5.peg.3329	fig|634503.5.peg.2842	fig|667121.3.peg.2898	fig|500638.4.peg.1994	fig|636.4.peg.3282
ETAE_2723	lepB	CytoplasmicMembrane	signal peptidase I	fig|718251.4.peg.2524	fig|667120.3.peg.1066	fig|67780.5.peg.3328	fig|634503.5.peg.2843	fig|667121.3.peg.2897	fig|500638.4.peg.1995	fig|636.4.peg.3283
ETAE_2724	lepA	Cytoplasmic	GTP-binding protein	fig|718251.4.peg.2525	fig|667120.3.peg.1065	fig|67780.5.peg.3327	fig|634503.5.peg.2844	fig|667121.3.peg.2896	fig|500638.4.peg.1996	fig|636.4.peg.3284
ETAE_2725	rseC	Unknown	SoxR reducing system protein	fig|718251.4.peg.2526	fig|667120.3.peg.3817	fig|67780.5.peg.3326	fig|634503.5.peg.2845	fig|667121.3.peg.2895	fig|500638.4.peg.1997	fig|636.4.peg.2087
ETAE_2726	rseB	Periplasmic	sigma E regulatory protein	fig|718251.4.peg.2527	fig|667120.3.peg.3818	fig|67780.5.peg.3325	fig|634503.5.peg.2846	fig|667121.3.peg.2894	fig|500638.4.peg.1998	fig|636.4.peg.2088
ETAE_2727	rseA	Unknown	anti-RNA polymerase sigma factor	fig|718251.4.peg.2528	fig|667120.3.peg.3819	fig|67780.5.peg.3324	fig|634503.5.peg.2847	fig|667121.3.peg.2893	fig|500638.4.peg.1999	fig|636.4.peg.2089
ETAE_2728	rpoE	Cytoplasmic	RNA polymerase sigma factor	fig|718251.4.peg.2529	fig|667120.3.peg.3820	fig|67780.5.peg.3323	fig|634503.5.peg.2848	fig|667121.3.peg.2892	fig|500638.4.peg.2000	fig|636.4.peg.2090
ETAE_2729		CytoplasmicMembrane	branched-chain amino acid permease	fig|718251.4.peg.2530	fig|667120.3.peg.3822	fig|67780.5.peg.3322	fig|634503.5.peg.2849	fig|667121.3.peg.2891	fig|500638.4.peg.2001	fig|636.4.peg.2091
ETAE_2730		Unknown	hypothetical protein	fig|718251.4.peg.2531	fig|667120.3.peg.3823	fig|67780.5.peg.3321	fig|634503.5.peg.2850	fig|667121.3.peg.2890	fig|500638.4.peg.2002	fig|636.4.peg.2092
ETAE_2731	srmB	Cytoplasmic	ATP-dependent RNA helicase	fig|718251.4.peg.2532	fig|667120.3.peg.3824	fig|67780.5.peg.3320	fig|634503.5.peg.2851	fig|667121.3.peg.2889	fig|500638.4.peg.2003	fig|636.4.peg.2093
ETAE_2732	grcA	Cytoplasmic	autonomous glycyl radical cofactor	fig|718251.4.peg.2533	fig|667120.3.peg.3839	fig|67780.5.peg.3302	fig|634503.5.peg.2867	fig|667121.3.peg.2888	fig|500638.4.peg.2004	fig|636.4.peg.2094
ETAE_2734	udg	Unknown	uracil-DNA glycosylase	fig|718251.4.peg.2535	fig|667120.3.peg.3841	fig|67780.5.peg.3300	fig|634503.5.peg.2869	fig|667121.3.peg.2887	fig|500638.4.peg.2005	fig|636.4.peg.2095
ETAE_2735	grpE	Cytoplasmic	heat shock protein	fig|718251.4.peg.2536	fig|667120.3.peg.3842	fig|67780.5.peg.3299	fig|634503.5.peg.2870	fig|667121.3.peg.2886	fig|500638.4.peg.2006	fig|636.4.peg.2096
ETAE_2736		Unknown	inorganic polyphosphate/ATP-NAD kinase	fig|718251.4.peg.2537	fig|667120.3.peg.3843	fig|67780.5.peg.3298	fig|634503.5.peg.2871	fig|667121.3.peg.2885	fig|500638.4.peg.2007	fig|636.4.peg.2097
ETAE_2737	recN	Cytoplasmic	recombination and repair protein	fig|718251.4.peg.2538	fig|667120.3.peg.3844	fig|67780.5.peg.3297	fig|634503.5.peg.2872	fig|667121.3.peg.2884	fig|500638.4.peg.2008	fig|636.4.peg.2098
ETAE_2738	smpA	Unknown	SmpA/OmlA domain protein	fig|718251.4.peg.2539	fig|667120.3.peg.3845	fig|67780.5.peg.3296	fig|634503.5.peg.2873	fig|667121.3.peg.2883	fig|500638.4.peg.2009	fig|636.4.peg.2099
ETAE_2739		Cytoplasmic	hypothetical protein	fig|718251.4.peg.2540	fig|667120.3.peg.3846	fig|67780.5.peg.3295	fig|634503.5.peg.2874	fig|667121.3.peg.2882	fig|500638.4.peg.2010	fig|636.4.peg.2100
ETAE_2740		Unknown	cyclase/dehydrase	fig|718251.4.peg.2541	fig|667120.3.peg.3847	fig|67780.5.peg.3294	fig|634503.5.peg.2875	fig|667121.3.peg.2881	fig|500638.4.peg.2011	fig|636.4.peg.2101
ETAE_2741	smpB	Unknown	small protein B, tmRNA-binding protein	fig|718251.4.peg.2542	fig|667120.3.peg.3848	fig|67780.5.peg.3293	fig|634503.5.peg.2876	fig|667121.3.peg.2880	fig|500638.4.peg.2012	fig|636.4.peg.2102
ETAE_2751		Cytoplasmic	hypothetical protein	fig|718251.4.peg.2565	fig|667120.3.peg.3863	fig|67780.5.peg.3284	fig|634503.5.peg.2885	fig|667121.3.peg.2878	fig|500638.4.peg.2014	fig|636.4.peg.2109
ETAE_2760	eta	CytoplasmicMembrane	exfoliative toxin A/B	fig|718251.4.peg.2573	fig|667120.3.peg.3874	fig|67780.5.peg.3275	fig|634503.5.peg.2896	fig|667121.3.peg.2873	fig|500638.4.peg.2019	fig|636.4.peg.2130
ETAE_2761		Cytoplasmic	transcriptional regulator, LysR family	fig|718251.4.peg.2574	fig|667120.3.peg.3875	fig|67780.5.peg.3274	fig|634503.5.peg.2897	fig|667121.3.peg.2872	fig|500638.4.peg.2020	fig|636.4.peg.2131
ETAE_2762	dps	Cytoplasmic	DNA-binding ferritin-like protein (oxidative damage protectant)	fig|718251.4.peg.2575	fig|667120.3.peg.3876	fig|67780.5.peg.3273	fig|634503.5.peg.2898	fig|667121.3.peg.2871	fig|500638.4.peg.2021	fig|636.4.peg.2132
ETAE_2763		Cytoplasmic	hypothetical protein	fig|718251.4.peg.2576	fig|667120.3.peg.3877	fig|67780.5.peg.3272	fig|634503.5.peg.2899	fig|667121.3.peg.2870	fig|500638.4.peg.2022	fig|636.4.peg.2133
ETAE_2765	marR	Cytoplasmic	transcriptional regulator	fig|718251.4.peg.2578	fig|667120.3.peg.3878	fig|67780.5.peg.3271	fig|634503.5.peg.2900	fig|667121.3.peg.2869	fig|500638.4.peg.2023	fig|636.4.peg.2134
ETAE_2766	emrA	Unknown	multidrug resistance protein A	fig|718251.4.peg.2579	fig|667120.3.peg.3879	fig|67780.5.peg.3270	fig|634503.5.peg.2901	fig|667121.3.peg.2868	fig|500638.4.peg.2024	fig|636.4.peg.2135
ETAE_2767	emrB	CytoplasmicMembrane	multidrug resistance protein B	fig|718251.4.peg.2580	fig|667120.3.peg.3880	fig|67780.5.peg.3269	fig|634503.5.peg.2902	fig|667121.3.peg.2867	fig|500638.4.peg.2025	fig|636.4.peg.2136
ETAE_2768		Periplasmic	ABC transporter, substrate binding protein	fig|718251.4.peg.2581	fig|667120.3.peg.3882	fig|67780.5.peg.3268	fig|634503.5.peg.2903	fig|667121.3.peg.2866	fig|500638.4.peg.2026	fig|636.4.peg.2137
ETAE_2769		CytoplasmicMembrane	ABC transporter, permease protein	fig|718251.4.peg.2582	fig|667120.3.peg.3883	fig|67780.5.peg.3267	fig|634503.5.peg.2904	fig|667121.3.peg.2865	fig|500638.4.peg.2027	fig|636.4.peg.2138
ETAE_2770		Cytoplasmic	ABC transporter, ATP-binding protein	fig|718251.4.peg.2583	fig|667120.3.peg.3884	fig|67780.5.peg.3266	fig|634503.5.peg.2905	fig|667121.3.peg.2864	fig|500638.4.peg.2028	fig|636.4.peg.2139
ETAE_2771	degP	Periplasmic	serine endoprotease	fig|718251.4.peg.2584	fig|667120.3.peg.3885	fig|67780.5.peg.3265	fig|634503.5.peg.2906	fig|667121.3.peg.2863	fig|500638.4.peg.2029	fig|636.4.peg.2140
ETAE_2772	dgt	Cytoplasmic	dGTPase	fig|718251.4.peg.2585	fig|667120.3.peg.3886	fig|67780.5.peg.3264	fig|634503.5.peg.2907	fig|667121.3.peg.2862	fig|500638.4.peg.2030	fig|636.4.peg.2141
ETAE_2773	mtnN	Unknown	5'-methylthioadenosine/S-adenosylhomocysteine nucleosidase	fig|718251.4.peg.2586	fig|667120.3.peg.3887	fig|67780.5.peg.3263	fig|634503.5.peg.2908	fig|667121.3.peg.2861	fig|500638.4.peg.2031	fig|636.4.peg.2142
ETAE_2774	btuF	Periplasmic	vitamin B12-transporter protein	fig|718251.4.peg.2587	fig|667120.3.peg.3888	fig|67780.5.peg.3262	fig|634503.5.peg.2909	fig|667121.3.peg.2860	fig|500638.4.peg.2032	fig|636.4.peg.2143
ETAE_2775		CytoplasmicMembrane	hypothetical protein	fig|718251.4.peg.2588	fig|667120.3.peg.3889	fig|67780.5.peg.3261	fig|634503.5.peg.2910	fig|667121.3.peg.2859	fig|500638.4.peg.2033	fig|636.4.peg.2144
ETAE_2776	erpA	Unknown	iron-sulfur cluster insertion protein	fig|718251.4.peg.2589	fig|667120.3.peg.3890	fig|67780.5.peg.3260	fig|634503.5.peg.2911	fig|667121.3.peg.1624	fig|500638.4.peg.2034	fig|636.4.peg.2145
ETAE_2777		CytoplasmicMembrane	chloride channel core	fig|718251.4.peg.2590	fig|667120.3.peg.3891	fig|67780.5.peg.3259	fig|634503.5.peg.2912	fig|667121.3.peg.1625	fig|500638.4.peg.2035	fig|636.4.peg.2146
ETAE_2778		Cytoplasmic	glutamate-1-semialdehyde aminotransferase	fig|718251.4.peg.2591	fig|667120.3.peg.3892	fig|67780.5.peg.3258	fig|634503.5.peg.2913	fig|667121.3.peg.1626	fig|500638.4.peg.2036	fig|636.4.peg.2147
ETAE_2786	guaA	Cytoplasmic	GMP synthase, large subunit	fig|718251.4.peg.2599	fig|667120.3.peg.633	fig|67780.5.peg.3209	fig|634503.5.peg.2962	fig|667121.3.peg.1630	fig|500638.4.peg.2039	fig|636.4.peg.2151
ETAE_2788	xseA	Unknown	exodeoxyribonuclease VII large subunit	fig|718251.4.peg.2601	fig|667120.3.peg.631	fig|67780.5.peg.3207	fig|634503.5.peg.2964	fig|667121.3.peg.1844	fig|500638.4.peg.2041	fig|636.4.peg.2153
ETAE_2793	nrfC	Cytoplasmic	formate-dependent nitrite reductase, Fe-S protein	fig|718251.4.peg.2606	fig|667120.3.peg.626	fig|67780.5.peg.3202	fig|634503.5.peg.2969	fig|667121.3.peg.925	fig|500638.4.peg.2046	fig|636.4.peg.2158
ETAE_2794	nrfB	Unknown	formate-dependent nitrite reductase, penta-haeme cytochrome c	fig|718251.4.peg.2607	fig|667120.3.peg.625	fig|67780.5.peg.3201	fig|634503.5.peg.2970	fig|667121.3.peg.926	fig|500638.4.peg.2047	fig|636.4.peg.2159
ETAE_2795	nrfA	Periplasmic	formate-dependent nitrite reductase, periplasmic cytochrome c552 subunit	fig|718251.4.peg.2608	fig|667120.3.peg.624	fig|67780.5.peg.3200	fig|634503.5.peg.2971	fig|667121.3.peg.927	fig|500638.4.peg.2048	fig|636.4.peg.2160
ETAE_2796		Unknown	hypothetical protein	fig|718251.4.peg.2609	fig|667120.3.peg.623	fig|67780.5.peg.3199	fig|634503.5.peg.2972	fig|667121.3.peg.929	fig|500638.4.peg.2050	fig|636.4.peg.2162
ETAE_2797		CytoplasmicMembrane	putative transporter	fig|718251.4.peg.2610	fig|667120.3.peg.622	fig|67780.5.peg.3198	fig|634503.5.peg.2973	fig|667121.3.peg.930	fig|500638.4.peg.2051	fig|636.4.peg.2163
ETAE_2798	engA	Cytoplasmic	GTP-binding protein	fig|718251.4.peg.2611	fig|667120.3.peg.621	fig|67780.5.peg.3197	fig|634503.5.peg.2974	fig|667121.3.peg.931	fig|500638.4.peg.2052	fig|636.4.peg.2164
ETAE_2799	yfgL	Unknown	outer membrane protein assembly complex subunit	fig|718251.4.peg.2612	fig|667120.3.peg.620	fig|67780.5.peg.3196	fig|634503.5.peg.2975	fig|667121.3.peg.932	fig|500638.4.peg.2053	fig|636.4.peg.2165
ETAE_2800		Unknown	hypothetical protein	fig|718251.4.peg.2613	fig|667120.3.peg.619	fig|67780.5.peg.3195	fig|634503.5.peg.2976	fig|667121.3.peg.933	fig|500638.4.peg.2054	fig|636.4.peg.2166
ETAE_2801	hisS	Cytoplasmic	histidyl-tRNA synthetase	fig|718251.4.peg.2614	fig|667120.3.peg.618	fig|67780.5.peg.3194	fig|634503.5.peg.2977	fig|667121.3.peg.934	fig|500638.4.peg.2055	fig|636.4.peg.2167
ETAE_2802	ispG	Cytoplasmic	4-hydroxy-3-methylbut-2-en-1-yl diphosphate synthase	fig|718251.4.peg.2615	fig|667120.3.peg.617	fig|67780.5.peg.3193	fig|634503.5.peg.2978	fig|667121.3.peg.935	fig|500638.4.peg.2056	fig|636.4.peg.2168
ETAE_2805		Cytoplasmic	hypothetical protein	fig|718251.4.peg.2618	fig|667120.3.peg.614	fig|67780.5.peg.3190	fig|634503.5.peg.2981	fig|667121.3.peg.938	fig|500638.4.peg.2060	fig|636.4.peg.2171
ETAE_2806	ndk	Cytoplasmic	nucleoside diphosphate kinase	fig|718251.4.peg.2619	fig|667120.3.peg.613	fig|67780.5.peg.3188	fig|634503.5.peg.2983	fig|667121.3.peg.939	fig|500638.4.peg.2061	fig|636.4.peg.2172
ETAE_2808	pepB	Unknown	aminopeptidase B	fig|718251.4.peg.2621	fig|667120.3.peg.611	fig|67780.5.peg.3186	fig|634503.5.peg.2985	fig|667121.3.peg.941	fig|500638.4.peg.2063	fig|636.4.peg.2174
ETAE_2809		Unknown	hypothetical protein	fig|718251.4.peg.2622	fig|667120.3.peg.610	fig|67780.5.peg.3185	fig|634503.5.peg.2986	fig|667121.3.peg.942	fig|500638.4.peg.2064	fig|636.4.peg.2175
ETAE_2810	fdx	Cytoplasmic	[2FE-2S] ferredoxin, electron carrer protein	fig|718251.4.peg.2623	fig|667120.3.peg.609	fig|67780.5.peg.3184	fig|634503.5.peg.2987	fig|667121.3.peg.943	fig|500638.4.peg.2065	fig|636.4.peg.2176
ETAE_2811	hscA	Cytoplasmic	chaperone protein	fig|718251.4.peg.2624	fig|667120.3.peg.608	fig|67780.5.peg.3183	fig|634503.5.peg.2988	fig|667121.3.peg.944	fig|500638.4.peg.2066	fig|636.4.peg.2177
ETAE_2812	hscB	Unknown	co-chaperone Hsc20	fig|718251.4.peg.2625	fig|667120.3.peg.607	fig|67780.5.peg.3182	fig|634503.5.peg.2989	fig|667121.3.peg.945	fig|500638.4.peg.2067	fig|636.4.peg.2178
ETAE_2813	iscA	Cytoplasmic	iron-sulfur cluster assembly protein	fig|718251.4.peg.2626	fig|667120.3.peg.606	fig|67780.5.peg.3181	fig|634503.5.peg.2990	fig|667121.3.peg.946	fig|500638.4.peg.2068	fig|636.4.peg.2179
ETAE_2814	iscU	Unknown	FeS cluster assembly scaffold	fig|718251.4.peg.2627	fig|667120.3.peg.605	fig|67780.5.peg.3180	fig|634503.5.peg.2991	fig|667121.3.peg.947	fig|500638.4.peg.2069	fig|636.4.peg.2180
ETAE_2815	nifS	Cytoplasmic	cysteine desulfurase	fig|718251.4.peg.2628	fig|667120.3.peg.604	fig|67780.5.peg.3179	fig|634503.5.peg.2992	fig|667121.3.peg.948	fig|500638.4.peg.2070	fig|636.4.peg.2181
ETAE_2816		Cytoplasmic	transcriptional regulator, BadM/Rrf2 family	fig|718251.4.peg.2629	fig|667120.3.peg.603	fig|67780.5.peg.3178	fig|634503.5.peg.2993	fig|667121.3.peg.949	fig|500638.4.peg.2071	fig|636.4.peg.2182
ETAE_2818	lasT	Cytoplasmic	tRNA/rRNA methyltransferase	fig|718251.4.peg.2630	fig|667120.3.peg.602	fig|67780.5.peg.3177	fig|634503.5.peg.2994	fig|667121.3.peg.950	fig|500638.4.peg.2072	fig|636.4.peg.2183
ETAE_2819	suhB	Cytoplasmic	myo-inositol-1(or 4)-monophosphatase	fig|718251.4.peg.2631	fig|667120.3.peg.601	fig|67780.5.peg.3176	fig|634503.5.peg.2995	fig|667121.3.peg.951	fig|500638.4.peg.2073	fig|636.4.peg.2184
ETAE_2821	glyA	Cytoplasmic	glycine hydroxymethyltransferase	fig|718251.4.peg.2633	fig|667120.3.peg.599	fig|67780.5.peg.3173	fig|634503.5.peg.2999	fig|667121.3.peg.953	fig|500638.4.peg.2075	fig|636.4.peg.2186
ETAE_2822	hmpX	Cytoplasmic	nitric oxide dioxygenase	fig|718251.4.peg.2634	fig|667120.3.peg.598	fig|67780.5.peg.3172	fig|634503.5.peg.3000	fig|667121.3.peg.954	fig|500638.4.peg.2076	fig|636.4.peg.2187
ETAE_2823	dnaQ	Cytoplasmic	DNA polymerase III subunit epsilon	fig|718251.4.peg.2635	fig|667120.3.peg.597	fig|67780.5.peg.3170	fig|634503.5.peg.3002	fig|667121.3.peg.1317	fig|500638.4.peg.2077	fig|636.4.peg.2188
ETAE_2824	rnhA	Cytoplasmic	ribonuclease H	fig|718251.4.peg.2636	fig|667120.3.peg.596	fig|67780.5.peg.3169	fig|634503.5.peg.3003	fig|667121.3.peg.1318	fig|500638.4.peg.2078	fig|636.4.peg.2189
ETAE_2825		Unknown	methyltransferase type 11	fig|718251.4.peg.2637	fig|667120.3.peg.595	fig|67780.5.peg.3168	fig|634503.5.peg.3004	fig|667121.3.peg.1319	fig|500638.4.peg.2079	fig|636.4.peg.2190
ETAE_2826	gloB	Cytoplasmic	hydroxyacylglutathione hydrolase	fig|718251.4.peg.2638	fig|667120.3.peg.594	fig|67780.5.peg.3167	fig|634503.5.peg.3005	fig|667121.3.peg.1320	fig|500638.4.peg.2080	fig|636.4.peg.2191
ETAE_2827		Unknown	membrane-bound lytic murein transglycosylase D	fig|718251.4.peg.2639	fig|667120.3.peg.593	fig|67780.5.peg.3166	fig|634503.5.peg.3006	fig|667121.3.peg.1321	fig|500638.4.peg.2081	fig|636.4.peg.2192
ETAE_2828		Unknown	endonuclease/exonuclease/phosphatase	fig|718251.4.peg.2640	fig|667120.3.peg.592	fig|67780.5.peg.3123	fig|634503.5.peg.3008	fig|667121.3.peg.1322	fig|500638.4.peg.2082	fig|636.4.peg.2193
ETAE_2835	pheA	Cytoplasmic	bifunctional chorismate mutase/prephenate dehydratase	fig|718251.4.peg.2647	fig|667120.3.peg.3650	fig|67780.5.peg.1174	fig|634503.5.peg.3014	fig|667121.3.peg.3000	fig|500638.4.peg.500	fig|636.4.peg.1853
ETAE_2836	tyrA	Cytoplasmic	bifunctional chorismate mutase/prephenate dehydrogenase	fig|718251.4.peg.2648	fig|667120.3.peg.3651	fig|67780.5.peg.1175	fig|634503.5.peg.3015	fig|667121.3.peg.3001	fig|500638.4.peg.501	fig|636.4.peg.1852
ETAE_2837	aroF	Cytoplasmic	phospho-2-dehydro-3-deoxyheptonate aldolase	fig|718251.4.peg.2649	fig|667120.3.peg.3652	fig|67780.5.peg.1176	fig|634503.5.peg.3016	fig|667121.3.peg.3002	fig|500638.4.peg.502	fig|636.4.peg.1851
ETAE_2844	dcuB	CytoplasmicMembrane	anaerobic C4-dicarboxylate transporter	fig|718251.4.peg.2655	fig|667120.3.peg.3658	fig|67780.5.peg.1179	fig|634503.5.peg.3020	fig|667121.3.peg.3006	fig|500638.4.peg.506	fig|636.4.peg.1847
ETAE_2846		Unknown	hypothetical protein	fig|718251.4.peg.2657	fig|667120.3.peg.3660	fig|67780.5.peg.1181	fig|634503.5.peg.3022	fig|667121.3.peg.3008	fig|500638.4.peg.579	fig|636.4.peg.1845
ETAE_2847	rplS	Cytoplasmic	ribosomal protein L19	fig|718251.4.peg.2658	fig|667120.3.peg.3661	fig|67780.5.peg.1182	fig|634503.5.peg.3023	fig|667121.3.peg.3009	fig|500638.4.peg.580	fig|636.4.peg.1844
ETAE_2848	trmD	Cytoplasmic	tRNA-(guanine-N1)-methyltransferase	fig|718251.4.peg.2659	fig|667120.3.peg.3662	fig|67780.5.peg.1183	fig|634503.5.peg.3024	fig|667121.3.peg.3010	fig|500638.4.peg.581	fig|636.4.peg.1843
ETAE_2849	rimM	Unknown	16S rRNA-processing protein	fig|718251.4.peg.2660	fig|667120.3.peg.3663	fig|67780.5.peg.1184	fig|634503.5.peg.3025	fig|667121.3.peg.3011	fig|500638.4.peg.582	fig|636.4.peg.1842
ETAE_2850	rpsP	Unknown	30S ribosomal protein S16	fig|718251.4.peg.2661	fig|667120.3.peg.3664	fig|67780.5.peg.1185	fig|634503.5.peg.3026	fig|667121.3.peg.3012	fig|500638.4.peg.583	fig|636.4.peg.1841
ETAE_2851	ffh	Cytoplasmic	signal recognition particle protein	fig|718251.4.peg.2662	fig|667120.3.peg.3665	fig|67780.5.peg.1186	fig|634503.5.peg.3027	fig|667121.3.peg.3013	fig|500638.4.peg.584	fig|636.4.peg.1840
ETAE_2852		CytoplasmicMembrane	cytochrome c assembly protein	fig|718251.4.peg.2663	fig|667120.3.peg.3666	fig|67780.5.peg.1187	fig|634503.5.peg.3028	fig|667121.3.peg.3014	fig|500638.4.peg.585	fig|636.4.peg.1839
ETAE_2853		CytoplasmicMembrane	hypothetical protein	fig|718251.4.peg.2664	fig|667120.3.peg.3667	fig|67780.5.peg.1188	fig|634503.5.peg.3029	fig|667121.3.peg.3015	fig|500638.4.peg.586	fig|636.4.peg.1838
ETAE_2854	luxS	Cytoplasmic	S-ribosylhomocysteinase	fig|718251.4.peg.2665	fig|667120.3.peg.3668	fig|67780.5.peg.1189	fig|634503.5.peg.3030	fig|667121.3.peg.3016	fig|500638.4.peg.587	fig|636.4.peg.1837
ETAE_2855	gshA	OuterMembrane	glutamate--cysteine ligase	fig|718251.4.peg.2666	fig|667120.3.peg.3669	fig|67780.5.peg.1190	fig|634503.5.peg.3031	fig|667121.3.peg.3017	fig|500638.4.peg.588	fig|636.4.peg.1836
ETAE_2856	sdhA	CytoplasmicMembrane	succinate dehydrogenase flavoprotein subunit	fig|718251.4.peg.2667	fig|667120.3.peg.3670	fig|67780.5.peg.1191	fig|634503.5.peg.3032	fig|667121.3.peg.3018	fig|500638.4.peg.589	fig|636.4.peg.1835
ETAE_2857	sdhD	Cytoplasmic	succinate dehydrogenase hydrophobic membrane anchor protein	fig|718251.4.peg.2668	fig|667120.3.peg.3671	fig|67780.5.peg.1192	fig|634503.5.peg.3033	fig|667121.3.peg.3019	fig|500638.4.peg.590	fig|636.4.peg.1834
ETAE_2858	sdhC	Cytoplasmic	succinate dehydrogenase cytochrome b-556 subunit	fig|718251.4.peg.2669	fig|667120.3.peg.1005	fig|67780.5.peg.1196	fig|634503.5.peg.3037	fig|667121.3.peg.1108	fig|500638.4.peg.591	fig|636.4.peg.1527
ETAE_2859	alaS	Cytoplasmic	alanyl-tRNA synthetase	fig|718251.4.peg.2670	fig|667120.3.peg.1004	fig|67780.5.peg.1197	fig|634503.5.peg.3038	fig|667121.3.peg.1107	fig|500638.4.peg.592	fig|636.4.peg.1526
ETAE_2860	recX	Cytoplasmic	regulatory protein	fig|718251.4.peg.2671	fig|667120.3.peg.1002	fig|67780.5.peg.1198	fig|634503.5.peg.3039	fig|667121.3.peg.1106	fig|500638.4.peg.593	fig|636.4.peg.1525
ETAE_2861	recA	Cytoplasmic	RecA/RadA recombinase	fig|718251.4.peg.2672	fig|667120.3.peg.1001	fig|67780.5.peg.1199	fig|634503.5.peg.3040	fig|667121.3.peg.1105	fig|500638.4.peg.594	fig|636.4.peg.1524
ETAE_2862	ygaD	Unknown	competence damage-inducible protein A	fig|718251.4.peg.2673	fig|667120.3.peg.1000	fig|67780.5.peg.1200	fig|634503.5.peg.3041	fig|667121.3.peg.1104	fig|500638.4.peg.595	fig|636.4.peg.1523
ETAE_2866	ybaS	Unknown	glutaminase	fig|718251.4.peg.2677	fig|667120.3.peg.995	fig|67780.5.peg.2971	fig|634503.5.peg.844	fig|667121.3.peg.1101	fig|500638.4.peg.598	fig|636.4.peg.1520
ETAE_2867		CytoplasmicMembrane	amino acid transporter	fig|718251.4.peg.2678	fig|667120.3.peg.994	fig|67780.5.peg.2970	fig|634503.5.peg.845	fig|667121.3.peg.1100	fig|500638.4.peg.599	fig|636.4.peg.1519
ETAE_2868	gadB	Periplasmic	glutamate decarboxylase	fig|718251.4.peg.2679	fig|667120.3.peg.993	fig|67780.5.peg.2969	fig|634503.5.peg.846	fig|667121.3.peg.1099	fig|500638.4.peg.600	fig|636.4.peg.1518
ETAE_2872	mutS	Cytoplasmic	DNA mismatch repair protein	fig|718251.4.peg.2683	fig|667120.3.peg.989	fig|67780.5.peg.2372	fig|634503.5.peg.3048	fig|667121.3.peg.1763	fig|500638.4.peg.604	fig|636.4.peg.1514
ETAE_2873	rpoS	Cytoplasmic	RNA polymerase sigma factor	fig|718251.4.peg.2684	fig|667120.3.peg.988	fig|67780.5.peg.2371	fig|634503.5.peg.3049	fig|667121.3.peg.1762	fig|500638.4.peg.605	fig|636.4.peg.1513
ETAE_2874	nlpD	Unknown	outer membrane lipoprotein	fig|718251.4.peg.2685	fig|667120.3.peg.987	fig|67780.5.peg.2370	fig|634503.5.peg.3050	fig|667121.3.peg.1761	fig|500638.4.peg.606	fig|636.4.peg.1512
ETAE_2875	pcm	Cytoplasmic	protein-L-isoaspartate(D-aspartate) O-methyltransferase	fig|718251.4.peg.2686	fig|667120.3.peg.986	fig|67780.5.peg.2369	fig|634503.5.peg.3051	fig|667121.3.peg.1760	fig|500638.4.peg.607	fig|636.4.peg.1511
ETAE_2876	surE	Cytoplasmic	stationary phase survival protein	fig|718251.4.peg.2687	fig|667120.3.peg.985	fig|67780.5.peg.2368	fig|634503.5.peg.3052	fig|667121.3.peg.1759	fig|500638.4.peg.608	fig|636.4.peg.1510
ETAE_2877	truD	Cytoplasmic	tRNA pseudouridine synthase D	fig|718251.4.peg.2688	fig|667120.3.peg.984	fig|67780.5.peg.2367	fig|634503.5.peg.3053	fig|667121.3.peg.1758	fig|500638.4.peg.609	fig|636.4.peg.1509
ETAE_2878	ispF	Cytoplasmic	2C-methyl-D-erythritol 2,4-cyclodiphosphate synthase	fig|718251.4.peg.2689	fig|667120.3.peg.983	fig|67780.5.peg.2366	fig|634503.5.peg.3054	fig|667121.3.peg.1757	fig|500638.4.peg.610	fig|636.4.peg.1508
ETAE_2879	ispD	Cytoplasmic	2-C-methyl-D-erythritol 4-phosphate cytidylyltransferase	fig|718251.4.peg.2690	fig|667120.3.peg.982	fig|67780.5.peg.2365	fig|634503.5.peg.3055	fig|667121.3.peg.1756	fig|500638.4.peg.611	fig|636.4.peg.1507
ETAE_2881	ptsP	Unknown	phosphoenolpyruvate-protein phosphotransferase PtsP	fig|718251.4.peg.2692	fig|667120.3.peg.980	fig|67780.5.peg.2363	fig|634503.5.peg.3057	fig|667121.3.peg.1754	fig|500638.4.peg.614	fig|636.4.peg.1505
ETAE_2882	ygdP	Unknown	dinucleoside polyphosphate hydrolase	fig|718251.4.peg.2693	fig|667120.3.peg.979	fig|67780.5.peg.2362	fig|634503.5.peg.3058	fig|667121.3.peg.1753	fig|500638.4.peg.615	fig|636.4.peg.1504
ETAE_2885	terC	CytoplasmicMembrane	integral membrane protein	fig|718251.4.peg.2695	fig|667120.3.peg.976	fig|67780.5.peg.2360	fig|634503.5.peg.3060	fig|667121.3.peg.1750	fig|500638.4.peg.618	fig|636.4.peg.1502
ETAE_2887	phoA	Periplasmic	alkaline phosphatase	fig|718251.4.peg.2697	fig|667120.3.peg.974	fig|67780.5.peg.2358	fig|634503.5.peg.3062	fig|667121.3.peg.1748	fig|500638.4.peg.620	fig|636.4.peg.1500
ETAE_2889	aas	CytoplasmicMembrane	bifunctional acyl-[acyl carrier protein] synthetase/2-acylglycerophosphoethanolamine acyltransferase	fig|718251.4.peg.2699	fig|667120.3.peg.972	fig|67780.5.peg.2356	fig|634503.5.peg.3064	fig|667121.3.peg.1746	fig|500638.4.peg.623	fig|636.4.peg.1498
ETAE_2890	galR	Cytoplasmic	DNA-binding transcriptional repressor	fig|718251.4.peg.2700	fig|667120.3.peg.970	fig|67780.5.peg.2355	fig|634503.5.peg.3065	fig|667121.3.peg.3197	fig|500638.4.peg.624	fig|636.4.peg.1497
ETAE_2891		Cytoplasmic	periplasmic binding protein/LacI transcriptional regulator	fig|718251.4.peg.2701	fig|667120.3.peg.969	fig|67780.5.peg.2354	fig|634503.5.peg.3066	fig|667121.3.peg.3196	fig|500638.4.peg.625	fig|636.4.peg.1496
ETAE_2892	hycB	Cytoplasmic	hydrogenase-3, iron-sulfur subunit (part of FHL complex)	fig|718251.4.peg.2702	fig|667120.3.peg.968	fig|67780.5.peg.2353	fig|634503.5.peg.3067	fig|667121.3.peg.3195	fig|500638.4.peg.626	fig|636.4.peg.1495
ETAE_2894	hycD	CytoplasmicMembrane	hydrogenase 3 membrane subunit	fig|718251.4.peg.2704	fig|667120.3.peg.966	fig|67780.5.peg.2351	fig|634503.5.peg.3069	fig|667121.3.peg.3193	fig|500638.4.peg.628	fig|636.4.peg.1493
ETAE_2895	hycE	Unknown	hydrogenase 3 large subunit	fig|718251.4.peg.2705	fig|667120.3.peg.965	fig|67780.5.peg.2350	fig|634503.5.peg.3070	fig|667121.3.peg.3192	fig|500638.4.peg.629	fig|636.4.peg.1492
ETAE_2896	hyfH	Unknown	hydrogenase 4 subunit H	fig|718251.4.peg.2706	fig|667120.3.peg.964	fig|67780.5.peg.2349	fig|634503.5.peg.3071	fig|667121.3.peg.3191	fig|500638.4.peg.630	fig|636.4.peg.1491
ETAE_2897	hycG	Cytoplasmic	hydrogenase activity	fig|718251.4.peg.2707	fig|667120.3.peg.963	fig|67780.5.peg.2348	fig|634503.5.peg.3072	fig|667121.3.peg.3190	fig|500638.4.peg.631	fig|636.4.peg.1490
ETAE_2898	hycH	Cytoplasmic	formate hydrogenlyase maturation	fig|718251.4.peg.2708	fig|667120.3.peg.962	fig|67780.5.peg.2347	fig|634503.5.peg.3073	fig|667121.3.peg.3189	fig|500638.4.peg.632	fig|636.4.peg.1489
ETAE_2899	hycI	Cytoplasmic	hydrogenase 3 maturation protease	fig|718251.4.peg.2709	fig|667120.3.peg.961	fig|67780.5.peg.2346	fig|634503.5.peg.3074	fig|667121.3.peg.3188	fig|500638.4.peg.633	fig|636.4.peg.1488
ETAE_2901		Unknown	pseudogene	fig|718251.4.peg.2710	fig|667120.3.peg.960	fig|67780.5.peg.2345	fig|634503.5.peg.3075	fig|667121.3.peg.3187	fig|500638.4.peg.634	fig|636.4.peg.1487
ETAE_2902	hydN	Cytoplasmic	electron transport protein	fig|718251.4.peg.2711	fig|667120.3.peg.959	fig|67780.5.peg.2344	fig|634503.5.peg.3076	fig|667121.3.peg.3186	fig|500638.4.peg.635	fig|636.4.peg.1486
ETAE_2903	hypF	Unknown	hydrogenase maturation protein HypF	fig|718251.4.peg.2712	fig|667120.3.peg.958	fig|67780.5.peg.2343	fig|634503.5.peg.3077	fig|667121.3.peg.3185	fig|500638.4.peg.636	fig|636.4.peg.1485
ETAE_2904	hypA	Unknown	hydrogenase nickel incorporation protein HypA	fig|718251.4.peg.2713	fig|667120.3.peg.957	fig|67780.5.peg.2342	fig|634503.5.peg.3078	fig|667121.3.peg.3184	fig|500638.4.peg.637	fig|636.4.peg.1484
ETAE_2906	hypC	Cytoplasmic	hydrogenase 2 accessory protein	fig|718251.4.peg.2715	fig|667120.3.peg.955	fig|67780.5.peg.2340	fig|634503.5.peg.3080	fig|667121.3.peg.1008	fig|500638.4.peg.639	fig|636.4.peg.1481
ETAE_2907	hypD	Cytoplasmic	hydrogenase isoenzymes formation protein	fig|718251.4.peg.2716	fig|667120.3.peg.954	fig|67780.5.peg.2339	fig|634503.5.peg.3081	fig|667121.3.peg.1007	fig|500638.4.peg.640	fig|636.4.peg.1480
ETAE_2908	hypE	Cytoplasmic	hydrogenase expression/formation protein	fig|718251.4.peg.2717	fig|667120.3.peg.953	fig|67780.5.peg.2338	fig|634503.5.peg.3082	fig|667121.3.peg.1006	fig|500638.4.peg.641	fig|636.4.peg.1479
ETAE_2909		Unknown	hypothetical protein	fig|718251.4.peg.2718	fig|667120.3.peg.952	fig|67780.5.peg.2337	fig|634503.5.peg.3083	fig|667121.3.peg.1005	fig|500638.4.peg.642	fig|636.4.peg.1478
ETAE_2910	hyfR	Unknown	putative hydrogenlyase transcriptional activator	fig|718251.4.peg.2719	fig|667120.3.peg.951	fig|67780.5.peg.2336	fig|634503.5.peg.3084	fig|667121.3.peg.1004	fig|500638.4.peg.643	fig|636.4.peg.1477
ETAE_2911	lysA	Unknown	diaminopimelate decarboxylase	fig|718251.4.peg.2720	fig|667120.3.peg.950	fig|67780.5.peg.2335	fig|634503.5.peg.3085	fig|667121.3.peg.1003	fig|500638.4.peg.645	fig|636.4.peg.1476
ETAE_2912		Cytoplasmic	transcriptional regulator, LysR family	fig|718251.4.peg.2721	fig|667120.3.peg.949	fig|67780.5.peg.2334	fig|634503.5.peg.3086	fig|667121.3.peg.1002	fig|500638.4.peg.646	fig|636.4.peg.1475
ETAE_2914		Unknown	putative sulfatase	fig|718251.4.peg.2722	fig|667120.3.peg.948	fig|67780.5.peg.2333	fig|634503.5.peg.3087	fig|667121.3.peg.1001	fig|500638.4.peg.647	fig|636.4.peg.1474
ETAE_2915		Unknown	hypothetical protein	fig|718251.4.peg.2723	fig|667120.3.peg.947	fig|67780.5.peg.2332	fig|634503.5.peg.3088	fig|667121.3.peg.1000	fig|500638.4.peg.648	fig|636.4.peg.1473
ETAE_2916		OuterMembrane	hypothetical protein	fig|718251.4.peg.2724	fig|667120.3.peg.946	fig|67780.5.peg.2331	fig|634503.5.peg.3089	fig|667121.3.peg.999	fig|500638.4.peg.649	fig|636.4.peg.1472
ETAE_2917		Unknown	hypothetical protein	fig|718251.4.peg.2725	fig|667120.3.peg.945	fig|67780.5.peg.2330	fig|634503.5.peg.3090	fig|667121.3.peg.998	fig|500638.4.peg.650	fig|636.4.peg.1471
ETAE_2918		OuterMembrane	hypothetical chondroitinase	fig|718251.4.peg.2726	fig|667120.3.peg.944	fig|67780.5.peg.2329	fig|634503.5.peg.3091	fig|667121.3.peg.997	fig|500638.4.peg.651	fig|636.4.peg.1470
ETAE_2920		CytoplasmicMembrane	lipid A biosynthesis palmitoleoyl acyltransferase	fig|718251.4.peg.2727	fig|667120.3.peg.942	fig|67780.5.peg.2327	fig|634503.5.peg.3093	fig|667121.3.peg.996	fig|500638.4.peg.652	fig|636.4.peg.1469
ETAE_2921		Unknown	outer membrane lipoprotein	fig|718251.4.peg.2728	fig|667120.3.peg.941	fig|67780.5.peg.2324	fig|634503.5.peg.3096	fig|667121.3.peg.995	fig|500638.4.peg.653	fig|636.4.peg.1468
ETAE_2922		Unknown	hypothetical protein	fig|718251.4.peg.2729	fig|667120.3.peg.940	fig|67780.5.peg.2323	fig|634503.5.peg.3097	fig|667121.3.peg.994	fig|500638.4.peg.654	fig|636.4.peg.1467
ETAE_2924	lysS	Cytoplasmic	lysyl-tRNA synthetase	fig|718251.4.peg.2731	fig|667120.3.peg.937	fig|67780.5.peg.1717	fig|634503.5.peg.3123	fig|667121.3.peg.992	fig|500638.4.peg.656	fig|636.4.peg.1464
ETAE_2925	prfB	Cytoplasmic	protein chain release factor B	fig|718251.4.peg.2732	fig|667120.3.peg.936	fig|67780.5.peg.1716	fig|634503.5.peg.3124	fig|667121.3.peg.991	fig|500638.4.peg.508	fig|636.4.peg.1463
ETAE_2927	recJ	Cytoplasmic	ssDNA exonuclease RecJ	fig|718251.4.peg.2734	fig|667120.3.peg.934	fig|67780.5.peg.1714	fig|634503.5.peg.3126	fig|667121.3.peg.990	fig|500638.4.peg.509	fig|636.4.peg.1462
ETAE_2928	dsbC	Periplasmic	thiol:disulfide interchange protein	fig|718251.4.peg.2735	fig|667120.3.peg.933	fig|67780.5.peg.1713	fig|634503.5.peg.3127	fig|667121.3.peg.989	fig|500638.4.peg.510	fig|636.4.peg.1461
ETAE_2929	xerD	Unknown	site-specific tyrosine recombinase	fig|718251.4.peg.2736	fig|667120.3.peg.932	fig|67780.5.peg.1712	fig|634503.5.peg.3128	fig|667121.3.peg.988	fig|500638.4.peg.511	fig|636.4.peg.1460
ETAE_2930	fldB	Unknown	flavodoxin	fig|718251.4.peg.2737	fig|667120.3.peg.931	fig|67780.5.peg.1711	fig|634503.5.peg.3129	fig|667121.3.peg.987	fig|500638.4.peg.512	fig|636.4.peg.1459
ETAE_2931		Unknown	hypothetical protein	fig|718251.4.peg.2738	fig|667120.3.peg.930	fig|67780.5.peg.1710	fig|634503.5.peg.3130	fig|667121.3.peg.986	fig|500638.4.peg.513	fig|636.4.peg.1458
ETAE_2932		Cytoplasmic	hypothetical protein	fig|718251.4.peg.2739	fig|667120.3.peg.929	fig|67780.5.peg.1709	fig|634503.5.peg.3131	fig|667121.3.peg.985	fig|500638.4.peg.514	fig|636.4.peg.1457
ETAE_2933		Unknown	glycine cleavage T protein	fig|718251.4.peg.2740	fig|667120.3.peg.928	fig|67780.5.peg.1708	fig|634503.5.peg.3132	fig|667121.3.peg.984	fig|500638.4.peg.515	fig|636.4.peg.1456
ETAE_2934	aroE	Unknown	shikimate 5-dehydrogenase	fig|718251.4.peg.2741	fig|667120.3.peg.927	fig|67780.5.peg.1707	fig|634503.5.peg.3133	fig|667121.3.peg.983	fig|500638.4.peg.516	fig|636.4.peg.1455
ETAE_2935	tsx	OuterMembrane	nucleoside-specific channel-forming protein Tsx	fig|718251.4.peg.2742	fig|667120.3.peg.926	fig|67780.5.peg.1705	fig|634503.5.peg.3135	fig|667121.3.peg.982	fig|500638.4.peg.517	fig|636.4.peg.1454
ETAE_2937		CytoplasmicMembrane	channel protein, hemolysin III family	fig|718251.4.peg.2743	fig|667120.3.peg.924	fig|67780.5.peg.1704	fig|634503.5.peg.3136	fig|667121.3.peg.981	fig|500638.4.peg.518	fig|636.4.peg.1453
ETAE_2938		CytoplasmicMembrane	alanine or glycine:cation symporter, AGCS family	fig|718251.4.peg.2744	fig|667120.3.peg.923	fig|67780.5.peg.1703	fig|634503.5.peg.3137	fig|667121.3.peg.980	fig|500638.4.peg.519	fig|636.4.peg.1452
ETAE_2939	gcvP	Cytoplasmic	glycine dehydrogenase	fig|718251.4.peg.2745	fig|667120.3.peg.921	fig|67780.5.peg.1702	fig|634503.5.peg.3138	fig|667121.3.peg.979	fig|500638.4.peg.520	fig|636.4.peg.1451
ETAE_2940	gcvH	Cytoplasmic	glycine cleavage system protein H	fig|718251.4.peg.2746	fig|667120.3.peg.920	fig|67780.5.peg.1701	fig|634503.5.peg.3139	fig|667121.3.peg.978	fig|500638.4.peg.521	fig|636.4.peg.1450
ETAE_2941	gcvT	Cytoplasmic	glycine cleavage system aminomethyltransferase T	fig|718251.4.peg.2747	fig|667120.3.peg.919	fig|67780.5.peg.1700	fig|634503.5.peg.3140	fig|667121.3.peg.977	fig|500638.4.peg.522	fig|636.4.peg.1449
ETAE_2943		Unknown	hypothetical protein	fig|718251.4.peg.2749	fig|667120.3.peg.917	fig|67780.5.peg.1699	fig|634503.5.peg.3141	fig|667121.3.peg.975	fig|500638.4.peg.524	fig|636.4.peg.1448
ETAE_2944	ubiH	Unknown	2-octaprenyl-6-methoxyphenyl hydroxylase	fig|718251.4.peg.2750	fig|667120.3.peg.916	fig|67780.5.peg.1698	fig|634503.5.peg.3142	fig|667121.3.peg.974	fig|500638.4.peg.525	fig|636.4.peg.1447
ETAE_2945		Cytoplasmic	putative peptidase M24	fig|718251.4.peg.2751	fig|667120.3.peg.915	fig|67780.5.peg.1697	fig|634503.5.peg.3143	fig|667121.3.peg.973	fig|500638.4.peg.526	fig|636.4.peg.1446
ETAE_2946		Unknown	hypothetical protein	fig|718251.4.peg.2752	fig|667120.3.peg.913	fig|67780.5.peg.1696	fig|634503.5.peg.3144	fig|667121.3.peg.972	fig|500638.4.peg.527	fig|636.4.peg.1445
ETAE_2947		Cytoplasmic	Z-ring-associated protein	fig|718251.4.peg.2753	fig|667120.3.peg.912	fig|67780.5.peg.1695	fig|634503.5.peg.3145	fig|667121.3.peg.971	fig|500638.4.peg.528	fig|636.4.peg.1444
ETAE_2949	serA	Cytoplasmic	D-3-phosphoglycerate dehydrogenase	fig|718251.4.peg.2755	fig|667120.3.peg.910	fig|67780.5.peg.1693	fig|634503.5.peg.3147	fig|667121.3.peg.969	fig|500638.4.peg.530	fig|636.4.peg.1442
ETAE_2950	rpiA	Unknown	ribose-5-phosphate isomerase A	fig|718251.4.peg.2756	fig|667120.3.peg.909	fig|67780.5.peg.1692	fig|634503.5.peg.3148	fig|667121.3.peg.968	fig|500638.4.peg.531	fig|636.4.peg.1441
ETAE_2951		Cytoplasmic	Chromosome initiation inhibitor (OriC replication inhibitor)	fig|718251.4.peg.2757	fig|667120.3.peg.908	fig|67780.5.peg.1691	fig|634503.5.peg.3149	fig|667121.3.peg.967	fig|500638.4.peg.532	fig|636.4.peg.1440
ETAE_2952		Periplasmic	hypothetical protein	fig|718251.4.peg.2758	fig|667120.3.peg.907	fig|67780.5.peg.1690	fig|634503.5.peg.3150	fig|667121.3.peg.966	fig|500638.4.peg.533	fig|636.4.peg.1439
ETAE_2954		CytoplasmicMembrane	small conductance mechanosensitive ion channel, MscS family	fig|718251.4.peg.2760	fig|667120.3.peg.905	fig|67780.5.peg.1688	fig|634503.5.peg.3152	fig|667121.3.peg.964	fig|500638.4.peg.535	fig|636.4.peg.1437
ETAE_2956	fbaA	Unknown	fructose-bisphosphate aldolase	fig|718251.4.peg.2761	fig|667120.3.peg.903	fig|67780.5.peg.1687	fig|634503.5.peg.3153	fig|667121.3.peg.963	fig|500638.4.peg.536	fig|636.4.peg.1436
ETAE_2957	pgk	Cytoplasmic	phosphoglycerate kinase	fig|718251.4.peg.2762	fig|667120.3.peg.902	fig|67780.5.peg.1686	fig|634503.5.peg.3154	fig|667121.3.peg.962	fig|500638.4.peg.537	fig|636.4.peg.1435
ETAE_2958	epd	Cytoplasmic	D-erythrose 4-phosphate dehydrogenase	fig|718251.4.peg.2763	fig|667120.3.peg.901	fig|67780.5.peg.1685	fig|634503.5.peg.3155	fig|667121.3.peg.961	fig|500638.4.peg.538	fig|636.4.peg.1434
ETAE_2959	tktA	Cytoplasmic	transketolase	fig|718251.4.peg.2764	fig|667120.3.peg.900	fig|67780.5.peg.1684	fig|634503.5.peg.3156	fig|667121.3.peg.960	fig|500638.4.peg.539	fig|636.4.peg.1433
ETAE_2962	speB	Cytoplasmic	agmatinase	fig|718251.4.peg.2767	fig|667120.3.peg.897	fig|67780.5.peg.1681	fig|634503.5.peg.3159	fig|667121.3.peg.1282	fig|500638.4.peg.541	fig|636.4.peg.1431
ETAE_2963	speA	Periplasmic	arginine decarboxylase	fig|718251.4.peg.2768	fig|667120.3.peg.896	fig|67780.5.peg.1680	fig|634503.5.peg.3160	fig|667121.3.peg.1283	fig|500638.4.peg.542	fig|636.4.peg.1430
ETAE_2964	metK	Cytoplasmic	S-adenosylmethionine synthetase	fig|718251.4.peg.2770	fig|667120.3.peg.893	fig|67780.5.peg.1678	fig|634503.5.peg.3161	fig|667121.3.peg.1285	fig|500638.4.peg.544	fig|636.4.peg.1427
ETAE_2966		CytoplasmicMembrane	sugar transporter	fig|718251.4.peg.2771	fig|667120.3.peg.892	fig|67780.5.peg.1677	fig|634503.5.peg.3162	fig|667121.3.peg.1292	fig|500638.4.peg.545	fig|636.4.peg.1426
ETAE_2967		Cytoplasmic	peptidase PmbA	fig|718251.4.peg.2772	fig|667120.3.peg.891	fig|67780.5.peg.1676	fig|634503.5.peg.3163	fig|667121.3.peg.1291	fig|500638.4.peg.546	fig|636.4.peg.1425
ETAE_2968	hns	Cytoplasmic	global DNA-binding transcriptional dual regulator H-NS	fig|718251.4.peg.2773	fig|667120.3.peg.890	fig|67780.5.peg.1675	fig|634503.5.peg.3164	fig|667121.3.peg.1290	fig|500638.4.peg.548	fig|636.4.peg.1424
ETAE_2970		Cytoplasmic	hypothetical protein	fig|718251.4.peg.2775	fig|667120.3.peg.888	fig|67780.5.peg.1673	fig|634503.5.peg.3166	fig|667121.3.peg.1289	fig|500638.4.peg.549	fig|636.4.peg.1423
ETAE_2975		CytoplasmicMembrane	hypothetical protein	fig|718251.4.peg.2779	fig|667120.3.peg.883	fig|67780.5.peg.1669	fig|634503.5.peg.3170	fig|667121.3.peg.62	fig|500638.4.peg.553	fig|636.4.peg.680
ETAE_2976		CytoplasmicMembrane	hypothetical protein	fig|718251.4.peg.2780	fig|667120.3.peg.882	fig|67780.5.peg.1668	fig|634503.5.peg.3171	fig|667121.3.peg.63	fig|500638.4.peg.554	fig|636.4.peg.679
ETAE_2977	dctP	Periplasmic	C4-dicarboxylate-binding protein DctP	fig|718251.4.peg.2781	fig|667120.3.peg.881	fig|67780.5.peg.1667	fig|634503.5.peg.3172	fig|667121.3.peg.64	fig|500638.4.peg.555	fig|636.4.peg.678
ETAE_2978		Cytoplasmic	putative dicarboxylate-binding periplasmic protein	fig|718251.4.peg.2782	fig|667120.3.peg.880	fig|67780.5.peg.1666	fig|634503.5.peg.3173	fig|667121.3.peg.66	fig|500638.4.peg.556	fig|636.4.peg.677
ETAE_2979		Cytoplasmic	adenosine deaminase	fig|718251.4.peg.2783	fig|667120.3.peg.879	fig|67780.5.peg.1665	fig|634503.5.peg.3174	fig|667121.3.peg.67	fig|500638.4.peg.557	fig|636.4.peg.676
ETAE_2980		CytoplasmicMembrane	anaerobic c4-dicarboxylate antiporter, DcuC family	fig|718251.4.peg.2784	fig|667120.3.peg.878	fig|67780.5.peg.1664	fig|634503.5.peg.3175	fig|667121.3.peg.68	fig|500638.4.peg.558	fig|636.4.peg.675
ETAE_2982	udp	Cytoplasmic	probable uridine phosphorylase	fig|718251.4.peg.2786	fig|667120.3.peg.876	fig|67780.5.peg.1662	fig|634503.5.peg.3177	fig|667121.3.peg.70	fig|500638.4.peg.560	fig|636.4.peg.673
ETAE_2983		CytoplasmicMembrane	putative membrane transport protein	fig|718251.4.peg.2787	fig|667120.3.peg.875	fig|67780.5.peg.1661	fig|634503.5.peg.3178	fig|667121.3.peg.71	fig|500638.4.peg.561	fig|636.4.peg.672
ETAE_2990		Cytoplasmic	cyclopropane-fatty-acyl-phospholipid synthase	fig|718251.4.peg.2794	fig|667120.3.peg.864	fig|67780.5.peg.1658	fig|634503.5.peg.3181	fig|667121.3.peg.1508	fig|500638.4.peg.566	fig|636.4.peg.666
ETAE_2991		Unknown	hypothetical protein	fig|718251.4.peg.2795	fig|667120.3.peg.863	fig|67780.5.peg.1657	fig|634503.5.peg.3182	fig|667121.3.peg.1509	fig|500638.4.peg.567	fig|636.4.peg.665
ETAE_2992		CytoplasmicMembrane	hypothetical protein	fig|718251.4.peg.2796	fig|667120.3.peg.862	fig|67780.5.peg.1656	fig|634503.5.peg.3183	fig|667121.3.peg.1510	fig|500638.4.peg.568	fig|636.4.peg.664
ETAE_2993	cydB	CytoplasmicMembrane	cytochrome oxidase subunit II	fig|718251.4.peg.2797	fig|667120.3.peg.861	fig|67780.5.peg.1655	fig|634503.5.peg.3184	fig|667121.3.peg.1511	fig|500638.4.peg.569	fig|636.4.peg.663
ETAE_2994	cydA	CytoplasmicMembrane	cytochrome oxidase subunit I	fig|718251.4.peg.2798	fig|667120.3.peg.860	fig|67780.5.peg.1654	fig|634503.5.peg.3185	fig|667121.3.peg.1122	fig|500638.4.peg.570	fig|636.4.peg.662
ETAE_2995		Cytoplasmic	rubredoxin-type Fe(Cys)4 protein	fig|718251.4.peg.2800	fig|667120.3.peg.859	fig|67780.5.peg.1653	fig|634503.5.peg.3186	fig|667121.3.peg.1123	fig|500638.4.peg.571	fig|636.4.peg.661
ETAE_2996	hyaF	Cytoplasmic	hydrogenase-1 operon protein	fig|718251.4.peg.2801	fig|667120.3.peg.858	fig|67780.5.peg.1652	fig|634503.5.peg.3187	fig|667121.3.peg.1124	fig|500638.4.peg.572	fig|636.4.peg.660
ETAE_2997	hyaE	Cytoplasmic	hydrogenase-1 operon protein	fig|718251.4.peg.2802	fig|667120.3.peg.857	fig|67780.5.peg.1651	fig|634503.5.peg.3188	fig|667121.3.peg.1125	fig|500638.4.peg.573	fig|636.4.peg.659
ETAE_2998	hyaD	Cytoplasmic	hydrogenase 1 maturation protease	fig|718251.4.peg.2803	fig|667120.3.peg.856	fig|67780.5.peg.1650	fig|634503.5.peg.3189	fig|667121.3.peg.1126	fig|500638.4.peg.574	fig|636.4.peg.658
ETAE_2999	hyaC	CytoplasmicMembrane	hydrogenase 1 b-type cytochrome subunit	fig|718251.4.peg.2804	fig|667120.3.peg.855	fig|67780.5.peg.1649	fig|634503.5.peg.3190	fig|667121.3.peg.1127	fig|500638.4.peg.575	fig|636.4.peg.657
ETAE_3000	hyaB	Periplasmic	hydrogenase 1 large subunit	fig|718251.4.peg.2805	fig|667120.3.peg.854	fig|67780.5.peg.1648	fig|634503.5.peg.3191	fig|667121.3.peg.1128	fig|500638.4.peg.576	fig|636.4.peg.656
ETAE_3001	hyaA	Periplasmic	hydrogenase-1 small subunit	fig|718251.4.peg.2807	fig|667120.3.peg.853	fig|67780.5.peg.1647	fig|634503.5.peg.3192	fig|667121.3.peg.1129	fig|500638.4.peg.577	fig|636.4.peg.655
ETAE_3007	rpiB	Unknown	ribose 5-phosphate isomerase	fig|718251.4.peg.2812	fig|667120.3.peg.2271	fig|67780.5.peg.1642	fig|634503.5.peg.3197	fig|667121.3.peg.2530	fig|500638.4.peg.2934	fig|636.4.peg.2497
ETAE_3011	melA	Cytoplasmic	alpha-galactosidases/6-phospho-beta-glucosidase	fig|718251.4.peg.2816	fig|667120.3.peg.2267	fig|67780.5.peg.1635	fig|634503.5.peg.3204	fig|667121.3.peg.2534	fig|500638.4.peg.2930	fig|636.4.peg.2493
ETAE_3012	araH	CytoplasmicMembrane	ribose/xylose/arabinose/galactoside ABC-type transport system, permease component	fig|718251.4.peg.2817	fig|667120.3.peg.2266	fig|67780.5.peg.1634	fig|634503.5.peg.3205	fig|667121.3.peg.2535	fig|500638.4.peg.2929	fig|636.4.peg.2492
ETAE_3013		CytoplasmicMembrane	ABC-type sugar transport system, ATPase component	fig|718251.4.peg.2818	fig|667120.3.peg.2265	fig|67780.5.peg.1633	fig|634503.5.peg.3206	fig|667121.3.peg.2536	fig|500638.4.peg.2928	fig|636.4.peg.2491
ETAE_3014		Unknown	hypothetical protein	fig|718251.4.peg.2819	fig|667120.3.peg.2264	fig|67780.5.peg.1632	fig|634503.5.peg.3207	fig|667121.3.peg.2537	fig|500638.4.peg.2927	fig|636.4.peg.2490
ETAE_3016		Unknown	hypothetical protein	fig|718251.4.peg.2820	fig|667120.3.peg.2262	fig|67780.5.peg.1630	fig|634503.5.peg.3209	fig|667121.3.peg.2538	fig|500638.4.peg.2926	fig|636.4.peg.2489
ETAE_3017		Unknown	hypothetical protein	fig|718251.4.peg.2821	fig|667120.3.peg.2261	fig|67780.5.peg.1629	fig|634503.5.peg.3210	fig|667121.3.peg.2539	fig|500638.4.peg.2925	fig|636.4.peg.2488
ETAE_3095	yaiH	Periplasmic	beta-lactamase/D-alanine carboxypeptidase	fig|718251.4.peg.2872	fig|667120.3.peg.2339	fig|67780.5.peg.1604	fig|634503.5.peg.3237	fig|667121.3.peg.2662	fig|500638.4.peg.2884	fig|636.4.peg.2458
ETAE_3096	lptG	CytoplasmicMembrane	lipopolysaccharide export system permease protein	fig|718251.4.peg.2873	fig|667120.3.peg.2338	fig|67780.5.peg.1603	fig|634503.5.peg.3238	fig|667121.3.peg.2663	fig|500638.4.peg.2883	fig|636.4.peg.2457
ETAE_3097	lptF	CytoplasmicMembrane	lipopolysaccharide export system permease protein	fig|718251.4.peg.2874	fig|667120.3.peg.2337	fig|67780.5.peg.1602	fig|634503.5.peg.3239	fig|667121.3.peg.1926	fig|500638.4.peg.2882	fig|636.4.peg.2456
ETAE_3098	pepA	Cytoplasmic	leucyl aminopeptidase	fig|718251.4.peg.2875	fig|667120.3.peg.2335	fig|67780.5.peg.1601	fig|634503.5.peg.3240	fig|667121.3.peg.1925	fig|500638.4.peg.2881	fig|636.4.peg.2455
ETAE_3099	holC	Unknown	DNA polymerase III subunit chi	fig|718251.4.peg.2876	fig|667120.3.peg.2334	fig|67780.5.peg.1600	fig|634503.5.peg.3241	fig|667121.3.peg.1924	fig|500638.4.peg.2880	fig|636.4.peg.2454
ETAE_3100	valS	Cytoplasmic	valyl-tRNA synthetase	fig|718251.4.peg.2877	fig|667120.3.peg.2333	fig|67780.5.peg.1599	fig|634503.5.peg.3242	fig|667121.3.peg.1923	fig|500638.4.peg.2879	fig|636.4.peg.2453
ETAE_3102	ssuC	CytoplasmicMembrane	sulfonate/nitrate/taurine transport system permease protein	fig|718251.4.peg.2878	fig|667120.3.peg.2332	fig|67780.5.peg.2242	fig|634503.5.peg.3243	fig|667121.3.peg.1922	fig|500638.4.peg.2878	fig|636.4.peg.2452
ETAE_3103	ssuB	Cytoplasmic	sulfonate/nitrate/taurine transport system ATP-binding protein	fig|718251.4.peg.2879	fig|667120.3.peg.2331	fig|67780.5.peg.2243	fig|634503.5.peg.3244	fig|667121.3.peg.1921	fig|500638.4.peg.2877	fig|636.4.peg.2451
ETAE_3104		Cytoplasmic	putative acetyltransferase	fig|718251.4.peg.2880	fig|667120.3.peg.2330	fig|67780.5.peg.2244	fig|634503.5.peg.3245	fig|667121.3.peg.1920	fig|500638.4.peg.2876	fig|636.4.peg.2450
ETAE_3111	argI	Cytoplasmic	ornithine carbamoyltransferase subunit I	fig|718251.4.peg.2887	fig|667120.3.peg.2323	fig|67780.5.peg.2246	fig|634503.5.peg.3247	fig|667121.3.peg.1918	fig|500638.4.peg.2874	fig|636.4.peg.2448
ETAE_3112		Unknown	hypothetical protein	fig|718251.4.peg.2888	fig|667120.3.peg.2322	fig|67780.5.peg.2247	fig|634503.5.peg.3248	fig|667121.3.peg.1917	fig|500638.4.peg.2873	fig|636.4.peg.2447
ETAE_3113	glpC	Cytoplasmic	sn-glycerol-3-phosphate dehydrogenase subunit C	fig|718251.4.peg.2889	fig|667120.3.peg.2321	fig|67780.5.peg.2248	fig|634503.5.peg.3249	fig|667121.3.peg.1916	fig|500638.4.peg.2872	fig|636.4.peg.2446
ETAE_3114	glpB	Cytoplasmic	anaerobic glycerol-3-phosphate dehydrogenase subunit B	fig|718251.4.peg.2890	fig|667120.3.peg.2320	fig|67780.5.peg.2249	fig|634503.5.peg.3250	fig|667121.3.peg.1915	fig|500638.4.peg.2871	fig|636.4.peg.2445
ETAE_3115	glpA	Cytoplasmic	sn-glycerol-3-phosphate dehydrogenase subunit A	fig|718251.4.peg.2891	fig|667120.3.peg.2319	fig|67780.5.peg.2250	fig|634503.5.peg.3251	fig|667121.3.peg.1914	fig|500638.4.peg.2870	fig|636.4.peg.2444
ETAE_3116	glpT	CytoplasmicMembrane	sn-glycerol-3-phosphate transporter	fig|718251.4.peg.2892	fig|667120.3.peg.2318	fig|67780.5.peg.2251	fig|634503.5.peg.3252	fig|667121.3.peg.1913	fig|500638.4.peg.2869	fig|636.4.peg.2443
ETAE_3117	glpQ	Periplasmic	glycerophosphoryl diester phosphodiesterase	fig|718251.4.peg.2893	fig|667120.3.peg.2317	fig|67780.5.peg.2252	fig|634503.5.peg.3253	fig|667121.3.peg.1912	fig|500638.4.peg.2868	fig|636.4.peg.2442
ETAE_3119		Cytoplasmic	glutathione S-transferase domain protein	fig|718251.4.peg.2895	fig|667120.3.peg.2315	fig|67780.5.peg.2254	fig|634503.5.peg.3255	fig|667121.3.peg.1911	fig|500638.4.peg.2867	fig|636.4.peg.2441
ETAE_3120	selA	Cytoplasmic	selenocysteine synthase	fig|718251.4.peg.2896	fig|667120.3.peg.2314	fig|67780.5.peg.2255	fig|634503.5.peg.3256	fig|667121.3.peg.1910	fig|500638.4.peg.2866	fig|636.4.peg.2440
ETAE_3121	selB	Cytoplasmic	selenocysteinyl-tRNA-specific translation factor	fig|718251.4.peg.2897	fig|667120.3.peg.2313	fig|67780.5.peg.2256	fig|634503.5.peg.3257	fig|667121.3.peg.1909	fig|500638.4.peg.2865	fig|636.4.peg.2439
ETAE_3122	kch	CytoplasmicMembrane	voltage-gated potassium channel	fig|718251.4.peg.2898	fig|667120.3.peg.2312	fig|67780.5.peg.2258	fig|634503.5.peg.3259	fig|667121.3.peg.1907	fig|500638.4.peg.2863	fig|636.4.peg.2437
ETAE_3123		Unknown	hypothetical protein	fig|718251.4.peg.2899	fig|667120.3.peg.2311	fig|67780.5.peg.2259	fig|634503.5.peg.3260	fig|667121.3.peg.1906	fig|500638.4.peg.2862	fig|636.4.peg.2436
ETAE_3124	pyrI	Cytoplasmic	aspartate carbamoyltransferase regulatory subunit	fig|718251.4.peg.2900	fig|667120.3.peg.2310	fig|67780.5.peg.2260	fig|634503.5.peg.3261	fig|667121.3.peg.1905	fig|500638.4.peg.2861	fig|636.4.peg.2435
ETAE_3125	pyrB	Cytoplasmic	aspartate carbamoyltransferase	fig|718251.4.peg.2901	fig|667120.3.peg.2309	fig|67780.5.peg.2261	fig|634503.5.peg.3262	fig|667121.3.peg.1904	fig|500638.4.peg.2860	fig|636.4.peg.2434
ETAE_3127		OuterMembrane	p-hydroxybenzoic acid efflux subunit AaeA	fig|718251.4.peg.2903	fig|667120.3.peg.2307	fig|67780.5.peg.2264	fig|634503.5.peg.3265	fig|667121.3.peg.1901	fig|500638.4.peg.2857	fig|636.4.peg.2431
ETAE_3129		Cytoplasmic	putative DNA-binding transcriptional regulator	fig|718251.4.peg.2905	fig|667120.3.peg.2305	fig|67780.5.peg.2267	fig|634503.5.peg.3267	fig|667121.3.peg.1899	fig|500638.4.peg.2855	fig|636.4.peg.2429
ETAE_3130		Cytoplasmic	peptidase U62 modulator of DNA gyrase	fig|718251.4.peg.2906	fig|667120.3.peg.2304	fig|67780.5.peg.2268	fig|634503.5.peg.3268	fig|667121.3.peg.1898	fig|500638.4.peg.2854	fig|636.4.peg.2428
ETAE_3132		OuterMembrane	putative exported protein	fig|718251.4.peg.2908	fig|667120.3.peg.2302	fig|67780.5.peg.2270	fig|634503.5.peg.3270	fig|667121.3.peg.1896	fig|500638.4.peg.2852	fig|636.4.peg.2426
ETAE_3133	cafA	Cytoplasmic	ribonuclease G	fig|718251.4.peg.2909	fig|667120.3.peg.2301	fig|67780.5.peg.2271	fig|634503.5.peg.3271	fig|667121.3.peg.1895	fig|500638.4.peg.2851	fig|636.4.peg.2425
ETAE_3134	maf	Cytoplasmic	Maf-like protein	fig|718251.4.peg.2910	fig|667120.3.peg.2300	fig|67780.5.peg.2272	fig|634503.5.peg.3272	fig|667121.3.peg.1894	fig|500638.4.peg.2850	fig|636.4.peg.2424
ETAE_3135	mreD	CytoplasmicMembrane	rod shape-determining protein	fig|718251.4.peg.2911	fig|667120.3.peg.2299	fig|67780.5.peg.2273	fig|634503.5.peg.3273	fig|667121.3.peg.1893	fig|500638.4.peg.2849	fig|636.4.peg.2423
ETAE_3136	mreC	Unknown	cell wall structural complex MreBCD transmembrane component	fig|718251.4.peg.2912	fig|667120.3.peg.2298	fig|67780.5.peg.2274	fig|634503.5.peg.3274	fig|667121.3.peg.1892	fig|500638.4.peg.2848	fig|636.4.peg.2422
ETAE_3137	mreB	Cytoplasmic	regulator of ftsI, penicillin binding protein 3, septation function	fig|718251.4.peg.2913	fig|667120.3.peg.2297	fig|67780.5.peg.2275	fig|634503.5.peg.3275	fig|667121.3.peg.1891	fig|500638.4.peg.2847	fig|636.4.peg.2421
ETAE_3138	csrD	Cytoplasmic	regulatory protein	fig|718251.4.peg.2914	fig|667120.3.peg.2296	fig|67780.5.peg.2276	fig|634503.5.peg.3276	fig|667121.3.peg.1890	fig|500638.4.peg.2846	fig|636.4.peg.2420
ETAE_3141		Cytoplasmic	probable zinc-binding dehydrogenase	fig|718251.4.peg.2917	fig|667120.3.peg.2293	fig|67780.5.peg.2278	fig|634503.5.peg.3278	fig|667121.3.peg.1889	fig|500638.4.peg.2845	fig|636.4.peg.2419
ETAE_3142		Unknown	oxidoreductase molybdopterin binding	fig|718251.4.peg.2918	fig|667120.3.peg.2292	fig|67780.5.peg.2280	fig|634503.5.peg.3279	fig|667121.3.peg.1888	fig|500638.4.peg.2843	fig|636.4.peg.2418
ETAE_3144	aroQ	Unknown	3-dehydroquinate dehydratase II	fig|718251.4.peg.2920	fig|667120.3.peg.2290	fig|67780.5.peg.2282	fig|634503.5.peg.3281	fig|667121.3.peg.1886	fig|500638.4.peg.2841	fig|636.4.peg.2416
ETAE_3145	accB	Unknown	acetyl-CoA carboxylase biotin carboxyl carrier protein subunit	fig|718251.4.peg.2921	fig|667120.3.peg.2289	fig|67780.5.peg.2283	fig|634503.5.peg.3282	fig|667121.3.peg.1885	fig|500638.4.peg.2840	fig|636.4.peg.2415
ETAE_3146	accC	Cytoplasmic	acetyl-CoA carboxylase biotin carboxylase subunit	fig|718251.4.peg.2922	fig|667120.3.peg.2288	fig|67780.5.peg.2284	fig|634503.5.peg.3283	fig|667121.3.peg.1884	fig|500638.4.peg.2839	fig|636.4.peg.2414
ETAE_3147		Unknown	hypothetical protein	fig|718251.4.peg.2923	fig|667120.3.peg.2287	fig|67780.5.peg.2285	fig|634503.5.peg.3284	fig|667121.3.peg.1883	fig|500638.4.peg.2838	fig|636.4.peg.2413
ETAE_3148	panF	CytoplasmicMembrane	sodium/panthothenate symporter	fig|718251.4.peg.2924	fig|667120.3.peg.2286	fig|67780.5.peg.2286	fig|634503.5.peg.3285	fig|667121.3.peg.1882	fig|500638.4.peg.2837	fig|636.4.peg.2412
ETAE_3149	prmA	Cytoplasmic	ribosomal protein L11 methyltransferase	fig|718251.4.peg.2925	fig|667120.3.peg.2285	fig|67780.5.peg.2287	fig|634503.5.peg.3286	fig|667121.3.peg.1881	fig|500638.4.peg.2836	fig|636.4.peg.2411
ETAE_3151	dusB	Cytoplasmic	tRNA-dihydrouridine synthase B	fig|718251.4.peg.2926	fig|667120.3.peg.2284	fig|67780.5.peg.2288	fig|634503.5.peg.3287	fig|667121.3.peg.1880	fig|500638.4.peg.2835	fig|636.4.peg.2410
ETAE_3152	fis	Unknown	DNA-binding protein	fig|718251.4.peg.2927	fig|667120.3.peg.2283	fig|67780.5.peg.2289	fig|634503.5.peg.3288	fig|667121.3.peg.1879	fig|500638.4.peg.2834	fig|636.4.peg.2409
ETAE_3166	xdhD	Cytoplasmic	fused predicted xanthine/hypoxanthine oxidase, molybdopterin-binding subunit and Fe-S binding subunit	fig|718251.4.peg.2940	fig|667120.3.peg.1655	fig|67780.5.peg.1208	fig|634503.5.peg.3302	fig|667121.3.peg.1867	fig|500638.4.peg.2822	fig|636.4.peg.2397
ETAE_3167		Unknown	hypothetical protein	fig|718251.4.peg.2941	fig|667120.3.peg.1654	fig|67780.5.peg.1209	fig|634503.5.peg.3303	fig|667121.3.peg.1866	fig|500638.4.peg.2821	fig|636.4.peg.2396
ETAE_3168		Cytoplasmic	putative chlorohydrolase/aminohydrolase	fig|718251.4.peg.2942	fig|667120.3.peg.1653	fig|67780.5.peg.1210	fig|634503.5.peg.3304	fig|667121.3.peg.1865	fig|500638.4.peg.2820	fig|636.4.peg.2395
ETAE_3169		Cytoplasmic	hypothetical protein	fig|718251.4.peg.2943	fig|667120.3.peg.1652	fig|67780.5.peg.1211	fig|634503.5.peg.3305	fig|667121.3.peg.1864	fig|500638.4.peg.2819	fig|636.4.peg.2394
ETAE_3172		Unknown	hypothetical protein	fig|718251.4.peg.2945	fig|667120.3.peg.1649	fig|67780.5.peg.1213	fig|634503.5.peg.3308	fig|667121.3.peg.1862	fig|500638.4.peg.2817	fig|636.4.peg.2392
ETAE_3173	xdhC	Unknown	xanthine dehydrogenase accessory factor, putative subfamily	fig|718251.4.peg.2946	fig|667120.3.peg.1648	fig|67780.5.peg.1214	fig|634503.5.peg.3309	fig|667121.3.peg.1861	fig|500638.4.peg.2816	fig|636.4.peg.2391
ETAE_3174	arcC	Cytoplasmic	carbamate kinase	fig|718251.4.peg.2947	fig|667120.3.peg.1647	fig|67780.5.peg.1215	fig|634503.5.peg.3310	fig|667121.3.peg.1860	fig|500638.4.peg.2815	fig|636.4.peg.2390
ETAE_3175	ygeZ	Cytoplasmic	dihydropyrimidinase	fig|718251.4.peg.2948	fig|667120.3.peg.1646	fig|67780.5.peg.1216	fig|634503.5.peg.3311	fig|667121.3.peg.1859	fig|500638.4.peg.2814	fig|636.4.peg.2389
ETAE_3176	ygeY	Cytoplasmic	putative peptidase	fig|718251.4.peg.2949	fig|667120.3.peg.1645	fig|67780.5.peg.1217	fig|634503.5.peg.3312	fig|667121.3.peg.1858	fig|500638.4.peg.2813	fig|636.4.peg.2388
ETAE_3177	ygeX	Unknown	iaminopropionate ammonia-lyase	fig|718251.4.peg.2950	fig|667120.3.peg.1644	fig|67780.5.peg.1218	fig|634503.5.peg.3313	fig|667121.3.peg.1857	fig|500638.4.peg.2812	fig|636.4.peg.2387
ETAE_3178	ygeW	Cytoplasmic	aspartate/ornithine carbamoyltransferase family protein	fig|718251.4.peg.2951	fig|667120.3.peg.1643	fig|67780.5.peg.1219	fig|634503.5.peg.3314	fig|667121.3.peg.1856	fig|500638.4.peg.2811	fig|636.4.peg.2386
ETAE_3181	ygeV	Unknown	predicted DNA-binding transcriptional regulator	fig|718251.4.peg.2953	fig|667120.3.peg.1642	fig|67780.5.peg.1220	fig|634503.5.peg.3315	fig|667121.3.peg.1855	fig|500638.4.peg.2810	fig|636.4.peg.2385
ETAE_3184	uvrA	Cytoplasmic	excinuclease ABC, A subunit	fig|718251.4.peg.2956	fig|667120.3.peg.1639	fig|67780.5.peg.1223	fig|634503.5.peg.3318	fig|667121.3.peg.1852	fig|500638.4.peg.2806	fig|636.4.peg.2382
ETAE_3185		Unknown	hypothetical protein	fig|718251.4.peg.2957	fig|667120.3.peg.1638	fig|67780.5.peg.1224	fig|634503.5.peg.3319	fig|667121.3.peg.1851	fig|500638.4.peg.2805	fig|636.4.peg.2381
ETAE_3187	tyrB	Cytoplasmic	aromatic-amino-acid transaminase	fig|718251.4.peg.2959	fig|667120.3.peg.1636	fig|67780.5.peg.1226	fig|634503.5.peg.3321	fig|667121.3.peg.1849	fig|500638.4.peg.2803	fig|636.4.peg.2379
ETAE_3188	dkgA	Cytoplasmic	2,5-diketo-D-gluconate reductase A	fig|718251.4.peg.2960	fig|667120.3.peg.1635	fig|67780.5.peg.1227	fig|634503.5.peg.3322	fig|667121.3.peg.1848	fig|500638.4.peg.2802	fig|636.4.peg.2378
ETAE_3189		Unknown	putative Fe-S oxidoreductase	fig|718251.4.peg.2961	fig|667120.3.peg.1634	fig|67780.5.peg.1228	fig|634503.5.peg.3323	fig|667121.3.peg.1847	fig|500638.4.peg.2801	fig|636.4.peg.2377
ETAE_3190	metA	Cytoplasmic	homoserine O-succinyltransferase	fig|718251.4.peg.2962	fig|667120.3.peg.1633	fig|67780.5.peg.1229	fig|634503.5.peg.3324	fig|667121.3.peg.1846	fig|500638.4.peg.2800	fig|636.4.peg.2376
ETAE_3192		Cytoplasmic	putative carbonic anhydrase/acetyltransferase	fig|718251.4.peg.2965	fig|667120.3.peg.44	fig|67780.5.peg.469	fig|634503.5.peg.3325	fig|667121.3.peg.914	fig|500638.4.peg.3194	fig|636.4.peg.1919
ETAE_3193	yrdB	Cytoplasmic	putative periplasmic protein	fig|718251.4.peg.2966	fig|667120.3.peg.43	fig|67780.5.peg.470	fig|634503.5.peg.3326	fig|667121.3.peg.913	fig|500638.4.peg.3195	fig|636.4.peg.1918
ETAE_3194	aroE	Unknown	shikimate 5-dehydrogenase	fig|718251.4.peg.2967	fig|667120.3.peg.42	fig|67780.5.peg.471	fig|634503.5.peg.3327	fig|667121.3.peg.912	fig|500638.4.peg.3196	fig|636.4.peg.1917
ETAE_3195	yrdC	Unknown	putative ribosome maturation factor	fig|718251.4.peg.2968	fig|667120.3.peg.41	fig|67780.5.peg.472	fig|634503.5.peg.3328	fig|667121.3.peg.911	fig|500638.4.peg.3197	fig|636.4.peg.1916
ETAE_3196	yrdD	Cytoplasmic	putative DNA topoisomerase	fig|718251.4.peg.2969	fig|667120.3.peg.40	fig|67780.5.peg.473	fig|634503.5.peg.3329	fig|667121.3.peg.910	fig|500638.4.peg.3198	fig|636.4.peg.1915
ETAE_3197		Cytoplasmic	hypothetical protein	fig|718251.4.peg.2970	fig|667120.3.peg.39	fig|67780.5.peg.474	fig|634503.5.peg.3330	fig|667121.3.peg.909	fig|500638.4.peg.3199	fig|636.4.peg.1914
ETAE_3198		Unknown	hypothetical protein	fig|718251.4.peg.2971	fig|667120.3.peg.38	fig|67780.5.peg.475	fig|634503.5.peg.3331	fig|667121.3.peg.908	fig|500638.4.peg.3200	fig|636.4.peg.1913
ETAE_3199		Cytoplasmic	peptide deformylase	fig|718251.4.peg.2972	fig|667120.3.peg.37	fig|67780.5.peg.476	fig|634503.5.peg.3332	fig|667121.3.peg.907	fig|500638.4.peg.3201	fig|636.4.peg.1912
ETAE_3200		Unknown	methionyl-tRNA formyltransferase	fig|718251.4.peg.2973	fig|667120.3.peg.36	fig|67780.5.peg.477	fig|634503.5.peg.3333	fig|667121.3.peg.906	fig|500638.4.peg.3202	fig|636.4.peg.1911
ETAE_3201	rsmB	Unknown	16S rRNA methyltransferase B	fig|718251.4.peg.2974	fig|667120.3.peg.35	fig|67780.5.peg.478	fig|634503.5.peg.3334	fig|667121.3.peg.905	fig|500638.4.peg.3203	fig|636.4.peg.1910
ETAE_3202		Cytoplasmic	TrkA-N domain protein	fig|718251.4.peg.2975	fig|667120.3.peg.34	fig|67780.5.peg.479	fig|634503.5.peg.3335	fig|667121.3.peg.904	fig|500638.4.peg.3204	fig|636.4.peg.1909
ETAE_3203	trkH	CytoplasmicMembrane	Trk system potassium uptake protein	fig|718251.4.peg.2976	fig|667120.3.peg.33	fig|67780.5.peg.480	fig|634503.5.peg.3336	fig|667121.3.peg.903	fig|500638.4.peg.3205	fig|636.4.peg.1908
ETAE_3205	zntR	Cytoplasmic	zinc-responsive transcriptional regulator	fig|718251.4.peg.2978	fig|667120.3.peg.31	fig|67780.5.peg.483	fig|634503.5.peg.3339	fig|667121.3.peg.901	fig|500638.4.peg.3207	fig|636.4.peg.1906
ETAE_3207	rplQ	Unknown	50S ribosomal protein L17	fig|718251.4.peg.2980	fig|667120.3.peg.29	fig|67780.5.peg.485	fig|634503.5.peg.3341	fig|667121.3.peg.899	fig|500638.4.peg.3209	fig|636.4.peg.1904
ETAE_3208	rpoA	Cytoplasmic	DNA-directed RNA polymerase subunit alpha	fig|718251.4.peg.2981	fig|667120.3.peg.28	fig|67780.5.peg.486	fig|634503.5.peg.3342	fig|667121.3.peg.898	fig|500638.4.peg.3210	fig|636.4.peg.1903
ETAE_3209	rpsD	Cytoplasmic	30S ribosomal protein S4	fig|718251.4.peg.2982	fig|667120.3.peg.27	fig|67780.5.peg.487	fig|634503.5.peg.3343	fig|667121.3.peg.897	fig|500638.4.peg.3211	fig|636.4.peg.1902
ETAE_3210	rpsM	Unknown	30S ribosomal protein S13	fig|718251.4.peg.2984	fig|667120.3.peg.25	fig|67780.5.peg.489	fig|634503.5.peg.3345	fig|667121.3.peg.895	fig|500638.4.peg.3213	fig|636.4.peg.1900
ETAE_3211	secY	CytoplasmicMembrane	preprotein translocase subunit SecY	fig|718251.4.peg.2986	fig|667120.3.peg.23	fig|67780.5.peg.491	fig|634503.5.peg.3347	fig|667121.3.peg.893	fig|500638.4.peg.3215	fig|636.4.peg.1898
ETAE_3214	rplR	Cytoplasmic	50S ribosomal protein L18	fig|718251.4.peg.2990	fig|667120.3.peg.19	fig|67780.5.peg.495	fig|634503.5.peg.3351	fig|667121.3.peg.889	fig|500638.4.peg.3219	fig|636.4.peg.1894
ETAE_3215	rplF	Unknown	50S ribosomal protein L6	fig|718251.4.peg.2991	fig|667120.3.peg.18	fig|67780.5.peg.496	fig|634503.5.peg.3352	fig|667121.3.peg.888	fig|500638.4.peg.3220	fig|636.4.peg.1893
ETAE_3216	rpsH	Unknown	30S ribosomal protein S8	fig|718251.4.peg.2992	fig|667120.3.peg.17	fig|67780.5.peg.497	fig|634503.5.peg.3353	fig|667121.3.peg.887	fig|500638.4.peg.3221	fig|636.4.peg.1892
ETAE_3217	rpsN	Cytoplasmic	30S ribosomal protein S14	fig|718251.4.peg.2993	fig|667120.3.peg.16	fig|67780.5.peg.498	fig|634503.5.peg.3354	fig|667121.3.peg.886	fig|500638.4.peg.3222	fig|636.4.peg.1891
ETAE_3218	rplE	Unknown	50S ribosomal protein L5	fig|718251.4.peg.2994	fig|667120.3.peg.15	fig|67780.5.peg.499	fig|634503.5.peg.3355	fig|667121.3.peg.885	fig|500638.4.peg.3223	fig|636.4.peg.1890
ETAE_3219	rplX	Unknown	50S ribosomal protein L24	fig|718251.4.peg.2995	fig|667120.3.peg.14	fig|67780.5.peg.500	fig|634503.5.peg.3356	fig|667121.3.peg.884	fig|500638.4.peg.3224	fig|636.4.peg.1889
ETAE_3220	rplN	Unknown	50S ribosomal protein L14	fig|718251.4.peg.2996	fig|667120.3.peg.13	fig|67780.5.peg.501	fig|634503.5.peg.3357	fig|667121.3.peg.883	fig|500638.4.peg.3225	fig|636.4.peg.1888
ETAE_3221	rpsQ	Unknown	30S ribosomal protein S17	fig|718251.4.peg.2997	fig|667120.3.peg.12	fig|67780.5.peg.502	fig|634503.5.peg.3358	fig|667121.3.peg.882	fig|500638.4.peg.3226	fig|636.4.peg.1887
ETAE_3222	rpmC	Cytoplasmic	50S ribosomal protein L29	fig|718251.4.peg.2998	fig|667120.3.peg.11	fig|67780.5.peg.503	fig|634503.5.peg.3359	fig|667121.3.peg.881	fig|500638.4.peg.3227	fig|636.4.peg.1886
ETAE_3223	rplP	Unknown	50S ribosomal protein L16	fig|718251.4.peg.2999	fig|667120.3.peg.10	fig|67780.5.peg.504	fig|634503.5.peg.3360	fig|667121.3.peg.880	fig|500638.4.peg.3228	fig|636.4.peg.1885
ETAE_3224	rpsC	Cytoplasmic	30S ribosomal protein S3	fig|718251.4.peg.3000	fig|667120.3.peg.9	fig|67780.5.peg.505	fig|634503.5.peg.3361	fig|667121.3.peg.879	fig|500638.4.peg.3229	fig|636.4.peg.1884
ETAE_3225	rplV	Cytoplasmic	50S ribosomal protein L22	fig|718251.4.peg.3001	fig|667120.3.peg.8	fig|67780.5.peg.506	fig|634503.5.peg.3362	fig|667121.3.peg.878	fig|500638.4.peg.3230	fig|636.4.peg.1883
ETAE_3226	rplB	Unknown	50S ribosomal protein L2	fig|718251.4.peg.3003	fig|667120.3.peg.6	fig|67780.5.peg.508	fig|634503.5.peg.3364	fig|667121.3.peg.876	fig|500638.4.peg.3232	fig|636.4.peg.1881
ETAE_3227	rplW	Cytoplasmic	50S ribosomal protein L23	fig|718251.4.peg.3004	fig|667120.3.peg.5	fig|67780.5.peg.509	fig|634503.5.peg.3365	fig|667121.3.peg.875	fig|500638.4.peg.3233	fig|636.4.peg.1880
ETAE_3229	rplC	Unknown	50S ribosomal protein L3	fig|718251.4.peg.3006	fig|667120.3.peg.3	fig|67780.5.peg.511	fig|634503.5.peg.3367	fig|667121.3.peg.873	fig|500638.4.peg.3235	fig|636.4.peg.1878
ETAE_3230	rpsJ	Unknown	30S ribosomal protein S10	fig|718251.4.peg.3007	fig|667120.3.peg.2	fig|67780.5.peg.512	fig|634503.5.peg.3368	fig|667121.3.peg.872	fig|500638.4.peg.3236	fig|636.4.peg.1877
ETAE_3232	fusA	Cytoplasmic	elongation factor G	fig|718251.4.peg.3009	fig|667120.3.peg.2152	fig|67780.5.peg.622	fig|634503.5.peg.3370	fig|667121.3.peg.1010	fig|500638.4.peg.3239	fig|636.4.peg.1813
ETAE_3233	rpsG	Unknown	30S ribosomal protein S7	fig|718251.4.peg.3010	fig|667120.3.peg.2151	fig|67780.5.peg.621	fig|634503.5.peg.3371	fig|667121.3.peg.1011	fig|500638.4.peg.3240	fig|636.4.peg.1814
ETAE_3235		Unknown	hypothetical protein	fig|718251.4.peg.3012	fig|667120.3.peg.2149	fig|67780.5.peg.619	fig|634503.5.peg.3373	fig|667121.3.peg.1013	fig|500638.4.peg.3242	fig|636.4.peg.1816
ETAE_3237		Unknown	hypothetical protein	fig|718251.4.peg.3014	fig|667120.3.peg.2147	fig|67780.5.peg.617	fig|634503.5.peg.3375	fig|667121.3.peg.1015	fig|500638.4.peg.3244	fig|636.4.peg.1818
ETAE_3238		Cytoplasmic	YheO domain protein	fig|718251.4.peg.3015	fig|667120.3.peg.2146	fig|67780.5.peg.616	fig|634503.5.peg.3376	fig|667121.3.peg.1016	fig|500638.4.peg.3245	fig|636.4.peg.1819
ETAE_3240	fkpA	Periplasmic	FKBP-type peptidyl-prolyl cis-trans isomerase (rotamase)	fig|718251.4.peg.3017	fig|667120.3.peg.2145	fig|67780.5.peg.615	fig|634503.5.peg.3377	fig|667121.3.peg.1017	fig|500638.4.peg.3246	fig|636.4.peg.1820
ETAE_3241		Cytoplasmic	hypothetical protein	fig|718251.4.peg.3018	fig|667120.3.peg.2144	fig|67780.5.peg.614	fig|634503.5.peg.3378	fig|667121.3.peg.1018	fig|500638.4.peg.3247	fig|636.4.peg.1821
ETAE_3242	slyD	Cytoplasmic	FKBP-type peptidyl-prolyl cis-trans isomerase SlyD	fig|718251.4.peg.3019	fig|667120.3.peg.2143	fig|67780.5.peg.613	fig|634503.5.peg.3379	fig|667121.3.peg.749	fig|500638.4.peg.3248	fig|636.4.peg.1658
ETAE_3243		Unknown	hypothetical protein	fig|718251.4.peg.3020	fig|667120.3.peg.2142	fig|67780.5.peg.612	fig|634503.5.peg.3380	fig|667121.3.peg.750	fig|500638.4.peg.3249	fig|636.4.peg.1657
ETAE_3244	kefB	CytoplasmicMembrane	glutathione-regulated potassium-efflux system protein	fig|718251.4.peg.3021	fig|667120.3.peg.2141	fig|67780.5.peg.611	fig|634503.5.peg.3381	fig|667121.3.peg.751	fig|500638.4.peg.3250	fig|636.4.peg.1656
ETAE_3245	kefG	Cytoplasmic	glutathione-regulated potassium-efflux system ancillary protein	fig|718251.4.peg.3022	fig|667120.3.peg.2140	fig|67780.5.peg.610	fig|634503.5.peg.3382	fig|667121.3.peg.752	fig|500638.4.peg.3251	fig|636.4.peg.1655
ETAE_3246	ABCF3	CytoplasmicMembrane	ATP-binding cassette, sub-family F, member 3	fig|718251.4.peg.3023	fig|667120.3.peg.2138	fig|67780.5.peg.609	fig|634503.5.peg.3383	fig|667121.3.peg.753	fig|500638.4.peg.3252	fig|636.4.peg.1654
ETAE_3247	argD	Unknown	acetylornithine/N-succinyldiaminopimelate aminotransferase	fig|718251.4.peg.3024	fig|667120.3.peg.2137	fig|67780.5.peg.608	fig|634503.5.peg.3384	fig|667121.3.peg.754	fig|500638.4.peg.3253	fig|636.4.peg.1653
ETAE_3248	trpD	Cytoplasmic	anthranilate synthase component II	fig|718251.4.peg.3025	fig|667120.3.peg.2135	fig|67780.5.peg.607	fig|634503.5.peg.3385	fig|667121.3.peg.755	fig|500638.4.peg.3254	fig|636.4.peg.1652
ETAE_3250	ppiA	Periplasmic	peptidyl-prolyl cis-trans isomerase A	fig|718251.4.peg.3026	fig|667120.3.peg.2134	fig|67780.5.peg.606	fig|634503.5.peg.3386	fig|667121.3.peg.756	fig|500638.4.peg.3255	fig|636.4.peg.1651
ETAE_3251		CytoplasmicMembrane	major facilitator superfamily MFS_1	fig|718251.4.peg.3027	fig|667120.3.peg.2133	fig|67780.5.peg.605	fig|634503.5.peg.3387	fig|667121.3.peg.757	fig|500638.4.peg.3256	fig|636.4.peg.1650
ETAE_3252	codA	Cytoplasmic	cytosine deaminase	fig|718251.4.peg.3028	fig|667120.3.peg.2132	fig|67780.5.peg.604	fig|634503.5.peg.3388	fig|667121.3.peg.758	fig|500638.4.peg.3257	fig|636.4.peg.1649
ETAE_3253	codB	CytoplasmicMembrane	cytosine permease	fig|718251.4.peg.3029	fig|667120.3.peg.2131	fig|67780.5.peg.603	fig|634503.5.peg.3389	fig|667121.3.peg.759	fig|500638.4.peg.3258	fig|636.4.peg.1648
ETAE_3255	trpS	Cytoplasmic	tryptophanyl-tRNA synthetase	fig|718251.4.peg.3031	fig|667120.3.peg.2129	fig|67780.5.peg.601	fig|634503.5.peg.3391	fig|667121.3.peg.204	fig|500638.4.peg.3260	fig|636.4.peg.1646
ETAE_3256	gph	Unknown	phosphoglycolate phosphatase	fig|718251.4.peg.3032	fig|667120.3.peg.2128	fig|67780.5.peg.600	fig|634503.5.peg.3392	fig|667121.3.peg.203	fig|500638.4.peg.3261	fig|636.4.peg.1645
ETAE_3257	rpe	Cytoplasmic	ribulose-phosphate 3-epimerase	fig|718251.4.peg.3033	fig|667120.3.peg.2127	fig|67780.5.peg.599	fig|634503.5.peg.3393	fig|667121.3.peg.202	fig|500638.4.peg.3262	fig|636.4.peg.1644
ETAE_3259		Unknown	hypothetical protein	fig|718251.4.peg.3035	fig|667120.3.peg.2125	fig|67780.5.peg.597	fig|634503.5.peg.3395	fig|667121.3.peg.200	fig|500638.4.peg.3264	fig|636.4.peg.1642
ETAE_3260	aro1	Cytoplasmic	3-dehydroquinate synthetase	fig|718251.4.peg.3036	fig|667120.3.peg.2124	fig|67780.5.peg.596	fig|634503.5.peg.3396	fig|667121.3.peg.199	fig|500638.4.peg.3265	fig|636.4.peg.1641
ETAE_3261	aroK	Cytoplasmic	shikimate kinase I	fig|718251.4.peg.3037	fig|667120.3.peg.2123	fig|67780.5.peg.595	fig|634503.5.peg.3397	fig|667121.3.peg.198	fig|500638.4.peg.3266	fig|636.4.peg.1640
ETAE_3262	hofQ	OuterMembrane	Type II secretory pathway, component	fig|718251.4.peg.3038	fig|667120.3.peg.2122	fig|67780.5.peg.594	fig|634503.5.peg.3399	fig|667121.3.peg.197	fig|500638.4.peg.3267	fig|636.4.peg.1639
ETAE_3267	mrcA	Unknown	penicillin-binding protein	fig|718251.4.peg.3043	fig|667120.3.peg.2117	fig|67780.5.peg.589	fig|634503.5.peg.3404	fig|667121.3.peg.193	fig|500638.4.peg.3271	fig|636.4.peg.1635
ETAE_3268	nudE	Cytoplasmic	ADP-ribose diphosphatase	fig|718251.4.peg.3044	fig|667120.3.peg.2116	fig|67780.5.peg.586	fig|634503.5.peg.3407	fig|667121.3.peg.192	fig|500638.4.peg.3272	fig|636.4.peg.1634
ETAE_3269		CytoplasmicMembrane	hypothetical protein	fig|718251.4.peg.3045	fig|667120.3.peg.2115	fig|67780.5.peg.584	fig|634503.5.peg.3409	fig|667121.3.peg.191	fig|500638.4.peg.3273	fig|636.4.peg.1633
ETAE_3270		Cytoplasmic	hypothetical protein	fig|718251.4.peg.3046	fig|667120.3.peg.2114	fig|67780.5.peg.583	fig|634503.5.peg.3410	fig|667121.3.peg.190	fig|500638.4.peg.3274	fig|636.4.peg.1632
ETAE_3271	hslR	Unknown	ribosome-associated heat shock protein Hsp15	fig|718251.4.peg.3047	fig|667120.3.peg.2113	fig|67780.5.peg.582	fig|634503.5.peg.3411	fig|667121.3.peg.189	fig|500638.4.peg.3275	fig|636.4.peg.1631
ETAE_3272		Cytoplasmic	disulfide bond chaperones of the HSP33 family	fig|718251.4.peg.3048	fig|667120.3.peg.2112	fig|67780.5.peg.581	fig|634503.5.peg.3412	fig|667121.3.peg.188	fig|500638.4.peg.3276	fig|636.4.peg.1630
ETAE_3273		Unknown	hypothetical protein	fig|718251.4.peg.3049	fig|667120.3.peg.2111	fig|67780.5.peg.580	fig|634503.5.peg.3413	fig|667121.3.peg.187	fig|500638.4.peg.3277	fig|636.4.peg.1629
ETAE_3275		Periplasmic	hypothetical protein	fig|718251.4.peg.3051	fig|667120.3.peg.2109	fig|67780.5.peg.578	fig|634503.5.peg.3415	fig|667121.3.peg.185	fig|500638.4.peg.3279	fig|636.4.peg.1627
ETAE_3276		Unknown	rhodanese domain protein	fig|718251.4.peg.3052	fig|667120.3.peg.2108	fig|67780.5.peg.577	fig|634503.5.peg.3416	fig|667121.3.peg.184	fig|500638.4.peg.3280	fig|636.4.peg.1626
ETAE_3277	pckA	Cytoplasmic	phosphoenolpyruvate carboxykinase	fig|718251.4.peg.3053	fig|667120.3.peg.2107	fig|67780.5.peg.575	fig|634503.5.peg.3417	fig|667121.3.peg.183	fig|500638.4.peg.3281	fig|636.4.peg.1625
ETAE_3278	envZ	CytoplasmicMembrane	osmolarity sensor protein	fig|718251.4.peg.3054	fig|667120.3.peg.2106	fig|67780.5.peg.574	fig|634503.5.peg.3418	fig|667121.3.peg.780	fig|500638.4.peg.3282	fig|636.4.peg.1624
ETAE_3279	ompR	Cytoplasmic	osmolarity response regulator	fig|718251.4.peg.3055	fig|667120.3.peg.2105	fig|67780.5.peg.573	fig|634503.5.peg.3419	fig|667121.3.peg.781	fig|500638.4.peg.3283	fig|636.4.peg.1623
ETAE_3280	greB	Unknown	transcription elongation factor	fig|718251.4.peg.3056	fig|667120.3.peg.2104	fig|67780.5.peg.572	fig|634503.5.peg.3420	fig|667121.3.peg.783	fig|500638.4.peg.3285	fig|636.4.peg.1621
ETAE_3281		Cytoplasmic	RNA binding S1 domain protein	fig|718251.4.peg.3057	fig|667120.3.peg.2103	fig|67780.5.peg.571	fig|634503.5.peg.3421	fig|667121.3.peg.784	fig|500638.4.peg.3286	fig|636.4.peg.1620
ETAE_3284	feoB	CytoplasmicMembrane	ferrous iron transport protein B	fig|718251.4.peg.3059	fig|667120.3.peg.2100	fig|67780.5.peg.569	fig|634503.5.peg.3423	fig|667121.3.peg.787	fig|500638.4.peg.3288	fig|636.4.peg.1617
ETAE_3285	feoC	Cytoplasmic	ferrous iron transport protein C	fig|718251.4.peg.3060	fig|667120.3.peg.2099	fig|67780.5.peg.568	fig|634503.5.peg.3424	fig|667121.3.peg.788	fig|500638.4.peg.3289	fig|636.4.peg.1616
ETAE_3288	nfuA	Cytoplasmic	Fe/S biogenesis protein NfuA	fig|718251.4.peg.3063	fig|667120.3.peg.2095	fig|67780.5.peg.565	fig|634503.5.peg.3427	fig|667121.3.peg.791	fig|500638.4.peg.3293	fig|636.4.peg.1613
ETAE_3298		CytoplasmicMembrane	integral membrane protein	fig|718251.4.peg.3072	fig|667120.3.peg.2086	fig|67780.5.peg.556	fig|634503.5.peg.3437	fig|667121.3.peg.792	fig|500638.4.peg.3294	fig|636.4.peg.1612
ETAE_3299		Cytoplasmic	cAMP-regulatory protein	fig|718251.4.peg.3073	fig|667120.3.peg.2085	fig|67780.5.peg.555	fig|634503.5.peg.3438	fig|667121.3.peg.793	fig|500638.4.peg.3295	fig|636.4.peg.1611
ETAE_3300		Cytoplasmic	hypothetical protein	fig|718251.4.peg.3074	fig|667120.3.peg.2084	fig|67780.5.peg.554	fig|634503.5.peg.3439	fig|667121.3.peg.794	fig|500638.4.peg.3296	fig|636.4.peg.1610
ETAE_3301		Unknown	hypothetical protein	fig|718251.4.peg.3075	fig|667120.3.peg.2083	fig|67780.5.peg.553	fig|634503.5.peg.3440	fig|667121.3.peg.795	fig|500638.4.peg.3297	fig|636.4.peg.1609
ETAE_3302		CytoplasmicMembrane	lysine exporter protein	fig|718251.4.peg.3076	fig|667120.3.peg.2082	fig|67780.5.peg.552	fig|634503.5.peg.3441	fig|667121.3.peg.796	fig|500638.4.peg.3298	fig|636.4.peg.1608
ETAE_3303	malT	Cytoplasmic	ATP-dependent transcriptional regulator MalT-like, LuxR family	fig|718251.4.peg.3077	fig|667120.3.peg.2081	fig|67780.5.peg.551	fig|634503.5.peg.3442	fig|667121.3.peg.797	fig|500638.4.peg.3299	fig|636.4.peg.1607
ETAE_3304	glgP	Unknown	glycogen/starch/alpha-glucan phosphorylase	fig|718251.4.peg.3078	fig|667120.3.peg.2080	fig|67780.5.peg.550	fig|634503.5.peg.3443	fig|667121.3.peg.798	fig|500638.4.peg.3300	fig|636.4.peg.1606
ETAE_3305	malQ	Cytoplasmic	4-alpha-glucanotransferase	fig|718251.4.peg.3079	fig|667120.3.peg.2079	fig|67780.5.peg.549	fig|634503.5.peg.3444	fig|667121.3.peg.799	fig|500638.4.peg.3301	fig|636.4.peg.1605
ETAE_3306	glgC	Cytoplasmic	glucose-1-phosphate adenylyltransferase	fig|718251.4.peg.3080	fig|667120.3.peg.2078	fig|67780.5.peg.548	fig|634503.5.peg.3445	fig|667121.3.peg.800	fig|500638.4.peg.3302	fig|636.4.peg.1604
ETAE_3307	glgB	Cytoplasmic	glycogen branching enzyme	fig|718251.4.peg.3081	fig|667120.3.peg.2077	fig|67780.5.peg.546	fig|634503.5.peg.3447	fig|667121.3.peg.801	fig|500638.4.peg.3303	fig|636.4.peg.1603
ETAE_3308	glgX	Cytoplasmic	glycogen debranching enzyme	fig|718251.4.peg.3082	fig|667120.3.peg.2076	fig|67780.5.peg.545	fig|634503.5.peg.3448	fig|667121.3.peg.802	fig|500638.4.peg.3304	fig|636.4.peg.1602
ETAE_3309	glgC	Unknown	glucose-1-phosphate adenylyltransferase	fig|718251.4.peg.3083	fig|667120.3.peg.2075	fig|67780.5.peg.544	fig|634503.5.peg.3449	fig|667121.3.peg.803	fig|500638.4.peg.3305	fig|636.4.peg.1601
ETAE_3310	glgA	Unknown	glycogen synthase	fig|718251.4.peg.3084	fig|667120.3.peg.2074	fig|67780.5.peg.543	fig|634503.5.peg.3450	fig|667121.3.peg.804	fig|500638.4.peg.3306	fig|636.4.peg.1600
ETAE_3311	glgP	Unknown	glucan phosphorylase	fig|718251.4.peg.3085	fig|667120.3.peg.2073	fig|67780.5.peg.542	fig|634503.5.peg.3451	fig|667121.3.peg.805	fig|500638.4.peg.3307	fig|636.4.peg.1599
ETAE_3312	glpD	Cytoplasmic	glycerol-3-phosphate dehydrogenase	fig|718251.4.peg.3086	fig|667120.3.peg.2072	fig|67780.5.peg.541	fig|634503.5.peg.3452	fig|667121.3.peg.806	fig|500638.4.peg.3308	fig|636.4.peg.1598
ETAE_3313	glpR	Cytoplasmic	DNA-binding transcriptional repressor	fig|718251.4.peg.3087	fig|667120.3.peg.2071	fig|67780.5.peg.540	fig|634503.5.peg.3453	fig|667121.3.peg.808	fig|500638.4.peg.3310	fig|636.4.peg.1596
ETAE_3314	glpG	CytoplasmicMembrane	predicted intramembrane serine protease	fig|718251.4.peg.3088	fig|667120.3.peg.2070	fig|67780.5.peg.539	fig|634503.5.peg.3454	fig|667121.3.peg.809	fig|500638.4.peg.3311	fig|636.4.peg.1595
ETAE_3316	glpE	Unknown	thiosulfate sulfurtransferase	fig|718251.4.peg.3089	fig|667120.3.peg.2069	fig|67780.5.peg.538	fig|634503.5.peg.3455	fig|667121.3.peg.810	fig|500638.4.peg.3312	fig|636.4.peg.1594
ETAE_3317	glpQ	Cytoplasmic	glycerophosphoryl diester phosphodiesterase	fig|718251.4.peg.3091	fig|667120.3.peg.2066	fig|67780.5.peg.536	fig|634503.5.peg.3457	fig|667121.3.peg.812	fig|500638.4.peg.3314	fig|636.4.peg.1592
ETAE_3322		Unknown	hypothetical protein	fig|718251.4.peg.3096	fig|667120.3.peg.2061	fig|67780.5.peg.524	fig|634503.5.peg.3469	fig|667121.3.peg.776	fig|500638.4.peg.3320	fig|636.4.peg.1587
ETAE_3323	glxK	Unknown	glycerate kinase	fig|718251.4.peg.3097	fig|667120.3.peg.2060	fig|67780.5.peg.523	fig|634503.5.peg.3470	fig|667121.3.peg.775	fig|500638.4.peg.3321	fig|636.4.peg.1586
ETAE_3325		Cytoplasmic	putative regulatory protein	fig|718251.4.peg.3099	fig|667120.3.peg.2058	fig|67780.5.peg.520	fig|634503.5.peg.3473	fig|667121.3.peg.773	fig|500638.4.peg.3323	fig|636.4.peg.1584
ETAE_3326	rpoH	Cytoplasmic	RNA polymerase factor sigma-32	fig|718251.4.peg.3100	fig|667120.3.peg.2057	fig|67780.5.peg.519	fig|634503.5.peg.3474	fig|667121.3.peg.772	fig|500638.4.peg.3324	fig|636.4.peg.1583
ETAE_3327		CytoplasmicMembrane	cell division protein	fig|718251.4.peg.3101	fig|667120.3.peg.2056	fig|67780.5.peg.518	fig|634503.5.peg.3475	fig|667121.3.peg.771	fig|500638.4.peg.3325	fig|636.4.peg.1582
ETAE_3328	ftsE	CytoplasmicMembrane	cell division protein	fig|718251.4.peg.3102	fig|667120.3.peg.2055	fig|67780.5.peg.517	fig|634503.5.peg.3476	fig|667121.3.peg.770	fig|500638.4.peg.3326	fig|636.4.peg.1581
ETAE_3330	rsmD	Unknown	ribosomal RNA small subunit methyltransferase D	fig|718251.4.peg.3104	fig|667120.3.peg.2053	fig|67780.5.peg.1858	fig|634503.5.peg.3478	fig|667121.3.peg.1191	fig|500638.4.peg.3328	fig|636.4.peg.876
ETAE_3331		CytoplasmicMembrane	hypothetical protein	fig|718251.4.peg.3105	fig|667120.3.peg.2052	fig|67780.5.peg.1857	fig|634503.5.peg.3479	fig|667121.3.peg.1192	fig|500638.4.peg.3329	fig|636.4.peg.875
ETAE_3333		Cytoplasmic	hypothetical protein	fig|718251.4.peg.3107	fig|667120.3.peg.2050	fig|67780.5.peg.1855	fig|634503.5.peg.3481	fig|667121.3.peg.1194	fig|500638.4.peg.3331	fig|636.4.peg.873
ETAE_3334		CytoplasmicMembrane	hypothetical protein	fig|718251.4.peg.3108	fig|667120.3.peg.2049	fig|67780.5.peg.1854	fig|634503.5.peg.3482	fig|667121.3.peg.1195	fig|500638.4.peg.3332	fig|636.4.peg.872
ETAE_3335		Cytoplasmic	MOSC domain containing protein	fig|718251.4.peg.3109	fig|667120.3.peg.2048	fig|67780.5.peg.1853	fig|634503.5.peg.3483	fig|667121.3.peg.1196	fig|500638.4.peg.3333	fig|636.4.peg.871
ETAE_3336	fdhD	Cytoplasmic	formate dehydrogenase accessory protein	fig|718251.4.peg.3110	fig|667120.3.peg.2047	fig|67780.5.peg.1852	fig|634503.5.peg.3484	fig|667121.3.peg.1197	fig|500638.4.peg.3334	fig|636.4.peg.870
ETAE_3338		Periplasmic	anaerobic dehydrogenases, typically selenocysteine-containing	fig|718251.4.peg.3111	fig|667120.3.peg.2046	fig|67780.5.peg.1851	fig|634503.5.peg.3485	fig|667121.3.peg.1198	fig|500638.4.peg.3335	fig|636.4.peg.869
ETAE_3339	fdnH	CytoplasmicMembrane	formate dehydrogenase-N beta subunit	fig|718251.4.peg.3112	fig|667120.3.peg.2045	fig|67780.5.peg.1850	fig|634503.5.peg.3486	fig|667121.3.peg.1199	fig|500638.4.peg.3336	fig|636.4.peg.868
ETAE_3340	fdnI	CytoplasmicMembrane	formate dehydrogenase-N subunit gamma	fig|718251.4.peg.3113	fig|667120.3.peg.2044	fig|67780.5.peg.1849	fig|634503.5.peg.3487	fig|667121.3.peg.1200	fig|500638.4.peg.3337	fig|636.4.peg.867
ETAE_3341	fdhE	Cytoplasmic	formate dehydrogenase accessory protein	fig|718251.4.peg.3114	fig|667120.3.peg.2043	fig|67780.5.peg.1848	fig|634503.5.peg.3488	fig|667121.3.peg.1201	fig|500638.4.peg.3338	fig|636.4.peg.866
ETAE_3342	cof	Cytoplasmic	Cof-like hydrolase	fig|718251.4.peg.3115	fig|667120.3.peg.2042	fig|67780.5.peg.1847	fig|634503.5.peg.3489	fig|667121.3.peg.1202	fig|500638.4.peg.3339	fig|636.4.peg.865
ETAE_3344	asd	Unknown	aspartate-semialdehyde dehydrogenase	fig|718251.4.peg.3117	fig|667120.3.peg.2039	fig|67780.5.peg.1845	fig|634503.5.peg.3491	fig|667121.3.peg.1204	fig|500638.4.peg.3342	fig|636.4.peg.863
ETAE_3346	mgtB	CytoplasmicMembrane	magnesium-translocating P-type ATPase	fig|718251.4.peg.3119	fig|667120.3.peg.2037	fig|67780.5.peg.1843	fig|634503.5.peg.3493	fig|667121.3.peg.1207	fig|500638.4.peg.3344	fig|636.4.peg.860
ETAE_3347		CytoplasmicMembrane	phosphate transporter	fig|718251.4.peg.3120	fig|667120.3.peg.2035	fig|67780.5.peg.1842	fig|634503.5.peg.3494	fig|667121.3.peg.1208	fig|500638.4.peg.3345	fig|636.4.peg.859
ETAE_3349	uspB	Unknown	universal stress protein	fig|718251.4.peg.3122	fig|667120.3.peg.2033	fig|67780.5.peg.1836	fig|634503.5.peg.3500	fig|667121.3.peg.1210	fig|500638.4.peg.3347	fig|636.4.peg.857
ETAE_3351	uspA	Cytoplasmic	universal stress protein A	fig|718251.4.peg.3123	fig|667120.3.peg.2031	fig|67780.5.peg.1835	fig|634503.5.peg.3501	fig|667121.3.peg.1211	fig|500638.4.peg.3349	fig|636.4.peg.855
ETAE_3353	gdhA	Cytoplasmic	glutamate dehydrogenase/leucine dehydrogenase	fig|718251.4.peg.3125	fig|667120.3.peg.2029	fig|67780.5.peg.1832	fig|634503.5.peg.3504	fig|667121.3.peg.570	fig|500638.4.peg.3351	fig|636.4.peg.853
ETAE_3354	kinB1, kinB	CytoplasmicMembrane	two-component system, NtrC family, sensor histidine kinase KinB	fig|718251.4.peg.3126	fig|667120.3.peg.2028	fig|67780.5.peg.1831	fig|634503.5.peg.3505	fig|667121.3.peg.571	fig|500638.4.peg.3352	fig|636.4.peg.852
ETAE_3355	vicR	Cytoplasmic	two-component system, OmpR family, response regulator VicR	fig|718251.4.peg.3127	fig|667120.3.peg.2027	fig|67780.5.peg.1830	fig|634503.5.peg.3506	fig|667121.3.peg.572	fig|500638.4.peg.3353	fig|636.4.peg.851
ETAE_3363		Unknown	conserved hypothetical protein	fig|718251.4.peg.3134	fig|667120.3.peg.2020	fig|67780.5.peg.1826	fig|634503.5.peg.3509	fig|667121.3.peg.579	fig|500638.4.peg.3359	fig|636.4.peg.844
ETAE_3364		Cytoplasmic	oligopeptidase A	fig|718251.4.peg.3135	fig|667120.3.peg.2019	fig|67780.5.peg.1825	fig|634503.5.peg.3510	fig|667121.3.peg.580	fig|500638.4.peg.3360	fig|636.4.peg.843
ETAE_3365		Unknown	hypothetical protein	fig|718251.4.peg.3136	fig|667120.3.peg.2018	fig|67780.5.peg.1824	fig|634503.5.peg.3511	fig|667121.3.peg.581	fig|500638.4.peg.3361	fig|636.4.peg.842
ETAE_3366		Cytoplasmic	hypothetical protein	fig|718251.4.peg.3137	fig|667120.3.peg.2017	fig|67780.5.peg.1823	fig|634503.5.peg.3512	fig|667121.3.peg.582	fig|500638.4.peg.3362	fig|636.4.peg.841
ETAE_3367	gor	Cytoplasmic	glutathione-disulfide reductase	fig|718251.4.peg.3138	fig|667120.3.peg.2016	fig|67780.5.peg.1822	fig|634503.5.peg.3513	fig|667121.3.peg.583	fig|500638.4.peg.3363	fig|636.4.peg.840
ETAE_3368	mcp	CytoplasmicMembrane	methyl-accepting chemotaxis sensory transducer	fig|718251.4.peg.3139	fig|667120.3.peg.2015	fig|67780.5.peg.1821	fig|634503.5.peg.3514	fig|667121.3.peg.584	fig|500638.4.peg.3364	fig|636.4.peg.839
ETAE_3371	ddlA	Cytoplasmic	D-alanylalanine synthetase	fig|718251.4.peg.3141	fig|667120.3.peg.2012	fig|67780.5.peg.1819	fig|634503.5.peg.3516	fig|667121.3.peg.586	fig|500638.4.peg.3366	fig|636.4.peg.837
ETAE_3373		Cytoplasmic	transcriptional regulator	fig|718251.4.peg.3143	fig|667120.3.peg.2010	fig|67780.5.peg.1818	fig|634503.5.peg.3517	fig|667121.3.peg.589	fig|500638.4.peg.3368	fig|636.4.peg.835
ETAE_3374		Unknown	CDP-diacylglycerol pyrophosphatase	fig|718251.4.peg.3144	fig|667120.3.peg.2009	fig|67780.5.peg.1817	fig|634503.5.peg.3518	fig|667121.3.peg.590	fig|500638.4.peg.3369	fig|636.4.peg.834
ETAE_3375		Cytoplasmic	hypothetical protein	fig|718251.4.peg.3145	fig|667120.3.peg.2008	fig|67780.5.peg.1816	fig|634503.5.peg.3519	fig|667121.3.peg.591	fig|500638.4.peg.3370	fig|636.4.peg.833
ETAE_3377		Cytoplasmic	sugar kinase, ribokinase family	fig|718251.4.peg.3146	fig|667120.3.peg.2006	fig|67780.5.peg.1815	fig|634503.5.peg.3520	fig|667121.3.peg.592	fig|500638.4.peg.3371	fig|636.4.peg.832
ETAE_3378		Unknown	predicted Zn-dependent peptidases	fig|718251.4.peg.3147	fig|667120.3.peg.2005	fig|67780.5.peg.1814	fig|634503.5.peg.3521	fig|667121.3.peg.593	fig|500638.4.peg.3372	fig|636.4.peg.831
ETAE_3379	dctA	CytoplasmicMembrane	C4-dicarboxylic acid, orotate and citrate transporter	fig|718251.4.peg.3148	fig|667120.3.peg.2004	fig|67780.5.peg.1813	fig|634503.5.peg.3522	fig|667121.3.peg.594	fig|500638.4.peg.3373	fig|636.4.peg.830
ETAE_3380		Unknown	diguanylate cyclase/phosphodiesterase	fig|718251.4.peg.3149	fig|667120.3.peg.2003	fig|67780.5.peg.1812	fig|634503.5.peg.3523	fig|667121.3.peg.595	fig|500638.4.peg.3374	fig|636.4.peg.829
ETAE_3382		Extracellular	endo-1,4-D-glucanase	fig|718251.4.peg.3151	fig|667120.3.peg.2001	fig|67780.5.peg.1806	fig|634503.5.peg.3529	fig|667121.3.peg.597	fig|500638.4.peg.3376	fig|636.4.peg.827
ETAE_3390	dppF	Cytoplasmic	dipeptide transporter ATP-binding subunit	fig|718251.4.peg.3158	fig|667120.3.peg.1993	fig|67780.5.peg.1803	fig|634503.5.peg.3532	fig|667121.3.peg.604	fig|500638.4.peg.3382	fig|636.4.peg.820
ETAE_3391	dppD	Unknown	dipeptide transporter ATP-binding subunit	fig|718251.4.peg.3159	fig|667120.3.peg.1992	fig|67780.5.peg.1802	fig|634503.5.peg.3533	fig|667121.3.peg.605	fig|500638.4.peg.3383	fig|636.4.peg.819
ETAE_3392	dppC	CytoplasmicMembrane	dipeptide transporter	fig|718251.4.peg.3160	fig|667120.3.peg.1991	fig|67780.5.peg.1801	fig|634503.5.peg.3534	fig|667121.3.peg.606	fig|500638.4.peg.3384	fig|636.4.peg.818
ETAE_3393	dppB	CytoplasmicMembrane	dipeptide transporter permease	fig|718251.4.peg.3161	fig|667120.3.peg.1990	fig|67780.5.peg.1800	fig|634503.5.peg.3535	fig|667121.3.peg.607	fig|500638.4.peg.3385	fig|636.4.peg.817
ETAE_3394	dppA	Periplasmic	periplasmic dipeptide transport protein	fig|718251.4.peg.3162	fig|667120.3.peg.1989	fig|67780.5.peg.1799	fig|634503.5.peg.3536	fig|667121.3.peg.608	fig|500638.4.peg.3386	fig|636.4.peg.816
ETAE_3395		Unknown	hypothetical protein	fig|718251.4.peg.3163	fig|667120.3.peg.1988	fig|67780.5.peg.1798	fig|634503.5.peg.3537	fig|667121.3.peg.610	fig|500638.4.peg.3388	fig|636.4.peg.814
ETAE_3396	uhpC	CytoplasmicMembrane	MFS transporter, OPA family, sugar phosphate sensor protein UhpC	fig|718251.4.peg.3164	fig|667120.3.peg.1987	fig|67780.5.peg.1797	fig|634503.5.peg.3538	fig|667121.3.peg.1671	fig|500638.4.peg.3389	fig|636.4.peg.813
ETAE_3398	uhpA	Cytoplasmic	two component LuxR family transcriptional regulator	fig|718251.4.peg.3166	fig|667120.3.peg.1985	fig|67780.5.peg.1795	fig|634503.5.peg.3540	fig|667121.3.peg.1673	fig|500638.4.peg.3067	fig|636.4.peg.811
ETAE_3399	mcp	CytoplasmicMembrane	methyl-accepting chemotaxis sensory transducer	fig|718251.4.peg.3167	fig|667120.3.peg.1984	fig|67780.5.peg.1794	fig|634503.5.peg.3541	fig|667121.3.peg.1674	fig|500638.4.peg.3068	fig|636.4.peg.810
ETAE_3400	proC	Cytoplasmic	pyrroline-5-carboxylate reductase	fig|718251.4.peg.3168	fig|667120.3.peg.1983	fig|67780.5.peg.1793	fig|634503.5.peg.3542	fig|667121.3.peg.1675	fig|500638.4.peg.3069	fig|636.4.peg.809
ETAE_3401	idi	Unknown	putative isopentenyldiphosphate isomerase	fig|718251.4.peg.3169	fig|667120.3.peg.1982	fig|67780.5.peg.1791	fig|634503.5.peg.3544	fig|667121.3.peg.1676	fig|500638.4.peg.3070	fig|636.4.peg.808
ETAE_3402		Cytoplasmic	AraC-type DNA-binding domain-containing protein	fig|718251.4.peg.3170	fig|667120.3.peg.1981	fig|67780.5.peg.1790	fig|634503.5.peg.3545	fig|667121.3.peg.1677	fig|500638.4.peg.3071	fig|636.4.peg.807
ETAE_3403		Unknown	putative filament protein	fig|718251.4.peg.3171	fig|667120.3.peg.1980	fig|67780.5.peg.1788	fig|634503.5.peg.3547	fig|667121.3.peg.1678	fig|500638.4.peg.3072	fig|636.4.peg.806
ETAE_3405		Unknown	hypothetical protein	fig|718251.4.peg.3172	fig|667120.3.peg.1978	fig|67780.5.peg.1787	fig|634503.5.peg.3549	fig|667121.3.peg.1679	fig|500638.4.peg.3073	fig|636.4.peg.805
ETAE_3429	thrA	Cytoplasmic	homoserine dehydrogenase	fig|718251.4.peg.3177	fig|667120.3.peg.1966	fig|67780.5.peg.1760	fig|634503.5.peg.3576	fig|667121.3.peg.1592	fig|500638.4.peg.3081	fig|636.4.peg.792
ETAE_3430	metB	Cytoplasmic	cystathionine beta-lyases/cystathionine gamma-synthases	fig|718251.4.peg.3178	fig|667120.3.peg.1965	fig|67780.5.peg.1761	fig|634503.5.peg.3575	fig|667121.3.peg.1591	fig|500638.4.peg.3082	fig|636.4.peg.791
ETAE_3431	metJ	Cytoplasmic	transcriptional regulator of met regulon	fig|718251.4.peg.3179	fig|667120.3.peg.1964	fig|67780.5.peg.1762	fig|634503.5.peg.3574	fig|667121.3.peg.1590	fig|500638.4.peg.3083	fig|636.4.peg.790
ETAE_3432	rpmE	Unknown	ribosomal protein L31	fig|718251.4.peg.3180	fig|667120.3.peg.1963	fig|67780.5.peg.1763	fig|634503.5.peg.3573	fig|667121.3.peg.2028	fig|500638.4.peg.3086	fig|636.4.peg.786
ETAE_3433	priA	Unknown	primosomal protein N' (replication factor Y) - superfamily II helicase	fig|718251.4.peg.3181	fig|667120.3.peg.1962	fig|67780.5.peg.1764	fig|634503.5.peg.3572	fig|667121.3.peg.2027	fig|500638.4.peg.3087	fig|636.4.peg.785
ETAE_3434		Cytoplasmic	transcriptional regulator	fig|718251.4.peg.3182	fig|667120.3.peg.1961	fig|67780.5.peg.1765	fig|634503.5.peg.3571	fig|667121.3.peg.2026	fig|500638.4.peg.3088	fig|636.4.peg.784
ETAE_3435	ftsN	CytoplasmicMembrane	cell division protein	fig|718251.4.peg.3183	fig|667120.3.peg.1960	fig|67780.5.peg.1766	fig|634503.5.peg.3570	fig|667121.3.peg.2025	fig|500638.4.peg.3089	fig|636.4.peg.783
ETAE_3436	hslV	Cytoplasmic	ATP-dependent protease peptidase subunit	fig|718251.4.peg.3184	fig|667120.3.peg.1959	fig|67780.5.peg.1767	fig|634503.5.peg.3569	fig|667121.3.peg.2024	fig|500638.4.peg.3090	fig|636.4.peg.782
ETAE_3437		Unknown	ATP-dependent protease ATP-binding subunit	fig|718251.4.peg.3185	fig|667120.3.peg.1958	fig|67780.5.peg.1768	fig|634503.5.peg.3568	fig|667121.3.peg.2023	fig|500638.4.peg.3091	fig|636.4.peg.781
ETAE_3438	menA	CytoplasmicMembrane	1,4-dihydroxy-2-naphthoate octaprenyltransferase	fig|718251.4.peg.3186	fig|667120.3.peg.1957	fig|67780.5.peg.1769	fig|634503.5.peg.3567	fig|667121.3.peg.2022	fig|500638.4.peg.3092	fig|636.4.peg.780
ETAE_3439	rraA	Cytoplasmic	ribonuclease activity regulator protein	fig|718251.4.peg.3187	fig|667120.3.peg.1956	fig|67780.5.peg.1770	fig|634503.5.peg.3566	fig|667121.3.peg.2021	fig|500638.4.peg.3093	fig|636.4.peg.779
ETAE_3440		Cytoplasmic	hypothetical protein	fig|718251.4.peg.3188	fig|667120.3.peg.1955	fig|67780.5.peg.1771	fig|634503.5.peg.3565	fig|667121.3.peg.2020	fig|500638.4.peg.3094	fig|636.4.peg.778
ETAE_3441	glpF	CytoplasmicMembrane	glycerol uptake facilitator protein	fig|718251.4.peg.3189	fig|667120.3.peg.1953	fig|67780.5.peg.1773	fig|634503.5.peg.3563	fig|667121.3.peg.2019	fig|500638.4.peg.3095	fig|636.4.peg.777
ETAE_3442	glpK	Cytoplasmic	glycerol kinase	fig|718251.4.peg.3190	fig|667120.3.peg.1952	fig|67780.5.peg.1774	fig|634503.5.peg.3562	fig|667121.3.peg.2018	fig|500638.4.peg.3096	fig|636.4.peg.776
ETAE_3443	glpX	Cytoplasmic	fructose 1,6-bisphosphatase II	fig|718251.4.peg.3191	fig|667120.3.peg.1951	fig|67780.5.peg.1775	fig|634503.5.peg.3561	fig|667121.3.peg.2017	fig|500638.4.peg.3097	fig|636.4.peg.775
ETAE_3444	emrD	CytoplasmicMembrane	multidrug resistance protein D	fig|718251.4.peg.3192	fig|667120.3.peg.1950	fig|67780.5.peg.1776	fig|634503.5.peg.3560	fig|667121.3.peg.2016	fig|500638.4.peg.3098	fig|636.4.peg.774
ETAE_3445		Cytoplasmic	transcriptional regulator	fig|718251.4.peg.3193	fig|667120.3.peg.1949	fig|67780.5.peg.1777	fig|634503.5.peg.3559	fig|667121.3.peg.2015	fig|500638.4.peg.3099	fig|636.4.peg.773
ETAE_3446	fpr	Cytoplasmic	ferredoxin-NADP reductase	fig|718251.4.peg.3194	fig|667120.3.peg.1948	fig|67780.5.peg.1778	fig|634503.5.peg.3558	fig|667121.3.peg.2014	fig|500638.4.peg.3100	fig|636.4.peg.772
ETAE_3447		CytoplasmicMembrane	hypothetical protein	fig|718251.4.peg.3195	fig|667120.3.peg.1947	fig|67780.5.peg.1779	fig|634503.5.peg.3557	fig|667121.3.peg.2013	fig|500638.4.peg.3101	fig|636.4.peg.771
ETAE_3448		Unknown	hypothetical protein	fig|718251.4.peg.3196	fig|667120.3.peg.1946	fig|67780.5.peg.1780	fig|634503.5.peg.3556	fig|667121.3.peg.2012	fig|500638.4.peg.3102	fig|636.4.peg.770
ETAE_3449	tpiA	Unknown	Triosephosphate isomerase	fig|718251.4.peg.3197	fig|667120.3.peg.1945	fig|67780.5.peg.1781	fig|634503.5.peg.3555	fig|667121.3.peg.2011	fig|500638.4.peg.3103	fig|636.4.peg.769
ETAE_3450	pfk	Cytoplasmic	6-phosphofructokinase	fig|718251.4.peg.3198	fig|667120.3.peg.1944	fig|67780.5.peg.1759	fig|634503.5.peg.3577	fig|667121.3.peg.2010	fig|500638.4.peg.3104	fig|636.4.peg.768
ETAE_3451	fieF	CytoplasmicMembrane	ferrous iron efflux protein F	fig|718251.4.peg.3199	fig|667120.3.peg.1943	fig|67780.5.peg.1758	fig|634503.5.peg.3578	fig|667121.3.peg.2009	fig|500638.4.peg.3105	fig|636.4.peg.767
ETAE_3452	cpxP	Periplasmic	periplasmic stress adaptor protein	fig|718251.4.peg.3200	fig|667120.3.peg.1942	fig|67780.5.peg.1757	fig|634503.5.peg.3579	fig|667121.3.peg.3284	fig|500638.4.peg.3107	fig|636.4.peg.766
ETAE_3453	cpxR	Cytoplasmic	response regulators consisting of a CheY-like receiver domain and a winged-helix DNA-binding domain	fig|718251.4.peg.3201	fig|667120.3.peg.1941	fig|67780.5.peg.1756	fig|634503.5.peg.3580	fig|667121.3.peg.3285	fig|500638.4.peg.3108	fig|636.4.peg.765
ETAE_3454	cpxA	CytoplasmicMembrane	two-component sensor protein	fig|718251.4.peg.3202	fig|667120.3.peg.1940	fig|67780.5.peg.1755	fig|634503.5.peg.3581	fig|667121.3.peg.3286	fig|500638.4.peg.3109	fig|636.4.peg.764
ETAE_3455	cspR	Unknown	RNA methyltransferase, TrmH family, group 2	fig|718251.4.peg.3203	fig|667120.3.peg.1939	fig|67780.5.peg.1754	fig|634503.5.peg.3582	fig|667121.3.peg.3287	fig|500638.4.peg.3110	fig|636.4.peg.763
ETAE_3456	cysE	Cytoplasmic	serine acetyltransferase	fig|718251.4.peg.3204	fig|667120.3.peg.1938	fig|67780.5.peg.1753	fig|634503.5.peg.3583	fig|667121.3.peg.3288	fig|500638.4.peg.3111	fig|636.4.peg.762
ETAE_3457	gpsA	Unknown	glycerol-3-phosphate dehydrogenase (NAD(P)+)	fig|718251.4.peg.3205	fig|667120.3.peg.1937	fig|67780.5.peg.1752	fig|634503.5.peg.3584	fig|667121.3.peg.3289	fig|500638.4.peg.3112	fig|636.4.peg.761
ETAE_3458	secB	Cytoplasmic	preprotein translocase subunit	fig|718251.4.peg.3206	fig|667120.3.peg.1936	fig|67780.5.peg.1751	fig|634503.5.peg.3585	fig|667121.3.peg.3290	fig|500638.4.peg.3113	fig|636.4.peg.760
ETAE_3459	grxC	Cytoplasmic	glutaredoxin 3	fig|718251.4.peg.3207	fig|667120.3.peg.1935	fig|67780.5.peg.1750	fig|634503.5.peg.3586	fig|667121.3.peg.3291	fig|500638.4.peg.3114	fig|636.4.peg.759
ETAE_3460		Unknown	rhodanese domain protein	fig|718251.4.peg.3208	fig|667120.3.peg.1934	fig|67780.5.peg.1749	fig|634503.5.peg.3587	fig|667121.3.peg.3292	fig|500638.4.peg.3115	fig|636.4.peg.758
ETAE_3461	gpm	Cytoplasmic	phosphoglycerate mutase	fig|718251.4.peg.3209	fig|667120.3.peg.1933	fig|67780.5.peg.1748	fig|634503.5.peg.3588	fig|667121.3.peg.3293	fig|500638.4.peg.3116	fig|636.4.peg.757
ETAE_3462		Unknown	membrane-bound metallopeptidase	fig|718251.4.peg.3210	fig|667120.3.peg.1932	fig|67780.5.peg.1747	fig|634503.5.peg.3589	fig|667121.3.peg.3294	fig|500638.4.peg.3117	fig|636.4.peg.756
ETAE_3463		Unknown	hypothetical protein	fig|718251.4.peg.3211	fig|667120.3.peg.1931	fig|67780.5.peg.1746	fig|634503.5.peg.3590	fig|667121.3.peg.3295	fig|500638.4.peg.3118	fig|636.4.peg.755
ETAE_3464		Cytoplasmic	hypothetical protein	fig|718251.4.peg.3212	fig|667120.3.peg.1930	fig|67780.5.peg.1745	fig|634503.5.peg.3591	fig|667121.3.peg.2348	fig|500638.4.peg.2954	fig|636.4.peg.3457
ETAE_3465	lysR	Cytoplasmic	LysR family transcriptional regulatory protein	fig|718251.4.peg.3213	fig|667120.3.peg.1929	fig|67780.5.peg.1744	fig|634503.5.peg.3592	fig|667121.3.peg.2349	fig|500638.4.peg.2953	fig|636.4.peg.3458
ETAE_3466	murI	Unknown	glutamate racemase	fig|718251.4.peg.3214	fig|667120.3.peg.3960	fig|67780.5.peg.356	fig|634503.5.peg.3593	fig|667121.3.peg.955	fig|500638.4.peg.64	fig|636.4.peg.930
ETAE_3467	btuB	OuterMembrane	vitamin B12/cobalamin outer membrane transporter	fig|718251.4.peg.3215	fig|667120.3.peg.3959	fig|67780.5.peg.357	fig|634503.5.peg.3594	fig|667121.3.peg.956	fig|500638.4.peg.63	fig|636.4.peg.931
ETAE_3468		Unknown	hypothetical protein	fig|718251.4.peg.3216	fig|667120.3.peg.3958	fig|67780.5.peg.358	fig|634503.5.peg.3595	fig|667121.3.peg.957	fig|500638.4.peg.62	fig|636.4.peg.932
ETAE_3469	aphA	Unknown	acid phosphatase/phosphotransferase	fig|718251.4.peg.3217	fig|667120.3.peg.3957	fig|67780.5.peg.359	fig|634503.5.peg.3596	fig|667121.3.peg.958	fig|500638.4.peg.1754	fig|636.4.peg.933
ETAE_3472	trmA	Unknown	tRNA (uracil-5-)-methyltransferase	fig|718251.4.peg.3220	fig|667120.3.peg.3954	fig|67780.5.peg.361	fig|634503.5.peg.3598	fig|667121.3.peg.653	fig|500638.4.peg.59	fig|636.4.peg.935
ETAE_3474		Unknown	transcriptional regulator, TetR family	fig|718251.4.peg.3222	fig|667120.3.peg.3952	fig|67780.5.peg.659	fig|634503.5.peg.3601	fig|667121.3.peg.651	fig|500638.4.peg.57	fig|636.4.peg.937
ETAE_3475		Cytoplasmic	pyridine nucleotide-disulphide oxidoreductase	fig|718251.4.peg.3223	fig|667120.3.peg.3951	fig|67780.5.peg.657	fig|634503.5.peg.3602	fig|667121.3.peg.650	fig|500638.4.peg.56	fig|636.4.peg.938
ETAE_3476		Cytoplasmic	transcriptional regulator, LysR family	fig|718251.4.peg.3224	fig|667120.3.peg.3950	fig|67780.5.peg.656	fig|634503.5.peg.3603	fig|667121.3.peg.649	fig|500638.4.peg.55	fig|636.4.peg.939
ETAE_3477		Unknown	glutaredoxin-family domain protein	fig|718251.4.peg.3225	fig|667120.3.peg.3949	fig|67780.5.peg.655	fig|634503.5.peg.3604	fig|667121.3.peg.648	fig|500638.4.peg.54	fig|636.4.peg.940
ETAE_3478		Cytoplasmic	pyridine nucleotide-disulphide oxidoreductase	fig|718251.4.peg.3226	fig|667120.3.peg.3948	fig|67780.5.peg.654	fig|634503.5.peg.3605	fig|667121.3.peg.1505	fig|500638.4.peg.53	fig|636.4.peg.941
ETAE_3479	argH	Cytoplasmic	argininosuccinate lyase	fig|718251.4.peg.3227	fig|667120.3.peg.3947	fig|67780.5.peg.653	fig|634503.5.peg.3606	fig|667121.3.peg.1504	fig|500638.4.peg.52	fig|636.4.peg.942
ETAE_3480	argG	Unknown	argininosuccinate synthase	fig|718251.4.peg.3228	fig|667120.3.peg.3946	fig|67780.5.peg.652	fig|634503.5.peg.3607	fig|667121.3.peg.1503	fig|500638.4.peg.51	fig|636.4.peg.943
ETAE_3481	argB	Unknown	acetylglutamate kinase	fig|718251.4.peg.3229	fig|667120.3.peg.3945	fig|67780.5.peg.651	fig|634503.5.peg.3608	fig|667121.3.peg.1502	fig|500638.4.peg.50	fig|636.4.peg.944
ETAE_3482	argC	Unknown	N-acetyl-gamma-glutamyl-phosphate reductase	fig|718251.4.peg.3230	fig|667120.3.peg.3944	fig|67780.5.peg.650	fig|634503.5.peg.3609	fig|667121.3.peg.1501	fig|500638.4.peg.49	fig|636.4.peg.945
ETAE_3483	argE	Cytoplasmic	acetylornithine deacetylase	fig|718251.4.peg.3231	fig|667120.3.peg.3943	fig|67780.5.peg.649	fig|634503.5.peg.3610	fig|667121.3.peg.1500	fig|500638.4.peg.48	fig|636.4.peg.946
ETAE_3484	ppc	Cytoplasmic	phosphoenolpyruvate carboxylase	fig|718251.4.peg.3232	fig|667120.3.peg.3942	fig|67780.5.peg.648	fig|634503.5.peg.3611	fig|667121.3.peg.1499	fig|500638.4.peg.47	fig|636.4.peg.947
ETAE_3485	metF	Cytoplasmic	5,10-methylenetetrahydrofolate reductase	fig|718251.4.peg.3233	fig|667120.3.peg.3941	fig|67780.5.peg.647	fig|634503.5.peg.3612	fig|667121.3.peg.1498	fig|500638.4.peg.46	fig|636.4.peg.948
ETAE_3486		Unknown	hypothetical protein	fig|718251.4.peg.3234	fig|667120.3.peg.3940	fig|67780.5.peg.646	fig|634503.5.peg.3613	fig|667121.3.peg.1497	fig|500638.4.peg.45	fig|636.4.peg.949
ETAE_3487		Cytoplasmic	hypothetical protein	fig|718251.4.peg.3235	fig|667120.3.peg.3937	fig|67780.5.peg.644	fig|634503.5.peg.3615	fig|667121.3.peg.1496	fig|500638.4.peg.44	fig|636.4.peg.950
ETAE_3488	mdfA	CytoplasmicMembrane	multidrug translocase	fig|718251.4.peg.3236	fig|667120.3.peg.3936	fig|67780.5.peg.643	fig|634503.5.peg.3616	fig|667121.3.peg.1495	fig|500638.4.peg.43	fig|636.4.peg.951
ETAE_3489	dtd	Unknown	D-Tyr-tRNAtyr deacylase	fig|718251.4.peg.3237	fig|667120.3.peg.3935	fig|67780.5.peg.642	fig|634503.5.peg.3617	fig|667121.3.peg.1494	fig|500638.4.peg.42	fig|636.4.peg.952
ETAE_3490	rbn	CytoplasmicMembrane	ribonuclease BN	fig|718251.4.peg.3238	fig|667120.3.peg.3934	fig|67780.5.peg.641	fig|634503.5.peg.3618	fig|667121.3.peg.1493	fig|500638.4.peg.41	fig|636.4.peg.953
ETAE_3491		Unknown	phosphatase	fig|718251.4.peg.3239	fig|667120.3.peg.3933	fig|67780.5.peg.640	fig|634503.5.peg.3619	fig|667121.3.peg.1492	fig|500638.4.peg.40	fig|636.4.peg.954
ETAE_3492	yihK	Cytoplasmic	GTP-binding protein	fig|718251.4.peg.3240	fig|667120.3.peg.3932	fig|67780.5.peg.639	fig|634503.5.peg.3620	fig|667121.3.peg.1491	fig|500638.4.peg.39	fig|636.4.peg.2210
ETAE_3493	glnA	Cytoplasmic	glutamine synthetase	fig|718251.4.peg.3241	fig|667120.3.peg.3931	fig|67780.5.peg.638	fig|634503.5.peg.3621	fig|667121.3.peg.1490	fig|500638.4.peg.38	fig|636.4.peg.2209
ETAE_3494	ntrB	CytoplasmicMembrane	nitrogen regulation protein NR(II)	fig|718251.4.peg.3242	fig|667120.3.peg.3930	fig|67780.5.peg.637	fig|634503.5.peg.3622	fig|667121.3.peg.1489	fig|500638.4.peg.37	fig|636.4.peg.2208
ETAE_3497		CytoplasmicMembrane	hypothetical protein	fig|718251.4.peg.3245	fig|667120.3.peg.3927	fig|67780.5.peg.634	fig|634503.5.peg.3625	fig|667121.3.peg.1486	fig|500638.4.peg.33	fig|636.4.peg.2205
ETAE_3498	hemN	Cytoplasmic	coproporphyrinogen III oxidase and related Fe-S oxidoreductases	fig|718251.4.peg.3246	fig|667120.3.peg.3926	fig|67780.5.peg.633	fig|634503.5.peg.3626	fig|667121.3.peg.1485	fig|500638.4.peg.32	fig|636.4.peg.2204
ETAE_3501	engB	Unknown	GTPase	fig|718251.4.peg.3248	fig|667120.3.peg.3923	fig|67780.5.peg.630	fig|634503.5.peg.3629	fig|667121.3.peg.1483	fig|500638.4.peg.30	fig|636.4.peg.2202
ETAE_3502	polA	Unknown	DNA polymerase I	fig|718251.4.peg.3249	fig|667120.3.peg.3922	fig|67780.5.peg.629	fig|634503.5.peg.3630	fig|667121.3.peg.1482	fig|500638.4.peg.29	fig|636.4.peg.2201
ETAE_3503		Unknown	phospholipid/glycerol acyltransferase	fig|718251.4.peg.3250	fig|667120.3.peg.3921	fig|67780.5.peg.628	fig|634503.5.peg.3631	fig|667121.3.peg.1481	fig|500638.4.peg.28	fig|636.4.peg.2200
ETAE_3504	dsbA	Periplasmic	periplasmic protein disulfide isomerase I	fig|718251.4.peg.3251	fig|667120.3.peg.3920	fig|67780.5.peg.627	fig|634503.5.peg.3632	fig|667121.3.peg.1480	fig|500638.4.peg.27	fig|636.4.peg.2199
ETAE_3505		Cytoplasmic	aminoglycoside phosphotransferase	fig|718251.4.peg.3252	fig|667120.3.peg.3919	fig|67780.5.peg.626	fig|634503.5.peg.3633	fig|667121.3.peg.1479	fig|500638.4.peg.26	fig|636.4.peg.2198
ETAE_3506		Cytoplasmic	hypothetical protein	fig|718251.4.peg.3253	fig|667120.3.peg.3918	fig|67780.5.peg.625	fig|634503.5.peg.3634	fig|667121.3.peg.1478	fig|500638.4.peg.25	fig|636.4.peg.2197
ETAE_3507	mobA	Unknown	molybdopterin-guanine dinucleotide biosynthesis protein A	fig|718251.4.peg.3254	fig|667120.3.peg.3917	fig|67780.5.peg.624	fig|634503.5.peg.3635	fig|667121.3.peg.1477	fig|500638.4.peg.24	fig|636.4.peg.2196
ETAE_3508	mobB	Cytoplasmic	molybdopterin-guanine dinucleotide biosynthesis protein b	fig|718251.4.peg.3255	fig|667120.3.peg.3916	fig|67780.5.peg.623	fig|634503.5.peg.3636	fig|667121.3.peg.1476	fig|500638.4.peg.23	fig|636.4.peg.2195
ETAE_3509		Unknown	putative GntR-famly transcriptional regulator	fig|718251.4.peg.3256	fig|667120.3.peg.3961	fig|67780.5.peg.133	fig|634503.5.peg.3637	fig|667121.3.peg.3169	fig|500638.4.peg.3193	fig|636.4.peg.681
ETAE_3510		CytoplasmicMembrane	drug resistance transporter, EmrB/QacA subfamily	fig|718251.4.peg.3257	fig|667120.3.peg.3962	fig|67780.5.peg.134	fig|634503.5.peg.3638	fig|667121.3.peg.3168	fig|500638.4.peg.3192	fig|636.4.peg.682
ETAE_3511	rbsR	Cytoplasmic	transcriptional repressor	fig|718251.4.peg.3258	fig|667120.3.peg.3963	fig|67780.5.peg.135	fig|634503.5.peg.3639	fig|667121.3.peg.3167	fig|500638.4.peg.3191	fig|636.4.peg.683
ETAE_3512	rbsK	Cytoplasmic	ribokinase	fig|718251.4.peg.3259	fig|667120.3.peg.3964	fig|67780.5.peg.136	fig|634503.5.peg.3640	fig|667121.3.peg.3166	fig|500638.4.peg.3190	fig|636.4.peg.684
ETAE_3513	rbsB	Periplasmic	D-ribose periplasmic binding protein	fig|718251.4.peg.3260	fig|667120.3.peg.3965	fig|67780.5.peg.137	fig|634503.5.peg.3641	fig|667121.3.peg.3165	fig|500638.4.peg.3189	fig|636.4.peg.685
ETAE_3514	rbsC	CytoplasmicMembrane	ribose ABC transporter permease protein	fig|718251.4.peg.3261	fig|667120.3.peg.3966	fig|67780.5.peg.138	fig|634503.5.peg.3642	fig|667121.3.peg.3164	fig|500638.4.peg.3188	fig|636.4.peg.686
ETAE_3516	rbsD	Cytoplasmic	high-affinity D-ribose transport protein	fig|718251.4.peg.3263	fig|667120.3.peg.3968	fig|67780.5.peg.140	fig|634503.5.peg.3644	fig|667121.3.peg.3162	fig|500638.4.peg.3186	fig|636.4.peg.688
ETAE_3517	kup	CytoplasmicMembrane	K+ transporter	fig|718251.4.peg.3264	fig|667120.3.peg.3969	fig|67780.5.peg.141	fig|634503.5.peg.3645	fig|667121.3.peg.3161	fig|500638.4.peg.3185	fig|636.4.peg.689
ETAE_3519		Cytoplasmic	hypothetical protein	fig|718251.4.peg.3265	fig|667120.3.peg.3970	fig|67780.5.peg.142	fig|634503.5.peg.3646	fig|667121.3.peg.3160	fig|500638.4.peg.3184	fig|636.4.peg.690
ETAE_3520	vwa	Cytoplasmic	Von Willebrand Factor Type A (VWA) domain-containing protein	fig|718251.4.peg.3266	fig|667120.3.peg.3971	fig|67780.5.peg.143	fig|634503.5.peg.3647	fig|667121.3.peg.3159	fig|500638.4.peg.3183	fig|636.4.peg.691
ETAE_3521	asnA	Cytoplasmic	asparagine synthetase A	fig|718251.4.peg.3267	fig|667120.3.peg.3972	fig|67780.5.peg.144	fig|634503.5.peg.3648	fig|667121.3.peg.3158	fig|500638.4.peg.3182	fig|636.4.peg.692
ETAE_3522	asnC	Cytoplasmic	DNA-binding transcriptional regulator	fig|718251.4.peg.3268	fig|667120.3.peg.3973	fig|67780.5.peg.145	fig|634503.5.peg.3649	fig|667121.3.peg.3157	fig|500638.4.peg.3181	fig|636.4.peg.693
ETAE_3523	fldA	Cytoplasmic	flavodoxin	fig|718251.4.peg.3269	fig|667120.3.peg.3974	fig|67780.5.peg.146	fig|634503.5.peg.3650	fig|667121.3.peg.3156	fig|500638.4.peg.3180	fig|636.4.peg.694
ETAE_3524	gidA	Cytoplasmic	glucose-inhibited cell division protein A (tRNA uridine 5-carboxymethylaminomethyl modification enzyme)	fig|718251.4.peg.3270	fig|667120.3.peg.3975	fig|67780.5.peg.147	fig|634503.5.peg.3651	fig|667121.3.peg.3155	fig|500638.4.peg.3179	fig|636.4.peg.695
ETAE_3525	gidB	Unknown	glucose-inhibited cell division protein B (S-adenosylmethionine-dependent methyltransferase)	fig|718251.4.peg.3271	fig|667120.3.peg.3976	fig|67780.5.peg.148	fig|634503.5.peg.3652	fig|667121.3.peg.3154	fig|500638.4.peg.3178	fig|636.4.peg.696
ETAE_3527	atpB	CytoplasmicMembrane	F-type H+-transporting ATPase a chain	fig|718251.4.peg.3273	fig|667120.3.peg.3978	fig|67780.5.peg.150	fig|634503.5.peg.3654	fig|667121.3.peg.3152	fig|500638.4.peg.3176	fig|636.4.peg.698
ETAE_3528	atpE	CytoplasmicMembrane	F-type H+-transporting ATPase c chain	fig|718251.4.peg.3274	fig|667120.3.peg.3979	fig|67780.5.peg.151	fig|634503.5.peg.3655	fig|667121.3.peg.3151	fig|500638.4.peg.3175	fig|636.4.peg.699
ETAE_3529	atpF	Cytoplasmic	F-type H+-transporting ATPase b chain	fig|718251.4.peg.3275	fig|667120.3.peg.3980	fig|67780.5.peg.152	fig|634503.5.peg.3656	fig|667121.3.peg.3150	fig|500638.4.peg.3174	fig|636.4.peg.700
ETAE_3540	pstA	CytoplasmicMembrane	ABC-type phosphate transport system, permease component	fig|718251.4.peg.3286	fig|667120.3.peg.3991	fig|67780.5.peg.164	fig|634503.5.peg.3668	fig|667121.3.peg.3139	fig|500638.4.peg.3163	fig|636.4.peg.710
[truncated: 12 more rows]

## Sheet: EdwGI orthologous
CDS	Gene	Location	FL6-60	80813	Annotation
ETAE_3223	rplP	Unknown	fig|718251.4.peg.2999	fig|667120.3.peg.10	50S ribosomal protein L16
[truncated: 2,764 more rows]

## Sheet: EdwGII orthologous
CDS	Gene	Location	ATCC15947	ATCC23685	DT	Annotation
[truncated: 3,132 more rows]

## Sheet: E.ictaluri orthologous
CDS	Gene	Location	ATCC33202	93-146	Annotation
[truncated: 3,560 more rows]

[truncated: 3 more sheets: E.tarda specific gene, EdwGI specific gene, EdwGI & E.ictaluri specific]
